# Supplementary material for: CRISPR Screens Identify Novel Regulators of cFLIP Dependency and Ligand-Independent, TRAIL-R1-Mediated Cell Death
Source: bioRxiv preprint, doi:10.1101/2022.08.17.504167, version 2 (2023-02-03)
Supplement: Supplemental Data File 1 [file 504167_file03.xlsx]

## Sheet: BCBL1_sgRNA
id	num	neg|score	neg|p-value	neg|fdr	neg|rank	neg|goodsgrna	neg|lfc	pos|score	pos|p-value	pos|fdr	pos|rank	pos|goodsgrna	pos|lfc
FADD	4	1	1	1	19084	0	4.4137	3.4062e-09	2.5941e-07	0.00165	1	4	4.4137
UBA5	4	1	1	1	19083	0	4.3845	2.1984e-08	2.5941e-07	0.00165	2	4	4.3845
UFC1	4	1	1	1	19082	0	3.7108	8.0811e-08	2.5941e-07	0.00165	3	4	3.7108
UFSP2	4	1	1	1	19081	0	4.0102	2.0393e-07	1.0376e-06	0.00495	4	4	4.0102
TNFRSF10A	4	1	1	1	19080	0	3.6704	2.1225e-07	1.297e-06	0.00495	5	4	3.6704
CXCR4	4	1	1	1	19079	0	3.5643	5.2428e-07	2.3346e-06	0.00495	6	4	3.5643
CTBP1	4	1	1	1	19078	0	3.6853	5.3265e-07	2.3346e-06	0.00495	7	4	3.6853
UFM1	4	1	1	1	19077	0	3.8549	5.7267e-07	2.3346e-06	0.00495	8	4	3.8549
CSGALNACT1	4	1	1	1	19076	0	3.5283	5.9636e-07	2.3346e-06	0.00495	9	4	3.5283
XYLT2	4	1	1	1	19075	0	3.7146	8.076e-07	2.8535e-06	0.005446	10	4	3.7146
UPF1	4	0.99384	0.99388	1	18782	0	3.6518	2.9944e-06	1.1154e-05	0.019352	11	3	3.6518
CASP8	4	0.85653	0.85647	1	16085	0	4.226	3.7998e-06	1.323e-05	0.020944	12	3	4.226
GTF2E2	4	1	1	1	19074	0	2.3154	3.9768e-06	1.4267e-05	0.020944	13	4	2.3154
B4GALT7	4	0.92035	0.92047	1	17301	0	4.1781	5.038e-06	1.9455e-05	0.024443	14	3	4.1781
DOT1L	4	0.99999	0.99999	1	19073	0	2.5356	5.2317e-06	1.9974e-05	0.024443	15	4	2.5356
CS	4	0.99946	0.99947	1	19007	0	3.4083	5.5861e-06	2.0493e-05	0.024443	16	4	3.4083
DDRGK1	4	0.99999	0.99999	1	19072	0	3.4175	6.0103e-06	2.3087e-05	0.025917	17	4	3.4175
DDX5	4	0.99999	0.99999	1	19070	0	2.1223	9.8901e-06	3.7614e-05	0.035891	18	4	2.1223
PARS2	4	0.99999	0.99999	1	19071	0	3.3091	9.8901e-06	3.7614e-05	0.035891	19	4	3.3091
B3GAT3	4	0.99999	0.99999	1	19069	0	3.4089	1.1151e-05	4.1764e-05	0.037954	20	4	3.4089
SBDS	4	0.99999	0.99998	1	19068	0	2.3628	1.1944e-05	4.7471e-05	0.04025	21	4	2.3628
UXS1	4	0.99999	0.99998	1	19067	0	3.6019	1.3958e-05	5.5772e-05	0.044348	22	4	3.6019
PPA2	3	0.98062	0.98075	1	18436	0	1.4232	2.0016e-05	6.3036e-05	0.04703	23	2	1.4232
KDM2A	3	0.8526	0.85262	1	16010	0	4.019	2.0174e-05	6.4073e-05	0.04703	24	2	4.019
MRPL38	2	0.99998	0.99997	1	19066	0	3.7518	2.0767e-05	3.3982e-05	0.035891	25	2	3.7518
ADIPOR1	4	0.99988	0.99989	1	19056	0	3.1706	2.2462e-05	9.157e-05	0.064723	26	4	3.1706
EIF1AD	2	0.99997	0.99996	1	19065	0	3.8815	3.0816e-05	4.8509e-05	0.04025	27	2	3.8815
SYNRG	4	0.99997	0.99996	1	19064	0	2.3647	3.4313e-05	0.00013308	0.0907	28	4	2.3647
EARS2	4	0.716	0.72286	1	13571	1	2.6735	3.684e-05	0.00014138	0.093035	29	3	2.6735
GANAB	4	0.74522	0.74744	1	14034	1	2.6286	3.9866e-05	0.00015331	0.097525	30	2	2.6286
PCBP2	4	0.99881	0.99879	1	18972	0	3.2466	4.7655e-05	0.00018599	0.107018	31	4	3.2466
SHQ1	4	0.98772	0.98771	1	18638	0	3.022	4.8904e-05	0.00019066	0.107018	32	3	3.022
PAPSS1	3	0.99995	0.99995	1	19063	0	3.192	5.4688e-05	0.0001668	0.099474	33	3	3.192
ZNF417	4	0.99994	0.99994	1	19062	0	2.3287	5.5666e-05	0.0002192	0.116199	34	4	2.3287
JAGN1	4	0.99994	0.99994	1	19061	0	3.1204	5.7072e-05	0.00022594	0.116337	35	4	3.1204
EXOSC1	4	0.99994	0.99994	1	19060	0	2.8653	5.7989e-05	0.00023165	0.116337	36	4	2.8653
CBLL1	4	0.99994	0.99993	1	19059	0	2.4305	6.2102e-05	0.00025085	0.122747	37	4	2.4305
NR2C2AP	4	0.99886	0.99884	1	18981	0	2.6743	7.0269e-05	0.00028094	0.134035	38	4	2.6743
UGDH	4	0.99992	0.99992	1	19058	0	3.2073	7.7334e-05	0.00031103	0.139626	39	4	3.2073
MPP2	4	0.1082	0.2231	0.982251	4276	2	-0.22024	8.0063e-05	0.00032192	0.139626	40	1	-0.22024
EXOSC2	2	0.99992	0.99991	1	19057	0	3.4874	8.2823e-05	0.00016109	0.09917	41	2	3.4874
C1orf27	4	0.99984	0.99984	1	19053	0	3.5029	8.8329e-05	0.00034734	0.147305	42	4	3.5029
DIEXF	3	0.2803	0.38519	0.997035	7801	1	3.4727	0.00010008	0.00030532	0.139626	43	2	3.4727
SRP68	4	0.99988	0.99988	1	19055	0	2.6039	0.00012335	0.00048535	0.197072	44	4	2.6039
MRPS16	3	0.99957	0.99956	1	19025	0	3.2823	0.00012434	0.00037951	0.157447	45	3	3.2823
COMMD3	4	0.10974	0.22486	0.982788	4307	1	2.6203	0.00013784	0.00054709	0.213073	46	3	2.6203
EFTUD1	4	0.065172	0.14868	0.971423	2868	1	2.2703	0.00014609	0.00058081	0.213992	47	2	2.2703
GINS4	4	0.99448	0.9945	1	18799	0	2.4311	0.00015046	0.0005943	0.213992	48	3	2.4311
XPR1	4	0.99984	0.99985	1	19054	0	2.8689	0.00015652	0.00061349	0.21417	49	4	2.8689
ELAVL1	4	0.9145	0.91455	1	17192	0	2.5924	0.00016076	0.00062906	0.21417	50	3	2.5924
MTO1	4	0.99984	0.99984	1	19052	0	1.6668	0.00016486	0.00064307	0.21417	51	4	1.6668
HTRA2	4	0.99983	0.99983	1	19051	0	1.9074	0.00017164	0.00066278	0.21417	52	4	1.9074
NDUFS2	3	0.99982	0.99982	1	19050	0	3.4727	0.00017636	0.00053308	0.211943	53	3	3.4727
RNASEH2A	4	0.99695	0.99698	1	18890	0	2.8792	0.00017647	0.00068094	0.21417	54	3	2.8792
PPP5D1	4	0.10034	0.21427	0.975216	4128	1	2.7357	0.00017834	0.00068457	0.21417	55	3	2.7357
ATP6V0E1	4	0.99982	0.99982	1	19049	0	1.6768	0.00018472	0.00070169	0.215985	56	4	1.6768
DPM3	4	0.9785	0.97865	1	18389	0	2.8083	0.00019047	0.00071933	0.2179	57	3	2.8083
SLC30A9	1	0.99981	0.99983	1	19048	0	5.135	0.00019349	0.00019637	0.107072	58	1	5.135
RBM17	4	0.77277	0.77282	1	14493	1	2.7152	0.00019578	0.0007406	0.218339	59	3	2.7152
CDK12	3	0.70652	0.70662	1	13426	0	3.2823	0.00019932	0.00058755	0.213992	60	2	3.2823
SLC35B2	4	0.99097	0.99097	1	18704	0	3.1546	0.00020194	0.00076499	0.218339	61	3	3.1546
NDUFS7	3	0.99978	0.99978	1	19047	0	2.1438	0.0002203	0.00065656	0.21417	62	3	2.1438
DYNLL1	4	0.99977	0.99978	1	19046	0	1.6711	0.00022509	0.00084592	0.234572	63	4	1.6711
BTF3L4	4	0.99977	0.99977	1	19045	0	1.9485	0.00023223	0.0008729	0.234572	64	4	1.9485
MRPL54	4	0.98673	0.98667	1	18598	0	3.0103	0.00023455	0.00087861	0.234572	65	3	3.0103
CCDC27	4	0.99976	0.99977	1	19044	0	1.7551	0.00023745	0.00088639	0.234572	66	4	1.7551
TAF8	4	0.27362	0.40604	1	7674	2	1.3018	0.00024762	0.00092063	0.237423	67	2	1.3018
MRPL34	4	0.99974	0.99975	1	19043	0	1.9845	0.00025572	0.00095643	0.240164	68	4	1.9845
PFDN2	3	0.00038026	0.0011235	0.617101	35	1	-0.2976	0.00026019	0.00076654	0.218339	69	1	-0.2976
BOP1	4	0.95051	0.95058	1	17885	0	2.4109	0.00026425	0.00098341	0.242892	70	3	2.4109
KIAA0100	4	0.99973	0.99974	1	19042	0	1.9412	0.00026702	0.00099274	0.242892	71	4	1.9412
NOA1	4	0.0015204	0.0054338	0.704486	141	1	1.7525	0.00027163	0.0010062	0.243076	72	3	1.7525
SRF	4	0.99972	0.99972	1	19041	0	1.6825	0.0002821	0.0010436	0.248948	73	4	1.6825
INTS10	2	0.9997	0.9997	1	19040	0	3.0416	0.00029586	0.00058237	0.213992	74	2	3.0416
KCTD10	3	0.99969	0.99969	1	19039	0	2.1161	0.00030629	0.00089728	0.234572	75	3	2.1161
MTHFD1	3	0.99969	0.99969	1	19038	0	1.7539	0.00030629	0.00089728	0.234572	76	3	1.7539
LSM2	1	0.99969	0.99971	1	19037	0	4.6604	0.00031359	0.00031933	0.139626	77	1	4.6604
GOLGA8H	3	0.99968	0.99968	1	19036	0	2.3375	0.00031976	0.00094657	0.240164	78	3	2.3375
CHP1	4	0.97501	0.97519	1	18297	0	2.6873	0.00031986	0.0011806	0.267269	79	3	2.6873
RPL7	2	0.99968	0.99967	1	19035	0	3.0675	0.00032405	0.00063892	0.21417	80	2	3.0675
VPS4A	4	0.99967	0.99967	1	19033	0	1.6631	0.00032663	0.0012044	0.267269	81	4	1.6631
SEC13	4	0.99967	0.99967	1	19034	0	2.0196	0.00032663	0.0012044	0.267269	82	4	2.0196
TTC4	4	0.99967	0.99967	1	19032	0	1.7249	0.00032663	0.0012044	0.267269	83	4	1.7249
ARHGAP22	4	0.077685	0.17278	0.971423	3331	3	-0.62294	0.0003469	0.0012698	0.272277	84	1	-0.62294
C15orf41	4	0.55975	0.61635	1	11553	1	0.91024	0.0003469	0.0012698	0.272277	85	2	0.91024
OCIAD1	4	0.39158	0.53004	1	9859	1	2.7785	0.00036703	0.0013507	0.273222	86	3	2.7785
TKT	4	0.99962	0.99963	1	19031	0	2.6123	0.00037646	0.0013834	0.273222	87	4	2.6123
MAD2L1	3	0.99962	0.99962	1	19030	0	2.0729	0.00038001	0.001123	0.264576	88	3	2.0729
NAA20	2	0.99961	0.99961	1	19028	0	3.0043	0.00038557	0.00075461	0.218339	89	2	3.0043
THOC7	4	0.99844	0.99842	1	18956	0	2.698	0.00038876	0.0014244	0.273222	90	4	2.698
ATP7A	3	0.99961	0.99961	1	19027	0	2.9898	0.00038965	0.0011479	0.267146	91	3	2.9898
PUS7	4	0.21502	0.34174	0.995653	6492	1	2.644	0.00039041	0.0014306	0.273222	92	3	2.644
PRKAR1A	4	0.93426	0.93436	1	17569	0	2.3805	0.00039518	0.0014498	0.273222	93	3	2.3805
WDR83	4	0.95365	0.95367	1	17930	0	2.4423	0.00040722	0.0014929	0.273222	94	3	2.4423
RWDD4	4	0.99958	0.99959	1	19026	0	2.8783	0.00041403	0.0015178	0.273222	95	4	2.8783
SNX19	4	0.9993	0.99932	1	19000	0	2.5705	0.00042624	0.0015562	0.273222	96	4	2.5705
C8orf86	4	0.73735	0.74057	1	13911	1	2.6312	0.00043065	0.0015728	0.273222	97	3	2.6312
SRP72	4	0.99433	0.99435	1	18796	0	2.9889	0.00043118	0.0015738	0.273222	98	3	2.9889
CHST15	4	0.99955	0.99955	1	19024	0	2.7446	0.00044799	0.0016418	0.275674	99	4	2.7446
USP17L28	3	0.45536	0.4959	1	10438	1	0.53347	0.0004603	0.0013595	0.273222	100	1	0.53347
RNASEH2C	4	0.99953	0.99953	1	19023	0	1.8307	0.00046728	0.0017186	0.275674	101	4	1.8307
GATB	4	0.99953	0.99953	1	19022	0	2.3874	0.00047308	0.0017398	0.275674	102	4	2.3874
PEMT	4	0.81807	0.81802	1	15340	0	2.6105	0.00047578	0.0017481	0.275674	103	3	2.6105
NCKAP1L	4	0.69251	0.70463	1	13221	1	0.21367	0.0004803	0.0017627	0.275674	104	1	0.21367
ARAP2	4	0.044941	0.1084	0.96183	2112	2	-0.43546	0.0004803	0.0017627	0.275674	105	1	-0.43546
EBNA1BP2	3	0.99951	0.99951	1	19021	0	2.1161	0.00048665	0.001428	0.273222	106	3	2.1161
JMJD6	4	0.47493	0.5703	1	10656	1	2.6372	0.00048872	0.0017891	0.275674	107	3	2.6372
MDH2	4	0.99797	0.99797	1	18937	0	2.4396	0.00049093	0.0017985	0.275674	108	4	2.4396
INTS7	3	0.99888	0.99891	1	18983	0	2.8351	0.00049268	0.0014446	0.273222	109	3	2.8351
CINP	3	0.99949	0.9995	1	19020	0	2.2522	0.00050534	0.0014789	0.273222	110	3	2.2522
ATP5J2	3	0.15964	0.25659	0.987131	5352	1	1.6988	0.00052033	0.0015136	0.273222	111	2	1.6988
WDR77	3	0.87018	0.87028	1	16386	0	-0.61478	0.00052033	0.0015136	0.273222	112	2	-0.61478
RPL32	3	0.99947	0.99948	1	19019	0	2.8351	0.0005275	0.0015323	0.273222	113	3	2.8351
MTFMT	4	0.99946	0.99947	1	19012	0	2.2316	0.00054214	0.001979	0.275674	114	4	2.2316
NDUFB6	4	0.99946	0.99947	1	19005	0	2.2808	0.00054214	0.001979	0.275674	115	4	2.2808
NAPA	4	0.99946	0.99947	1	19018	0	1.1932	0.00054214	0.001979	0.275674	116	4	1.1932
CFLAR	4	0.99946	0.99947	1	19014	0	0.7844	0.00054214	0.001979	0.275674	117	4	0.7844
RSL24D1	4	0.99946	0.99947	1	19017	0	0.54199	0.00054214	0.001979	0.275674	118	4	0.54199
PPCS	4	0.99946	0.99947	1	19010	0	0.96319	0.00054214	0.001979	0.275674	119	4	0.96319
PCNP	4	0.99946	0.99947	1	19013	0	1.4537	0.00054214	0.001979	0.275674	120	4	1.4537
PSMC5	4	0.99946	0.99947	1	19004	0	-0.61478	0.00054214	0.001979	0.275674	121	4	-0.61478
SAMM50	4	0.99946	0.99947	1	19011	0	1.3743	0.00054214	0.001979	0.275674	122	4	1.3743
KAT8	4	0.99946	0.99947	1	19008	0	1.4839	0.00054214	0.001979	0.275674	123	4	1.4839
POLR2H	4	0.99946	0.99947	1	19009	0	1.2276	0.00054214	0.001979	0.275674	124	4	1.2276
MED9	4	0.99946	0.99947	1	19006	0	1.7756	0.00054214	0.001979	0.275674	125	4	1.7756
ELP2	4	0.99946	0.99947	1	19016	0	-0.61478	0.00054214	0.001979	0.275674	126	4	-0.61478
ATP5E	4	0.99946	0.99947	1	19015	0	0.1742	0.00054214	0.001979	0.275674	127	4	0.1742
MED29	4	0.98559	0.98557	1	18566	0	2.7938	0.00054861	0.0020024	0.276905	128	3	2.7938
UQCRC1	4	0.2181	0.34513	0.995653	6550	1	0.6498	0.00056034	0.0020506	0.281537	129	1	0.6498
GNG3	4	0.4949	0.58066	1	10854	1	1.8337	0.00056966	0.0020978	0.283934	130	2	1.8337
RBM12	4	0.88744	0.88743	1	16701	0	1.8367	0.00058282	0.0021357	0.285017	131	2	1.8367
TBCE	3	0.99645	0.99653	1	18872	0	3.0331	0.00060522	0.0017538	0.275674	132	3	3.0331
VMA21	4	0.67687	0.69298	1	12993	1	1.4302	0.00062642	0.0022882	0.299098	133	3	1.4302
GFER	2	0.99936	0.99936	1	19003	0	2.9538	0.0006381	0.0012506	0.272277	134	2	2.9538
ZEB1	4	0.99935	0.99937	1	19002	0	1.6732	0.0006465	0.0023583	0.304121	135	4	1.6732
SPATA13	4	0.86026	0.86011	1	16169	0	2.5309	0.00064676	0.0023585	0.304121	136	3	2.5309
SLC25A22	4	0.24574	0.37543	0.996502	7136	1	1.9412	0.00067577	0.0024599	0.310898	137	3	1.9412
SIN3A	4	0.2799	0.413	1	7791	1	2.2944	0.00067577	0.0024599	0.310898	138	3	2.2944
PSMC6	2	0.99932	0.99932	1	19001	0	2.7688	0.00068476	0.0013372	0.273222	139	2	2.7688
COQ5	3	0.99926	0.99927	1	18999	0	2.5458	0.00073779	0.0021269	0.285017	140	3	2.5458
SNUPN	4	0.81506	0.81499	1	15269	0	1.5567	0.00074265	0.0027033	0.337184	141	2	1.5567
TYMS	4	0.99924	0.99925	1	18998	0	1.6748	0.00075753	0.0027541	0.34055	142	4	1.6748
PSMD11	2	0.033135	0.060316	0.93556	1671	1	1.5264	0.00076047	0.0014742	0.273222	143	1	1.5264
CASC3	4	0.99053	0.99053	1	18698	0	2.9737	0.00076467	0.0027826	0.34055	144	3	2.9737
KLHDC3	4	0.92531	0.92546	1	17391	0	1.6523	0.00077367	0.0028133	0.34055	145	2	1.6523
CYYR1	4	0.99654	0.99658	1	18877	0	2.5449	0.00077546	0.0028195	0.34055	146	3	2.5449
EIF4G1	3	0.98577	0.98591	1	18573	0	2.8351	0.00077816	0.0022384	0.295152	147	2	2.8351
EHMT2	4	0.99921	0.99921	1	18997	0	2.1028	0.00079249	0.0028745	0.342853	148	4	2.1028
CCDC88B	4	0.4517	0.55856	1	10407	1	1.7722	0.00080076	0.0029072	0.343815	149	2	1.7722
C20orf27	4	0.9992	0.9992	1	18996	0	2.2748	0.00080415	0.0029186	0.343815	150	4	2.2748
TAMM41	4	0.99919	0.99919	1	18995	0	0.96319	0.00081221	0.0029393	0.344135	151	4	0.96319
MVK	2	0.57735	0.57743	1	11747	0	1.5595	0.00081383	0.0015749	0.273222	152	1	1.5595
SNW1	4	0.46413	0.56479	1	10534	1	1.4896	0.00082708	0.0029912	0.348074	153	2	1.4896
YPEL3	4	0.82137	0.82133	1	15405	0	2.4288	0.00083387	0.0030177	0.349025	154	3	2.4288
PPA1	2	0.027748	0.050896	0.925773	1440	1	1.577	0.00084051	0.0016262	0.275674	155	1	1.577
MRPL11	3	0.20382	0.31514	0.994275	6251	2	-0.58646	0.00086045	0.0024599	0.310898	156	1	-0.58646
MANSC4	4	0.98642	0.98637	1	18591	0	2.4026	0.00087549	0.0031764	0.363714	157	3	2.4026
MTIF3	4	0.98772	0.98771	1	18641	0	2.1602	0.00087905	0.0031951	0.363714	158	2	2.1602
POLG2	4	0.017735	0.051191	0.925773	1033	1	1.462	0.00088043	0.0032018	0.363714	159	2	1.462
WDR11	4	0.9887	0.9887	1	18658	0	2.3075	0.00088794	0.0032273	0.364433	160	3	2.3075
ATP6V1H	4	0.022362	0.061279	0.93556	1227	1	2.0533	0.00091319	0.0033015	0.367453	161	3	2.0533
ABL2	4	0.99908	0.99908	1	18994	0	1.4751	0.00092005	0.0033264	0.367453	162	4	1.4751
SLC39A1	4	0.99908	0.99908	1	18993	0	2.4595	0.00092089	0.003331	0.367453	163	4	2.4595
BPGM	4	0.99907	0.99907	1	18992	0	2.5798	0.00093223	0.0033741	0.370064	164	4	2.5798
CPSF7	4	0.99904	0.99903	1	18991	0	1.658	0.00096322	0.0034815	0.370184	165	4	1.658
MSL3	4	0.97996	0.98004	1	18418	0	2.3179	0.0009675	0.0035007	0.370184	166	3	2.3179
WDR3	2	0.99903	0.99902	1	18990	0	2.8263	0.00096879	0.0018638	0.275674	167	2	2.8263
BTBD16	4	0.99903	0.99903	1	18989	0	1.866	0.00097039	0.0035111	0.370184	168	4	1.866
COA7	4	0.70773	0.71627	1	13442	1	1.8992	0.00097692	0.0035297	0.370184	169	3	1.8992
FAU	4	0.996	0.99599	1	18841	0	1.8992	0.00097692	0.0035297	0.370184	170	3	1.8992
SET	4	0.99848	0.99846	1	18957	0	2.0037	0.00097692	0.0035297	0.370184	171	4	2.0037
ANTXRL	4	0.24856	0.37859	0.996502	7196	1	1.9368	0.00097692	0.0035297	0.370184	172	3	1.9368
GTF2A2	3	0.99902	0.99904	1	18988	0	2.5458	0.00098114	0.0027941	0.34055	173	3	2.5458
EIF4G2	4	0.99902	0.99902	1	18987	0	2.3613	0.00098145	0.0035411	0.370184	174	4	2.3613
FAM60A	4	0.99901	0.99901	1	18986	0	1.4399	0.00098649	0.003564	0.370184	175	4	1.4399
SH3BP2	4	0.47083	0.56819	1	10600	1	0.0054863	0.0009871	0.0035692	0.370184	176	1	0.0054863
CAMK1G	4	0.89228	0.89223	1	16799	0	2.3021	0.00099389	0.0035904	0.370377	177	3	2.3021
HYAL2	4	0.27921	0.41223	1	7777	1	2.3294	0.0010158	0.0036672	0.374941	178	3	2.3294
TMEM208	4	0.99897	0.99895	1	18985	0	1.6402	0.0010344	0.0037414	0.374941	179	4	1.6402
SETDB1	4	0.69003	0.70273	1	13183	1	2.2206	0.0010355	0.0037445	0.374941	180	3	2.2206
MRPS30	4	0.80403	0.80397	1	15067	0	0.57077	0.0010404	0.0037616	0.374941	181	1	0.57077
CABIN1	4	0.99064	0.99063	1	18700	0	2.6736	0.0010459	0.0037902	0.374941	182	3	2.6736
HCFC1R1	4	0.278	0.41089	1	7758	2	1.3097	0.0010557	0.0038275	0.374941	183	2	1.3097
VPS29	2	0.99892	0.99891	1	18984	0	2.7091	0.0010767	0.0020833	0.283934	184	2	2.7091
CCDC6	4	0.9845	0.98449	1	18545	0	2.2551	0.0010827	0.0039256	0.374941	185	3	2.2551
TIPRL	4	0.96381	0.96386	1	18109	0	2.043	0.0010892	0.0039494	0.374941	186	3	2.043
CDK4	4	0.8281	0.82807	1	15511	0	0.70163	0.0010938	0.0039629	0.374941	187	2	0.70163
MED22	4	0.43062	0.54835	1	10193	1	2.2676	0.0011203	0.0040589	0.374941	188	3	2.2676
ATXN3	4	0.99888	0.99886	1	18982	0	1.4847	0.0011214	0.0040615	0.374941	189	4	1.4847
KDM8	4	0.99886	0.99884	1	18979	0	2.2092	0.0011408	0.0041258	0.374941	190	4	2.2092
ANKRD49	4	0.99886	0.99884	1	18977	0	1.331	0.0011408	0.0041258	0.374941	191	4	1.331
RNF149	4	0.99886	0.99884	1	18978	0	1.9717	0.0011408	0.0041258	0.374941	192	4	1.9717
PTCD1	4	0.99886	0.99884	1	18980	0	0.95078	0.0011408	0.0041258	0.374941	193	4	0.95078
RPF1	4	0.99886	0.99884	1	18976	0	1.4299	0.0011408	0.0041258	0.374941	194	4	1.4299
SEH1L	3	0.99757	0.99761	1	18920	0	2.5458	0.0011416	0.0032537	0.365259	195	3	2.5458
SPATA5	2	0.99885	0.99884	1	18975	0	2.9572	0.0011524	0.0022426	0.295152	196	2	2.9572
DPH2	4	0.45389	0.55966	1	10423	1	1.7302	0.0011615	0.0042016	0.378876	197	2	1.7302
MMS19	4	0.98273	0.98275	1	18510	0	1.7263	0.0011632	0.0042089	0.378876	198	3	1.7263
PRPF40B	4	0.99882	0.9988	1	18973	0	1.6308	0.0011835	0.0042737	0.379346	199	4	1.6308
FANCL	4	0.99882	0.9988	1	18974	0	1.6897	0.0011835	0.0042737	0.379346	200	4	1.6897
WRAP53	4	0.9988	0.99879	1	18971	0	1.8131	0.0011955	0.0043142	0.381165	201	4	1.8131
C17orf89	4	0.9725	0.97264	1	18259	0	1.9687	0.0012135	0.0043827	0.38286	202	3	1.9687
ZBTB17	4	0.99876	0.99874	1	18970	0	0.28863	0.001241	0.0044771	0.38286	203	4	0.28863
C21orf59	4	0.079275	0.17591	0.971423	3377	1	1.8491	0.0012537	0.0045129	0.38286	204	3	1.8491
TRMT6	4	0.57215	0.62363	1	11690	1	1.1884	0.0012538	0.0045139	0.38286	205	2	1.1884
DBF4	4	0.85954	0.8594	1	16150	0	1.8359	0.0012768	0.0045964	0.387774	206	2	1.8359
UBE2G2	4	0.99872	0.9987	1	18969	0	1.9826	0.001282	0.0046125	0.387774	207	4	1.9826
PPAPDC3	4	0.9987	0.99868	1	18968	0	1.7533	0.0012961	0.0046587	0.389706	208	4	1.7533
MCM2	4	0.9987	0.99868	1	18967	0	1.2604	0.0013016	0.0046763	0.389706	209	4	1.2604
HIRA	4	0.99865	0.99862	1	18966	0	1.5584	0.0013489	0.0048351	0.39841	210	4	1.5584
RNASEH1	4	0.42786	0.54703	1	10175	1	1.8443	0.0013568	0.0048636	0.39841	211	3	1.8443
INTS4	4	0.19658	0.32129	0.995653	6112	1	1.3682	0.0013604	0.0048781	0.39841	212	3	1.3682
NMD3	4	0.99863	0.9986	1	18965	0	1.4033	0.0013691	0.0049015	0.39841	213	4	1.4033
ZRSR2	4	0.31718	0.45395	1	8525	1	2.1173	0.0013741	0.0049222	0.39841	214	3	2.1173
SLC25A51	3	0.49535	0.52443	1	10858	1	2.8628	0.0013945	0.0039328	0.374941	215	2	2.8628
UBE2K	4	0.99861	0.99857	1	18964	0	1.5844	0.0013949	0.0049933	0.401626	216	4	1.5844
SLIT1	4	0.67267	0.68986	1	12948	1	1.5146	0.0013986	0.0050099	0.401626	217	2	1.5146
CHEK1	3	0.9986	0.99864	1	18963	0	2.1836	0.0013993	0.0039443	0.374941	218	3	2.1836
NOP10	3	0.9986	0.99864	1	18962	0	1.7539	0.0013993	0.0039443	0.374941	219	3	1.7539
NCOA5	4	0.16036	0.28123	0.990226	5368	1	0.40757	0.0014137	0.0050618	0.401626	220	1	0.40757
GPR89A	4	0.99858	0.99855	1	18961	0	1.0918	0.0014197	0.0050831	0.401626	221	4	1.0918
CDK5	4	0.99353	0.99356	1	18774	0	1.7263	0.0014375	0.0051479	0.401626	222	3	1.7263
COPE	4	0.98772	0.98771	1	18635	0	1.7421	0.0014375	0.0051479	0.401626	223	3	1.7421
C9orf9	4	0.92731	0.92747	1	17424	0	2.1944	0.0014432	0.0051629	0.401626	224	2	2.1944
DPY30	3	0.99506	0.99519	1	18821	0	2.5458	0.0014486	0.0040781	0.374941	225	3	2.5458
PRKAG1	4	0.68191	0.69668	1	13059	1	2.1261	0.0014493	0.0051832	0.401626	226	3	2.1261
BUD31	3	0.00069563	0.0020049	0.617101	69	2	-2.0552	0.0014605	0.0041139	0.374941	227	1	-2.0552
ZNRD1	3	0.69898	0.69902	1	13305	0	0.29821	0.0014605	0.0041139	0.374941	228	1	0.29821
NUP160	3	0.84189	0.8419	1	15782	0	0.73212	0.0014605	0.0041139	0.374941	229	1	0.73212
PPIAL4E	1	0.99854	0.99858	1	18960	0	4.019	0.0014612	0.0014363	0.273222	230	1	4.019
ZNF93	4	0.97398	0.97412	1	18278	0	1.466	0.0014671	0.0052403	0.401626	231	3	1.466
MKLN1	4	0.99852	0.99849	1	18959	0	1.3734	0.001476	0.0052703	0.402317	232	4	1.3734
MED6	3	0.99849	0.99853	1	18958	0	1.8154	0.0015095	0.0042613	0.379346	233	3	1.8154
SNRNP35	4	0.99844	0.99842	1	18953	0	1.3133	0.0015643	0.0055821	0.41513	234	4	1.3133
TMEM145	4	0.99844	0.99842	1	18954	0	1.5887	0.0015643	0.0055821	0.41513	235	4	1.5887
METTL14	4	0.99844	0.99842	1	18955	0	1.3409	0.0015643	0.0055821	0.41513	236	4	1.3409
ENHO	4	0.45184	0.55863	1	10409	1	0.88765	0.0015737	0.0056169	0.41513	237	2	0.88765
EXOSC3	3	0.049288	0.10534	0.96183	2285	1	1.2261	0.0015805	0.004474	0.38286	238	2	1.2261
DPM1	4	0.99838	0.99836	1	18952	0	1.9902	0.0016196	0.0057824	0.41513	239	4	1.9902
OR4F16	4	0.99323	0.99326	1	18764	0	2.2721	0.0016338	0.0058441	0.41513	240	3	2.2721
USP17L19	4	0.86796	0.86786	1	16344	0	1.7523	0.0016338	0.0058441	0.41513	241	3	1.7523
HDAC1	4	0.99836	0.99834	1	18951	0	2.1369	0.0016445	0.0058742	0.41513	242	4	2.1369
LIG4	4	0.99833	0.99832	1	18950	0	1.2412	0.0016653	0.0059406	0.41513	243	4	1.2412
PVRL1	4	0.98828	0.98828	1	18647	0	2.1492	0.0016728	0.005964	0.41513	244	3	2.1492
SCYL1	4	0.9983	0.99829	1	18949	0	1.4704	0.001697	0.0060512	0.41513	245	4	1.4704
CARD9	4	0.98108	0.9811	1	18453	0	2.0947	0.0016999	0.0060615	0.41513	246	3	2.0947
SGPL1	4	0.85093	0.85082	1	15983	0	2.4375	0.0017051	0.0060776	0.41513	247	3	2.4375
NFIX	4	0.11604	0.23188	0.984631	4441	1	2.3752	0.0017086	0.0060885	0.41513	248	3	2.3752
UFL1	4	0.96718	0.96722	1	18160	0	2.8013	0.0017305	0.00617	0.41513	249	3	2.8013
FAM199X	4	0.33295	0.4712	1	8835	2	-0.11794	0.0017336	0.0061788	0.41513	250	1	-0.11794
SUV39H1	4	0.72358	0.72915	1	13690	1	2.0843	0.0017347	0.0061824	0.41513	251	3	2.0843
GMEB1	4	0.9845	0.98449	1	18544	0	1.8388	0.0017347	0.0061824	0.41513	252	2	1.8388
MTHFS	4	0.54995	0.61067	1	11432	1	1.6236	0.0017347	0.0061824	0.41513	253	2	1.6236
NQO1	4	0.99826	0.99826	1	18948	0	1.9546	0.0017364	0.0061871	0.41513	254	4	1.9546
RB1CC1	4	0.55561	0.61395	1	11504	1	2.4429	0.0017406	0.0062032	0.41513	255	3	2.4429
HIST2H2AA4	3	0.70415	0.70424	1	13387	0	2.6463	0.0017427	0.0049269	0.39841	256	2	2.6463
BACH2	4	0.99826	0.99825	1	18947	0	1.7635	0.0017432	0.0062135	0.41513	257	4	1.7635
AMY1A	4	0.99823	0.99822	1	18946	0	2.3745	0.0017728	0.0063168	0.41513	258	4	2.3745
NDUFAF3	4	0.0047687	0.016573	0.845624	353	1	1.7595	0.0017762	0.0063308	0.41513	259	3	1.7595
ANPEP	4	0.68553	0.69938	1	13116	1	1.8562	0.0017802	0.0063458	0.41513	260	2	1.8562
EIF5AL1	4	0.028801	0.074925	0.944682	1488	1	0.76576	0.0017869	0.0063676	0.41513	261	2	0.76576
TRIM49	3	0.85114	0.85114	1	15987	0	3.2429	0.0017876	0.0050545	0.401626	262	2	3.2429
BIRC6	4	0.98926	0.98924	1	18674	0	2.1471	0.0017883	0.0063692	0.41513	263	3	2.1471
ZNF479	4	0.9025	0.90251	1	16981	0	2.3019	0.0017959	0.0063894	0.41513	264	3	2.3019
TTC34	3	0.97582	0.97601	1	18313	0	2.5458	0.001803	0.0050965	0.401626	265	2	2.5458
FRG2B	4	0.99819	0.99818	1	18945	0	1.4811	0.0018146	0.0064454	0.41513	266	4	1.4811
UBE4B	4	0.99817	0.99816	1	18944	0	2.1695	0.0018304	0.0065082	0.41513	267	4	2.1695
HSPA9	1	0.99817	0.99818	1	18943	0	3.8987	0.0018348	0.0018078	0.275674	268	1	3.8987
CPSF3	1	0.99817	0.99818	1	18942	0	3.8987	0.0018348	0.0018078	0.275674	269	1	3.8987
THSD7A	4	0.99401	0.99406	1	18788	0	2.2701	0.0018382	0.0065378	0.41513	270	3	2.2701
DNAJA4	4	0.9981	0.9981	1	18941	0	1.5699	0.0019009	0.0067713	0.41513	271	4	1.5699
ZNF91	4	0.99809	0.99809	1	18940	0	1.6783	0.0019096	0.0068086	0.41513	272	4	1.6783
VOPP1	4	0.19776	0.32256	0.995653	6130	2	0.10155	0.0019468	0.0069316	0.419943	273	2	0.10155
CHTF18	4	0.40545	0.53648	1	9978	1	0.24042	0.0019468	0.0069316	0.419943	274	1	0.24042
NUP93	2	0.98749	0.98749	1	18617	0	2.8531	0.0019873	0.0038955	0.374941	275	2	2.8531
NOP56	2	0.99801	0.99797	1	18939	0	2.4928	0.0019942	0.0039079	0.374941	276	2	2.4928
MTRF1L	3	0.998	0.99806	1	18938	0	2.5458	0.0019983	0.0056314	0.41513	277	3	2.5458
CLEC4D	4	0.4219	0.5442	1	10120	1	1.4497	0.002025	0.0072206	0.43132	278	2	1.4497
ADCY4	4	0.92356	0.92374	1	17355	0	2.3124	0.0020305	0.0072429	0.43132	279	3	2.3124
MINOS1	4	0.9722	0.97234	1	18253	0	2.1883	0.0020351	0.0072615	0.43132	280	3	2.1883
COPS2	3	0.87018	0.87028	1	16387	0	0.96319	0.0020403	0.0057469	0.41513	281	2	0.96319
SEC61A1	3	0.9106	0.91071	1	17126	0	1.7539	0.0020403	0.0057469	0.41513	282	2	1.7539
MBTPS2	4	0.94117	0.94125	1	17723	0	2.2197	0.0020423	0.0072885	0.43132	283	3	2.2197
BRCA1	4	0.99795	0.99795	1	18936	0	1.0045	0.0020511	0.0073186	0.43132	284	4	1.0045
SEL1L	4	0.88108	0.88105	1	16590	0	1.7869	0.0020524	0.0073228	0.43132	285	2	1.7869
KIAA0368	4	0.95186	0.95192	1	17905	0	1.7327	0.0020886	0.0074587	0.435477	286	2	1.7327
USP17L3	4	0.63916	0.66638	1	12485	1	2.0915	0.0020902	0.0074618	0.435477	287	3	2.0915
SCAP	4	0.14376	0.26275	0.988221	5021	1	2.0594	0.0021287	0.0076112	0.440159	288	3	2.0594
SNX30	4	0.99785	0.99785	1	18935	0	1.1847	0.0021528	0.0076973	0.442401	289	4	1.1847
BOLA2	4	0.090163	0.19641	0.971734	3796	1	0.62258	0.00216	0.0077222	0.442401	290	1	0.62258
SELE	4	0.99783	0.99783	1	18934	0	2.2675	0.0021704	0.0077606	0.442401	291	4	2.2675
DENR	4	0.78399	0.78387	1	14703	1	0.66761	0.0022133	0.0079163	0.442401	292	2	0.66761
ACTR5	4	0.99776	0.99777	1	18933	0	2.1469	0.002238	0.0080123	0.442401	293	4	2.1469
SNRPD1	4	0.99776	0.99777	1	18932	0	0.93949	0.002238	0.0080123	0.442401	294	4	0.93949
MRPL52	2	0.97672	0.97683	1	18340	0	1.7576	0.0022406	0.004407	0.38286	295	2	1.7576
UROS	4	0.66076	0.68134	1	12783	1	1.6274	0.0022533	0.0080673	0.442401	296	2	1.6274
ATXN10	4	0.70773	0.71627	1	13441	1	1.709	0.0022533	0.0080673	0.442401	297	2	1.709
XRCC6	4	0.083332	0.18357	0.971423	3535	1	0.96552	0.0022533	0.0080673	0.442401	298	3	0.96552
DOLK	4	0.45901	0.56227	1	10482	1	1.5396	0.0022533	0.0080673	0.442401	299	2	1.5396
WDR24	4	0.0051941	0.017965	0.848368	390	2	0.74682	0.0022533	0.0080673	0.442401	300	2	0.74682
DNAJC2	4	0.2477	0.37764	0.996502	7180	1	1.7545	0.0022533	0.0080673	0.442401	301	3	1.7545
PITX1	4	0.7097	0.71779	1	13473	1	2.1726	0.0022869	0.0081798	0.446379	302	3	2.1726
SYDE1	4	0.99771	0.99772	1	18931	0	1.2638	0.0022884	0.0081866	0.446379	303	4	1.2638
HIST2H2AC	4	0.77654	0.77644	1	14555	1	2.2664	0.0023199	0.0082986	0.448644	304	3	2.2664
RPTOR	4	0.16599	0.28751	0.991181	5487	1	0.10286	0.0023199	0.0082986	0.448644	305	1	0.10286
HMBS	4	0.36137	0.50246	1	9384	1	0.95856	0.0023199	0.0082986	0.448644	306	2	0.95856
RRP15	3	0.23948	0.36099	0.995653	7013	1	-0.2582	0.0023401	0.0065648	0.41513	307	1	-0.2582
OR52K1	4	0.99765	0.99765	1	18930	0	1.4699	0.0023476	0.0083957	0.451332	308	4	1.4699
AKAP8	4	0.99763	0.99763	1	18929	0	1.9314	0.0023653	0.0084543	0.452631	309	4	1.9314
KDM3B	4	0.93192	0.93203	1	17518	0	2.1322	0.0023707	0.0084673	0.452631	310	3	2.1322
ZMYM6	4	0.41284	0.53993	1	10046	1	2.3247	0.0023999	0.0085705	0.45687	311	3	2.3247
ECSIT	4	0.71163	0.71932	1	13507	1	1.3839	0.0024162	0.0086234	0.45841	312	3	1.3839
DKC1	3	0.99757	0.99761	1	18919	0	1.6988	0.0024297	0.0067905	0.41513	313	3	1.6988
EIF5	3	0.99757	0.99761	1	18912	0	2.1929	0.0024297	0.0067905	0.41513	314	3	2.1929
PMVK	3	0.99757	0.99761	1	18915	0	1.6988	0.0024297	0.0067905	0.41513	315	3	1.6988
DDX55	3	0.99757	0.99761	1	18917	0	1.4522	0.0024297	0.0067905	0.41513	316	3	1.4522
PGLS	3	0.99757	0.99761	1	18928	0	2.1836	0.0024297	0.0067905	0.41513	317	3	2.1836
INO80	3	0.99757	0.99761	1	18925	0	1.3991	0.0024297	0.0067905	0.41513	318	3	1.3991
BRF2	3	0.99757	0.99761	1	18916	0	1.7539	0.0024297	0.0067905	0.41513	319	3	1.7539
SEPTIN7	3	0.99757	0.99761	1	18923	0	1.6714	0.0024297	0.0067905	0.41513	320	3	1.6714
RPS12	3	0.99757	0.99761	1	18918	0	0.96319	0.0024297	0.0067905	0.41513	321	3	0.96319
DLST	3	0.99757	0.99761	1	18914	0	1.7539	0.0024297	0.0067905	0.41513	322	3	1.7539
NDUFB7	3	0.99757	0.99761	1	18911	0	2.0747	0.0024297	0.0067905	0.41513	323	3	2.0747
CCNC	3	0.99757	0.99761	1	18922	0	2.1836	0.0024297	0.0067905	0.41513	324	3	2.1836
CSE1L	3	0.99757	0.99761	1	18927	0	0.96319	0.0024297	0.0067905	0.41513	325	3	0.96319
FAM50A	3	0.99757	0.99761	1	18924	0	0.96319	0.0024297	0.0067905	0.41513	326	3	0.96319
STRAP	3	0.99757	0.99761	1	18913	0	1.8059	0.0024297	0.0067905	0.41513	327	3	1.8059
NOL7	3	0.99757	0.99761	1	18926	0	2.0113	0.0024297	0.0067905	0.41513	328	3	2.0113
PTCD3	3	0.99757	0.99761	1	18921	0	1.5166	0.0024297	0.0067905	0.41513	329	3	1.5166
CCDC144NL	4	0.2127	0.33916	0.995653	6445	1	1.4432	0.0024382	0.0087038	0.459089	330	2	1.4432
RPL26	2	0.97672	0.97683	1	18352	0	2.0217	0.0024405	0.004778	0.396449	331	2	2.0217
RRAGA	4	0.9975	0.9975	1	18910	0	1.0947	0.0024965	0.0089046	0.459089	332	4	1.0947
TNPO3	4	0.76293	0.76352	1	14325	1	1.8298	0.0025323	0.0090125	0.459089	333	3	1.8298
C17orf67	4	0.29188	0.42611	1	8041	2	-0.23666	0.002533	0.0090136	0.459089	334	1	-0.23666
DZIP1L	4	0.2431	0.3725	0.995958	7095	2	1.2999	0.0025333	0.0090151	0.459089	335	2	1.2999
ASH2L	3	0.45829	0.49794	1	10473	1	-0.0099786	0.0025399	0.0070929	0.427008	336	1	-0.0099786
HNRNPU	3	0.0075847	0.020567	0.866803	535	2	-1.6547	0.0025399	0.0070929	0.427008	337	1	-1.6547
DNASE1	4	0.39259	0.53051	1	9871	1	-0.059089	0.0025863	0.0091832	0.459089	338	1	-0.059089
CLIP4	4	0.99741	0.99741	1	18909	0	1.8531	0.0025884	0.009191	0.459089	339	4	1.8531
BUB1	4	0.66468	0.68406	1	12848	1	1.6988	0.0025965	0.0092258	0.459089	340	3	1.6988
SNX14	4	0.51119	0.58923	1	11044	1	1.9391	0.0026106	0.0092704	0.459089	341	2	1.9391
SACM1L	3	0.99735	0.99739	1	18906	0	1.4182	0.0026494	0.0073923	0.434075	342	3	1.4182
TBL1Y	4	0.96986	0.96991	1	18209	0	2.4704	0.002653	0.00937	0.459089	343	3	2.4704
GNB2L1	2	0.99734	0.99729	1	18905	0	2.5819	0.0026607	0.0052262	0.401626	344	2	2.5819
G6PD	2	0.99734	0.99729	1	18904	0	2.1292	0.0026607	0.0052262	0.401626	345	2	2.1292
ZFP69	4	0.68646	0.70008	1	13133	1	2.59	0.0026759	0.0094213	0.459089	346	3	2.59
CD6	4	0.99738	0.99738	1	18907	0	2.4672	0.0026792	0.0094297	0.459089	347	3	2.4672
PPDPF	4	0.24338	0.3728	0.996296	7100	1	2.0585	0.0026851	0.0094421	0.459089	348	3	2.0585
ATM	4	0.98095	0.98099	1	18449	0	2.4649	0.0027062	0.0094987	0.459089	349	3	2.4649
CDAN1	3	0.99729	0.99734	1	18901	0	1.5408	0.0027065	0.0075386	0.437284	350	3	1.5408
RPL34	1	0.99727	0.9973	1	18900	0	3.9897	0.0027289	0.0026919	0.337184	351	1	3.9897
PKM	4	0.87483	0.8748	1	16488	0	1.7545	0.0027487	0.0096154	0.459089	352	3	1.7545
MCM5	4	0.94404	0.94415	1	17778	0	1.7167	0.0027487	0.0096154	0.459089	353	2	1.7167
POTEB2	4	0.23769	0.36667	0.995653	6971	2	1.0558	0.0027487	0.0096154	0.459089	354	2	1.0558
MED14	4	0.62396	0.65625	1	12298	1	1.5396	0.0027487	0.0096154	0.459089	355	2	1.5396
RCL1	2	0.083094	0.1432	0.971423	3524	1	1.3301	0.0027603	0.0054021	0.410733	356	1	1.3301
COASY	4	0.027468	0.072114	0.944682	1425	1	1.1442	0.0028257	0.009825	0.459089	357	2	1.1442
PAICS	3	0.48706	0.51834	1	10767	1	2.1836	0.002846	0.0079256	0.442401	358	2	2.1836
RNMTL1	3	0.38672	0.45015	1	9815	1	2.1836	0.002846	0.0079256	0.442401	359	2	2.1836
KAT7	3	0.95169	0.95197	1	17901	0	2.1836	0.002846	0.0079256	0.442401	360	2	2.1836
RGP1	3	0.83015	0.83012	1	15555	0	2.1836	0.002846	0.0079256	0.442401	361	2	2.1836
MFN2	3	0.89417	0.89425	1	16834	0	2.1836	0.002846	0.0079256	0.442401	362	2	2.1836
FOXK2	4	0.089541	0.19527	0.971734	3774	1	2.3303	0.0028474	0.0098841	0.459866	363	3	2.3303
SLC4A7	4	0.018657	0.053224	0.925773	1075	1	1.7677	0.0028545	0.0099038	0.459866	364	2	1.7677
INTS2	3	0.99713	0.99717	1	18895	0	1.3552	0.0028699	0.0079941	0.442401	365	3	1.3552
RPL39	1	0.99711	0.99714	1	18894	0	4.5124	0.002889	0.0028532	0.342456	366	1	4.5124
HIST1H2BF	4	0.77355	0.77354	1	14503	1	1.77	0.0028908	0.0099967	0.461422	367	3	1.77
SURF6	4	0.5044	0.58565	1	10952	1	1.7424	0.0028908	0.0099967	0.461422	368	3	1.7424
PRPF4B	4	0.99246	0.99248	1	18748	0	2.0658	0.0028981	0.010012	0.461422	369	3	2.0658
ANXA9	4	0.98062	0.98068	1	18431	0	1.7682	0.0029059	0.010034	0.461422	370	3	1.7682
LSM5	2	0.99686	0.99683	1	18886	0	2.8589	0.0029202	0.0057186	0.41513	371	2	2.8589
EAPP	4	0.93077	0.9309	1	17494	0	1.7524	0.0029408	0.010131	0.463964	372	3	1.7524
LYRM7	4	0.12298	0.2396	0.986322	4582	2	1.1536	0.0029588	0.010174	0.463964	373	2	1.1536
TMEM70	4	0.53906	0.60451	1	11323	1	0.36819	0.0029591	0.010174	0.463964	374	1	0.36819
VPS13D	3	0.99699	0.99703	1	18891	0	1.5046	0.003012	0.00839	0.451332	375	3	1.5046
OR11H1	4	0.086936	0.19036	0.971734	3682	2	0.85636	0.0030125	0.010312	0.467945	376	2	0.85636
GID4	4	0.87433	0.8743	1	16480	0	1.7071	0.0030177	0.010323	0.467945	377	2	1.7071
RRM1	2	0.78471	0.78413	1	14720	0	2.3925	0.0030268	0.0059173	0.41513	378	1	2.3925
MBTPS1	4	0.92614	0.9263	1	17402	0	1.8734	0.0030463	0.010386	0.469675	379	3	1.8734
VPS45	4	0.94994	0.94999	1	17865	0	1.2402	0.0030656	0.010425	0.47032	380	3	1.2402
GOLPH3	4	0.1769	0.29954	0.994247	5696	2	1.1484	0.003123	0.010569	0.474419	381	2	1.1484
RPAIN	2	0.99686	0.99683	1	18883	0	2.0214	0.0031448	0.0061477	0.41513	382	2	2.0214
SPDYE2B	2	0.99686	0.99683	1	18884	0	2.3874	0.0031448	0.0061477	0.41513	383	2	2.3874
CSNK2B	2	0.99686	0.99683	1	18887	0	2.2916	0.0031448	0.0061477	0.41513	384	2	2.2916
RPS4X	2	0.99686	0.99683	1	18889	0	2.0986	0.0031448	0.0061477	0.41513	385	2	2.0986
MTERF4	2	0.99686	0.99683	1	18885	0	2.5772	0.0031448	0.0061477	0.41513	386	2	2.5772
MCM3	2	0.99686	0.99683	1	18888	0	2.2669	0.0031448	0.0061477	0.41513	387	2	2.2669
MED15	4	0.64353	0.66937	1	12540	1	2.3825	0.003155	0.010655	0.474419	388	3	2.3825
CSMD2	4	0.87621	0.8762	1	16511	0	0.11846	0.0031721	0.010705	0.474419	389	1	0.11846
FNIP1	4	0.87943	0.87946	1	16561	0	1.6383	0.003205	0.010783	0.474419	390	2	1.6383
PLGLB1	4	0.79112	0.79104	1	14838	0	1.7569	0.003205	0.010783	0.474419	391	2	1.7569
C9orf78	4	0.81897	0.81894	1	15360	0	1.3424	0.003205	0.010783	0.474419	392	2	1.3424
RAB3GAP1	4	0.27956	0.41264	1	7782	1	1.999	0.003205	0.010783	0.474419	393	3	1.999
COX6C	4	0.92805	0.92823	1	17447	0	1.4097	0.003205	0.010783	0.474419	394	3	1.4097
WDR25	4	0.84334	0.84322	1	15811	0	2.1354	0.0032269	0.010839	0.474419	395	3	2.1354
PGAM1	4	0.70773	0.71627	1	13444	1	1.8356	0.0032269	0.010839	0.474419	396	3	1.8356
PHC1	4	0.21245	0.33887	0.995653	6442	1	2.182	0.0032269	0.010839	0.474419	397	3	2.182
EIF2B2	3	0.96205	0.96227	1	18056	0	2.5219	0.0032297	0.0089544	0.459089	398	2	2.5219
WDR33	3	0.37814	0.44459	1	9711	1	2.5219	0.0032297	0.0089544	0.459089	399	2	2.5219
PDE11A	4	0.061792	0.14195	0.971423	2743	1	2.4038	0.003297	0.011011	0.477221	400	3	2.4038
TMEM30A	4	0.58939	0.63423	1	11888	1	2.0675	0.0033073	0.011032	0.477221	401	3	2.0675
SLC44A2	4	0.94979	0.94984	1	17863	0	1.7875	0.003317	0.011056	0.477221	402	2	1.7875
KDM4A	4	0.17214	0.29436	0.994247	5604	1	1.8724	0.0033262	0.011078	0.477221	403	2	1.8724
LAMA2	3	0.94391	0.94412	1	17770	0	2.9643	0.0033307	0.0092356	0.459089	404	2	2.9643
GRIK4	4	0.99457	0.99459	1	18800	0	2.0527	0.0033342	0.011101	0.477221	405	3	2.0527
PARD6G	4	0.39669	0.53242	1	9906	1	1.6362	0.003339	0.01111	0.477221	406	2	1.6362
SNAP23	3	0.97489	0.97506	1	18292	0	2.2071	0.003359	0.0093103	0.459089	407	2	2.2071
PPP1R8	3	0.98765	0.98781	1	18619	0	0.96319	0.003359	0.0093103	0.459089	408	2	0.96319
RIMS2	4	0.55381	0.61291	1	11483	1	2.2313	0.0033836	0.011225	0.477221	409	3	2.2313
RSBN1L	4	0.99725	0.99725	1	18899	0	2.0363	0.0033836	0.011225	0.477221	410	3	2.0363
ZNF480	4	0.34026	0.47935	1	8984	1	1.2221	0.0033851	0.011228	0.477221	411	2	1.2221
PPM1D	4	0.82642	0.82639	1	15488	0	1.6841	0.0033851	0.011228	0.477221	412	2	1.6841
SYCE2	4	0.81099	0.81092	1	15188	0	1.3274	0.0033851	0.011228	0.477221	413	2	1.3274
EMX1	4	0.74289	0.74542	1	13988	1	0.97549	0.0033851	0.011228	0.477221	414	2	0.97549
CAPN9	4	0.25579	0.38647	0.997035	7347	1	0.75174	0.0033851	0.011228	0.477221	415	1	0.75174
GZMA	4	0.32709	0.46479	1	8719	1	1.0157	0.0034291	0.011345	0.477947	416	3	1.0157
XRCC4	4	0.94994	0.94999	1	17864	0	1.9003	0.0034291	0.011345	0.477947	417	3	1.9003
MGA	4	0.9948	0.9948	1	18806	0	1.8047	0.0034291	0.011345	0.477947	418	3	1.8047
PIFO	4	0.91161	0.9116	1	17142	0	1.3113	0.0034291	0.011345	0.477947	419	2	1.3113
SURF1	4	0.93426	0.93436	1	17566	0	1.844	0.0034894	0.011491	0.481419	420	3	1.844
BCL2L12	4	0.40103	0.53448	1	9941	1	1.9311	0.0035082	0.011534	0.481419	421	3	1.9311
PRSS58	4	0.97351	0.97366	1	18267	0	2.0862	0.0035111	0.011542	0.481419	422	3	2.0862
ABHD11	4	0.98087	0.98092	1	18446	0	1.8943	0.0035158	0.011554	0.481419	423	3	1.8943
FAM58A	4	0.97932	0.97945	1	18406	0	1.9529	0.003528	0.011584	0.48158	424	2	1.9529
POLR3B	3	0.99645	0.99653	1	18852	0	0.96319	0.0035529	0.009839	0.459089	425	3	0.96319
DCPS	3	0.99645	0.99653	1	18866	0	0.96319	0.0035529	0.009839	0.459089	426	3	0.96319
BTF3	3	0.99645	0.99653	1	18851	0	1.6988	0.0035529	0.009839	0.459089	427	3	1.6988
SMC3	3	0.99645	0.99653	1	18850	0	-0.61478	0.0035529	0.009839	0.459089	428	3	-0.61478
CPSF3L	3	0.99645	0.99653	1	18871	0	1.6988	0.0035529	0.009839	0.459089	429	3	1.6988
RPAP1	3	0.99645	0.99653	1	18870	0	-0.61478	0.0035529	0.009839	0.459089	430	3	-0.61478
UBE2D3	3	0.99645	0.99653	1	18847	0	-0.61478	0.0035529	0.009839	0.459089	431	3	-0.61478
DDX47	3	0.99645	0.99653	1	18869	0	-0.61478	0.0035529	0.009839	0.459089	432	3	-0.61478
CCT5	3	0.99645	0.99653	1	18865	0	0.96319	0.0035529	0.009839	0.459089	433	3	0.96319
XAB2	3	0.99645	0.99653	1	18853	0	1.7539	0.0035529	0.009839	0.459089	434	3	1.7539
TRRAP	3	0.99645	0.99653	1	18848	0	-0.61478	0.0035529	0.009839	0.459089	435	3	-0.61478
NMNAT1	3	0.99645	0.99653	1	18854	0	2.1836	0.0035529	0.009839	0.459089	436	3	2.1836
MRPL16	3	0.99645	0.99653	1	18861	0	1.2901	0.0035529	0.009839	0.459089	437	3	1.2901
MVD	3	0.99645	0.99653	1	18857	0	1.4967	0.0035529	0.009839	0.459089	438	3	1.4967
TCEB1	3	0.99645	0.99653	1	18858	0	0.96319	0.0035529	0.009839	0.459089	439	3	0.96319
TAF2	3	0.99645	0.99653	1	18873	0	-0.61478	0.0035529	0.009839	0.459089	440	3	-0.61478
EIF2B3	3	0.99645	0.99653	1	18855	0	1.8171	0.0035529	0.009839	0.459089	441	3	1.8171
PAM16	3	0.99645	0.99653	1	18862	0	-0.61478	0.0035529	0.009839	0.459089	442	3	-0.61478
NUDT21	3	0.99645	0.99653	1	18867	0	0.96319	0.0035529	0.009839	0.459089	443	3	0.96319
KIF11	3	0.99645	0.99653	1	18863	0	-0.61478	0.0035529	0.009839	0.459089	444	3	-0.61478
KANSL1	3	0.99645	0.99653	1	18856	0	0.96319	0.0035529	0.009839	0.459089	445	3	0.96319
UBE2M	3	0.99645	0.99653	1	18860	0	1.3484	0.0035529	0.009839	0.459089	446	3	1.3484
USP17L26	3	0.99645	0.99653	1	18849	0	1.7854	0.0035529	0.009839	0.459089	447	3	1.7854
UBE2I	3	0.99645	0.99653	1	18859	0	-0.61478	0.0035529	0.009839	0.459089	448	3	-0.61478
SF3B1	3	0.99645	0.99653	1	18868	0	-0.61478	0.0035529	0.009839	0.459089	449	3	-0.61478
ICT1	3	0.99645	0.99653	1	18864	0	-0.61478	0.0035529	0.009839	0.459089	450	3	-0.61478
KLHL5	4	0.92647	0.92664	1	17407	0	1.7124	0.0035543	0.011637	0.48158	451	2	1.7124
PRDM10	4	0.25482	0.38538	0.997035	7322	2	1.2874	0.0035581	0.011651	0.48158	452	2	1.2874
IL13RA2	4	0.94944	0.94948	1	17857	0	2.103	0.0035618	0.011658	0.48158	453	3	2.103
ANKRD28	4	0.76095	0.76169	1	14286	1	1.8581	0.003577	0.011694	0.481596	454	2	1.8581
BNIPL	4	0.094506	0.20452	0.974335	3944	2	0.23606	0.0035981	0.011745	0.482019	455	2	0.23606
DCAF15	4	0.99185	0.99188	1	18725	0	1.8849	0.0036321	0.011842	0.484863	456	3	1.8849
DSTYK	4	0.79529	0.79522	1	14918	0	1.4612	0.0036415	0.011867	0.484863	457	2	1.4612
SRSF7	2	0.80221	0.80171	1	15038	0	2.039	0.0036663	0.0071282	0.427782	458	1	2.039
CCT8	4	0.99721	0.99722	1	18897	0	1.522	0.0037045	0.012022	0.488129	459	3	1.522
NRD1	4	0.026449	0.069948	0.944682	1385	1	1.314	0.0037297	0.012081	0.488161	460	2	1.314
NDUFB10	4	0.65943	0.6804	1	12761	1	1.6988	0.0037515	0.012135	0.488161	461	3	1.6988
ATXN7L3	4	0.1579	0.27853	0.990226	5311	1	2.1494	0.0037568	0.012147	0.488161	462	3	2.1494
EIF3E	4	0.93426	0.93436	1	17572	0	0.5168	0.0037578	0.01215	0.488161	463	2	0.5168
PARD6B	4	0.94394	0.94406	1	17777	0	2.0418	0.0037822	0.012213	0.489631	464	3	2.0418
EPO	4	0.27445	0.40694	1	7689	2	0.21494	0.003811	0.012273	0.490627	465	2	0.21494
OR1L1	4	0.76088	0.76164	1	14285	1	1.779	0.0038173	0.012289	0.490627	466	3	1.779
RPL7L1	3	0.99616	0.99624	1	18845	0	2.0747	0.0038439	0.010619	0.474419	467	3	2.0747
AP2B1	4	0.23342	0.36194	0.995653	6877	2	-0.14124	0.0038642	0.012413	0.490924	468	1	-0.14124
SLC25A4	4	0.21692	0.34384	0.995653	6527	2	1.0684	0.0038816	0.012453	0.490924	469	2	1.0684
RFK	3	0.99612	0.99621	1	18844	0	1.3053	0.0038838	0.010724	0.474419	470	3	1.3053
TRIM36	4	0.77358	0.77357	1	14505	1	0.95197	0.0039174	0.012534	0.490924	471	2	0.95197
GATC	4	0.083982	0.18478	0.971423	3568	1	1.1874	0.0039191	0.012538	0.490924	472	3	1.1874
GSTA3	4	0.021312	0.059006	0.93556	1178	1	2.0651	0.0039497	0.012612	0.490924	473	3	2.0651
ICE1	4	0.10182	0.21594	0.976305	4159	2	0.94491	0.0039666	0.012651	0.490924	474	2	0.94491
PUS1	4	0.97539	0.97556	1	18305	0	1.9646	0.0039666	0.012651	0.490924	475	3	1.9646
METTL1	4	0.93388	0.93395	1	17563	0	2.1774	0.0039666	0.012651	0.490924	476	3	2.1774
ABHD5	4	0.17914	0.30204	0.994247	5749	1	1.9083	0.0039859	0.012702	0.490924	477	3	1.9083
RNPEP	4	0.7281	0.73287	1	13764	1	1.8769	0.0040192	0.0128	0.490924	478	3	1.8769
TMPRSS11A	4	0.48865	0.57737	1	10788	1	0.16353	0.0040239	0.012811	0.490924	479	1	0.16353
TOB2	4	0.98368	0.98367	1	18523	0	1.92	0.0040474	0.012869	0.492163	480	3	1.92
RABGEF1	4	0.84045	0.84034	1	15741	0	0.27593	0.0040771	0.012945	0.492599	481	1	0.27593
SLC30A5	4	0.84231	0.84219	1	15795	0	1.5097	0.0040948	0.012996	0.492599	482	2	1.5097
ZFX	4	0.74788	0.74983	1	14076	1	1.6043	0.0041281	0.013083	0.492599	483	3	1.6043
OXSM	4	0.98384	0.98384	1	18527	0	1.5239	0.0041281	0.013083	0.492599	484	3	1.5239
HAUS1	4	0.58377	0.63076	1	11814	1	1.561	0.0041281	0.013083	0.492599	485	3	1.561
NPRL2	4	0.99443	0.99445	1	18798	0	1.651	0.0041281	0.013083	0.492599	486	3	1.651
NAA15	4	0.99338	0.99342	1	18770	0	1.561	0.0041281	0.013083	0.492599	487	3	1.561
WDR43	4	0.24097	0.3702	0.995653	7042	1	0.027378	0.0041303	0.013087	0.492599	488	2	0.027378
CHST4	4	0.76267	0.7633	1	14316	1	1.7073	0.0041616	0.01316	0.494321	489	2	1.7073
AGK	4	0.93914	0.93922	1	17676	0	1.4309	0.0041835	0.01321	0.494321	490	2	1.4309
SCGB2A2	4	0.95331	0.95338	1	17922	0	1.8632	0.0041981	0.013255	0.494355	491	3	1.8632
GOLGA7B	4	0.99028	0.99027	1	18695	0	2.0155	0.0042232	0.013315	0.494355	492	3	2.0155
CKS1B	4	0.9948	0.9948	1	18807	0	1.6647	0.004235	0.013347	0.494355	493	3	1.6647
MTPAP	3	0.99575	0.99586	1	18839	0	1.4353	0.0042467	0.011709	0.481596	494	3	1.4353
ABLIM2	4	0.74866	0.75053	1	14087	1	1.9637	0.0042507	0.013385	0.494355	495	3	1.9637
CNKSR1	4	0.98573	0.9857	1	18571	0	1.9044	0.004257	0.013404	0.494355	496	3	1.9044
MZT2B	4	0.42703	0.54663	1	10168	1	1.7856	0.0042657	0.013425	0.494355	497	3	1.7856
TYRO3	4	0.87276	0.87272	1	16445	0	1.7663	0.0042845	0.01347	0.494355	498	2	1.7663
SUGP1	4	0.086303	0.18919	0.971734	3656	1	2.3167	0.0042845	0.01347	0.494355	499	3	2.3167
GLS	3	0.43948	0.48501	1	10283	1	2.6168	0.0043085	0.01189	0.484863	500	2	2.6168
POLR2K	3	0.99566	0.99578	1	18837	0	1.4038	0.0043429	0.011986	0.487713	501	3	1.4038
SHCBP1L	4	0.99552	0.99551	1	18835	0	2.0766	0.0043676	0.013666	0.499566	502	3	2.0766
SNRNP40	3	0.041623	0.094316	0.96183	1981	2	-0.6606	0.0043772	0.012079	0.488161	503	1	-0.6606
DUS2	4	0.091679	0.19928	0.972476	3850	1	1.7681	0.0043869	0.013702	0.499566	504	3	1.7681
RARA	4	0.71316	0.72055	1	13530	1	1.9491	0.0044014	0.013735	0.499566	505	3	1.9491
PRR14	4	0.89128	0.89125	1	16783	0	1.8846	0.0044062	0.013743	0.499566	506	3	1.8846
CDC42EP4	4	0.94817	0.94823	1	17842	0	2.1521	0.0044515	0.013857	0.501364	507	3	2.1521
ALG5	4	0.76243	0.76309	1	14314	1	0.64525	0.0044761	0.013922	0.501364	508	2	0.64525
GPBP1	4	0.066436	0.15113	0.971423	2908	2	-0.67165	0.0044761	0.013922	0.501364	509	1	-0.67165
RFC4	4	0.93533	0.93542	1	17597	0	1.5381	0.0044761	0.013922	0.501364	510	3	1.5381
MED8	4	0.43017	0.54814	1	10188	1	2.1284	0.0045078	0.014002	0.501364	511	3	2.1284
OR4F4	4	0.38964	0.52916	1	9838	1	1.8432	0.0045078	0.014002	0.501364	512	2	1.8432
HAUS4	3	0.99547	0.9956	1	18833	0	-0.61478	0.0045255	0.01251	0.490924	513	3	-0.61478
PALB2	4	0.0098117	0.03286	0.898634	668	1	1.8957	0.0045349	0.014072	0.501364	514	3	1.8957
AQR	1	0.99544	0.9955	1	18830	0	3.4628	0.004557	0.004475	0.38286	515	1	3.4628
SDHA	1	0.99544	0.9955	1	18831	0	3.4628	0.004557	0.004475	0.38286	516	1	3.4628
U2AF1	1	0.99544	0.9955	1	18829	0	3.4628	0.004557	0.004475	0.38286	517	1	3.4628
PRKCB	4	0.75275	0.75429	1	14146	1	1.8954	0.0045662	0.014146	0.501776	518	3	1.8954
SDE2	3	0.87018	0.87028	1	16393	0	2.5458	0.004577	0.012665	0.490924	519	2	2.5458
SORBS2	4	0.85252	0.8524	1	16006	0	1.6976	0.0045794	0.014184	0.502204	520	3	1.6976
ELL	4	0.00024406	0.00090922	0.617101	22	2	0.19905	0.0046291	0.014302	0.505455	521	2	0.19905
C4orf33	4	0.83715	0.83709	1	15672	0	1.2522	0.0046806	0.014424	0.508803	522	2	1.2522
CHMP7	4	0.1414	0.26015	0.98742	4976	1	1.9249	0.0047062	0.014501	0.510586	523	3	1.9249
STBD1	4	0.83942	0.83934	1	15720	0	1.8814	0.0047231	0.01455	0.510835	524	3	1.8814
VEZT	4	0.3233	0.46052	1	8647	1	1.0621	0.0047421	0.014598	0.510835	525	2	1.0621
SYVN1	4	0.049983	0.11854	0.964956	2312	1	0.19837	0.0047421	0.014598	0.510835	526	1	0.19837
PCYT2	4	0.99703	0.99706	1	18893	0	1.9624	0.0047484	0.014615	0.510835	527	3	1.9624
YME1L1	4	0.98256	0.98258	1	18507	0	1.8787	0.004767	0.014659	0.511421	528	2	1.8787
IGFBP6	4	0.5701	0.6224	1	11664	1	1.9282	0.0047773	0.014693	0.511681	529	3	1.9282
TBC1D3K	3	0.99522	0.99535	1	18824	0	1.5697	0.0047793	0.013198	0.494321	530	3	1.5697
OR5M9	4	0.16219	0.28323	0.990226	5412	2	-0.27188	0.0048219	0.014806	0.512175	531	1	-0.27188
RNF181	4	0.29869	0.4336	1	8158	1	2.0777	0.0048361	0.014836	0.512175	532	3	2.0777
PHF23	4	0.86604	0.86597	1	16313	0	1.4846	0.0048361	0.014836	0.512175	533	3	1.4846
TLE3	4	0.86649	0.8664	1	16319	0	2.1347	0.0048586	0.014894	0.513055	534	3	2.1347
PPAN	3	0.72216	0.72233	1	13668	0	2.3156	0.004869	0.013434	0.494355	535	2	2.3156
METTL17	3	0.93247	0.93263	1	17529	0	2.3156	0.004869	0.013434	0.494355	536	2	2.3156
SLC35A2	4	0.9948	0.9948	1	18805	0	1.1595	0.0049282	0.015067	0.515823	537	3	1.1595
TIMM23B	4	0.7004	0.71063	1	13328	1	2.0099	0.0049554	0.015124	0.515823	538	3	2.0099
SPIRE2	4	0.99702	0.99705	1	18892	0	1.6801	0.0049614	0.01514	0.515823	539	3	1.6801
RNASEK	4	0.22231	0.34976	0.995653	6645	1	1.7006	0.0049718	0.015162	0.515823	540	3	1.7006
GSR	4	0.072937	0.16371	0.971423	3159	1	1.0476	0.0049814	0.015183	0.515823	541	2	1.0476
LRP5	4	0.93335	0.93346	1	17549	0	1.7172	0.0049886	0.015203	0.515823	542	2	1.7172
CH25H	4	0.89836	0.89828	1	16897	0	0.57399	0.0050346	0.015323	0.515823	543	1	0.57399
HAO1	4	0.10614	0.22079	0.980565	4240	2	0.89409	0.0050442	0.015348	0.515823	544	2	0.89409
SLC7A4	4	0.16106	0.28199	0.990226	5382	1	0.30531	0.0050877	0.015453	0.515823	545	1	0.30531
COQ7	3	0.99491	0.99505	1	18816	0	1.3401	0.0050914	0.014037	0.501364	546	3	1.3401
DPH1	3	0.97719	0.97736	1	18369	0	2.4473	0.0051006	0.014062	0.501364	547	2	2.4473
SMIM11	3	0.46652	0.50368	1	10556	1	2.4473	0.0051006	0.014062	0.501364	548	2	2.4473
LOC100505841	4	0.10548	0.22006	0.980565	4228	2	1.0246	0.0051113	0.015514	0.515823	549	2	1.0246
SRP9	3	0.80729	0.80727	1	15126	0	2.3631	0.0051154	0.014108	0.501364	550	2	2.3631
ALG13	3	0.027113	0.06862	0.944682	1411	1	0.96319	0.0051154	0.014108	0.501364	551	2	0.96319
RBP7	4	0.96686	0.9669	1	18154	0	2.1269	0.0051278	0.015546	0.515823	552	3	2.1269
CAB39	4	0.98772	0.98771	1	18629	0	1.5272	0.0051278	0.015546	0.515823	553	3	1.5272
NDUFAF6	4	0.99141	0.99145	1	18715	0	1.772	0.0051278	0.015546	0.515823	554	3	1.772
EIF3J	4	0.19794	0.32277	0.995653	6134	1	1.8796	0.0051278	0.015546	0.515823	555	3	1.8796
ZNHIT1	4	0.70773	0.71627	1	13451	1	1.9339	0.0051278	0.015546	0.515823	556	3	1.9339
CAD	4	0.87248	0.87243	1	16439	0	1.5446	0.0051278	0.015546	0.515823	557	3	1.5446
ADAMTS12	4	0.98545	0.98543	1	18564	0	1.6609	0.0051278	0.015546	0.515823	558	3	1.6609
SNRPA	4	0.97788	0.97807	1	18377	0	1.8624	0.0051278	0.015546	0.515823	559	3	1.8624
CFAP20	4	0.98772	0.98771	1	18639	0	1.4839	0.0051278	0.015546	0.515823	560	3	1.4839
FAM83B	4	0.028122	0.073496	0.944682	1458	1	0.21102	0.0051409	0.015569	0.515823	561	1	0.21102
TNNI1	4	0.84994	0.84984	1	15951	0	0.34815	0.0051941	0.015701	0.519304	562	1	0.34815
LY6K	4	0.77308	0.7731	1	14499	1	1.8459	0.0052361	0.015817	0.521426	563	3	1.8459
PRKAA2	4	0.69802	0.70879	1	13296	1	1.8059	0.0052379	0.01582	0.521426	564	3	1.8059
ATP6AP2	2	0.99475	0.9947	1	18804	0	2.1656	0.0052464	0.010187	0.463964	565	2	2.1656
PCGF6	4	0.93736	0.93746	1	17642	0	1.8822	0.0052473	0.015848	0.521449	566	3	1.8822
GPR34	4	0.97533	0.97551	1	18302	0	1.1458	0.0053004	0.015976	0.523859	567	2	1.1458
AVP	4	0.5826	0.63004	1	11802	1	0.89461	0.0053536	0.0161	0.526117	568	2	0.89461
SRSF10	4	0.9973	0.99729	1	18902	0	1.8359	0.00539	0.016184	0.527059	569	3	1.8359
PPP2R1A	4	0.9725	0.97264	1	18255	0	1.6017	0.00539	0.016184	0.527059	570	3	1.6017
TIMM44	3	0.24547	0.36553	0.995653	7131	1	0.31224	0.0054944	0.01509	0.515823	571	1	0.31224
RAD51D	3	0.57302	0.58427	1	11697	1	-0.61478	0.0054944	0.01509	0.515823	572	2	-0.61478
RPA2	4	0.19642	0.32112	0.995653	6108	1	-0.20017	0.0055131	0.016503	0.528434	573	1	-0.20017
C14orf178	4	0.83096	0.831	1	15565	0	0.66882	0.0055131	0.016503	0.528434	574	1	0.66882
POLR1E	4	0.99233	0.99236	1	18739	0	1.3717	0.0055743	0.016642	0.528434	575	3	1.3717
TIMM23	4	0.9974	0.99739	1	18908	0	1.6975	0.0055743	0.016642	0.528434	576	3	1.6975
GTF2H3	4	0.72384	0.72936	1	13696	1	1.7349	0.0055743	0.016642	0.528434	577	3	1.7349
CTC1	4	0.98889	0.98888	1	18662	0	1.5158	0.0055743	0.016642	0.528434	578	2	1.5158
HYPK	4	0.63254	0.66194	1	12396	1	0.97689	0.0055743	0.016642	0.528434	579	2	0.97689
CREG1	4	0.89286	0.89278	1	16809	0	1.2202	0.0055743	0.016642	0.528434	580	2	1.2202
RBM14	4	0.034428	0.086804	0.952236	1714	1	1.6534	0.0055743	0.016642	0.528434	581	3	1.6534
DDX51	4	0.98537	0.98536	1	18563	0	1.2947	0.0055743	0.016642	0.528434	582	2	1.2947
ELOVL7	4	0.39523	0.53175	1	9891	1	0.86765	0.0055743	0.016642	0.528434	583	2	0.86765
NGDN	4	0.011268	0.036683	0.909652	741	2	0.44557	0.0055743	0.016642	0.528434	584	2	0.44557
PLEKHG2	4	0.28537	0.41901	1	7910	1	0.99917	0.0055743	0.016642	0.528434	585	2	0.99917
RAD17	4	0.28242	0.41577	1	7850	1	1.807	0.0055743	0.016642	0.528434	586	3	1.807
PLK1	4	0.9949	0.99491	1	18815	0	1.7746	0.0055743	0.016642	0.528434	587	3	1.7746
AKR1B1	4	0.8845	0.88447	1	16656	0	2.0555	0.0055973	0.016703	0.529514	588	3	2.0555
KMT2B	4	0.12273	0.23934	0.986322	4574	1	2.2428	0.0057225	0.01702	0.535102	589	3	2.2428
MT2A	4	0.99597	0.99596	1	18840	0	1.6632	0.0057838	0.017152	0.537105	590	3	1.6632
SLC16A11	4	0.0094952	0.03185	0.898634	649	3	-1.2067	0.005832	0.017275	0.537105	591	1	-1.2067
NDUFAF5	4	0.89661	0.89657	1	16870	0	1.4844	0.0058562	0.017337	0.537105	592	3	1.4844
C4A	4	0.99414	0.99418	1	18792	0	1.9733	0.0058562	0.017337	0.537105	593	3	1.9733
AIFM1	4	0.43122	0.54863	1	10201	1	1.8839	0.0058562	0.017337	0.537105	594	3	1.8839
ALKBH5	4	0.020313	0.05686	0.931859	1141	1	1.6306	0.0058765	0.017395	0.538047	595	3	1.6306
NRF1	4	0.021102	0.058546	0.93556	1168	1	1.8714	0.0059536	0.017593	0.541512	596	3	1.8714
NBPF15	4	0.98772	0.98771	1	18642	0	1.1652	0.0060272	0.017792	0.5459	597	3	1.1652
IFI44L	4	0.23253	0.36096	0.995653	6855	2	0.17168	0.0061508	0.018091	0.551205	598	2	0.17168
MEX3A	4	0.99062	0.99062	1	18699	0	1.6889	0.0061811	0.018167	0.551205	599	3	1.6889
B3GAT2	4	0.98013	0.98021	1	18420	0	1.5968	0.0061811	0.018167	0.551205	600	2	1.5968
PLA2G3	4	0.36861	0.51047	1	9518	2	0.94024	0.0061811	0.018167	0.551205	601	2	0.94024
LMTK3	4	0.53686	0.60328	1	11297	1	1.6784	0.0061811	0.018167	0.551205	602	2	1.6784
RIOK2	4	0.86085	0.8607	1	16181	0	1.0549	0.0061811	0.018167	0.551205	603	2	1.0549
UQCRB	4	0.14691	0.26627	0.988221	5089	1	-1.1205	0.0062039	0.018218	0.55187	604	2	-1.1205
PGGT1B	3	0.99379	0.99393	1	18780	0	1.269	0.0062075	0.016976	0.535102	605	3	1.269
TRAPPC1	3	0.99379	0.99393	1	18781	0	0.93837	0.0062075	0.016976	0.535102	606	3	0.93837
EMC7	3	0.99379	0.99393	1	18779	0	1.6988	0.0062075	0.016976	0.535102	607	3	1.6988
GJC3	4	0.96579	0.96584	1	18142	0	1.674	0.0062208	0.018257	0.552157	608	3	1.674
PLA2G2F	3	0.10801	0.18704	0.971423	4274	1	0.049338	0.0062919	0.017185	0.537105	609	1	0.049338
AP5B1	4	0.29	0.42407	1	8007	2	0.28824	0.0063102	0.018471	0.556919	610	2	0.28824
COPB1	3	0.99184	0.99197	1	18724	0	1.0417	0.0063317	0.017293	0.537105	611	3	1.0417
SLC35D3	4	0.948	0.94807	1	17838	0	1.7489	0.0063506	0.018571	0.558203	612	3	1.7489
LHFPL4	4	0.12311	0.23975	0.986322	4584	2	-0.31568	0.0063633	0.018605	0.558203	613	1	-0.31568
DAOA	4	0.99663	0.99667	1	18878	0	1.791	0.0063813	0.018655	0.558203	614	3	1.791
FAM25G	4	0.1669	0.28848	0.991181	5505	1	1.2705	0.0063842	0.018661	0.558203	615	2	1.2705
DKK4	4	0.29745	0.43223	1	8134	1	1.5633	0.0063842	0.018661	0.558203	616	2	1.5633
CACTIN	4	0.93426	0.93436	1	17575	0	1.6431	0.0064038	0.018702	0.558554	617	3	1.6431
NBPF10	3	0.9504	0.95066	1	17881	0	2.2531	0.0064063	0.017498	0.53946	618	2	2.2531
ZNF785	4	0.95271	0.95278	1	17915	0	1.563	0.0064719	0.018855	0.559989	619	2	1.563
ARMC10	4	0.76399	0.76447	1	14346	1	0.083364	0.0064961	0.018926	0.559989	620	1	0.083364
HMGCS2	4	0.56349	0.61858	1	11592	1	-0.16669	0.0064961	0.018926	0.559989	621	1	-0.16669
RBM15	4	0.77552	0.77545	1	14534	1	0.49395	0.0064961	0.018926	0.559989	622	2	0.49395
AP3B1	4	0.33267	0.47091	1	8829	2	0.49176	0.0064961	0.018926	0.559989	623	2	0.49176
FARSA	3	0.026032	0.066073	0.944682	1369	1	-1.0445	0.0065111	0.017748	0.545407	624	1	-1.0445
CNNM3	4	0.89679	0.89673	1	16874	0	1.8085	0.0065474	0.019053	0.561386	625	3	1.8085
CHTOP	4	0.716	0.72286	1	13572	1	1.723	0.0065496	0.019055	0.561386	626	3	1.723
OR10A3	4	0.92543	0.92557	1	17393	0	1.7314	0.0065652	0.019095	0.561386	627	3	1.7314
VARS2	2	0.97672	0.97683	1	18344	0	1.5042	0.0065945	0.012657	0.490924	628	2	1.5042
SF3A1	2	0.96569	0.9658	1	18138	0	2.3821	0.0065945	0.012657	0.490924	629	2	2.3821
RPS26	2	0.98193	0.98198	1	18491	0	2.2932	0.0065945	0.012657	0.490924	630	2	2.2932
NAA10	2	0.98922	0.98918	1	18669	0	2.5232	0.0065945	0.012657	0.490924	631	2	2.5232
RAB35	4	0.80075	0.80069	1	15012	0	1.4233	0.0066186	0.019219	0.561386	632	3	1.4233
OPA1	4	0.86557	0.8655	1	16298	0	1.7365	0.0066186	0.019219	0.561386	633	3	1.7365
SPATA31E1	4	0.4936	0.57998	1	10838	1	1.8639	0.0066186	0.019219	0.561386	634	3	1.8639
ACVR1B	4	0.44208	0.55383	1	10313	1	0.86043	0.0066289	0.019248	0.561386	635	2	0.86043
NBN	4	0.99327	0.9933	1	18765	0	2.1196	0.0066616	0.01933	0.562342	636	3	2.1196
NDOR1	2	0.99334	0.99333	1	18767	0	2.0145	0.0066629	0.01278	0.490924	637	2	2.0145
PEX13	4	0.99014	0.99012	1	18691	0	1.6638	0.0066753	0.019365	0.562495	638	3	1.6638
OS9	4	0.55515	0.61367	1	11501	1	1.7	0.0067024	0.019438	0.562907	639	2	1.7
SLC25A1	4	0.033125	0.084053	0.948034	1669	2	0.65182	0.0067024	0.019438	0.562907	640	2	0.65182
SELT	4	0.78533	0.78522	1	14730	1	1.1032	0.0067351	0.019537	0.564275	641	3	1.1032
SRSF9	4	0.4135	0.54023	1	10054	1	1.8029	0.00676	0.019601	0.564275	642	3	1.8029
MUC17	4	0.97869	0.97883	1	18392	0	1.5211	0.0067781	0.019646	0.564275	643	3	1.5211
MYL10	4	0.93095	0.93108	1	17496	0	1.6241	0.0067887	0.019663	0.564275	644	3	1.6241
GNB1	4	0.98733	0.98729	1	18613	0	1.9566	0.0068443	0.019789	0.56704	645	3	1.9566
USP48	4	0.45604	0.56075	1	10445	1	2.0063	0.0068872	0.01989	0.568455	646	3	2.0063
ASCL3	4	0.65655	0.67841	1	12715	1	1.6898	0.0068915	0.019898	0.568455	647	3	1.6898
SULT1A4	4	0.084956	0.18664	0.971423	3606	1	1.6269	0.0069066	0.019934	0.568641	648	3	1.6269
RRP1	3	0.936	0.93618	1	17607	0	0.24729	0.0069495	0.01892	0.559989	649	1	0.24729
NUP43	3	0.72523	0.7254	1	13728	0	1.1233	0.0070093	0.019071	0.561386	650	2	1.1233
ALDH4A1	4	0.051472	0.12157	0.969288	2358	1	1.8629	0.0070563	0.020305	0.570926	651	3	1.8629
TRAIP	3	0.8551	0.85515	1	16051	0	2.4215	0.0070744	0.019236	0.561386	652	2	2.4215
GALE	3	0.99291	0.99305	1	18760	0	1.7539	0.0070863	0.019268	0.561386	653	3	1.7539
B4GALT2	4	0.60733	0.64546	1	12110	1	1.7564	0.0070913	0.020393	0.570926	654	3	1.7564
PEX12	4	0.044475	0.10746	0.96183	2088	1	1.6666	0.0071091	0.020445	0.570926	655	2	1.6666
FAM160B2	4	0.31614	0.45281	1	8505	2	1.1451	0.0071775	0.020618	0.570926	656	2	1.1451
SP140	4	0.70061	0.71079	1	13334	1	1.885	0.0072569	0.020797	0.570926	657	2	1.885
PRRG1	4	0.94034	0.94044	1	17705	0	1.7303	0.0072861	0.020859	0.570926	658	2	1.7303
CTAGE1	4	0.36029	0.50127	1	9365	1	1.5243	0.0072892	0.020868	0.570926	659	3	1.5243
ANP32A	4	0.45562	0.56054	1	10443	1	-0.083277	0.0073191	0.020942	0.570926	660	1	-0.083277
SNRNP27	4	0.037777	0.0937	0.96183	1829	1	1.0551	0.0073191	0.020942	0.570926	661	2	1.0551
TRAF6	4	0.48872	0.57741	1	10789	1	-0.23417	0.0073191	0.020942	0.570926	662	1	-0.23417
FLNC	4	0.84328	0.84314	1	15809	0	0.40584	0.0073191	0.020942	0.570926	663	1	0.40584
HMGCR	4	0.28673	0.42048	1	7935	1	1.2301	0.0073191	0.020942	0.570926	664	2	1.2301
ALAD	4	0.014096	0.043025	0.913041	883	1	1.6276	0.0073191	0.020942	0.570926	665	3	1.6276
ERVW-1	4	0.18265	0.30592	0.994275	5822	1	1.1326	0.0073191	0.020942	0.570926	666	2	1.1326
CRCP	4	0.10622	0.22088	0.980565	4242	1	0.63232	0.0073191	0.020942	0.570926	667	2	0.63232
REEP4	4	0.93426	0.93436	1	17571	0	1.6628	0.0073585	0.021026	0.5724	668	3	1.6628
ALDH1B1	4	0.60889	0.64647	1	12126	1	1.998	0.0074137	0.021161	0.575266	669	3	1.998
COPS5	3	0.032997	0.081843	0.945689	1663	1	0.66954	0.0074276	0.02016	0.570827	670	1	0.66954
TMEM261	3	0.00029296	0.0008646	0.617101	25	2	-2.2036	0.0074276	0.02016	0.570827	671	1	-2.2036
JTB	3	0.81168	0.81165	1	15201	0	0.53347	0.0074276	0.02016	0.570827	672	1	0.53347
RPLP2	3	0.20059	0.3109	0.994275	6186	1	-0.61478	0.0074276	0.02016	0.570827	673	2	-0.61478
MTF1	3	0.014283	0.037541	0.909652	893	1	-0.34065	0.0074276	0.02016	0.570827	674	1	-0.34065
SLC25A30	4	0.84507	0.84494	1	15843	0	1.7162	0.0074437	0.021231	0.575581	675	2	1.7162
DPH6	4	0.83905	0.83896	1	15715	0	1.5715	0.0074611	0.021277	0.575581	676	3	1.5715
SYT3	4	0.96749	0.96752	1	18165	0	1.8492	0.0074611	0.021277	0.575581	677	3	1.8492
KRT5	3	0.99254	0.99265	1	18751	0	1.4929	0.0074643	0.02025	0.570926	678	3	1.4929
XRCC1	4	0.96146	0.96145	1	18043	0	1.7014	0.0074838	0.021323	0.575581	679	3	1.7014
ARL2	3	0.99251	0.99263	1	18750	0	1.3801	0.0074873	0.020314	0.570926	680	3	1.3801
EID3	4	0.43572	0.55076	1	10252	1	1.6825	0.0075019	0.021373	0.576096	681	3	1.6825
SLBP	3	0.98816	0.98833	1	18645	0	2.5074	0.007575	0.02054	0.570926	682	2	2.5074
HDGF	3	0.99242	0.99254	1	18745	0	1.6887	0.0075765	0.020545	0.570926	683	3	1.6887
HAVCR1	4	0.82478	0.82476	1	15456	0	1.7399	0.0075909	0.02159	0.578498	684	3	1.7399
CKAP5	1	0.99239	0.9924	1	18743	0	3.7339	0.0076062	0.0075381	0.437284	685	1	3.7339
LDLRAD4	4	0.60028	0.64105	1	12028	1	1.5798	0.007623	0.021647	0.578498	686	3	1.5798
CDC14A	4	0.99135	0.99138	1	18713	0	1.8406	0.0076621	0.021731	0.578498	687	3	1.8406
POLDIP2	4	0.9955	0.9955	1	18834	0	1.7444	0.0076839	0.021782	0.578498	688	3	1.7444
PWP1	3	0.86934	0.86944	1	16366	0	2.0747	0.0077076	0.020901	0.570926	689	2	2.0747
KLHL40	4	0.35406	0.49446	1	9235	1	1.5275	0.0077145	0.021851	0.578498	690	2	1.5275
MPV17L2	3	0.99229	0.9924	1	18736	0	0.96319	0.0077147	0.020921	0.570926	691	3	0.96319
HSPH1	4	0.76978	0.76996	1	14438	1	1.4691	0.0077473	0.021936	0.578498	692	2	1.4691
RPL12	2	0.90781	0.90765	1	17072	0	2.4384	0.0077645	0.014779	0.512175	693	1	2.4384
OR10J1	4	0.52587	0.59724	1	11179	1	1.1846	0.0077829	0.022024	0.578498	694	2	1.1846
CCDC59	4	0.86245	0.86238	1	16217	0	1.4644	0.0077829	0.022024	0.578498	695	2	1.4644
COX11	2	0.9922	0.9922	1	18734	0	2.3021	0.0077966	0.014841	0.512175	696	2	2.3021
GALNT3	4	0.83723	0.83717	1	15675	0	1.0279	0.0078499	0.022193	0.578498	697	2	1.0279
FNDC5	4	0.14119	0.25991	0.987284	4971	2	-0.15841	0.0078499	0.022193	0.578498	698	1	-0.15841
ATPAF2	4	0.68459	0.69867	1	13103	1	1.4743	0.0078606	0.022213	0.578498	699	3	1.4743
LIMD1	4	0.95895	0.95897	1	18008	0	1.4917	0.0078606	0.022213	0.578498	700	3	1.4917
SNRPC	3	0.99213	0.99226	1	18733	0	0.92785	0.0078658	0.021316	0.575581	701	3	0.92785
SPATA5L1	4	0.98772	0.98771	1	18626	0	1.9425	0.0078791	0.022256	0.578498	702	3	1.9425
KIAA1804	4	0.43686	0.55128	1	10264	1	1.341	0.0078846	0.022272	0.578498	703	2	1.341
KNTC1	4	0.094358	0.20424	0.974335	3940	1	1.1697	0.0079316	0.022385	0.578498	704	2	1.1697
TPM1	4	0.54683	0.60891	1	11396	1	1.5118	0.0079369	0.022394	0.578498	705	3	1.5118
CHMP4C	4	0.99369	0.99372	1	18776	0	1.677	0.0079746	0.022482	0.578498	706	3	1.677
GUF1	4	0.96576	0.9658	1	18140	0	1.7758	0.0079841	0.022507	0.578498	707	3	1.7758
TRAPPC3	3	0.99201	0.99215	1	18730	0	1.7332	0.0079859	0.021633	0.578498	708	3	1.7332
TMEM229A	4	0.76864	0.7689	1	14420	1	1.7287	0.0080037	0.022556	0.578498	709	2	1.7287
SLC17A3	4	0.018773	0.053446	0.925773	1081	3	-0.99813	0.008009	0.022568	0.578498	710	1	-0.99813
MYL9	4	0.36578	0.50734	1	9469	1	0.83436	0.008009	0.022568	0.578498	711	1	0.83436
SUCNR1	4	0.36565	0.5072	1	9463	1	1.7023	0.0080125	0.02258	0.578498	712	3	1.7023
TAF6L	4	0.84907	0.84896	1	15931	0	1.8198	0.0080287	0.022621	0.578498	713	2	1.8198
CENPJ	4	0.95024	0.95031	1	17875	0	1.4871	0.0080683	0.02272	0.578498	714	3	1.4871
ANKRD52	4	0.92016	0.92028	1	17294	0	1.629	0.0080683	0.02272	0.578498	715	3	1.629
TADA1	4	0.99231	0.99234	1	18737	0	1.6697	0.0081208	0.022854	0.578498	716	2	1.6697
HIST1H2BJ	4	0.99722	0.99722	1	18898	0	1.7989	0.0081208	0.022854	0.578498	717	3	1.7989
CISD3	4	0.95664	0.95664	1	17967	0	0.78139	0.0081682	0.022965	0.578498	718	1	0.78139
MYBBP1A	4	0.29693	0.43167	1	8125	1	0.67957	0.0081682	0.022965	0.578498	719	2	0.67957
PKMYT1	4	0.47895	0.5724	1	10686	1	1.7114	0.0082021	0.023042	0.578498	720	2	1.7114
PRPF40A	3	0.99174	0.99187	1	18722	0	1.269	0.0082585	0.022326	0.578498	721	3	1.269
PGLYRP3	4	0.28216	0.41547	1	7841	2	0.048253	0.0082743	0.023218	0.578498	722	1	0.048253
ZCWPW2	4	0.90864	0.90864	1	17089	0	0.64966	0.0083273	0.023342	0.578498	723	1	0.64966
POLE2	2	0.99161	0.99159	1	18720	0	2.0256	0.0083908	0.0159	0.522273	724	2	2.0256
BAZ2A	4	0.36301	0.5043	1	9409	1	1.1621	0.0083972	0.023501	0.578498	725	2	1.1621
GMPPB	2	0.98193	0.98198	1	18481	0	2.4316	0.0084423	0.016007	0.523963	726	2	2.4316
DNAH17	3	0.86828	0.86833	1	16349	0	2.3578	0.0084527	0.02283	0.578498	727	2	2.3578
ANKRD13A	4	0.0018236	0.0064802	0.735149	161	2	0.34829	0.0084798	0.023705	0.578498	728	2	0.34829
MS4A7	4	0.37443	0.51689	1	9637	1	0.65328	0.0084864	0.023728	0.578498	729	2	0.65328
GNL3L	3	0.88307	0.88316	1	16627	0	2.1717	0.0084916	0.022927	0.578498	730	2	2.1717
PLCB3	3	0.68547	0.68546	1	13115	0	2.1717	0.0084916	0.022927	0.578498	731	2	2.1717
ZFC3H1	4	0.98207	0.9821	1	18498	0	1.8177	0.0085084	0.02378	0.578498	732	3	1.8177
KATNB1	3	0.36551	0.43661	1	9460	1	0.24134	0.0085624	0.02311	0.578498	733	1	0.24134
TYW3	4	0.80899	0.80892	1	15152	0	1.0712	0.0085944	0.023999	0.578498	734	2	1.0712
L3MBTL3	4	0.33267	0.47091	1	8827	2	0.92738	0.0085944	0.023999	0.578498	735	2	0.92738
F2R	4	0.16906	0.2909	0.993193	5540	1	1.1505	0.0085944	0.023999	0.578498	736	2	1.1505
MCAM	4	0.28599	0.41966	1	7924	1	1.1409	0.0085944	0.023999	0.578498	737	2	1.1409
C8orf33	3	0.9914	0.99152	1	18714	0	1.6988	0.0085966	0.023195	0.578498	738	3	1.6988
SIAH2	4	0.63623	0.66437	1	12447	1	0.49399	0.0086721	0.024202	0.578498	739	2	0.49399
WNT10A	4	0.75275	0.75429	1	14145	1	1.6664	0.0086721	0.024202	0.578498	740	3	1.6664
TBC1D3	4	0.68944	0.70229	1	13174	1	1.1593	0.0087068	0.02428	0.578498	741	2	1.1593
TMEM132A	4	0.53322	0.60122	1	11256	1	1.5526	0.0087386	0.024355	0.578498	742	2	1.5526
AGPAT6	4	0.42573	0.546	1	10160	1	1.331	0.0087388	0.024355	0.578498	743	3	1.331
PRIM1	4	0.99523	0.99523	1	18825	0	1.331	0.0087388	0.024355	0.578498	744	3	1.331
NDUFA4	4	0.97635	0.97654	1	18320	0	1.6653	0.0087388	0.024355	0.578498	745	3	1.6653
SEPSECS	4	0.99403	0.99408	1	18790	0	1.519	0.0087388	0.024355	0.578498	746	3	1.519
TRIM43	4	0.74598	0.74813	1	14046	1	1.1161	0.0087388	0.024355	0.578498	747	3	1.1161
VPS36	4	0.96471	0.96474	1	18117	0	1.505	0.0087388	0.024355	0.578498	748	3	1.505
TRMT5	4	0.9145	0.91455	1	17191	0	1.331	0.0087388	0.024355	0.578498	749	3	1.331
TOMM40	4	0.78609	0.786	1	14740	0	0.96319	0.0087388	0.024355	0.578498	750	3	0.96319
AK6	4	0.015522	0.046276	0.921724	940	1	1.3743	0.0087388	0.024355	0.578498	751	3	1.3743
CCDC115	4	0.97558	0.97576	1	18309	0	1.3517	0.0087388	0.024355	0.578498	752	3	1.3517
DERL2	4	0.98772	0.98771	1	18628	0	1.3279	0.0087388	0.024355	0.578498	753	3	1.3279
SPG21	4	0.9733	0.97346	1	18264	0	1.331	0.0087388	0.024355	0.578498	754	3	1.331
POLE3	4	0.85217	0.85203	1	16003	0	1.2713	0.0087388	0.024355	0.578498	755	3	1.2713
NDUFA10	4	0.73042	0.73479	1	13801	1	1.4837	0.0087388	0.024355	0.578498	756	3	1.4837
FAM136A	4	0.97482	0.97498	1	18291	0	1.3585	0.0087388	0.024355	0.578498	757	3	1.3585
NUBP2	4	0.98772	0.98771	1	18620	0	0.96319	0.0087388	0.024355	0.578498	758	3	0.96319
MRPS9	4	0.9933	0.99333	1	18766	0	1.2177	0.0087388	0.024355	0.578498	759	3	1.2177
OXLD1	4	0.9703	0.97038	1	18222	0	1.8141	0.0087388	0.024355	0.578498	760	3	1.8141
NFU1	4	0.99533	0.99533	1	18827	0	1.4537	0.0087388	0.024355	0.578498	761	3	1.4537
KTI12	4	0.17448	0.29693	0.994247	5641	1	0.96319	0.0087388	0.024355	0.578498	762	3	0.96319
LSM12	4	0.9948	0.9948	1	18813	0	1.1932	0.0087388	0.024355	0.578498	763	3	1.1932
USP17L30	4	0.25535	0.38598	0.997035	7337	1	1.4244	0.0087388	0.024355	0.578498	764	3	1.4244
RFC1	4	0.22132	0.34865	0.995653	6621	1	0.9896	0.0087705	0.024435	0.578498	765	3	0.9896
ZNF14	4	0.58364	0.63068	1	11813	1	1.4883	0.0087966	0.024502	0.578498	766	2	1.4883
ADAMTS20	4	0.98145	0.98147	1	18462	0	1.8427	0.0088024	0.024519	0.578498	767	2	1.8427
PRR20B	4	0.91688	0.91693	1	17228	0	1.5324	0.0088046	0.024523	0.578498	768	3	1.5324
MRPS15	3	0.84189	0.8419	1	15786	0	0.10569	0.008841	0.023801	0.578498	769	1	0.10569
ERN1	3	0.99114	0.99125	1	18709	0	1.3137	0.008858	0.023842	0.578498	770	3	1.3137
TRIM28	4	0.58528	0.63172	1	11829	1	1.6112	0.008884	0.024712	0.581503	771	2	1.6112
C2orf81	4	0.67572	0.69212	1	12983	1	1.3151	0.0089107	0.024776	0.582287	772	2	1.3151
TNFRSF10C	4	0.29243	0.42672	1	8051	2	1.1306	0.0089835	0.024952	0.585711	773	2	1.1306
SLC11A1	4	0.45547	0.56047	1	10439	1	1.152	0.0090393	0.025088	0.586123	774	2	1.152
PTHLH	4	0.29835	0.43324	1	8152	2	-0.4599	0.0090432	0.025105	0.586123	775	1	-0.4599
VAPA	4	0.93116	0.93131	1	17499	0	0.73922	0.0090432	0.025105	0.586123	776	2	0.73922
RAD51B	4	0.9182	0.91823	1	17251	0	1.491	0.0090482	0.025112	0.586123	777	2	1.491
CIPC	4	0.014149	0.043149	0.913041	886	1	2.0997	0.0090599	0.025135	0.586123	778	3	2.0997
FAM196B	4	0.65641	0.67831	1	12714	1	1.2775	0.0090658	0.025154	0.586123	779	2	1.2775
PPIAL4D	3	0.87018	0.87028	1	16392	0	1.6988	0.0090818	0.024437	0.578498	780	2	1.6988
NPLOC4	3	0.96311	0.96334	1	18093	0	1.6988	0.0090818	0.024437	0.578498	781	2	1.6988
WDR18	3	0.48706	0.51834	1	10766	1	1.6988	0.0090818	0.024437	0.578498	782	2	1.6988
LARS2	3	0.20768	0.32011	0.995449	6341	1	1.6988	0.0090818	0.024437	0.578498	783	2	1.6988
MRPL47	3	0.93755	0.93774	1	17644	0	1.6988	0.0090818	0.024437	0.578498	784	2	1.6988
LIAS	3	0.26915	0.37879	0.996502	7596	1	1.6988	0.0090818	0.024437	0.578498	785	2	1.6988
ILF3	3	0.083492	0.15344	0.971423	3542	1	1.6988	0.0090818	0.024437	0.578498	786	2	1.6988
RBM39	3	0.95793	0.95821	1	17988	0	1.6988	0.0090818	0.024437	0.578498	787	2	1.6988
ANAPC2	3	0.47287	0.50824	1	10625	1	1.6988	0.0090818	0.024437	0.578498	788	2	1.6988
PPIL2	3	0.10238	0.17931	0.971423	4171	1	1.6988	0.0090818	0.024437	0.578498	789	2	1.6988
PSMD3	3	0.049288	0.10534	0.96183	2284	1	1.6988	0.0090818	0.024437	0.578498	790	2	1.6988
RNF20	3	0.86866	0.86873	1	16357	0	1.6988	0.0090818	0.024437	0.578498	791	2	1.6988
CTU2	3	0.98506	0.98523	1	18558	0	1.6988	0.0090818	0.024437	0.578498	792	2	1.6988
VPS16	3	0.82176	0.8218	1	15411	0	1.6988	0.0090818	0.024437	0.578498	793	2	1.6988
DLD	3	0.023079	0.059052	0.93556	1254	1	1.6988	0.0090818	0.024437	0.578498	794	2	1.6988
KIF3A	4	0.36925	0.51118	1	9533	1	1.5983	0.0090835	0.025198	0.586447	795	2	1.5983
MCM6	2	0.79331	0.79284	1	14878	0	1.8053	0.0090933	0.017229	0.537105	796	1	1.8053
OSBP	2	0.96814	0.96826	1	18176	0	2.3498	0.0090933	0.017229	0.537105	797	2	2.3498
NUDC	3	0.53072	0.55092	1	11229	1	1.1544	0.0091594	0.024649	0.580742	798	2	1.1544
HECTD1	4	0.99194	0.99195	1	18729	0	1.7	0.0091604	0.025379	0.589211	799	2	1.7
ZNF511	4	0.95646	0.95648	1	17964	0	1.6528	0.0091604	0.025379	0.589211	800	2	1.6528
MRPL33	2	0.99077	0.99074	1	18701	0	2.1854	0.009231	0.017484	0.53946	801	2	2.1854
KIF22	4	0.59458	0.63745	1	11952	1	0.60197	0.0092553	0.025618	0.592064	802	1	0.60197
TRIP6	4	0.85091	0.85079	1	15982	0	1.5694	0.0092583	0.025626	0.592064	803	2	1.5694
CCDC64	4	0.49726	0.5819	1	10879	1	1.3188	0.0092583	0.025626	0.592064	804	2	1.3188
PHF8	4	0.8963	0.89627	1	16861	0	1.8303	0.0092583	0.025626	0.592064	805	3	1.8303
ESCO2	4	0.97656	0.97675	1	18324	0	1.2538	0.0093878	0.025941	0.596931	806	3	1.2538
CANT1	4	0.98485	0.98484	1	18553	0	1.9212	0.0094267	0.026032	0.596931	807	3	1.9212
HIPK2	4	0.85619	0.85612	1	16073	0	0.35061	0.0094408	0.026064	0.596931	808	1	0.35061
DTX2	4	0.98312	0.98312	1	18516	0	1.806	0.0094583	0.026113	0.596931	809	3	1.806
EDC4	4	0.81003	0.80996	1	15170	0	1.9111	0.0094714	0.026145	0.596931	810	3	1.9111
SDR42E1	4	0.81454	0.81447	1	15257	0	1.1855	0.0094738	0.026148	0.596931	811	2	1.1855
DET1	4	0.88597	0.88594	1	16679	0	1.507	0.0094738	0.026148	0.596931	812	2	1.507
CHMP3	4	0.86282	0.86274	1	16220	0	0.5814	0.0094938	0.026199	0.597342	813	2	0.5814
RAC3	4	0.28445	0.41798	1	7889	2	1.0864	0.0095975	0.026448	0.600709	814	2	1.0864
PIM1	4	0.67362	0.69055	1	12954	1	1.5159	0.0096252	0.026504	0.600709	815	3	1.5159
SGTA	4	0.68909	0.70203	1	13169	1	1.8494	0.0096521	0.026576	0.601641	816	3	1.8494
RPAP3	4	0.82137	0.82133	1	15403	0	1.7846	0.0097373	0.026791	0.6043	817	3	1.7846
PRPF4	3	0.99026	0.99039	1	18694	0	0.91834	0.0097446	0.026149	0.596931	818	3	0.91834
RPS10-NUDT3	2	0.99025	0.99022	1	18693	0	1.9614	0.009751	0.018473	0.556919	819	2	1.9614
TACO1	4	0.99647	0.9965	1	18874	0	1.5461	0.0097576	0.026831	0.6043	820	3	1.5461
GAN	4	0.97873	0.97887	1	18393	0	1.6394	0.0097872	0.026902	0.6043	821	3	1.6394
RGL3	4	0.88248	0.88247	1	16615	0	1.7482	0.0098452	0.027038	0.6043	822	3	1.7482
GFM2	3	0.96311	0.96334	1	18090	0	-0.61478	0.0098754	0.026483	0.600709	823	2	-0.61478
NOL12	3	0.048475	0.10422	0.96183	2254	1	0.15613	0.0098754	0.026483	0.600709	824	1	0.15613
SDHB	3	0.93396	0.93412	1	17564	0	0.30583	0.0098754	0.026483	0.600709	825	2	0.30583
IL3RA	4	0.65072	0.67435	1	12634	1	0.72271	0.0098912	0.027141	0.6043	826	2	0.72271
RPN1	4	0.9072	0.90723	1	17060	0	1.0749	0.0098912	0.027141	0.6043	827	2	1.0749
CIT	4	0.098414	0.21159	0.975216	4072	1	0.86677	0.0098912	0.027141	0.6043	828	2	0.86677
USP36	4	0.56833	0.62137	1	11644	1	1.0628	0.0098912	0.027141	0.6043	829	2	1.0628
GCHFR	4	0.87356	0.87352	1	16461	0	1.1555	0.0098912	0.027141	0.6043	830	2	1.1555
ELK3	4	0.55474	0.61344	1	11498	1	1.6578	0.0099075	0.027179	0.6043	831	3	1.6578
HNRNPA1	4	0.8657	0.86564	1	16303	0	1.0818	0.0099178	0.0272	0.6043	832	3	1.0818
SEPHS1	4	0.98812	0.98811	1	18644	0	1.4961	0.0099178	0.0272	0.6043	833	2	1.4961
MISP	4	0.5208	0.59447	1	11134	1	1.021	0.0099178	0.0272	0.6043	834	2	1.021
TPX2	3	0.99006	0.99019	1	18690	0	1.0284	0.0099414	0.026652	0.602629	835	3	1.0284
ZKSCAN3	4	0.28447	0.418	1	7890	1	1.4923	0.0099887	0.027374	0.606045	836	2	1.4923
RAB6A	4	0.9948	0.9948	1	18812	0	1.806	0.0099892	0.027374	0.606045	837	3	1.806
MRM1	4	0.39158	0.53004	1	9858	1	1.4899	0.010019	0.027445	0.606915	838	3	1.4899
TMPRSS12	4	0.97683	0.97702	1	18360	0	1.7271	0.010038	0.027492	0.607232	839	3	1.7271
ZC3H18	4	0.15375	0.27385	0.990175	5231	2	0.84907	0.010085	0.027596	0.608842	840	2	0.84907
MRPL23	3	0.98987	0.99	1	18687	0	1.3706	0.010131	0.02714	0.6043	841	3	1.3706
IMMT	4	0.12377	0.24052	0.986322	4602	1	2.0249	0.010143	0.027746	0.610295	842	3	2.0249
KISS1	4	0.51072	0.58896	1	11038	1	1.7302	0.01015	0.02776	0.610295	843	3	1.7302
TRIM25	4	0.73652	0.73984	1	13895	1	1.2916	0.010156	0.027774	0.610295	844	2	1.2916
NVL	3	0.98982	0.98995	1	18685	0	1.0494	0.010182	0.027274	0.605221	845	3	1.0494
EIF2AK4	4	0.81107	0.811	1	15189	0	1.5314	0.010188	0.027857	0.610295	846	3	1.5314
OGFRL1	4	0.777	0.77686	1	14562	1	1.8069	0.010206	0.027903	0.610295	847	3	1.8069
MGEA5	4	0.88576	0.88572	1	16672	0	1.4302	0.010212	0.027918	0.610295	848	2	1.4302
TAF11	4	0.81686	0.81682	1	15313	0	1.2155	0.010212	0.027918	0.610295	849	2	1.2155
BECN1	4	0.23013	0.35833	0.995653	6803	1	0.68045	0.010212	0.027918	0.610295	850	2	0.68045
SP3	4	0.68609	0.69982	1	13126	1	1.196	0.010237	0.027974	0.61082	851	2	1.196
RIMBP2	4	0.99566	0.99564	1	18836	0	1.9474	0.010287	0.028096	0.612781	852	3	1.9474
FAIM3	4	0.13412	0.25203	0.986805	4823	1	1.0728	0.010334	0.028216	0.614703	853	2	1.0728
C1orf189	4	0.43679	0.55125	1	10262	1	1.5247	0.010353	0.028275	0.614945	854	3	1.5247
BAG4	4	0.39301	0.53072	1	9876	1	1.6145	0.010363	0.028298	0.614945	855	3	1.6145
CRYGA	4	0.98924	0.98922	1	18672	0	1.6684	0.010387	0.028365	0.614945	856	3	1.6684
APPL2	4	0.41862	0.54261	1	10097	1	-0.21769	0.010394	0.028389	0.614945	857	1	-0.21769
RNF113A	4	0.62881	0.65949	1	12350	1	1.2336	0.010404	0.028413	0.614945	858	3	1.2336
ZNF292	4	0.75364	0.75509	1	14161	1	1.2086	0.010544	0.028765	0.620826	859	3	1.2086
IQCH	4	0.040968	0.10029	0.96183	1947	2	-0.39099	0.010553	0.02879	0.620826	860	1	-0.39099
ARPC3	4	0.13083	0.24835	0.986322	4742	1	1.1307	0.010574	0.028834	0.621064	861	3	1.1307
ZNF335	4	0.28324	0.4167	1	7866	2	-0.47597	0.010606	0.028898	0.621648	862	1	-0.47597
NDUFB9	3	0.98937	0.98949	1	18677	0	0.96319	0.01063	0.028421	0.614945	863	3	0.96319
EMP1	4	0.7511	0.75275	1	14117	1	1.6235	0.01064	0.028989	0.621648	864	2	1.6235
MRPL30	3	0.58724	0.59607	1	11857	1	0.96319	0.010651	0.028479	0.615515	865	2	0.96319
RHEB	4	0.97929	0.97943	1	18405	0	1.4769	0.010658	0.029027	0.621648	866	3	1.4769
RHOT1	4	0.9145	0.91455	1	17198	0	0.31649	0.010659	0.029032	0.621648	867	1	0.31649
COX14	4	0.9239	0.92406	1	17362	0	1.8813	0.010672	0.029054	0.621648	868	3	1.8813
C14orf2	4	0.93955	0.93967	1	17688	0	1.5125	0.010673	0.029056	0.621648	869	3	1.5125
GTF3C4	4	0.72397	0.72948	1	13699	1	0.86914	0.010735	0.029192	0.623702	870	2	0.86914
PTDSS2	4	0.23564	0.36442	0.995653	6924	1	1.548	0.01076	0.02925	0.623702	871	3	1.548
MRPS18A	2	0.98922	0.98918	1	18668	0	1.749	0.01078	0.020376	0.570926	872	2	1.749
FCF1	2	0.98922	0.98918	1	18667	0	1.5885	0.01078	0.020376	0.570926	873	2	1.5885
MOB1B	4	0.92003	0.92015	1	17292	0	1.6239	0.010787	0.029315	0.623941	874	2	1.6239
CNTNAP2	4	0.78571	0.7856	1	14738	0	1.726	0.010863	0.029494	0.623941	875	2	1.726
DLX6	4	0.782	0.78184	1	14659	1	-0.12435	0.010871	0.029512	0.623941	876	1	-0.12435
DUSP14	4	0.88914	0.8891	1	16732	0	1.0698	0.010871	0.029512	0.623941	877	2	1.0698
ANKLE1	4	0.98636	0.98632	1	18589	0	1.8164	0.010876	0.029528	0.623941	878	2	1.8164
KCTD13	4	0.99459	0.99461	1	18801	0	1.4011	0.010882	0.029542	0.623941	879	3	1.4011
GAS6	3	0.48213	0.51481	1	10720	1	2.4721	0.010941	0.029244	0.623702	880	2	2.4721
ABCB7	2	0.98903	0.98899	1	18664	0	2.1409	0.01097	0.020711	0.570926	881	2	2.1409
CLPX	4	0.9744	0.97455	1	18283	0	1.3263	0.010989	0.029783	0.623941	882	3	1.3263
EXTL1	4	0.17548	0.29802	0.994247	5667	2	0.85568	0.011034	0.029902	0.623941	883	2	0.85568
TBL1XR1	2	0.97672	0.97683	1	18355	0	1.5646	0.011072	0.020906	0.570926	884	2	1.5646
CTSH	4	0.2339	0.3625	0.995653	6889	1	1.5668	0.011123	0.030117	0.623941	885	3	1.5668
GHDC	4	0.43648	0.5511	1	10260	1	1.021	0.011136	0.030141	0.623941	886	2	1.021
TARS2	3	0.5565	0.57098	1	11515	1	2.4859	0.01115	0.029738	0.623941	887	2	2.4859
MIS18A	3	0.86488	0.86491	1	16260	0	0.96319	0.011187	0.029836	0.623941	888	2	0.96319
MKNK2	4	0.53785	0.60381	1	11310	1	0.60454	0.011189	0.030266	0.623941	889	1	0.60454
CORO7-PAM16	4	0.79644	0.79637	1	14938	0	1.488	0.011236	0.030376	0.623941	890	3	1.488
WDR92	4	0.13462	0.25259	0.98698	4836	1	1.3928	0.011265	0.030441	0.623941	891	2	1.3928
SPATA31A5	4	0.94816	0.94821	1	17841	0	1.455	0.011265	0.030441	0.623941	892	2	1.455
PDPK1	4	0.90058	0.90056	1	16938	0	1.0186	0.011265	0.030441	0.623941	893	2	1.0186
MRPL12	4	0.85068	0.85057	1	15976	0	0.91039	0.011265	0.030441	0.623941	894	2	0.91039
MRPL27	4	0.43821	0.55195	1	10276	1	1.4599	0.011265	0.030441	0.623941	895	2	1.4599
POLR2D	4	0.23171	0.36007	0.995653	6834	1	0.75066	0.011265	0.030441	0.623941	896	3	0.75066
ZNF780A	4	0.09925	0.21309	0.975216	4101	2	-0.034511	0.011268	0.030447	0.623941	897	1	-0.034511
LGALS3BP	4	0.97941	0.97953	1	18408	0	1.7413	0.011327	0.030587	0.623941	898	3	1.7413
SP2	4	0.76045	0.76123	1	14277	1	1.5167	0.011379	0.030714	0.623941	899	3	1.5167
KDM5C	4	0.34431	0.48373	1	9054	1	1.6004	0.011425	0.030829	0.623941	900	3	1.6004
ASPM	4	0.32759	0.46532	1	8730	1	0.075517	0.011453	0.030897	0.623941	901	1	0.075517
TMOD4	4	0.069477	0.157	0.971423	3043	2	0.81011	0.011468	0.03093	0.623941	902	2	0.81011
GINS2	2	0.011244	0.021218	0.872663	739	1	0.19191	0.011483	0.021684	0.578498	903	1	0.19191
GCM1	4	0.11448	0.23018	0.983834	4406	1	1.4847	0.011489	0.030972	0.623941	904	3	1.4847
DHODH	4	0.59285	0.63638	1	11933	1	1.3004	0.011489	0.030972	0.623941	905	3	1.3004
RGL4	4	0.1029	0.21716	0.976948	4182	2	0.76634	0.011511	0.031013	0.623941	906	2	0.76634
ANXA2	4	0.8125	0.81245	1	15224	0	1.6926	0.011535	0.031079	0.623941	907	3	1.6926
GABRB3	4	0.037937	0.094033	0.96183	1835	2	-0.4685	0.011559	0.031127	0.623941	908	1	-0.4685
FAM21A	4	0.16641	0.28797	0.991181	5493	1	1.4936	0.011565	0.031146	0.623941	909	3	1.4936
SRP54	1	0.98842	0.98847	1	18653	0	3.9155	0.011576	0.011495	0.481419	910	1	3.9155
METAP1D	4	0.84804	0.84792	1	15911	0	1.1245	0.011593	0.031221	0.623941	911	2	1.1245
PDE5A	4	0.33971	0.47873	1	8970	1	1.6362	0.011594	0.031222	0.623941	912	3	1.6362
UMPS	4	0.89069	0.89066	1	16770	0	1.7032	0.01161	0.031258	0.623941	913	3	1.7032
DSN1	4	0.0318	0.081232	0.944682	1610	1	1.2052	0.011619	0.03128	0.623941	914	3	1.2052
ATF1	4	0.94522	0.94523	1	17799	0	1.7582	0.011707	0.031491	0.623941	915	3	1.7582
CHURC1	4	0.93351	0.93362	1	17555	0	0.70445	0.011718	0.031518	0.623941	916	2	0.70445
SYNGR3	4	0.031621	0.080883	0.944682	1604	2	0.63295	0.011739	0.031571	0.623941	917	2	0.63295
MS4A3	4	0.88214	0.88211	1	16610	0	1.2988	0.011792	0.031707	0.623941	918	2	1.2988
LIN54	4	0.86968	0.86959	1	16373	0	1.5357	0.011808	0.031738	0.623941	919	3	1.5357
PTGES	4	0.7575	0.75858	1	14224	1	2.0013	0.011808	0.031738	0.623941	920	3	2.0013
CTSW	3	0.72386	0.72403	1	13698	0	0.30179	0.011902	0.031237	0.623941	921	1	0.30179
NACA2	4	0.18665	0.31035	0.994275	5902	2	0.41852	0.011929	0.032034	0.623941	922	2	0.41852
FBXO24	4	0.29048	0.42462	1	8017	2	0.018024	0.012035	0.03229	0.623941	923	1	0.018024
UPP2	4	0.8489	0.84879	1	15929	0	1.7843	0.01206	0.032345	0.623941	924	2	1.7843
FMO5	4	0.98963	0.9896	1	18681	0	1.5645	0.012067	0.032362	0.623941	925	3	1.5645
RAB9B	4	0.8675	0.86741	1	16338	0	1.2353	0.012128	0.03251	0.623941	926	2	1.2353
UBE2A	3	0.5198	0.54263	1	11118	1	0.44859	0.01216	0.031657	0.623941	927	1	0.44859
KRT20	4	0.28696	0.42072	1	7951	1	1.592	0.012172	0.032612	0.623941	928	2	1.592
TRMU	4	0.9722	0.97234	1	18252	0	1.5415	0.012172	0.032612	0.623941	929	2	1.5415
HNRNPD	4	0.018446	0.052761	0.925773	1066	2	0.63738	0.012413	0.033184	0.623941	930	2	0.63738
NCOA2	4	0.40565	0.53657	1	9979	1	1.3894	0.012413	0.033184	0.623941	931	2	1.3894
RPL5	2	0.98749	0.98749	1	18616	0	1.9514	0.012511	0.023584	0.578498	932	2	1.9514
GTF3C5	4	0.7518	0.75343	1	14128	1	1.7811	0.012526	0.03343	0.623941	933	3	1.7811
FDXR	4	0.9948	0.9948	1	18809	0	0.74833	0.012585	0.033564	0.623941	934	3	0.74833
SUGT1	4	0.9948	0.9948	1	18814	0	-0.040655	0.012585	0.033564	0.623941	935	3	-0.040655
METTL16	4	0.9145	0.91455	1	17190	0	0.1742	0.012585	0.033564	0.623941	936	3	0.1742
CH17-360D5.1	4	0.16506	0.28646	0.990476	5469	1	0.53938	0.012585	0.033564	0.623941	937	3	0.53938
TADA2A	4	0.96284	0.96286	1	18072	0	-0.20867	0.012585	0.033564	0.623941	938	3	-0.20867
MTIF2	4	0.21136	0.33768	0.995653	6422	1	0.1742	0.012585	0.033564	0.623941	939	3	0.1742
CTPS1	4	0.99387	0.9939	1	18783	0	0.86228	0.012585	0.033564	0.623941	940	3	0.86228
THRAP3	4	0.68459	0.69867	1	13102	1	0.47137	0.012585	0.033564	0.623941	941	3	0.47137
TRAPPC11	4	0.24707	0.37694	0.996502	7168	1	0.54199	0.012585	0.033564	0.623941	942	3	0.54199
SLC30A1	4	0.66607	0.68509	1	12866	1	-0.61478	0.012585	0.033564	0.623941	943	3	-0.61478
RPE	4	0.38523	0.52717	1	9802	1	0.54199	0.012585	0.033564	0.623941	944	3	0.54199
PSMD14	4	0.035987	0.090003	0.959022	1766	1	0.1742	0.012585	0.033564	0.623941	945	3	0.1742
RFT1	4	0.76352	0.76404	1	14335	1	0.20541	0.012585	0.033564	0.623941	946	3	0.20541
ASUN	4	0.90864	0.90864	1	17088	0	1.0681	0.012585	0.033564	0.623941	947	3	1.0681
NSMCE4A	4	0.14248	0.26133	0.988221	4994	1	-0.61478	0.012585	0.033564	0.623941	948	3	-0.61478
URB2	4	0.90006	0.90003	1	16929	0	-0.40008	0.012585	0.033564	0.623941	949	3	-0.40008
LSM8	4	0.98772	0.98771	1	18634	0	0.1742	0.012585	0.033564	0.623941	950	3	0.1742
MRPL44	4	0.19717	0.32192	0.995653	6119	1	0.1742	0.012585	0.033564	0.623941	951	3	0.1742
PDSS2	4	0.58939	0.63423	1	11884	1	0.1742	0.012585	0.033564	0.623941	952	3	0.1742
MCMBP	4	0.03318	0.084172	0.948248	1674	1	0.1742	0.012585	0.033564	0.623941	953	3	0.1742
RACGAP1	4	0.028122	0.073496	0.944682	1459	1	0.4211	0.012585	0.033564	0.623941	954	3	0.4211
TCEB2	4	0.93426	0.93436	1	17570	0	-0.61478	0.012585	0.033564	0.623941	955	3	-0.61478
RPIA	4	0.782	0.78184	1	14661	1	0.59373	0.012585	0.033564	0.623941	956	3	0.59373
FAM195A	4	0.98557	0.98555	1	18565	0	1.1666	0.012585	0.033564	0.623941	957	3	1.1666
UBA3	4	0.9948	0.9948	1	18811	0	-0.040655	0.012585	0.033564	0.623941	958	3	-0.040655
TANGO6	4	0.99258	0.99261	1	18753	0	0.80736	0.012585	0.033564	0.623941	959	3	0.80736
DPH3	4	0.98772	0.98771	1	18621	0	-0.61478	0.012585	0.033564	0.623941	960	3	-0.61478
LIPT1	4	0.16811	0.28983	0.992833	5528	1	0.54199	0.012585	0.033564	0.623941	961	3	0.54199
HK2	4	0.98996	0.98993	1	18688	0	0.77512	0.012585	0.033564	0.623941	962	3	0.77512
HAUS5	4	0.0033319	0.011758	0.832237	258	1	0.54199	0.012585	0.033564	0.623941	963	3	0.54199
UBA52	4	0.99233	0.99236	1	18738	0	0.76149	0.012585	0.033564	0.623941	964	3	0.76149
ATXN2L	4	0.98103	0.98106	1	18451	0	0.97532	0.012585	0.033564	0.623941	965	3	0.97532
RPN2	4	0.57017	0.62245	1	11665	1	0.1742	0.012585	0.033564	0.623941	966	3	0.1742
SCGN	4	0.84638	0.8463	1	15864	0	1.675	0.012646	0.033714	0.625876	967	2	1.675
FYN	4	0.15015	0.26982	0.989034	5156	2	0.82275	0.012708	0.03386	0.627982	968	2	0.82275
PHAX	2	0.7076	0.70734	1	13435	0	1.6081	0.012862	0.024216	0.578498	969	1	1.6081
CDC5L	2	0.85017	0.84991	1	15961	0	1.8195	0.012862	0.024216	0.578498	970	1	1.8195
MRPL32	2	0.90185	0.90169	1	16964	0	1.9427	0.012862	0.024216	0.578498	971	1	1.9427
DCDC2B	4	0.90462	0.9046	1	17020	0	1.5469	0.012864	0.034228	0.632345	972	2	1.5469
TXNRD1	1	0.98713	0.98715	1	18610	0	2.8351	0.01287	0.01278	0.490924	973	1	2.8351
SSU72	1	0.98713	0.98715	1	18609	0	2.8351	0.01287	0.01278	0.490924	974	1	2.8351
CBWD2	4	0.32592	0.46348	1	8701	2	0.94874	0.012951	0.034432	0.635487	975	2	0.94874
UQCC2	4	0.98562	0.9856	1	18568	0	1.9771	0.012965	0.034468	0.635543	976	3	1.9771
RICTOR	3	0.9789	0.97906	1	18398	0	1.7539	0.013019	0.033027	0.623941	977	2	1.7539
THOC3	3	0.98839	0.98855	1	18652	0	1.7539	0.013019	0.033027	0.623941	978	2	1.7539
SMARCA5	3	0.97945	0.97959	1	18409	0	1.7539	0.013019	0.033027	0.623941	979	2	1.7539
AASDHPPT	3	0.53293	0.55258	1	11251	1	1.6988	0.013019	0.033027	0.623941	980	2	1.6988
RPL14	3	0.17595	0.27837	0.990226	5674	1	1.7539	0.013019	0.033027	0.623941	981	2	1.7539
GAS2L1	4	0.96546	0.9655	1	18130	0	1.6405	0.013105	0.034791	0.635673	982	2	1.6405
PELI3	4	0.37431	0.51677	1	9634	1	0.2185	0.013145	0.034875	0.635673	983	1	0.2185
NDUFA3	4	0.3454	0.48492	1	9078	1	0.90508	0.013145	0.034875	0.635673	984	2	0.90508
TRIM49B	4	0.91844	0.91848	1	17253	0	0.75615	0.013145	0.034875	0.635673	985	1	0.75615
DHX36	4	0.13239	0.25008	0.986322	4786	2	-0.010734	0.013145	0.034875	0.635673	986	2	-0.010734
GMNN	4	0.0318	0.081232	0.944682	1617	1	0.97961	0.013145	0.034875	0.635673	987	2	0.97961
ERO1L	4	0.11549	0.23127	0.984631	4427	2	-0.18218	0.013145	0.034875	0.635673	988	1	-0.18218
LOC101927844	4	0.15838	0.27909	0.990226	5324	2	-0.59775	0.013145	0.034875	0.635673	989	1	-0.59775
GOLGA6D	4	0.24574	0.37543	0.996502	7139	1	0.056041	0.013145	0.034875	0.635673	990	1	0.056041
ZNF45	4	0.5905	0.63492	1	11902	1	0.97234	0.013145	0.034875	0.635673	991	2	0.97234
YBEY	4	0.9948	0.9948	1	18808	0	1.0208	0.013145	0.034875	0.635673	992	2	1.0208
RNF40	4	0.015257	0.04567	0.921724	928	2	-0.33575	0.013145	0.034875	0.635673	993	2	-0.33575
ZBTB2	4	0.040089	0.098505	0.96183	1914	2	0.52044	0.013256	0.035146	0.639998	994	2	0.52044
EEF1B2	4	0.79361	0.79355	1	14885	0	1.1549	0.013316	0.035287	0.641344	995	2	1.1549
RPL28	4	0.85096	0.85085	1	15984	0	1.4797	0.013379	0.035433	0.642168	996	2	1.4797
APBB1IP	4	0.62924	0.65977	1	12357	1	1.1813	0.013379	0.035433	0.642168	997	2	1.1813
FAM20B	4	0.99312	0.99314	1	18761	0	1.5086	0.013416	0.035524	0.642997	998	3	1.5086
PTP4A2	4	0.99734	0.99733	1	18903	0	1.8834	0.013425	0.035546	0.642997	999	3	1.8834
NFIL3	4	0.92872	0.92888	1	17455	0	1.4331	0.013493	0.035701	0.645182	1000	2	1.4331
HIF1AN	4	0.90033	0.90031	1	16932	0	1.2832	0.013514	0.035751	0.64548	1001	2	1.2832
NSF	4	0.11533	0.23109	0.984631	4423	1	1.0588	0.013569	0.035885	0.645827	1002	3	1.0588
DAXX	4	0.97562	0.9758	1	18310	0	1.2222	0.013569	0.035885	0.645827	1003	3	1.2222
ACTR10	4	0.032763	0.083297	0.945689	1655	1	1.4266	0.013569	0.035885	0.645827	1004	3	1.4266
CDK1	3	0.81836	0.81833	1	15348	0	-0.18927	0.013609	0.033981	0.628391	1005	2	-0.18927
TUBB8	3	0.11615	0.19806	0.972476	4443	1	1.3836	0.013609	0.033981	0.628391	1006	2	1.3836
PSMD12	3	0.015868	0.041461	0.911162	955	1	1.0944	0.013609	0.033981	0.628391	1007	2	1.0944
RPL17-C18orf32	1	0.98635	0.98637	1	18588	0	3.3287	0.013651	0.01354	0.495971	1008	1	3.3287
UQCRFS1	2	0.98629	0.98633	1	18586	0	1.5755	0.013708	0.025757	0.594377	1009	2	1.5755
S100A12	4	0.055109	0.12887	0.971423	2492	1	1.6433	0.013725	0.036272	0.651197	1010	3	1.6433
SMG1	2	0.84188	0.84166	1	15772	0	2.223	0.01379	0.025902	0.596931	1011	1	2.223
ZNF772	4	0.85952	0.85938	1	16148	0	1.4471	0.013846	0.036568	0.654036	1012	3	1.4471
CCNF	4	0.98402	0.98401	1	18531	0	1.9476	0.013846	0.036568	0.654036	1013	3	1.9476
SFRP4	4	0.70032	0.71056	1	13323	1	1.5025	0.013846	0.036568	0.654036	1014	3	1.5025
AP4B1	4	0.98937	0.98936	1	18678	0	1.3027	0.014119	0.037231	0.663887	1015	3	1.3027
EPX	4	0.60335	0.64298	1	12067	1	0.077761	0.014176	0.037368	0.663887	1016	1	0.077761
CLCC1	4	0.67535	0.69183	1	12980	1	0.55107	0.014176	0.037368	0.663887	1017	1	0.55107
ELF2	4	0.1956	0.32021	0.995449	6091	2	0.44749	0.014176	0.037368	0.663887	1018	2	0.44749
NPIPA8	4	0.63323	0.66241	1	12404	1	0.78225	0.014176	0.037368	0.663887	1019	2	0.78225
SLC9C2	4	0.50517	0.58604	1	10961	1	1.6357	0.014186	0.037389	0.663887	1020	3	1.6357
ZIM2	4	0.65466	0.67707	1	12692	1	2.0349	0.014189	0.037397	0.663887	1021	3	2.0349
CRAMP1L	4	0.32998	0.46799	1	8766	1	1.3357	0.01423	0.037494	0.664897	1022	3	1.3357
CT45A9	4	0.17674	0.29937	0.994247	5690	1	1.785	0.01424	0.037523	0.664897	1023	3	1.785
SRP19	2	0.98575	0.98579	1	18572	0	2.7172	0.014254	0.026716	0.60338	1024	2	2.7172
DPP4	4	0.92755	0.92771	1	17428	0	1.5481	0.014264	0.037589	0.665197	1025	3	1.5481
SEPHS2	4	0.24574	0.37543	0.996502	7135	1	0.93771	0.014313	0.0377	0.666167	1026	2	0.93771
MTG1	4	0.98772	0.98771	1	18622	0	1.5527	0.014371	0.037838	0.667996	1027	3	1.5527
RNF39	3	0.23032	0.34915	0.995653	6807	1	0.078106	0.014402	0.035279	0.641344	1028	1	0.078106
TRIM49D1	4	0.10769	0.22252	0.982109	4266	1	0.41018	0.014413	0.037948	0.66882	1029	1	0.41018
UBE2F	4	0.9757	0.97588	1	18311	0	1.9108	0.014415	0.037955	0.66882	1030	3	1.9108
PARVA	4	0.77078	0.77092	1	14450	1	1.2769	0.014459	0.038057	0.669332	1031	2	1.2769
SLC17A8	4	0.062276	0.14291	0.971423	2763	1	1.437	0.014472	0.03809	0.669332	1032	3	1.437
GEN1	3	0.84189	0.8419	1	15776	0	1.7539	0.01448	0.035421	0.642168	1033	2	1.7539
GTF2H5	4	0.3038	0.43916	1	8258	2	-0.32109	0.014492	0.038138	0.669332	1034	1	-0.32109
B3GALT4	4	0.91805	0.91807	1	17244	0	0.29798	0.014492	0.038138	0.669332	1035	1	0.29798
SRCAP	4	0.98263	0.98266	1	18509	0	1.5373	0.014502	0.038159	0.669332	1036	3	1.5373
CCDC129	4	0.89369	0.89363	1	16824	0	1.6056	0.014517	0.038197	0.669371	1037	3	1.6056
KIR3DL3	4	0.071787	0.1615	0.971423	3124	2	0.68577	0.014555	0.038288	0.670029	1038	2	0.68577
PINK1	4	0.1055	0.22007	0.980565	4229	2	0.70219	0.014584	0.038348	0.670029	1039	2	0.70219
OR1M1	4	0.39424	0.53129	1	9884	1	0.084976	0.014598	0.038375	0.670029	1040	1	0.084976
ZNF492	4	0.5457	0.60826	1	11379	1	1.5596	0.014684	0.038599	0.67088	1041	3	1.5596
RXRG	4	0.0092204	0.030983	0.89135	633	3	-1.3195	0.014704	0.038643	0.67088	1042	1	-1.3195
RUFY3	4	0.14994	0.26959	0.989034	5148	1	0.42259	0.014704	0.038643	0.67088	1043	1	0.42259
ASB4	4	0.90948	0.90949	1	17106	0	1.9269	0.014717	0.038671	0.67088	1044	2	1.9269
REEP2	4	0.92464	0.92479	1	17379	0	1.4195	0.014722	0.038681	0.67088	1045	3	1.4195
RPL36A-HNRNPH2	3	0.088507	0.16022	0.971423	3741	1	-0.21563	0.014779	0.035906	0.645827	1046	1	-0.21563
APITD1-CORT	4	0.92214	0.92229	1	17333	0	1.5546	0.014815	0.038913	0.673272	1047	3	1.5546
WARS2	4	0.99397	0.99401	1	18786	0	1.1965	0.014815	0.038913	0.673272	1048	3	1.1965
NPIPA5	4	0.30743	0.44314	1	8326	1	0.61947	0.014836	0.038963	0.673523	1049	2	0.61947
ZC3H14	4	0.95051	0.95058	1	17884	0	1.3069	0.014887	0.039112	0.674676	1050	2	1.3069
KCNJ4	4	0.14069	0.25935	0.987284	4958	2	0.5526	0.014887	0.039112	0.674676	1051	2	0.5526
WDR93	4	0.66607	0.68509	1	12865	1	1.8234	0.014895	0.039136	0.674676	1052	3	1.8234
HNRNPK	3	0.98429	0.98446	1	18537	0	1.7854	0.014979	0.036219	0.65086	1053	2	1.7854
ARF1	4	0.38328	0.52627	1	9794	1	1.6872	0.014985	0.039359	0.676697	1054	3	1.6872
GPM6B	4	0.98638	0.98634	1	18590	0	1.9015	0.015044	0.039503	0.678466	1055	3	1.9015
PLK4	3	0.5884	0.59705	1	11876	1	0.0836	0.015076	0.036375	0.652428	1056	1	0.0836
ZNF580	4	0.5566	0.61452	1	11518	1	1.6816	0.015083	0.039586	0.678466	1057	3	1.6816
UGGT1	4	0.0318	0.081232	0.944682	1614	2	-0.61657	0.015099	0.039629	0.678466	1058	1	-0.61657
COX7B2	4	0.31385	0.45031	1	8456	1	1.775	0.015111	0.039658	0.678466	1059	2	1.775
ESF1	4	0.53518	0.6023	1	11279	1	1.269	0.015125	0.039698	0.678466	1060	3	1.269
DNAJC17	4	0.56833	0.62137	1	11642	1	1.6846	0.015129	0.039711	0.678466	1061	3	1.6846
FCGRT	4	0.49392	0.58016	1	10845	1	1.1199	0.015152	0.039755	0.678612	1062	2	1.1199
ZNF235	4	0.33339	0.4717	1	8844	1	1.1447	0.015205	0.039865	0.679872	1063	2	1.1447
RPP25	4	0.94571	0.94574	1	17808	0	1.3867	0.015228	0.039917	0.680149	1064	3	1.3867
FAM65B	4	0.23779	0.36678	0.995653	6972	2	-0.05244	0.015258	0.039976	0.680558	1065	1	-0.05244
C5orf30	4	0.97983	0.97993	1	18414	0	1.6995	0.015307	0.040097	0.681555	1066	3	1.6995
LYVE1	4	0.22201	0.34941	0.995653	6639	2	0.24569	0.01531	0.040106	0.681555	1067	2	0.24569
IL23R	4	0.63898	0.66627	1	12482	1	1.0633	0.015336	0.040163	0.681826	1068	2	1.0633
NCOA1	4	0.4594	0.56245	1	10489	1	1.4994	0.015348	0.040194	0.681826	1069	3	1.4994
CHRNB2	4	0.79251	0.79244	1	14866	0	1.3772	0.015366	0.04024	0.682012	1070	2	1.3772
TFE3	4	0.12944	0.2468	0.986322	4711	1	0.32543	0.015416	0.04035	0.682918	1071	1	0.32543
FCGR1A	4	0.97366	0.9738	1	18270	0	1.5292	0.015519	0.040607	0.684826	1072	3	1.5292
RPUSD2	4	0.50324	0.58506	1	10940	1	0.10907	0.015522	0.040613	0.684826	1073	1	0.10907
ARRDC5	4	0.97188	0.97203	1	18248	0	1.6776	0.015525	0.040622	0.684826	1074	2	1.6776
GTPBP3	4	0.99174	0.99176	1	18721	0	1.4941	0.015605	0.040806	0.684964	1075	3	1.4941
DNAI2	4	0.99233	0.99236	1	18741	0	1.5965	0.015605	0.040806	0.684964	1076	3	1.5965
KIT	4	0.20454	0.33009	0.995653	6276	2	0.84174	0.015624	0.040855	0.684964	1077	2	0.84174
STK10	4	0.96829	0.96835	1	18178	0	1.8213	0.015647	0.040911	0.684964	1078	3	1.8213
ACTA1	4	0.7266	0.73167	1	13741	1	1.2084	0.015662	0.040947	0.684964	1079	2	1.2084
COPS7A	4	0.87357	0.87354	1	16462	0	1.5688	0.015669	0.040962	0.684964	1080	2	1.5688
ZFAT	4	0.89663	0.89659	1	16871	0	1.0752	0.0157	0.041043	0.684964	1081	2	1.0752
IRF2BP1	4	0.7222	0.72799	1	13669	1	0.97159	0.0157	0.041043	0.684964	1082	2	0.97159
DUSP10	4	0.99191	0.99193	1	18728	0	1.4398	0.015707	0.041061	0.684964	1083	3	1.4398
WDFY2	4	0.84124	0.84112	1	15762	0	0.045489	0.015838	0.041373	0.685381	1084	1	0.045489
DTD1	4	0.95634	0.95637	1	17962	0	0.88654	0.015838	0.041373	0.685381	1085	2	0.88654
TSR3	4	0.0070776	0.024132	0.882448	499	2	-0.76876	0.015838	0.041373	0.685381	1086	1	-0.76876
HIST2H3C	4	0.038166	0.094507	0.96183	1845	1	0.5189	0.015838	0.041373	0.685381	1087	2	0.5189
ZMYM3	4	0.037362	0.092887	0.96183	1811	1	0.61948	0.015838	0.041373	0.685381	1088	2	0.61948
CCNL1	4	0.84446	0.84434	1	15830	0	0.23468	0.015838	0.041373	0.685381	1089	1	0.23468
HOXA1	4	0.43716	0.55143	1	10267	1	-0.10857	0.015838	0.041373	0.685381	1090	1	-0.10857
NGLY1	4	0.11246	0.22794	0.983834	4355	1	0.57844	0.015838	0.041373	0.685381	1091	2	0.57844
POLR2C	3	0.059316	0.11962	0.966203	2655	1	0.96319	0.015848	0.03761	0.665197	1092	2	0.96319
MAN2B1	4	0.20986	0.33602	0.995653	6386	2	0.95946	0.015852	0.041413	0.685448	1093	2	0.95946
CNNM2	4	0.55108	0.61133	1	11451	1	1.5235	0.015893	0.041512	0.686056	1094	3	1.5235
SLC31A1	4	0.94902	0.94906	1	17853	0	1.8051	0.015921	0.041581	0.686056	1095	3	1.8051
SMS	4	0.41144	0.53929	1	10030	1	1.2923	0.015977	0.041732	0.686056	1096	3	1.2923
PPAP2A	4	0.7376	0.74078	1	13913	1	1.7514	0.016117	0.042057	0.686056	1097	3	1.7514
MAPK7	4	0.045661	0.10986	0.96183	2140	1	1.3275	0.016117	0.042057	0.686056	1098	2	1.3275
UBE2C	4	0.71417	0.72136	1	13549	1	1.6028	0.016127	0.042077	0.686056	1099	3	1.6028
CDK2AP1	4	0.926	0.92615	1	17399	0	1.427	0.016145	0.04212	0.686056	1100	3	1.427
PLA2G1B	4	0.9367	0.93678	1	17625	0	1.4183	0.016165	0.042171	0.686056	1101	3	1.4183
TP53TG3B	4	0.69661	0.70768	1	13278	1	1.4446	0.016187	0.042217	0.686056	1102	2	1.4446
CDC14B	4	0.73203	0.73614	1	13823	1	1.7353	0.016233	0.042324	0.686056	1103	3	1.7353
GTF2F2	3	0.85584	0.85587	1	16066	0	1.8059	0.016305	0.038362	0.670029	1104	2	1.8059
RBMY1E	4	0.077015	0.17151	0.971423	3313	2	-0.31166	0.016313	0.04253	0.686056	1105	1	-0.31166
IFT74	4	0.34249	0.48175	1	9017	2	0.60533	0.016365	0.042656	0.686056	1106	2	0.60533
PGAP3	4	0.79614	0.79607	1	14933	0	0.99511	0.016373	0.04267	0.686056	1107	2	0.99511
TWSG1	4	0.90416	0.90416	1	17007	0	0.80766	0.016418	0.042769	0.686056	1108	1	0.80766
PCNA	2	0.82662	0.82622	1	15490	0	1.9731	0.016452	0.030598	0.623941	1109	1	1.9731
CAV2	3	0.36108	0.43384	1	9382	1	2.1995	0.016487	0.038665	0.67088	1110	2	2.1995
UMAD1	4	0.70462	0.71384	1	13397	1	0.82406	0.016497	0.042947	0.686056	1111	2	0.82406
BABAM1	4	0.31638	0.45308	1	8509	1	-0.32721	0.016497	0.042947	0.686056	1112	1	-0.32721
CSNK1A1	3	0.42148	0.47291	1	10115	1	2.0463	0.016507	0.038705	0.67088	1113	2	2.0463
ADAMTS4	4	0.2907	0.42486	1	8023	2	-0.070326	0.016576	0.043143	0.686118	1114	1	-0.070326
ZMPSTE24	4	0.57361	0.62447	1	11703	1	1.8416	0.016595	0.043184	0.686198	1115	3	1.8416
SLC4A10	4	0.089964	0.19605	0.971734	3791	2	0.076007	0.016629	0.043268	0.686961	1116	2	0.076007
CACNA1I	4	0.81622	0.81617	1	15299	0	1.4589	0.016702	0.043424	0.688868	1117	3	1.4589
MED12	2	0.97672	0.97683	1	18332	0	1.7234	0.01673	0.03108	0.623941	1118	2	1.7234
HAUS3	2	0.9832	0.98324	1	18519	0	2.2273	0.016796	0.031206	0.623941	1119	2	2.2273
AGT	4	0.44781	0.55661	1	10367	1	0.15578	0.016813	0.043676	0.691136	1120	1	0.15578
THOP1	4	0.035987	0.090003	0.959022	1765	2	-0.42146	0.016813	0.043676	0.691136	1121	1	-0.42146
FAM98A	4	0.66127	0.68167	1	12788	1	1.3452	0.016813	0.043676	0.691136	1122	2	1.3452
SRP14	3	0.015036	0.039416	0.909652	919	1	0.53347	0.016898	0.039313	0.676513	1123	1	0.53347
PHKG2	4	0.0077437	0.026212	0.88535	546	2	-0.64268	0.016945	0.043988	0.695172	1124	1	-0.64268
ERCC4	4	0.9861	0.98609	1	18581	0	1.5194	0.016951	0.044004	0.695172	1125	3	1.5194
YRDC	1	0.98296	0.98303	1	18515	0	3.3102	0.017041	0.016992	0.535102	1126	1	3.3102
CCDC65	4	0.78772	0.78761	1	14761	0	1.515	0.01705	0.044246	0.698413	1127	3	1.515
HAGHL	4	0.59492	0.63767	1	11959	1	0.1591	0.017103	0.044371	0.698688	1128	1	0.1591
LIG3	3	0.018441	0.047771	0.925773	1062	1	1.1382	0.017115	0.039664	0.678466	1129	2	1.1382
TRERF1	4	0.91158	0.91156	1	17141	0	1.3628	0.017123	0.044422	0.698688	1130	3	1.3628
PABPC1L2A	4	0.0014425	0.0051614	0.704486	135	3	-1.7593	0.017156	0.044491	0.698688	1131	1	-1.7593
SLC34A3	4	0.60218	0.64225	1	12050	1	1.5427	0.017192	0.044581	0.698688	1132	3	1.5427
YAF2	4	0.85066	0.85055	1	15975	0	1.4561	0.017211	0.044624	0.698688	1133	3	1.4561
MECR	4	0.9725	0.97264	1	18254	0	1.6307	0.017231	0.04467	0.698688	1134	3	1.6307
GPR151	4	0.09481	0.20509	0.974335	3957	3	-0.61041	0.017314	0.04487	0.698688	1135	1	-0.61041
RHBDF1	4	0.75783	0.75887	1	14227	1	0.96741	0.017488	0.045258	0.698688	1136	2	0.96741
LGALS9B	4	0.8154	0.81535	1	15279	0	1.3278	0.017488	0.045258	0.698688	1137	2	1.3278
KLF16	4	0.50212	0.58446	1	10927	1	1.4172	0.017488	0.045258	0.698688	1138	3	1.4172
POLD3	4	0.86063	0.86048	1	16177	0	0.97503	0.017488	0.045258	0.698688	1139	2	0.97503
CAMK1	4	0.099747	0.21364	0.975216	4113	2	0.52432	0.017488	0.045258	0.698688	1140	2	0.52432
PPIE	4	0.96271	0.96272	1	18070	0	1.1539	0.017488	0.045258	0.698688	1141	2	1.1539
ALG14	4	0.56581	0.61991	1	11611	1	0.89065	0.017488	0.045258	0.698688	1142	2	0.89065
KLC3	4	0.12727	0.24435	0.986322	4668	1	0.80184	0.017488	0.045258	0.698688	1143	2	0.80184
ARHGAP19	4	0.86579	0.86573	1	16306	0	1.1204	0.017488	0.045258	0.698688	1144	2	1.1204
SIPA1L3	4	0.96552	0.96556	1	18133	0	1.2934	0.017488	0.045258	0.698688	1145	2	1.2934
ZFP36	4	0.37407	0.5165	1	9630	1	1.3104	0.017488	0.045258	0.698688	1146	3	1.3104
BCLAF1	4	0.63491	0.66351	1	12431	1	1.1231	0.017488	0.045258	0.698688	1147	2	1.1231
ZMAT5	4	0.8098	0.80975	1	15164	0	0.95078	0.017488	0.045258	0.698688	1148	2	0.95078
OR2T27	4	0.070551	0.15908	0.971423	3077	2	0.24295	0.017488	0.045258	0.698688	1149	2	0.24295
LPA	4	0.20901	0.33509	0.995653	6369	1	1.4207	0.017507	0.045307	0.698688	1150	3	1.4207
CD34	4	0.10636	0.22104	0.980565	4245	1	1.4324	0.017515	0.045325	0.698688	1151	3	1.4324
MEPCE	3	0.96311	0.96334	1	18080	0	0.9125	0.01759	0.040442	0.683611	1152	2	0.9125
TM2D3	4	0.54577	0.60831	1	11381	1	1.4673	0.017619	0.045549	0.701584	1153	3	1.4673
SLC19A1	4	0.96222	0.96224	1	18059	0	1.3355	0.017693	0.045711	0.703501	1154	3	1.3355
POTEA	4	0.88011	0.8801	1	16578	0	1.4403	0.017716	0.045765	0.703772	1155	3	1.4403
PBX3	4	0.90221	0.90221	1	16974	0	1.4377	0.01782	0.046002	0.70628	1156	3	1.4377
SEC61G	3	0.96311	0.96334	1	18084	0	1.8309	0.017943	0.041011	0.684964	1157	2	1.8309
IQGAP1	4	0.87662	0.87661	1	16519	0	1.3713	0.017959	0.046306	0.707657	1158	3	1.3713
RNF125	4	0.9744	0.97455	1	18284	0	1.3417	0.01798	0.046352	0.707657	1159	3	1.3417
NDUFB8	1	0.982	0.98207	1	18496	0	2.8526	0.018001	0.017959	0.550141	1160	1	2.8526
FTH1	4	0.19052	0.31467	0.994275	5981	1	1.0288	0.018062	0.046551	0.707657	1161	3	1.0288
POLR1A	4	0.24574	0.37543	0.996502	7140	1	0.1742	0.018062	0.046551	0.707657	1162	3	0.1742
TUBA1A	4	0.18442	0.30788	0.994275	5853	1	1.0288	0.018062	0.046551	0.707657	1163	3	1.0288
TAS2R60	4	0.98534	0.98533	1	18562	0	1.6022	0.018062	0.046551	0.707657	1164	3	1.6022
CCT2	2	0.98193	0.98198	1	18468	0	1.5734	0.018073	0.033499	0.623941	1165	2	1.5734
RPS3A	2	0.98193	0.98198	1	18479	0	1.3917	0.018073	0.033499	0.623941	1166	2	1.3917
GINS3	2	0.98193	0.98198	1	18484	0	1.4873	0.018073	0.033499	0.623941	1167	2	1.4873
C9orf114	2	0.98193	0.98198	1	18473	0	1.331	0.018073	0.033499	0.623941	1168	2	1.331
MRPL41	2	0.98193	0.98198	1	18476	0	0.96319	0.018073	0.033499	0.623941	1169	2	0.96319
NOL9	2	0.98193	0.98198	1	18490	0	1.1161	0.018073	0.033499	0.623941	1170	2	1.1161
POLR2J	2	0.98193	0.98198	1	18469	0	0.96319	0.018073	0.033499	0.623941	1171	2	0.96319
SNRPD2	2	0.98193	0.98198	1	18485	0	0.96319	0.018073	0.033499	0.623941	1172	2	0.96319
CHAF1B	2	0.98193	0.98198	1	18471	0	0.96319	0.018073	0.033499	0.623941	1173	2	0.96319
NOL6	2	0.98193	0.98198	1	18493	0	1.1912	0.018073	0.033499	0.623941	1174	2	1.1912
NFS1	2	0.98193	0.98198	1	18483	0	1.1161	0.018073	0.033499	0.623941	1175	2	1.1161
MAD2L2	2	0.98193	0.98198	1	18489	0	1.6771	0.018073	0.033499	0.623941	1176	2	1.6771
TP53RK	2	0.98193	0.98198	1	18478	0	0.96319	0.018073	0.033499	0.623941	1177	2	0.96319
SAP18	2	0.98193	0.98198	1	18486	0	1.519	0.018073	0.033499	0.623941	1178	2	1.519
NOP58	2	0.98193	0.98198	1	18487	0	1.7545	0.018073	0.033499	0.623941	1179	2	1.7545
RPL4	2	0.98193	0.98198	1	18480	0	1.331	0.018073	0.033499	0.623941	1180	2	1.331
PSMD2	2	0.98193	0.98198	1	18482	0	1.5734	0.018073	0.033499	0.623941	1181	2	1.5734
SOD2	2	0.98193	0.98198	1	18470	0	1.331	0.018073	0.033499	0.623941	1182	2	1.331
RABGGTA	2	0.98193	0.98198	1	18475	0	1.8992	0.018073	0.033499	0.623941	1183	2	1.8992
MCL1	2	0.98193	0.98198	1	18474	0	1.331	0.018073	0.033499	0.623941	1184	2	1.331
IPPK	2	0.98193	0.98198	1	18492	0	1.331	0.018073	0.033499	0.623941	1185	2	1.331
CAPZB	2	0.98193	0.98198	1	18488	0	1.5396	0.018073	0.033499	0.623941	1186	2	1.5396
UBA2	2	0.98193	0.98198	1	18477	0	1.1932	0.018073	0.033499	0.623941	1187	2	1.1932
PET117	2	0.98193	0.98198	1	18472	0	1.8992	0.018073	0.033499	0.623941	1188	2	1.8992
ST6GALNAC6	4	0.30901	0.44489	1	8358	2	-0.055676	0.018104	0.046648	0.707657	1189	1	-0.055676
SLU7	4	0.0040239	0.014092	0.845624	301	3	-1.5981	0.018104	0.046648	0.707657	1190	1	-1.5981
PCM1	4	0.79871	0.79867	1	14972	0	-0.048832	0.018104	0.046648	0.707657	1191	1	-0.048832
TM6SF1	4	0.54114	0.6057	1	11338	1	0.82272	0.018104	0.046648	0.707657	1192	2	0.82272
PRDX6	4	0.91868	0.91873	1	17260	0	1.7678	0.018104	0.046648	0.707657	1193	3	1.7678
RFXAP	4	0.98689	0.98683	1	18599	0	1.16	0.018104	0.046648	0.707657	1194	2	1.16
CYP3A5	4	0.9152	0.91526	1	17208	0	0.80994	0.018104	0.046648	0.707657	1195	2	0.80994
OR9K2	4	0.86952	0.86943	1	16368	0	0.072691	0.018104	0.046648	0.707657	1196	1	0.072691
VPS52	2	0.64474	0.64454	1	12559	0	1.403	0.018119	0.033577	0.623941	1197	1	1.403
TUFM	2	0.88917	0.889	1	16744	0	1.0157	0.018119	0.033577	0.623941	1198	1	1.0157
ATP5J2-PTCD1	2	0.97672	0.97683	1	18351	0	1.2306	0.018119	0.033577	0.623941	1199	2	1.2306
RPAP2	2	0.82458	0.8242	1	15451	0	1.6538	0.018119	0.033577	0.623941	1200	1	1.6538
COQ2	2	0.97137	0.97146	1	18246	0	2.1354	0.018119	0.033577	0.623941	1201	2	2.1354
WDR82	2	0.97672	0.97683	1	18353	0	1.2306	0.018119	0.033577	0.623941	1202	2	1.2306
CTNNBL1	3	0.96311	0.96334	1	18095	0	0.66765	0.018282	0.041546	0.686056	1203	1	0.66765
SFTPA2	4	0.66713	0.68584	1	12886	1	1.3771	0.018325	0.047161	0.710912	1204	3	1.3771
LRSAM1	4	0.91135	0.91132	1	17139	0	1.8707	0.018451	0.047461	0.714868	1205	3	1.8707
KLK2	4	0.95818	0.95819	1	17992	0	1.3572	0.018499	0.047578	0.715801	1206	3	1.3572
PCDH9	4	0.99399	0.99404	1	18787	0	1.5887	0.018641	0.047904	0.718586	1207	3	1.5887
GPR174	4	0.96298	0.963	1	18076	0	1.6822	0.018665	0.047963	0.718586	1208	3	1.6822
ST8SIA5	4	0.91506	0.91511	1	17205	0	1.4592	0.018685	0.048002	0.718586	1209	3	1.4592
VCL	4	0.72467	0.73005	1	13713	1	1.4065	0.01869	0.048015	0.718586	1210	2	1.4065
COG2	4	0.87993	0.87995	1	16575	0	1.3352	0.018707	0.048046	0.718586	1211	2	1.3352
LCA5	4	0.8877	0.88767	1	16705	0	1.2761	0.018752	0.048138	0.718825	1212	2	1.2761
BEST4	4	0.74409	0.74649	1	14018	1	0.94922	0.018752	0.048138	0.718825	1213	2	0.94922
GBP4	4	0.98566	0.98564	1	18570	0	1.3003	0.018807	0.048253	0.719667	1214	3	1.3003
ADAM10	4	0.83686	0.83681	1	15666	0	1.4495	0.018813	0.048269	0.719667	1215	3	1.4495
C1QTNF8	4	0.97776	0.97795	1	18376	0	1.3135	0.018864	0.048376	0.720405	1216	3	1.3135
PPT2	4	0.81835	0.8183	1	15347	0	1.003	0.018872	0.048394	0.720405	1217	2	1.003
PRRT3	4	0.8124	0.81234	1	15218	0	0.92209	0.018946	0.048574	0.722514	1218	2	0.92209
TARDBP	4	0.98772	0.98771	1	18625	0	0.96319	0.018981	0.04865	0.722615	1219	3	0.96319
ACSL6	4	0.33619	0.47485	1	8896	2	0.41223	0.018999	0.048697	0.722615	1220	2	0.41223
POMP	4	0.00029354	0.0010872	0.617101	26	1	1.2657	0.019003	0.048707	0.722615	1221	3	1.2657
MYDGF	4	0.67783	0.69367	1	13005	1	1.2985	0.019013	0.048732	0.722615	1222	2	1.2985
BRIP1	4	0.98424	0.98422	1	18535	0	1.122	0.019104	0.048946	0.725221	1223	2	1.122
CCDC144A	4	0.97015	0.97021	1	18217	0	1.7263	0.019147	0.049037	0.72567	1224	3	1.7263
SMKR1	4	0.94276	0.94286	1	17750	0	1.6223	0.019151	0.049052	0.72567	1225	3	1.6223
PBK	4	0.89502	0.89499	1	16849	0	1.3333	0.019176	0.049111	0.725982	1226	3	1.3333
DEFB128	4	0.59317	0.63659	1	11938	1	1.2736	0.019205	0.04918	0.72602	1227	2	1.2736
BET1L	4	0.88585	0.88582	1	16675	0	1.4424	0.019209	0.049192	0.72602	1228	2	1.4424
FAM21C	4	0.098488	0.21172	0.975216	4075	1	1.4497	0.019222	0.049228	0.72602	1229	2	1.4497
RAD51C	3	0.021666	0.055679	0.92648	1197	2	-1.284	0.019231	0.043114	0.686118	1230	1	-1.284
GPN3	3	0.14225	0.23337	0.986074	4991	1	0.4888	0.019231	0.043114	0.686118	1231	1	0.4888
POLR2G	3	0.98506	0.98523	1	18557	0	0.96319	0.019231	0.043114	0.686118	1232	2	0.96319
MALSU1	3	0.65582	0.6568	1	12707	1	-0.56105	0.019231	0.043114	0.686118	1233	1	-0.56105
PTGDR2	4	0.28294	0.41635	1	7859	2	0.11029	0.019262	0.049324	0.726874	1234	1	0.11029
LRCH4	4	0.62634	0.65782	1	12325	1	1.2103	0.019283	0.049382	0.727169	1235	3	1.2103
LRRC2	4	0.4441	0.55482	1	10334	1	0.89314	0.019314	0.049468	0.727868	1236	2	0.89314
CELF5	4	0.84987	0.84976	1	15948	0	1.3024	0.019431	0.049741	0.731107	1237	2	1.3024
KLHL10	4	0.99685	0.99689	1	18882	0	1.5025	0.019441	0.049765	0.731107	1238	3	1.5025
SLC26A2	4	0.99669	0.99673	1	18879	0	1.521	0.01947	0.049829	0.731303	1239	3	1.521
KIF20A	4	0.80884	0.80876	1	15150	0	1.269	0.019505	0.049905	0.731303	1240	3	1.269
LAX1	4	0.74695	0.74901	1	14057	1	1.4844	0.019505	0.049905	0.731303	1241	3	1.4844
ANGEL2	4	0.51704	0.5924	1	11100	1	1.1863	0.01954	0.049979	0.731303	1242	2	1.1863
PRKAB2	4	0.044069	0.10667	0.96183	2069	2	0.53743	0.019625	0.050162	0.731303	1243	2	0.53743
PHF5A	1	0.98036	0.98042	1	18426	0	2.5458	0.019636	0.019637	0.564275	1244	1	2.5458
EEF1A1	1	0.98036	0.98042	1	18425	0	2.5458	0.019636	0.019637	0.564275	1245	1	2.5458
CYTIP	4	0.78871	0.78862	1	14790	0	0.88579	0.019654	0.050235	0.731303	1246	2	0.88579
MAGED4	4	0.84417	0.84406	1	15827	0	0.43532	0.019656	0.050238	0.731303	1247	2	0.43532
TOLLIP	4	0.48332	0.57464	1	10728	1	0.23688	0.019656	0.050238	0.731303	1248	1	0.23688
AKAP12	4	0.7029	0.71255	1	13369	1	0.20205	0.019656	0.050238	0.731303	1249	1	0.20205
CCNB1	4	0.98772	0.98771	1	18623	0	-0.040655	0.019656	0.050238	0.731303	1250	2	-0.040655
LNX2	4	0.18561	0.3092	0.994275	5879	1	1.0169	0.019656	0.050238	0.731303	1251	2	1.0169
RNF166	4	0.14466	0.26377	0.988221	5038	2	0.2349	0.019656	0.050238	0.731303	1252	2	0.2349
SRGAP1	4	0.72099	0.72701	1	13655	1	1.3057	0.019733	0.050428	0.732361	1253	3	1.3057
TNFAIP8L2	4	0.26683	0.39862	1	7551	1	0.98606	0.019764	0.050502	0.732361	1254	2	0.98606
CLUH	4	0.27475	0.40726	1	7697	1	0.95613	0.019764	0.050502	0.732361	1255	2	0.95613
SEC24B	4	0.97124	0.97135	1	18241	0	1.2688	0.019876	0.050784	0.735887	1256	3	1.2688
GSPT1	4	0.98131	0.98134	1	18460	0	1.1851	0.019973	0.051016	0.738687	1257	3	1.1851
LRR1	3	0.83515	0.83514	1	15636	0	0.96319	0.019982	0.044321	0.698688	1258	2	0.96319
LBHD1	4	0.9882	0.98819	1	18646	0	1.6273	0.020014	0.051104	0.738873	1259	2	1.6273
TMEM100	4	0.99221	0.99222	1	18735	0	1.5302	0.020015	0.051106	0.738873	1260	3	1.5302
DNAJC16	4	0.32094	0.45801	1	8602	1	1.0132	0.020051	0.051188	0.738931	1261	2	1.0132
WWP2	4	0.93361	0.93371	1	17559	0	0.80378	0.020051	0.051188	0.738931	1262	2	0.80378
MIB2	4	0.99336	0.9934	1	18768	0	1.4665	0.020104	0.05132	0.74028	1263	3	1.4665
ANAPC15	4	0.73344	0.7373	1	13843	1	1.3406	0.020121	0.051359	0.740282	1264	3	1.3406
TNRC6C	4	0.78111	0.78097	1	14639	1	1.5036	0.020194	0.051523	0.74108	1265	3	1.5036
USP17L8	4	0.030783	0.07916	0.944682	1570	1	0.1111	0.020235	0.051618	0.74108	1266	1	0.1111
COG7	4	0.84408	0.84396	1	15825	0	0.19228	0.020235	0.051618	0.74108	1267	1	0.19228
FAM206A	4	0.88779	0.88776	1	16706	0	1.4176	0.020255	0.051663	0.74108	1268	3	1.4176
TUBD1	3	0.012498	0.03307	0.898634	812	1	1.9348	0.020268	0.044815	0.698688	1269	2	1.9348
VSIG8	4	0.71694	0.72364	1	13590	1	1.1032	0.02027	0.051694	0.74108	1270	2	1.1032
SSC5D	4	0.83139	0.83144	1	15570	0	1.5106	0.020296	0.051749	0.74108	1271	2	1.5106
C14orf119	4	0.96201	0.96202	1	18054	0	1.6067	0.020356	0.051881	0.74108	1272	2	1.6067
APLP2	4	0.89052	0.89049	1	16767	0	1.5781	0.020364	0.051902	0.74108	1273	3	1.5781
KCNAB2	4	0.82011	0.82007	1	15379	0	0.33482	0.020366	0.051906	0.74108	1274	1	0.33482
SCN8A	4	0.83966	0.83958	1	15724	0	1.1198	0.020382	0.051938	0.74108	1275	2	1.1198
MFSD9	4	0.27668	0.40942	1	7730	1	1.5568	0.020409	0.051997	0.74108	1276	3	1.5568
CYP17A1	4	0.85163	0.8515	1	15996	0	1.5712	0.020428	0.052044	0.74108	1277	3	1.5712
IGBP1	3	0.22175	0.33816	0.995653	6631	1	-0.48361	0.020436	0.045099	0.698688	1278	1	-0.48361
AP4S1	4	0.62756	0.65862	1	12334	1	1.2222	0.020442	0.052074	0.74108	1279	2	1.2222
H2AFZ	4	0.94954	0.94959	1	17859	0	1.3008	0.020442	0.052074	0.74108	1280	2	1.3008
MANF	4	0.85329	0.85321	1	16023	0	1.2204	0.020442	0.052074	0.74108	1281	2	1.2204
OR5K1	4	0.21995	0.34713	0.995653	6596	2	0.53343	0.020445	0.05208	0.74108	1282	2	0.53343
NTPCR	4	0.9517	0.95175	1	17902	0	1.2761	0.020461	0.052113	0.74108	1283	3	1.2761
SYT11	4	0.2868	0.42054	1	7947	2	-0.4525	0.020524	0.052269	0.741224	1284	1	-0.4525
LEFTY2	4	0.77277	0.77282	1	14492	1	1.6609	0.020528	0.052279	0.741224	1285	2	1.6609
EXOC1	4	0.64381	0.66956	1	12545	1	1.3092	0.020629	0.052526	0.743621	1286	2	1.3092
NACAD	4	0.79404	0.79401	1	14898	0	1.1943	0.020681	0.052636	0.744095	1287	2	1.1943
MARK2	4	0.98654	0.98649	1	18595	0	1.415	0.020682	0.05264	0.744095	1288	3	1.415
SSMEM1	4	0.18643	0.31011	0.994275	5899	1	1.3054	0.0207	0.052676	0.744095	1289	3	1.3054
CEBPZ	1	0.97929	0.97934	1	18404	0	3.1642	0.02071	0.02067	0.570926	1290	1	3.1642
HLA-C	4	0.031227	0.080099	0.944682	1590	1	-0.093331	0.020734	0.05275	0.744293	1291	1	-0.093331
GDAP1	4	0.17767	0.3004	0.994247	5711	1	1.1807	0.020769	0.052835	0.744293	1292	2	1.1807
LRRC58	4	0.30969	0.44567	1	8370	1	1.2276	0.020795	0.05289	0.744293	1293	3	1.2276
TSPAN12	4	0.56065	0.61688	1	11564	1	1.0743	0.020795	0.052891	0.744293	1294	2	1.0743
KIAA1551	4	0.63455	0.66327	1	12425	1	1.7143	0.020804	0.052904	0.744293	1295	2	1.7143
CD2BP2	4	0.69061	0.70319	1	13188	1	1.0168	0.020813	0.052924	0.744293	1296	2	1.0168
ATP5A1	2	0.97672	0.97683	1	18357	0	1.4846	0.020841	0.038546	0.67088	1297	2	1.4846
CCDC101	4	0.35356	0.4939	1	9222	2	0.8493	0.020847	0.053004	0.744625	1298	2	0.8493
OR2T10	4	0.24962	0.37972	0.996502	7219	1	1.7293	0.020856	0.053026	0.744625	1299	3	1.7293
FANCD2	4	0.018773	0.053446	0.925773	1080	3	-1.153	0.020891	0.053097	0.745082	1300	1	-1.153
EIF3B	3	0.11319	0.19411	0.971734	4375	1	-0.61478	0.02091	0.045889	0.705103	1301	2	-0.61478
PIP5K1C	4	0.97327	0.97343	1	18263	0	1.5365	0.020917	0.053157	0.745371	1302	2	1.5365
C1orf159	4	0.9822	0.98221	1	18500	0	0.80491	0.020944	0.053217	0.74566	1303	2	0.80491
GFRA2	4	0.94835	0.94841	1	17845	0	1.3953	0.020978	0.053294	0.745769	1304	3	1.3953
CT47A12	4	0.14649	0.26576	0.988221	5081	1	1.2689	0.020995	0.053339	0.745769	1305	3	1.2689
MMP26	4	0.86021	0.86006	1	16168	0	-0.18898	0.020997	0.053342	0.745769	1306	1	-0.18898
KCNU1	3	0.52506	0.54657	1	11173	1	0.88724	0.021008	0.046046	0.706381	1307	1	0.88724
ETNPPL	4	0.94733	0.9474	1	17832	0	1.3503	0.021054	0.053465	0.746949	1308	3	1.3503
SLC22A23	4	0.45979	0.56264	1	10491	1	-0.33522	0.021075	0.053513	0.747068	1309	1	-0.33522
SPATA17	4	0.98862	0.98862	1	18656	0	1.1921	0.021154	0.053706	0.748372	1310	2	1.1921
PSMA1	2	0.97879	0.97886	1	18394	0	1.2152	0.021207	0.039213	0.675399	1311	2	1.2152
NFYC	4	0.89846	0.89838	1	16898	0	1.6192	0.021212	0.053833	0.748372	1312	3	1.6192
PTBP1	4	0.98889	0.98888	1	18661	0	1.6361	0.021248	0.053909	0.748372	1313	3	1.6361
CXCL9	4	0.25082	0.38103	0.996502	7249	2	0.61438	0.021259	0.053931	0.748372	1314	2	0.61438
PPM1E	4	0.89897	0.89892	1	16909	0	1.1605	0.021312	0.054054	0.748372	1315	3	1.1605
TMPPE	4	0.056694	0.13202	0.971423	2553	1	1.0206	0.021318	0.054065	0.748372	1316	2	1.0206
CDK5RAP3	4	0.22633	0.35417	0.995653	6731	2	0.63539	0.021364	0.054162	0.748372	1317	2	0.63539
CDC123	4	0.9372	0.93729	1	17638	0	1.4825	0.021407	0.05425	0.748372	1318	3	1.4825
CHCHD4	4	0.56595	0.61998	1	11613	1	0.95078	0.021407	0.05425	0.748372	1319	3	0.95078
TH	4	0.96887	0.96893	1	18187	0	1.4055	0.021407	0.05425	0.748372	1320	3	1.4055
CLP1	4	0.24574	0.37543	0.996502	7141	1	-0.61478	0.021407	0.05425	0.748372	1321	3	-0.61478
VWA9	4	0.11448	0.23018	0.983834	4409	1	1.2814	0.021407	0.05425	0.748372	1322	3	1.2814
MEN1	4	0.98772	0.98771	1	18636	0	0.95078	0.021407	0.05425	0.748372	1323	3	0.95078
NCL	4	0.34885	0.48871	1	9136	1	0.95078	0.021407	0.05425	0.748372	1324	3	0.95078
MRPS36	4	0.48647	0.57631	1	10759	1	1.245	0.021407	0.05425	0.748372	1325	3	1.245
FAM127B	4	0.76514	0.76552	1	14365	1	1.3515	0.021407	0.05425	0.748372	1326	3	1.3515
SEC16A	4	0.0053314	0.018431	0.853901	399	3	-1.1146	0.021417	0.054273	0.748372	1327	1	-1.1146
LTK	4	0.10154	0.21564	0.976073	4152	2	0.5531	0.021489	0.054449	0.749136	1328	2	0.5531
ZNF613	4	0.73356	0.73739	1	13845	1	0.008666	0.021522	0.054525	0.749136	1329	1	0.008666
EPPIN-WFDC6	4	0.32706	0.46476	1	8718	2	-0.41098	0.021522	0.054525	0.749136	1330	1	-0.41098
STK39	4	0.11445	0.23016	0.983834	4405	2	-0.49563	0.021522	0.054525	0.749136	1331	1	-0.49563
TEX35	4	0.99401	0.99406	1	18789	0	1.1222	0.021627	0.054762	0.751852	1332	2	1.1222
RADIL	4	0.97424	0.97439	1	18279	0	1.2747	0.02174	0.055033	0.753574	1333	3	1.2747
NRG4	4	0.67006	0.68794	1	12919	1	1.3654	0.021758	0.055072	0.753574	1334	2	1.3654
HMGA1	4	0.012071	0.038493	0.909652	787	3	-0.81451	0.021784	0.055128	0.753574	1335	1	-0.81451
RGPD5	4	0.94183	0.94192	1	17730	0	1.235	0.021811	0.055194	0.753574	1336	2	1.235
INSRR	4	0.94518	0.94519	1	17794	0	1.6704	0.021847	0.055271	0.753574	1337	3	1.6704
FEN1	2	0.97815	0.97823	1	18383	0	1.9728	0.021853	0.040365	0.682918	1338	2	1.9728
SKP2	3	0.42833	0.4775	1	10177	1	1.9446	0.021971	0.047598	0.715801	1339	2	1.9446
TAF13	4	0.99157	0.99161	1	18719	0	1.3321	0.021973	0.055556	0.753574	1340	3	1.3321
THAP1	4	0.13914	0.25766	0.987284	4926	1	1.0103	0.021973	0.055556	0.753574	1341	3	1.0103
EIF4EBP1	4	0.0084334	0.028405	0.89135	582	1	1.1083	0.021973	0.055556	0.753574	1342	3	1.1083
SMO	4	0.95458	0.95461	1	17943	0	1.5113	0.021973	0.055556	0.753574	1343	3	1.5113
CERS3	4	0.4564	0.5609	1	10450	1	-0.082876	0.022021	0.055664	0.753574	1344	1	-0.082876
PRB2	4	0.12356	0.24026	0.986322	4597	1	0.075633	0.022021	0.055664	0.753574	1345	1	0.075633
DCUN1D1	4	0.42206	0.54428	1	10123	1	1.3222	0.022031	0.055684	0.753574	1346	3	1.3222
MYC	2	0.97794	0.97802	1	18379	0	1.1535	0.02206	0.040761	0.684964	1347	2	1.1535
FOXD4L1	4	0.33928	0.47827	1	8961	1	1.0145	0.022077	0.055792	0.753574	1348	2	1.0145
CNOT1	4	0.12573	0.24267	0.986322	4640	1	0.8783	0.022077	0.055792	0.753574	1349	2	0.8783
B4GALT1	4	0.56093	0.61706	1	11568	1	1.4363	0.022077	0.055792	0.753574	1350	2	1.4363
TAF7L	4	0.86513	0.86506	1	16264	0	1.2584	0.022085	0.055811	0.753574	1351	3	1.2584
RPS5	3	0.57028	0.58205	1	11667	1	2.031	0.022126	0.047842	0.718586	1352	2	2.031
PCBP1	4	0.74235	0.74494	1	13979	1	1.1177	0.022171	0.05601	0.753574	1353	3	1.1177
APOBEC2	4	0.86719	0.86708	1	16332	0	1.2751	0.022175	0.056023	0.753574	1354	2	1.2751
MTMR1	4	0.43017	0.54814	1	10189	1	1.0934	0.02222	0.056124	0.754278	1355	2	1.0934
LPPR2	3	0.18144	0.28572	0.990476	5796	1	1.9952	0.022229	0.048001	0.718586	1356	2	1.9952
NHLRC4	4	0.73602	0.73941	1	13886	1	1.08	0.022246	0.056182	0.754324	1357	2	1.08
SNRPB2	4	0.79085	0.79076	1	14831	0	0.91711	0.022257	0.056207	0.754324	1358	2	0.91711
ZKSCAN8	4	0.082932	0.18282	0.971423	3520	1	1.2851	0.022288	0.05628	0.754328	1359	3	1.2851
EML3	4	0.34336	0.48267	1	9034	2	0.87073	0.022291	0.056286	0.754328	1360	2	0.87073
HIST2H4A	4	0.18838	0.31226	0.994275	5934	2	0.62797	0.022309	0.056329	0.754369	1361	2	0.62797
FAM228A	4	0.38857	0.52866	1	9830	1	0.37405	0.022414	0.05658	0.7572	1362	1	0.37405
CDC45	1	0.97756	0.97762	1	18374	0	3.3501	0.022438	0.022389	0.578498	1363	1	3.3501
ASAP1	4	0.91681	0.91687	1	17224	0	1.122	0.022466	0.056696	0.7577	1364	2	1.122
ALS2	4	0.39924	0.53363	1	9926	1	1.5048	0.022593	0.056989	0.76107	1365	3	1.5048
MTRNR2L6	4	0.015099	0.045344	0.921724	922	2	0.15976	0.022624	0.057047	0.761169	1366	2	0.15976
RBFOX1	4	0.087874	0.19215	0.971734	3720	1	1.2163	0.022636	0.057076	0.761169	1367	2	1.2163
LPAR2	4	0.71267	0.72014	1	13523	1	1.3919	0.022652	0.057117	0.76119	1368	3	1.3919
CDH13	4	0.62975	0.66011	1	12363	1	0.069746	0.022677	0.05717	0.761364	1369	1	0.069746
PKN1	4	0.65655	0.67841	1	12718	1	1.6621	0.022695	0.057213	0.761406	1370	3	1.6621
LYRM2	4	0.99005	0.99002	1	18689	0	1.4667	0.022778	0.05741	0.763259	1371	3	1.4667
TMEM205	4	0.0055131	0.019037	0.858279	408	1	1.0683	0.022794	0.057441	0.763259	1372	3	1.0683
HMSD	4	0.23728	0.36621	0.995653	6961	1	0.94064	0.022821	0.057497	0.763259	1373	2	0.94064
LBX2	4	0.272	0.40424	1	7643	2	0.7058	0.02288	0.05762	0.763259	1374	2	0.7058
SRRM1	4	0.89807	0.898	1	16890	0	0.54939	0.022886	0.057632	0.763259	1375	1	0.54939
GOLGA6L10	4	0.40492	0.53625	1	9973	1	1.0557	0.022916	0.057699	0.763616	1376	3	1.0557
KRT14	4	0.85591	0.85584	1	16068	0	0.61511	0.022939	0.057741	0.763642	1377	2	0.61511
IPCEF1	4	0.17068	0.29273	0.99386	5579	1	1.3279	0.023011	0.057919	0.764857	1378	3	1.3279
EXO1	4	0.81773	0.8177	1	15333	0	1.0976	0.023038	0.057982	0.764857	1379	2	1.0976
GPR19	4	0.65366	0.67636	1	12675	1	0.58184	0.023044	0.057993	0.764857	1380	1	0.58184
CHSY3	4	0.7166	0.72335	1	13585	1	0.98581	0.023096	0.058103	0.765778	1381	2	0.98581
LIX1	4	0.17638	0.299	0.994247	5684	2	0.65527	0.023129	0.058189	0.766377	1382	2	0.65527
GPR108	4	0.77934	0.77915	1	14608	1	1.7141	0.023211	0.058375	0.768293	1383	3	1.7141
MYH4	4	0.15851	0.27921	0.990226	5328	2	0.90241	0.023229	0.058424	0.768412	1384	2	0.90241
BCOR	4	0.79147	0.79139	1	14842	0	1.3802	0.023254	0.058473	0.768523	1385	3	1.3802
ARFRP1	2	0.97672	0.97683	1	18329	0	0.1742	0.023284	0.042959	0.686056	1386	2	0.1742
TTC27	2	0.97672	0.97683	1	18349	0	0.1742	0.023284	0.042959	0.686056	1387	2	0.1742
IMP4	2	0.97672	0.97683	1	18350	0	0.54199	0.023284	0.042959	0.686056	1388	2	0.54199
MRPL51	2	0.97672	0.97683	1	18354	0	0.1742	0.023284	0.042959	0.686056	1389	2	0.1742
BUB3	2	0.97672	0.97683	1	18341	0	0.1742	0.023284	0.042959	0.686056	1390	2	0.1742
RPL27A	2	0.97672	0.97683	1	18326	0	0.1742	0.023284	0.042959	0.686056	1391	2	0.1742
SMC2	2	0.97672	0.97683	1	18347	0	0.54199	0.023284	0.042959	0.686056	1392	2	0.54199
NEDD8	2	0.97672	0.97683	1	18346	0	-0.61478	0.023284	0.042959	0.686056	1393	2	-0.61478
TRIAP1	2	0.97672	0.97683	1	18348	0	-0.61478	0.023284	0.042959	0.686056	1394	2	-0.61478
MRPL17	2	0.97672	0.97683	1	18336	0	0.72997	0.023284	0.042959	0.686056	1395	2	0.72997
RPL35A	2	0.97672	0.97683	1	18356	0	1.1315	0.023284	0.042959	0.686056	1396	2	1.1315
COA6	2	0.97672	0.97683	1	18342	0	1.1189	0.023284	0.042959	0.686056	1397	2	1.1189
MRPS34	2	0.97672	0.97683	1	18343	0	0.1742	0.023284	0.042959	0.686056	1398	2	0.1742
HCFC1	2	0.97672	0.97683	1	18327	0	0.1742	0.023284	0.042959	0.686056	1399	2	0.1742
RPS21	2	0.97672	0.97683	1	18328	0	1.0834	0.023284	0.042959	0.686056	1400	2	1.0834
RPS19	2	0.97672	0.97683	1	18339	0	-0.61478	0.023284	0.042959	0.686056	1401	2	-0.61478
EIF6	2	0.97672	0.97683	1	18345	0	0.54199	0.023284	0.042959	0.686056	1402	2	0.54199
PGD	2	0.97672	0.97683	1	18337	0	0.1742	0.023284	0.042959	0.686056	1403	2	0.1742
RPP21	2	0.97672	0.97683	1	18338	0	0.7844	0.023284	0.042959	0.686056	1404	2	0.7844
RRN3	2	0.97672	0.97683	1	18333	0	1.4641	0.023284	0.042959	0.686056	1405	2	1.4641
UROD	2	0.97672	0.97683	1	18330	0	0.7844	0.023284	0.042959	0.686056	1406	2	0.7844
PSMC3	2	0.97672	0.97683	1	18358	0	0.56954	0.023284	0.042959	0.686056	1407	2	0.56954
HSPA5	2	0.97672	0.97683	1	18335	0	0.45091	0.023284	0.042959	0.686056	1408	2	0.45091
HARS2	2	0.97672	0.97683	1	18334	0	0.56954	0.023284	0.042959	0.686056	1409	2	0.56954
NDUFA1	2	0.97672	0.97683	1	18331	0	0.96552	0.023284	0.042959	0.686056	1410	2	0.96552
SMIM7	4	0.73401	0.73777	1	13852	1	1.3599	0.023338	0.058664	0.769972	1411	2	1.3599
LRRC37A2	4	0.41445	0.54069	1	10063	1	-0.099826	0.023385	0.058777	0.770397	1412	2	-0.099826
BIN3	4	0.89638	0.89635	1	16864	0	0.49121	0.023385	0.058777	0.770397	1413	1	0.49121
B4GALNT1	4	0.90864	0.90864	1	17086	0	1.2461	0.023408	0.058825	0.770493	1414	3	1.2461
NAT8	4	0.084556	0.18588	0.971423	3588	2	0.89485	0.023457	0.058936	0.771418	1415	2	0.89485
DSE	4	0.54423	0.60741	1	11368	1	1.0195	0.02353	0.059105	0.773102	1416	2	1.0195
SRGAP2	4	0.043804	0.10613	0.96183	2058	2	0.50603	0.023631	0.059333	0.775556	1417	2	0.50603
TMEM242	4	0.98036	0.98042	1	18424	0	1.6393	0.023705	0.059509	0.776677	1418	2	1.6393
ABTB2	4	0.72651	0.73159	1	13739	1	1.2445	0.023724	0.059548	0.776677	1419	3	1.2445
TIMMDC1	3	0.26226	0.37493	0.996502	7454	1	1.808	0.023732	0.050392	0.732361	1420	2	1.808
ZNF443	4	0.97093	0.97102	1	18232	0	1.4361	0.023738	0.059582	0.776677	1421	3	1.4361
MIDN	4	0.99103	0.99104	1	18706	0	1.3861	0.023766	0.059649	0.776965	1422	3	1.3861
WDR4	3	0.87645	0.87655	1	16516	0	1.7861	0.023785	0.050488	0.732361	1423	2	1.7861
PDGFB	4	0.34565	0.4852	1	9084	2	-0.15118	0.02383	0.059788	0.776965	1424	1	-0.15118
SPDYE3	4	0.22925	0.35739	0.995653	6788	1	0.87711	0.02383	0.059788	0.776965	1425	2	0.87711
NF2	4	0.71869	0.7251	1	13619	1	1.3946	0.023838	0.059807	0.776965	1426	2	1.3946
MRPS24	4	0.92495	0.92509	1	17385	0	1.1763	0.023838	0.059807	0.776965	1427	2	1.1763
GGN	4	0.97373	0.97387	1	18273	0	1.5321	0.023894	0.05993	0.777504	1428	3	1.5321
PA2G4	4	0.9289	0.92905	1	17460	0	0.86603	0.023935	0.060026	0.777607	1429	2	0.86603
MED13	4	0.74963	0.75138	1	14100	1	1.382	0.023936	0.06003	0.777607	1430	3	1.382
ADCK4	4	0.99287	0.9929	1	18758	0	1.3296	0.023951	0.06006	0.777607	1431	3	1.3296
ZNF574	4	0.26217	0.39357	1	7451	1	0.41949	0.02404	0.060277	0.778712	1432	2	0.41949
POM121C	4	0.98256	0.98259	1	18508	0	0.81275	0.024062	0.06033	0.778712	1433	3	0.81275
FAM9B	4	0.49017	0.57814	1	10803	1	1.4709	0.024083	0.060368	0.778712	1434	2	1.4709
FUNDC2	4	0.22551	0.35332	0.995653	6708	1	0.83592	0.02412	0.060454	0.778712	1435	2	0.83592
S100A5	4	0.099862	0.21377	0.975216	4117	2	0.52794	0.024145	0.060509	0.778712	1436	2	0.52794
LSM14A	4	0.92785	0.92802	1	17433	0	1.4138	0.024157	0.060533	0.778712	1437	2	1.4138
THEM5	4	0.87777	0.87774	1	16531	0	1.1796	0.024166	0.060554	0.778712	1438	2	1.1796
COMMD3-BMI1	4	0.98159	0.98162	1	18466	0	1.4573	0.024209	0.060657	0.778983	1439	3	1.4573
FOXRED1	1	0.9757	0.97577	1	18312	0	2.6463	0.0243	0.024214	0.578498	1440	1	2.6463
CEP120	4	0.057544	0.13362	0.971423	2578	3	-0.67415	0.024302	0.060863	0.780578	1441	1	-0.67415
HELB	4	0.37135	0.5135	1	9568	2	-0.33172	0.024302	0.060863	0.780578	1442	1	-0.33172
CKLF-CMTM1	4	0.98978	0.98975	1	18684	0	1.4051	0.024412	0.0611	0.783099	1443	2	1.4051
BCAT1	4	0.67695	0.69303	1	12994	1	1.2406	0.024485	0.061242	0.784394	1444	3	1.2406
SHOX2	4	0.26202	0.39341	1	7446	1	-0.053969	0.024512	0.061301	0.784625	1445	2	-0.053969
MRPL3	2	0.97546	0.97558	1	18307	0	0.26979	0.024538	0.045186	0.698688	1446	2	0.26979
HINFP	2	0.97546	0.97558	1	18308	0	1.0588	0.024538	0.045186	0.698688	1447	2	1.0588
MOV10L1	4	0.11643	0.23233	0.985061	4448	2	0.45218	0.024616	0.061532	0.787046	1448	2	0.45218
USP17L17	4	0.55561	0.61395	1	11507	1	1.2937	0.024638	0.061581	0.787079	1449	3	1.2937
ATP6V1A	4	0.95458	0.95461	1	17942	0	0.99778	0.024687	0.061682	0.787079	1450	3	0.99778
NAT10	3	0.5601	0.57389	1	11556	1	1.8951	0.024692	0.051964	0.74108	1451	2	1.8951
MRTO4	3	0.93672	0.93692	1	17627	0	1.863	0.024814	0.052163	0.741224	1452	2	1.863
BCAN	4	0.26329	0.39483	1	7478	2	0.58298	0.024875	0.062112	0.787079	1453	2	0.58298
SCFD1	4	0.30511	0.44062	1	8288	1	0.80279	0.024875	0.062112	0.787079	1454	2	0.80279
ARF4	4	0.66584	0.68493	1	12862	1	0.85102	0.024875	0.062112	0.787079	1455	2	0.85102
SPDYC	4	0.30692	0.44259	1	8316	1	1.2699	0.024875	0.062112	0.787079	1456	2	1.2699
LEMD1	4	0.00099103	0.0035816	0.697464	94	2	-0.27488	0.024875	0.062112	0.787079	1457	2	-0.27488
TOM1	4	0.80422	0.80416	1	15069	0	0.68969	0.024875	0.062112	0.787079	1458	2	0.68969
SOBP	4	0.78496	0.78484	1	14724	1	0.63608	0.024875	0.062112	0.787079	1459	2	0.63608
CENPO	4	0.017735	0.051191	0.925773	1038	2	0.53761	0.024875	0.062112	0.787079	1460	2	0.53761
RAB21	4	0.22034	0.34756	0.995653	6602	1	0.752	0.024875	0.062112	0.787079	1461	2	0.752
PCDHGB5	4	0.027233	0.07164	0.944682	1417	2	0.35659	0.024875	0.062112	0.787079	1462	2	0.35659
WAC	4	0.30088	0.43598	1	8200	1	1.3049	0.024875	0.062112	0.787079	1463	2	1.3049
PMPCB	4	0.095398	0.20613	0.97445	3975	1	1.1437	0.024875	0.062112	0.787079	1464	2	1.1437
SRRT	3	0.93929	0.9395	1	17680	0	1.6851	0.024879	0.052277	0.741224	1465	2	1.6851
SNRNP48	4	0.71406	0.72126	1	13548	1	1.0713	0.024924	0.062239	0.787986	1466	3	1.0713
ZNF324B	4	0.23538	0.36414	0.995653	6920	1	1.524	0.024936	0.062266	0.787986	1467	3	1.524
RAB11A	3	0.86183	0.86185	1	16202	0	1.954	0.024985	0.052459	0.743225	1468	2	1.954
TRIB2	4	0.97346	0.97361	1	18266	0	1.5701	0.025023	0.062463	0.78995	1469	3	1.5701
TBC1D16	4	0.91897	0.91904	1	17265	0	1.4543	0.02505	0.062513	0.790063	1470	3	1.4543
ABCF3	4	0.91749	0.91754	1	17234	0	1.3025	0.025126	0.062689	0.791768	1471	3	1.3025
FAM173A	4	0.52356	0.59598	1	11163	1	1.2309	0.025231	0.062924	0.794204	1472	3	1.2309
CLEC18A	4	0.55027	0.61086	1	11438	1	1.2188	0.025267	0.063	0.794641	1473	3	1.2188
CDS1	4	0.82879	0.82875	1	15525	0	1.7125	0.025334	0.063167	0.795031	1474	3	1.7125
SLC7A6OS	4	0.99351	0.99355	1	18773	0	1.2177	0.025338	0.063176	0.795031	1475	3	1.2177
GLIS2	4	0.93528	0.93537	1	17596	0	1.2407	0.0254	0.063307	0.795031	1476	3	1.2407
SELENBP1	4	0.9865	0.98645	1	18594	0	1.5337	0.0254	0.063307	0.795031	1477	3	1.5337
DGKA	4	0.9771	0.97731	1	18368	0	1.5222	0.025441	0.063397	0.795031	1478	2	1.5222
ATP5L	4	0.10923	0.22428	0.982579	4298	1	0.29162	0.025559	0.063656	0.795031	1479	1	0.29162
GLTSCR2	4	0.73889	0.7419	1	13934	1	-0.15576	0.025559	0.063656	0.795031	1480	1	-0.15576
STX18	4	0.81597	0.81592	1	15295	0	0.58677	0.025559	0.063656	0.795031	1481	2	0.58677
DYNC1H1	4	0.83728	0.83723	1	15677	0	0.54663	0.025559	0.063656	0.795031	1482	1	0.54663
CKMT2	4	0.16394	0.28521	0.990476	5445	2	-0.63449	0.025559	0.063656	0.795031	1483	1	-0.63449
NCAPG	4	0.82137	0.82133	1	15398	0	-0.19161	0.025559	0.063656	0.795031	1484	2	-0.19161
MDC1	4	0.046417	0.11136	0.96183	2178	2	-0.84483	0.025559	0.063656	0.795031	1485	1	-0.84483
POTEF	4	0.035987	0.090003	0.959022	1773	2	-0.51004	0.025559	0.063656	0.795031	1486	1	-0.51004
RFC2	2	0.58901	0.58906	1	11879	0	1.2218	0.025575	0.047034	0.709557	1487	1	1.2218
RPL19	2	0.027945	0.051229	0.925773	1448	1	-0.31838	0.025575	0.047034	0.709557	1488	1	-0.31838
NHP2	2	0.90452	0.90436	1	17018	0	1.7194	0.025575	0.047034	0.709557	1489	1	1.7194
MRPL28	2	0.28655	0.31341	0.994275	7933	1	0.89671	0.025575	0.047034	0.709557	1490	1	0.89671
TBCD	2	0.53795	0.53812	1	11313	0	1.1665	0.025575	0.047034	0.709557	1491	1	1.1665
NAA50	2	0.13921	0.20008	0.972737	4928	1	0.70999	0.025575	0.047034	0.709557	1492	1	0.70999
SARNP	4	0.81486	0.8148	1	15264	0	1.0938	0.02564	0.063829	0.795342	1493	2	1.0938
EQTN	4	0.817	0.81696	1	15321	0	1.1669	0.025653	0.063861	0.795342	1494	3	1.1669
LMF1	4	0.76696	0.76729	1	14392	1	1.1473	0.025671	0.063897	0.795342	1495	3	1.1473
TXNDC16	4	0.21121	0.33752	0.995653	6418	2	0.68692	0.025678	0.063913	0.795342	1496	2	0.68692
ANK2	4	0.14318	0.2621	0.988221	5010	2	0.57813	0.025688	0.063931	0.795342	1497	2	0.57813
NUDT19	4	0.79172	0.79164	1	14847	0	1.4475	0.025708	0.063973	0.795353	1498	3	1.4475
NOC3L	4	0.95973	0.95975	1	18014	0	0.66689	0.025762	0.064092	0.796305	1499	3	0.66689
GID8	4	0.84747	0.84735	1	15904	0	1.3037	0.025793	0.064158	0.796544	1500	2	1.3037
ST8SIA4	4	0.9822	0.98221	1	18501	0	1.3107	0.025807	0.064194	0.796544	1501	3	1.3107
MRPL50	4	0.17272	0.29498	0.994247	5616	1	0.22046	0.025881	0.06435	0.797963	1502	3	0.22046
RAB1A	4	0.96089	0.9609	1	18032	0	1.213	0.025936	0.064471	0.798936	1503	3	1.213
OR2A5	4	0.98026	0.98035	1	18423	0	1.4615	0.025956	0.064517	0.798989	1504	3	1.4615
IL13	4	0.41087	0.53902	1	10024	1	0.90215	0.025994	0.064602	0.799282	1505	2	0.90215
FBXO44	4	0.94279	0.94289	1	17751	0	1.2275	0.026006	0.064624	0.799282	1506	3	1.2275
NSUN2	4	0.55561	0.61395	1	11505	1	1.0471	0.026032	0.064683	0.799483	1507	2	1.0471
MORF4L1	4	0.99119	0.99121	1	18711	0	1.5184	0.026076	0.064777	0.800138	1508	3	1.5184
KIAA0196	4	0.9948	0.9948	1	18810	0	1.4987	0.026109	0.064857	0.8006	1509	2	1.4987
ZIC4	4	0.99652	0.99656	1	18876	0	1.297	0.026191	0.065055	0.802009	1510	3	1.297
POU5F1B	4	0.85358	0.85349	1	16030	0	1.0332	0.026191	0.065055	0.802009	1511	3	1.0332
FUT5	4	0.1286	0.24585	0.986322	4693	2	0.60999	0.026277	0.065245	0.803318	1512	2	0.60999
PTH2	4	0.86692	0.86681	1	16326	0	1.3159	0.026277	0.065245	0.803318	1513	2	1.3159
MAEA	4	0.9841	0.98409	1	18533	0	1.5634	0.026331	0.065378	0.804414	1514	3	1.5634
TBX10	4	0.50757	0.58733	1	10996	1	1.4397	0.026386	0.065495	0.80484	1515	3	1.4397
ATG4D	4	0.5717	0.62337	1	11683	1	1.4533	0.026462	0.065658	0.805508	1516	3	1.4533
JCHAIN	4	0.36095	0.50202	1	9378	1	1.1037	0.026484	0.065711	0.805508	1517	2	1.1037
RRP7A	4	0.088123	0.19261	0.971734	3728	1	1.0953	0.026498	0.065736	0.805508	1518	2	1.0953
RAB7A	4	0.0092288	0.031013	0.89135	634	1	1.0228	0.026527	0.065792	0.805508	1519	2	1.0228
SSR2	4	0.60463	0.64379	1	12084	1	1.4501	0.026532	0.065803	0.805508	1520	3	1.4501
MED10	3	0.057816	0.11752	0.964956	2591	1	1.5794	0.026534	0.054887	0.752486	1521	2	1.5794
ANAPC5	3	0.010988	0.029363	0.89135	730	1	1.5794	0.026534	0.054887	0.752486	1522	2	1.5794
SUMO4	4	0.28117	0.41444	1	7814	1	0.72145	0.026606	0.065982	0.807181	1523	1	0.72145
SPACA7	4	0.86782	0.86771	1	16343	0	1.1171	0.02671	0.066249	0.809501	1524	2	1.1171
HIST1H3B	4	0.82363	0.82361	1	15434	0	1.1625	0.02677	0.066383	0.809501	1525	3	1.1625
FBXL18	4	0.99471	0.99474	1	18803	0	1.285	0.02677	0.066383	0.809501	1526	3	1.285
WDR59	4	0.95768	0.9577	1	17982	0	1.0412	0.02677	0.066383	0.809501	1527	3	1.0412
GPX8	4	0.72266	0.72839	1	13677	1	1.208	0.026789	0.066426	0.809501	1528	2	1.208
PHF12	4	0.84916	0.84905	1	15933	0	1.4676	0.026789	0.066426	0.809501	1529	2	1.4676
TRAPPC5	4	0.58939	0.63423	1	11896	1	-0.60457	0.026815	0.066478	0.80961	1530	1	-0.60457
TMEM33	4	0.51985	0.59391	1	11122	1	1.4322	0.026852	0.066552	0.809979	1531	2	1.4322
SUSD2	4	0.74963	0.75138	1	14099	1	0.35842	0.026867	0.066593	0.809979	1532	1	0.35842
PIGF	4	0.98394	0.98393	1	18529	0	1.4582	0.026902	0.066684	0.810566	1533	3	1.4582
SUSD4	4	0.60805	0.64593	1	12119	1	0.82346	0.026972	0.066836	0.811903	1534	2	0.82346
EXOSC9	3	0.60897	0.61465	1	12127	1	-0.64613	0.027054	0.055718	0.753574	1535	1	-0.64613
WDR70	3	0.19453	0.303	0.994247	6076	1	1.4053	0.027054	0.055718	0.753574	1536	2	1.4053
ATP5SL	3	0.047101	0.10219	0.96183	2206	2	-1.0131	0.027054	0.055718	0.753574	1537	1	-1.0131
CDK11B	4	0.030081	0.077653	0.944682	1540	2	0.36342	0.027071	0.067041	0.813108	1538	2	0.36342
TANC2	4	0.98691	0.98685	1	18600	0	1.2804	0.027096	0.067097	0.813108	1539	3	1.2804
ACRV1	4	0.99349	0.99352	1	18772	0	1.6161	0.027125	0.067161	0.813108	1540	2	1.6161
UGP2	4	0.08143	0.17999	0.971423	3459	1	0.26246	0.027155	0.067234	0.813108	1541	2	0.26246
ZNF418	4	0.77472	0.77466	1	14525	1	0.38264	0.027155	0.067234	0.813108	1542	1	0.38264
GAGE2A	4	0.38623	0.5276	1	9811	1	0.27555	0.027155	0.067234	0.813108	1543	1	0.27555
GPR132	4	0.90766	0.90766	1	17069	0	1.0218	0.027155	0.067234	0.813108	1544	2	1.0218
TPM3	4	0.060743	0.1399	0.971423	2704	2	0.49902	0.027242	0.067436	0.814529	1545	2	0.49902
BHLHE41	4	0.40851	0.53788	1	10001	1	0.90206	0.02734	0.067656	0.814529	1546	2	0.90206
FIBP	4	0.47547	0.57058	1	10660	1	1.4697	0.027408	0.067788	0.814529	1547	2	1.4697
GPRASP1	4	0.91116	0.91115	1	17137	0	1.4011	0.02743	0.067836	0.814529	1548	3	1.4011
FAM227A	4	0.2655	0.39721	1	7523	1	1.2964	0.02745	0.067881	0.814529	1549	3	1.2964
TMEM150C	4	0.64193	0.66829	1	12517	1	1.0913	0.027477	0.067936	0.814529	1550	2	1.0913
METTL2B	4	0.44172	0.55366	1	10309	1	1.1877	0.027477	0.067936	0.814529	1551	2	1.1877
FAM110C	4	0.097624	0.2102	0.975216	4046	1	1.3592	0.027484	0.067956	0.814529	1552	3	1.3592
COX5B	4	0.98772	0.98771	1	18627	0	1.0955	0.027494	0.067981	0.814529	1553	3	1.0955
MAGOH	4	0.98772	0.98771	1	18633	0	1.2101	0.027543	0.068086	0.814529	1554	3	1.2101
KRTAP16-1	4	0.46728	0.56637	1	10562	1	0.71057	0.027573	0.06815	0.814529	1555	2	0.71057
GPI	4	0.069107	0.15629	0.971423	3024	3	-0.78912	0.027573	0.06815	0.814529	1556	1	-0.78912
CUL1	4	0.88824	0.88821	1	16715	0	1.2492	0.027579	0.068165	0.814529	1557	3	1.2492
SLC25A16	4	0.53164	0.60033	1	11238	1	1.647	0.02761	0.068238	0.814529	1558	3	1.647
SMG9	4	0.87959	0.87962	1	16564	0	0.85951	0.027651	0.068329	0.814529	1559	2	0.85951
MAP1LC3C	4	0.98956	0.98952	1	18680	0	1.1395	0.027659	0.068348	0.814529	1560	3	1.1395
SPTLC1	4	0.28081	0.41405	1	7810	1	0.82398	0.027674	0.068382	0.814529	1561	2	0.82398
SMARCD1	4	0.41486	0.5409	1	10067	1	1.2465	0.027703	0.068456	0.814529	1562	3	1.2465
LHX4	4	0.1221	0.23866	0.986322	4559	1	1.5104	0.027703	0.068456	0.814529	1563	3	1.5104
GPR152	4	0.43078	0.54842	1	10196	1	1.025	0.027733	0.068521	0.814529	1564	2	1.025
MAFG	4	0.95039	0.95045	1	17880	0	1.1472	0.027758	0.068581	0.814529	1565	3	1.1472
ACTN2	4	0.33738	0.47619	1	8923	2	0.86589	0.027772	0.068616	0.814529	1566	2	0.86589
LTB	4	0.8153	0.81524	1	15275	0	1.2848	0.027782	0.068639	0.814529	1567	2	1.2848
C8orf82	4	0.34369	0.48302	1	9042	1	0.28106	0.027799	0.068684	0.814529	1568	3	0.28106
USP10	4	0.99719	0.9972	1	18896	0	1.3445	0.027799	0.068684	0.814529	1569	3	1.3445
STAP1	4	0.23976	0.36887	0.995653	7018	1	1.5843	0.027815	0.068717	0.814529	1570	3	1.5843
ACTL9	4	0.45284	0.55912	1	10414	1	1.3457	0.027891	0.068879	0.814882	1571	2	1.3457
DEF6	4	0.93262	0.93271	1	17535	0	1.0556	0.02793	0.068955	0.814882	1572	2	1.0556
FANCC	4	0.098784	0.21226	0.975216	4086	1	1.4111	0.02793	0.068955	0.814882	1573	2	1.4111
NUDT9	4	0.99678	0.99682	1	18880	0	1.2182	0.027932	0.06896	0.814882	1574	3	1.2182
LRCOL1	4	0.45695	0.56118	1	10457	1	1.2922	0.027992	0.069105	0.81565	1575	3	1.2922
TESK2	4	0.68165	0.69649	1	13057	1	0.91824	0.027994	0.069111	0.81565	1576	2	0.91824
TMEM183A	4	0.87111	0.87106	1	16409	0	0.73938	0.028017	0.069161	0.815739	1577	2	0.73938
ZBTB44	4	0.92553	0.92567	1	17394	0	1.1578	0.028039	0.069206	0.815761	1578	2	1.1578
TEKT3	4	0.0095574	0.032044	0.898634	653	3	-1.1361	0.028069	0.069263	0.81593	1579	1	-1.1361
IDO2	4	0.72848	0.73317	1	13774	1	1.3071	0.028138	0.06941	0.816155	1580	3	1.3071
PDHB	4	0.83676	0.83672	1	15661	0	1.2142	0.028138	0.06941	0.816155	1581	3	1.2142
CCDC69	4	0.45901	0.56227	1	10483	1	1.3507	0.028193	0.069531	0.816859	1582	3	1.3507
POLR3D	4	0.002863	0.010145	0.786568	235	2	-0.93359	0.028226	0.069598	0.816859	1583	1	-0.93359
FSCN1	4	0.12017	0.2365	0.986322	4518	2	-0.14318	0.028226	0.069598	0.816859	1584	1	-0.14318
WAPAL	3	0.0082838	0.022395	0.881798	577	1	-0.053943	0.028253	0.057565	0.763259	1585	1	-0.053943
NCAPG2	3	0.96515	0.96535	1	18123	0	0.51328	0.028253	0.057565	0.763259	1586	2	0.51328
GABRQ	4	0.80343	0.80338	1	15060	0	1.4127	0.028324	0.069815	0.817556	1587	3	1.4127
RASL12	4	0.40113	0.53453	1	9943	1	0.60929	0.028331	0.069829	0.817556	1588	2	0.60929
C20orf197	4	0.091803	0.1995	0.972476	3859	1	0.7892	0.028383	0.069942	0.817556	1589	1	0.7892
CCDC141	4	0.53617	0.60288	1	11290	1	0.62718	0.028435	0.070059	0.817556	1590	2	0.62718
ARL1	3	0.56224	0.57555	1	11579	1	-0.61478	0.028449	0.057889	0.764857	1591	2	-0.61478
LOC400863	4	0.99153	0.99156	1	18717	0	1.1616	0.028501	0.070186	0.817556	1592	3	1.1616
RPRD1B	4	0.13343	0.25123	0.986322	4812	1	0.80031	0.028521	0.070237	0.817556	1593	2	0.80031
FBXW11	4	0.99546	0.99545	1	18832	0	1.3104	0.028521	0.070237	0.817556	1594	2	1.3104
KRTAP17-1	4	0.80538	0.8053	1	15092	0	1.1826	0.028521	0.070237	0.817556	1595	2	1.1826
SLC35D2	4	0.78815	0.78804	1	14771	0	0.040935	0.02854	0.070275	0.817556	1596	1	0.040935
SLMAP	4	0.82946	0.82944	1	15541	0	-0.047969	0.02854	0.070275	0.817556	1597	1	-0.047969
C2orf73	4	0.29241	0.4267	1	8050	1	0.39883	0.02854	0.070275	0.817556	1598	1	0.39883
NBPF9	4	0.98874	0.98874	1	18659	0	0.74392	0.028548	0.0703	0.817556	1599	3	0.74392
NOTO	4	0.50757	0.58733	1	10998	1	1.1704	0.028636	0.070494	0.818173	1600	3	1.1704
SLCO3A1	4	0.4369	0.55131	1	10265	1	0.76166	0.028696	0.070641	0.818173	1601	2	0.76166
MAPK9	4	0.94178	0.94187	1	17729	0	1.3668	0.028736	0.070725	0.818173	1602	3	1.3668
NSUN3	4	0.97992	0.98001	1	18417	0	1.261	0.028755	0.07078	0.818173	1603	3	1.261
IFRD2	4	0.98931	0.9893	1	18676	0	1.2467	0.028755	0.07078	0.818173	1604	3	1.2467
SLC47A1	4	0.75118	0.75282	1	14118	1	0.33883	0.028801	0.070893	0.818173	1605	1	0.33883
RELL2	4	0.98207	0.9821	1	18499	0	1.0921	0.028816	0.070934	0.818173	1606	3	1.0921
C9orf163	4	0.55427	0.61318	1	11490	1	0.037101	0.028853	0.071015	0.818173	1607	1	0.037101
ADRM1	4	0.80219	0.80212	1	15036	0	1.1214	0.028874	0.071055	0.818173	1608	3	1.1214
SNRNP200	3	0.74409	0.74431	1	14019	0	-0.36601	0.028881	0.058583	0.769439	1609	2	-0.36601
MIEF1	4	0.47483	0.57025	1	10655	1	0.82525	0.028891	0.071092	0.818173	1610	2	0.82525
CLDN15	4	0.24117	0.37041	0.995653	7049	2	0.74701	0.028891	0.071092	0.818173	1611	2	0.74701
PRPF39	4	0.89337	0.89332	1	16819	0	1.1963	0.028926	0.071176	0.818173	1612	2	1.1963
TOMM6	4	0.96635	0.96641	1	18150	0	1.5588	0.028943	0.071213	0.818173	1613	3	1.5588
TAS2R41	4	0.91163	0.91161	1	17143	0	0.55548	0.028957	0.071249	0.818173	1614	1	0.55548
TMEM120A	4	0.93834	0.93839	1	17656	0	1.2253	0.029027	0.071405	0.818173	1615	2	1.2253
FBXO22	4	0.2841	0.41759	1	7883	2	-0.19079	0.029062	0.071478	0.818173	1616	1	-0.19079
GBF1	4	0.9725	0.97264	1	18258	0	0.6601	0.029074	0.071514	0.818173	1617	3	0.6601
MBTD1	4	0.89826	0.89819	1	16894	0	1.3912	0.029103	0.07158	0.818173	1618	3	1.3912
KRT26	4	0.54385	0.60719	1	11363	1	1.4139	0.029103	0.07158	0.818173	1619	3	1.4139
BBC3	4	0.8618	0.86169	1	16201	0	0.89914	0.029108	0.071591	0.818173	1620	2	0.89914
C2orf15	4	0.8642	0.86411	1	16247	0	1.2065	0.029108	0.071591	0.818173	1621	2	1.2065
RTP5	4	0.341	0.48012	1	8989	2	0.14254	0.029114	0.071605	0.818173	1622	1	0.14254
AKAP5	4	0.33842	0.47731	1	8942	1	1.5407	0.029198	0.071804	0.818173	1623	2	1.5407
ZNF506	4	0.93357	0.93367	1	17557	0	1.1224	0.0292	0.071807	0.818173	1624	3	1.1224
DCAF4L1	4	0.42352	0.54498	1	10134	1	1.1669	0.029221	0.071862	0.818173	1625	3	1.1669
ZBTB32	4	0.044733	0.10798	0.96183	2105	1	1.5572	0.029223	0.071865	0.818173	1626	2	1.5572
CHD1	4	0.71174	0.71941	1	13510	1	1.2008	0.029291	0.072004	0.818173	1627	3	1.2008
VWA8	4	0.93495	0.93505	1	17589	0	1.5739	0.029319	0.07207	0.818173	1628	2	1.5739
ULBP1	4	0.36711	0.50881	1	9497	1	1.215	0.02937	0.072182	0.818173	1629	2	1.215
LMOD3	4	0.98073	0.98077	1	18443	0	1.2929	0.029444	0.072351	0.818173	1630	3	1.2929
B4GALNT4	4	0.14397	0.26299	0.988221	5024	1	1.109	0.029444	0.072351	0.818173	1631	3	1.109
SLC25A19	4	0.31869	0.45559	1	8558	2	0.81908	0.029471	0.072416	0.818173	1632	2	0.81908
LRRC75B	4	0.98129	0.98131	1	18459	0	1.1213	0.029479	0.072433	0.818173	1633	3	1.1213
LAMA5	4	0.87932	0.87935	1	16559	0	1.3327	0.029501	0.072478	0.818173	1634	2	1.3327
AMY1B	4	0.18883	0.31277	0.994275	5946	1	1.4886	0.029505	0.072482	0.818173	1635	2	1.4886
AAGAB	4	0.72519	0.73049	1	13724	1	1.0217	0.029505	0.072482	0.818173	1636	2	1.0217
CBL	4	0.97983	0.97993	1	18413	0	0.46397	0.029505	0.072482	0.818173	1637	1	0.46397
RPLP1	4	0.016536	0.048582	0.925773	984	3	-1.1275	0.029505	0.072482	0.818173	1638	1	-1.1275
FAM222A	4	0.6387	0.66607	1	12477	1	-0.1026	0.029505	0.072482	0.818173	1639	1	-0.1026
TSC1	4	0.067189	0.15261	0.971423	2942	2	-0.69004	0.029505	0.072482	0.818173	1640	1	-0.69004
PRKDC	4	0.95365	0.95367	1	17929	0	1.2795	0.029505	0.072482	0.818173	1641	3	1.2795
ANO1	4	0.10923	0.22428	0.982579	4299	1	0.84686	0.029505	0.072482	0.818173	1642	2	0.84686
PCID2	4	0.29906	0.43399	1	8166	1	-0.82964	0.029505	0.072482	0.818173	1643	2	-0.82964
PNPLA2	4	0.93938	0.9395	1	17683	0	1.1863	0.029522	0.072523	0.818173	1644	3	1.1863
KRTAP4-11	4	0.28437	0.41788	1	7888	1	0.92024	0.029532	0.072554	0.818173	1645	2	0.92024
SLC16A1	4	0.96373	0.96378	1	18108	0	1.4093	0.029567	0.072621	0.818173	1646	2	1.4093
KCNN2	4	0.30524	0.44075	1	8290	2	0.71589	0.029567	0.072621	0.818173	1647	2	0.71589
HGS	4	0.018078	0.051934	0.925773	1046	1	1.3541	0.029568	0.072626	0.818173	1648	3	1.3541
MYO6	4	0.63421	0.66306	1	12421	1	1.1979	0.029603	0.072705	0.818252	1649	3	1.1979
U2SURP	2	0.97028	0.97038	1	18219	0	1.101	0.029722	0.054349	0.748883	1650	2	1.101
PRPF18	3	0.53801	0.55653	1	11314	1	0.92203	0.029725	0.059926	0.777504	1651	2	0.92203
VGLL1	4	0.36263	0.50388	1	9403	1	0.29364	0.029897	0.073363	0.821152	1652	1	0.29364
SIGLEC5	4	0.94055	0.94064	1	17711	0	1.6554	0.029938	0.073456	0.821449	1653	3	1.6554
DYDC1	4	0.90796	0.90796	1	17074	0	1.2882	0.029949	0.073476	0.821449	1654	2	1.2882
FIGLA	4	0.71172	0.71939	1	13508	1	1.5715	0.03001	0.073618	0.822556	1655	2	1.5715
DNAJC21	4	0.1241	0.24083	0.986322	4610	2	-0.0026802	0.030079	0.073767	0.82278	1656	2	-0.0026802
SH2D2A	4	0.96585	0.9659	1	18144	0	1.0871	0.030079	0.073767	0.82278	1657	3	1.0871
CENPA	3	0.81461	0.81454	1	15259	0	1.4232	0.0301	0.060501	0.778712	1658	2	1.4232
VENTX	3	0.91819	0.91829	1	17250	0	1.4232	0.0301	0.060501	0.778712	1659	2	1.4232
CPLX4	4	0.60617	0.64473	1	12097	1	1.3355	0.030102	0.073823	0.822919	1660	2	1.3355
RBM8A	3	0.98409	0.98426	1	18532	0	0.66954	0.030156	0.060597	0.778741	1661	2	0.66954
C11orf95	4	0.97127	0.97138	1	18242	0	1.5624	0.030264	0.074199	0.825498	1662	3	1.5624
PPIG	4	0.14691	0.26627	0.988221	5088	2	0.73295	0.030286	0.074242	0.825498	1663	2	0.73295
SAMD5	4	0.37982	0.52272	1	9736	1	1.2469	0.030296	0.074263	0.825498	1664	2	1.2469
DEFB107A	4	0.26643	0.39818	1	7543	1	-0.11116	0.030314	0.074303	0.825498	1665	1	-0.11116
TREM1	4	0.93136	0.93151	1	17508	0	1.4291	0.030324	0.074324	0.825498	1666	3	1.4291
PROZ	4	0.57938	0.62804	1	11771	1	1.4542	0.030347	0.074382	0.825498	1667	2	1.4542
ALG3	4	0.71406	0.72126	1	13546	1	1.3595	0.030354	0.0744	0.825498	1668	3	1.3595
MFSD4	4	0.4515	0.55845	1	10403	1	0.41015	0.030418	0.074548	0.82598	1669	1	0.41015
CENPT	4	0.046331	0.11119	0.96183	2172	1	1.2008	0.030425	0.074563	0.82598	1670	3	1.2008
DIAPH2	4	0.27048	0.40255	1	7617	1	1.5627	0.03043	0.074574	0.82598	1671	2	1.5627
METAP1	4	0.607	0.64525	1	12106	1	1.1559	0.030496	0.074714	0.826099	1672	2	1.1559
ZNF2	4	0.34168	0.48087	1	9000	1	0.89079	0.030497	0.074715	0.826099	1673	2	0.89079
KRTAP10-10	4	0.44069	0.55316	1	10296	1	0.95525	0.030512	0.074752	0.826099	1674	2	0.95525
CHAC2	4	0.90263	0.90265	1	16985	0	1.2024	0.030516	0.07476	0.826099	1675	3	1.2024
ITGB7	4	0.30894	0.4448	1	8357	2	0.86009	0.030563	0.074859	0.826099	1676	2	0.86009
TRIM74	4	0.98194	0.98197	1	18494	0	1.5311	0.030584	0.074909	0.826099	1677	2	1.5311
ANAPC16	4	0.97888	0.97902	1	18397	0	1.3528	0.030601	0.074949	0.826099	1678	3	1.3528
C7orf55	4	0.10162	0.21572	0.976073	4155	1	1.1545	0.030615	0.074982	0.826099	1679	3	1.1545
FKBP10	4	0.067917	0.15397	0.971423	2972	2	0.13043	0.030627	0.075017	0.826099	1680	2	0.13043
BSCL2	4	0.8874	0.88739	1	16699	0	-0.095736	0.030679	0.075134	0.826913	1681	1	-0.095736
TMC4	4	0.36848	0.51032	1	9517	2	0.80201	0.030697	0.075181	0.826944	1682	2	0.80201
FKBP4	4	0.64654	0.67144	1	12588	1	1.1435	0.030811	0.075408	0.8289	1683	2	1.1435
NOTUM	4	0.4937	0.58003	1	10842	1	0.51265	0.030836	0.075471	0.8289	1684	1	0.51265
EFCAB11	4	0.70638	0.71523	1	13422	1	1.1222	0.03085	0.075501	0.8289	1685	3	1.1222
STX12	4	0.58596	0.63213	1	11839	1	1.2756	0.030894	0.075599	0.8289	1686	3	1.2756
TMEM178A	4	0.00066704	0.0024299	0.617101	65	1	1.0411	0.030972	0.075795	0.8289	1687	3	1.0411
SNAP29	4	0.26919	0.40115	1	7597	2	0.55942	0.030976	0.075803	0.8289	1688	2	0.55942
EFNA5	4	0.1711	0.29318	0.99386	5588	1	0.84911	0.030976	0.075803	0.8289	1689	2	0.84911
FBXO46	4	0.024512	0.065849	0.944682	1306	2	0.21783	0.030976	0.075803	0.8289	1690	2	0.21783
LCAT	4	0.52762	0.59818	1	11201	1	1.1433	0.030976	0.075803	0.8289	1691	2	1.1433
BAGE2	4	0.20879	0.33485	0.995653	6363	2	0.60516	0.030976	0.075803	0.8289	1692	2	0.60516
OR51E2	4	0.9871	0.98706	1	18608	0	1.182	0.031033	0.075938	0.8289	1693	3	1.182
TRPM7	2	0.0011873	0.0023162	0.617101	108	1	-0.68527	0.031047	0.056658	0.7577	1694	1	-0.68527
EEFSEC	4	0.98443	0.98442	1	18543	0	0.72718	0.031058	0.075986	0.8289	1695	3	0.72718
CNGA1	4	0.033024	0.083843	0.947875	1665	2	-0.83457	0.031096	0.076077	0.8289	1696	1	-0.83457
IRF6	4	0.50315	0.58501	1	10938	1	-0.14352	0.031096	0.076077	0.8289	1697	1	-0.14352
FAM217B	4	0.17312	0.29541	0.994247	5621	2	-0.040837	0.031096	0.076077	0.8289	1698	1	-0.040837
SUCO	4	0.86331	0.86322	1	16232	0	1.0063	0.031096	0.076077	0.8289	1699	2	1.0063
SLC12A6	4	0.69786	0.70867	1	13293	1	1.1247	0.031105	0.076097	0.8289	1700	3	1.1247
NDUFS1	1	0.96887	0.96904	1	18194	0	2.1836	0.031125	0.031019	0.623941	1701	1	2.1836
SUPT16H	1	0.96887	0.96904	1	18189	0	2.1836	0.031125	0.031019	0.623941	1702	1	2.1836
CDK7	1	0.96887	0.96904	1	18188	0	2.1836	0.031125	0.031019	0.623941	1703	1	2.1836
PSMA7	1	0.96887	0.96904	1	18193	0	2.1836	0.031125	0.031019	0.623941	1704	1	2.1836
COX15	1	0.96887	0.96904	1	18190	0	2.1836	0.031125	0.031019	0.623941	1705	1	2.1836
ATP1A1	1	0.96887	0.96904	1	18191	0	2.1836	0.031125	0.031019	0.623941	1706	1	2.1836
TSR2	1	0.96887	0.96904	1	18192	0	2.1836	0.031125	0.031019	0.623941	1707	1	2.1836
RGS13	4	0.038795	0.095803	0.96183	1870	2	0.39208	0.031152	0.076205	0.829608	1708	2	0.39208
TRAT1	4	0.20968	0.33584	0.995653	6382	1	1.2635	0.031256	0.076428	0.831562	1709	3	1.2635
KRTAP6-2	4	0.68418	0.69838	1	13094	1	1.2403	0.031313	0.07654	0.832298	1710	2	1.2403
LIMK1	4	0.97788	0.97807	1	18378	0	0.91425	0.031357	0.076638	0.83271	1711	2	0.91425
EIF5B	4	0.34326	0.48257	1	9032	1	1.0456	0.031396	0.076719	0.83271	1712	3	1.0456
TMPRSS11E	4	0.091762	0.19943	0.972476	3856	2	-0.25228	0.031409	0.076752	0.83271	1713	1	-0.25228
TMEM190	4	0.50793	0.58754	1	11003	1	1.0878	0.031506	0.076959	0.833571	1714	2	1.0878
CD3EAP	4	0.033908	0.085685	0.949423	1698	1	1.2449	0.031525	0.077003	0.833571	1715	3	1.2449
TULP1	4	0.21433	0.34098	0.995653	6479	1	1.0687	0.031525	0.077003	0.833571	1716	3	1.0687
ACAD11	4	0.78049	0.78032	1	14625	1	0.89135	0.031542	0.077043	0.833571	1717	2	0.89135
EHD1	4	0.042152	0.1027	0.96183	1999	1	1.1668	0.031553	0.077065	0.833571	1718	3	1.1668
MAN1A2	4	0.93388	0.93395	1	17562	0	1.2266	0.031569	0.077094	0.833571	1719	2	1.2266
CCER1	4	0.18311	0.30644	0.994275	5832	2	0.74734	0.0316	0.077157	0.833783	1720	2	0.74734
KLHL26	4	0.99499	0.99501	1	18818	0	1.078	0.031668	0.077296	0.83438	1721	3	1.078
MSH6	4	0.1959	0.32055	0.995449	6099	2	-0.58299	0.03167	0.077299	0.83438	1722	1	-0.58299
UBR7	4	0.99421	0.99425	1	18793	0	1.1668	0.031733	0.07743	0.834683	1723	3	1.1668
DOK5	3	0.28963	0.39056	0.999865	7999	1	-0.047155	0.031744	0.06306	0.794868	1724	1	-0.047155
ARL6IP1	4	0.90837	0.90838	1	17081	0	0.16906	0.031748	0.077459	0.834683	1725	1	0.16906
HUNK	4	0.95044	0.9505	1	17882	0	1.0032	0.031748	0.077459	0.834683	1726	2	1.0032
RAB10	4	0.85974	0.8596	1	16159	0	1.089	0.031809	0.077589	0.834813	1727	2	1.089
DYNC2LI1	4	0.82042	0.82036	1	15387	0	0.2118	0.031826	0.077625	0.834813	1728	1	0.2118
CDC73	4	0.17718	0.29986	0.994247	5700	1	1.2271	0.03184	0.077657	0.834813	1729	2	1.2271
DHRS4L2	4	0.95867	0.95869	1	18000	0	1.2065	0.031857	0.07769	0.834813	1730	3	1.2065
GJC2	4	0.053839	0.12634	0.971281	2441	3	-0.93873	0.03193	0.077854	0.83611	1731	1	-0.93873
CYP2C19	4	0.24114	0.37038	0.995653	7047	2	0.7498	0.031956	0.077911	0.836247	1732	2	0.7498
HVCN1	4	0.16743	0.28906	0.991618	5518	1	1.3251	0.032004	0.078018	0.836929	1733	3	1.3251
PDE7A	4	0.16207	0.28311	0.990226	5409	1	1.0155	0.032126	0.078291	0.839384	1734	3	1.0155
SUN3	4	0.98096	0.981	1	18450	0	1.3089	0.032145	0.078341	0.839447	1735	2	1.3089
WTAP	4	0.82137	0.82133	1	15407	0	0.73953	0.032171	0.078405	0.839665	1736	2	0.73953
HYOU1	3	0.77092	0.77119	1	14455	0	0.53347	0.032214	0.063784	0.795342	1737	1	0.53347
ZFR	4	0.99491	0.99492	1	18817	0	1.0152	0.032328	0.078779	0.841609	1738	3	1.0152
HSPE1-MOB4	4	0.97604	0.97624	1	18317	0	0.70778	0.032357	0.078828	0.841609	1739	3	0.70778
PRSS57	4	0.75379	0.75522	1	14167	1	0.89928	0.032366	0.078851	0.841609	1740	2	0.89928
BRDT	4	0.99021	0.9902	1	18692	0	1.5015	0.032377	0.078876	0.841609	1741	2	1.5015
WDR5B	4	0.98565	0.98563	1	18569	0	1.5915	0.032408	0.078943	0.841609	1742	3	1.5915
MOSPD3	4	0.94668	0.94674	1	17827	0	1.165	0.032419	0.078957	0.841609	1743	3	1.165
PPFIA1	4	0.73219	0.73628	1	13828	1	0.97033	0.03243	0.078975	0.841609	1744	2	0.97033
RPUSD1	4	0.16959	0.29151	0.993193	5552	1	1.3301	0.032434	0.078986	0.841609	1745	3	1.3301
SLC9A3	4	0.41607	0.54146	1	10076	1	0.90918	0.032451	0.079028	0.841609	1746	2	0.90918
KDM1A	4	0.83665	0.83662	1	15659	0	1.0017	0.032479	0.079098	0.841891	1747	3	1.0017
RLN2	4	0.97091	0.971	1	18231	0	1.4068	0.032546	0.079253	0.842938	1748	2	1.4068
WIPI1	4	0.60234	0.64234	1	12052	1	1.3916	0.032557	0.079285	0.842938	1749	3	1.3916
ADRB1	4	0.32451	0.46189	1	8674	1	0.46024	0.032633	0.079434	0.843099	1750	2	0.46024
OTUD6B	4	0.93884	0.9389	1	17668	0	0.35629	0.032633	0.079434	0.843099	1751	1	0.35629
RGS19	4	0.95656	0.95656	1	17966	0	1.1701	0.032648	0.079471	0.843099	1752	3	1.1701
STX1A	4	0.95922	0.95924	1	18011	0	1.3471	0.032654	0.079489	0.843099	1753	3	1.3471
GPR78	4	0.85609	0.85602	1	16072	0	0.90763	0.032689	0.079565	0.843099	1754	2	0.90763
PPP1R11	4	0.0048761	0.016935	0.845624	365	2	-0.068743	0.032689	0.079565	0.843099	1755	2	-0.068743
DHX15	2	0.21294	0.25553	0.98698	6451	1	0.98797	0.032702	0.05954	0.776677	1756	1	0.98797
STK16	4	0.99505	0.99507	1	18820	0	1.4097	0.032775	0.079766	0.844172	1757	3	1.4097
C1orf137	4	0.35617	0.49672	1	9274	1	0.38839	0.032789	0.079799	0.844172	1758	1	0.38839
GABRA2	4	0.0076724	0.025987	0.882448	543	3	-1.4069	0.032789	0.079799	0.844172	1759	1	-1.4069
ASNA1	4	0.16106	0.28199	0.990226	5386	1	1.005	0.032815	0.079862	0.844368	1760	3	1.005
CCNE2	4	0.6884	0.70148	1	13153	1	0.81749	0.032922	0.080092	0.846329	1761	2	0.81749
KIF25	4	0.17813	0.30093	0.994247	5723	1	1.05	0.032994	0.080254	0.847178	1762	3	1.05
MAP3K15	4	0.31364	0.45008	1	8451	2	0.50506	0.032997	0.080261	0.847178	1763	2	0.50506
WDR26	4	0.99543	0.99543	1	18828	0	1.1198	0.03306	0.080393	0.847384	1764	3	1.1198
TEX22	4	0.53336	0.60128	1	11259	1	-0.023573	0.033076	0.080423	0.847384	1765	1	-0.023573
GLA	4	0.18152	0.30466	0.994275	5797	2	0.56583	0.033093	0.080458	0.847384	1766	2	0.56583
C18orf21	4	0.25353	0.38398	0.997035	7295	1	0.75973	0.033093	0.080458	0.847384	1767	2	0.75973
ZNF746	4	0.54435	0.60748	1	11369	1	1.3306	0.033179	0.08066	0.848781	1768	3	1.3306
UPK3BL	4	0.78803	0.78791	1	14766	0	1.2248	0.033187	0.08068	0.848781	1769	3	1.2248
RTN4IP1	2	0.9668	0.96691	1	18153	0	0.28714	0.0332	0.060435	0.778712	1770	2	0.28714
COMMD10	4	0.37542	0.51796	1	9659	2	0.21823	0.033232	0.080774	0.848838	1771	2	0.21823
RBM25	3	0.11334	0.19431	0.971734	4380	1	-0.4804	0.033252	0.065419	0.804414	1772	1	-0.4804
TESPA1	4	0.69782	0.70864	1	13292	1	1.138	0.03329	0.080916	0.849864	1773	2	1.138
TMEM116	4	0.54423	0.60741	1	11367	1	1.5178	0.033343	0.081036	0.85066	1774	2	1.5178
UBE2H	4	0.90123	0.90123	1	16954	0	0.47804	0.033388	0.08114	0.851036	1775	1	0.47804
KRT6B	4	0.93799	0.93806	1	17651	0	1.1984	0.033397	0.081162	0.851036	1776	2	1.1984
ZSWIM1	4	0.90891	0.90891	1	17093	0	0.50108	0.03344	0.081254	0.851534	1777	1	0.50108
DHX37	3	0.0074077	0.020101	0.863962	518	1	1.0116	0.033467	0.065753	0.805508	1778	2	1.0116
MZT1	4	0.92183	0.92199	1	17330	0	0.615	0.033544	0.081478	0.853117	1779	2	0.615
TMEM106B	4	0.79152	0.79144	1	14844	0	0.75992	0.033552	0.081494	0.853117	1780	2	0.75992
MFSD2B	4	0.025664	0.068291	0.944682	1355	1	0.48161	0.033596	0.081582	0.85319	1781	2	0.48161
PCDH18	4	0.98431	0.9843	1	18538	0	1.1073	0.033621	0.081635	0.85319	1782	3	1.1073
SAMD4B	4	0.34628	0.48591	1	9095	2	0.84086	0.033676	0.081746	0.853533	1783	2	0.84086
RCBTB2	4	0.92672	0.92688	1	17413	0	1.434	0.033686	0.081768	0.853533	1784	2	1.434
HCN4	4	0.66743	0.68606	1	12892	1	-0.03134	0.0337	0.081802	0.853533	1785	1	-0.03134
GMPPA	4	0.78962	0.78953	1	14810	0	0.84137	0.033752	0.081912	0.853748	1786	2	0.84137
PTF1A	4	0.88378	0.88376	1	16639	0	1.0832	0.033783	0.081976	0.853946	1787	2	1.0832
CCBL1	4	0.53707	0.60338	1	11298	1	0.35301	0.033804	0.082021	0.853946	1788	1	0.35301
PPAN-P2RY11	4	0.012405	0.039248	0.909652	807	1	0.89992	0.033856	0.082136	0.854249	1789	2	0.89992
UBR4	4	0.2269	0.35481	0.995653	6742	1	1.0196	0.033907	0.082251	0.854249	1790	2	1.0196
HIST1H2AJ	4	0.066465	0.15119	0.971423	2909	1	0.37371	0.033986	0.082439	0.854249	1791	1	0.37371
RGS6	4	0.36008	0.50104	1	9361	2	-0.1196	0.033986	0.082439	0.854249	1792	1	-0.1196
MPC2	4	0.23359	0.36214	0.995653	6881	1	0.611	0.033986	0.082439	0.854249	1793	1	0.611
SUMO1	4	0.80589	0.80584	1	15098	0	0.70609	0.033986	0.082439	0.854249	1794	2	0.70609
ZNF318	4	0.81571	0.81567	1	15286	0	0.70777	0.033998	0.082469	0.854249	1795	2	0.70777
SOX9	4	0.057307	0.13318	0.971423	2571	1	1.4484	0.034002	0.082478	0.854249	1796	3	1.4484
WIPF1	4	0.86245	0.86238	1	16215	0	1.338	0.03401	0.082497	0.854249	1797	3	1.338
IL12RB2	4	0.98707	0.98703	1	18607	0	0.99347	0.03401	0.082497	0.854249	1798	3	0.99347
SWI5	4	0.98481	0.98481	1	18552	0	0.56597	0.034116	0.08274	0.856299	1799	2	0.56597
OR4L1	4	0.71843	0.72486	1	13612	1	1.1073	0.034143	0.082804	0.856495	1800	3	1.1073
COL2A1	4	0.82771	0.8277	1	15504	0	0.62451	0.034246	0.083036	0.857024	1801	2	0.62451
CISD2	4	0.89805	0.89798	1	16889	0	0.64323	0.034246	0.083036	0.857024	1802	1	0.64323
MTDH	4	0.4769	0.57131	1	10672	1	-0.040676	0.034246	0.083036	0.857024	1803	1	-0.040676
DNAJC5B	4	0.69947	0.70992	1	13310	1	1.3092	0.034263	0.083071	0.857024	1804	2	1.3092
CST6	4	0.56134	0.6173	1	11574	1	1.1056	0.03429	0.083125	0.857024	1805	3	1.1056
STK36	4	0.88472	0.88469	1	16659	0	1.5033	0.034323	0.083202	0.857358	1806	2	1.5033
PKP4	4	0.90907	0.90908	1	17099	0	0.34261	0.034376	0.083318	0.858087	1807	1	0.34261
IFIT1	4	0.73769	0.74085	1	13916	1	1.3678	0.034464	0.083509	0.858264	1808	2	1.3678
USP20	4	0.18706	0.3108	0.994275	5909	2	-0.42122	0.03448	0.083543	0.858264	1809	1	-0.42122
C5orf64	4	0.87959	0.87962	1	16563	0	0.69121	0.03448	0.083543	0.858264	1810	1	0.69121
TSPAN31	4	0.51699	0.59238	1	11099	1	0.018058	0.03448	0.083543	0.858264	1811	1	0.018058
CAP1	4	0.99338	0.99342	1	18769	0	1.3228	0.034489	0.083565	0.858264	1812	3	1.3228
CCDC89	4	0.99391	0.99395	1	18784	0	1.2819	0.034527	0.083639	0.858264	1813	3	1.2819
KLK13	4	0.668	0.68645	1	12895	1	1.2403	0.034534	0.08365	0.858264	1814	2	1.2403
OR52N1	4	0.40887	0.53805	1	10004	1	1.0413	0.034561	0.08371	0.85842	1815	2	1.0413
UBASH3B	4	0.44358	0.55457	1	10327	1	1.0966	0.034605	0.083792	0.858572	1816	2	1.0966
UBN1	4	0.23375	0.36232	0.995653	6885	2	0.77875	0.034616	0.083815	0.858572	1817	2	0.77875
GPR75-ASB3	4	0.82986	0.82987	1	15547	0	1.1501	0.034686	0.083955	0.858945	1818	2	1.1501
SAFB	4	0.99101	0.99102	1	18705	0	1.1756	0.034721	0.084038	0.858945	1819	3	1.1756
STXBP1	4	0.99034	0.99034	1	18696	0	1.1022	0.034721	0.084038	0.858945	1820	3	1.1022
GLO1	4	0.85366	0.85357	1	16033	0	1.2771	0.034724	0.084047	0.858945	1821	2	1.2771
NUP107	3	0.23079	0.34974	0.995653	6817	1	1.269	0.034733	0.067741	0.814529	1822	2	1.269
NUP88	3	0.98062	0.98075	1	18441	0	1.269	0.034733	0.067741	0.814529	1823	2	1.269
MAT2A	3	0.0017804	0.0050374	0.704441	159	1	1.269	0.034733	0.067741	0.814529	1824	2	1.269
CDC23	3	0.97457	0.97474	1	18287	0	1.269	0.034733	0.067741	0.814529	1825	2	1.269
MICAL1	4	0.65396	0.67657	1	12679	1	1.2437	0.034739	0.084076	0.858945	1826	3	1.2437
ERVMER34-1	4	0.85705	0.85698	1	16097	0	1.2864	0.034795	0.084203	0.859778	1827	3	1.2864
SLC22A1	4	0.52372	0.59607	1	11164	1	1.0958	0.034939	0.084513	0.860831	1828	3	1.0958
GYPE	4	0.86503	0.86495	1	16261	0	1.3421	0.03498	0.084602	0.860831	1829	3	1.3421
C3orf79	4	0.93549	0.93558	1	17602	0	1.1578	0.034998	0.084643	0.860831	1830	3	1.1578
MPP1	4	0.72921	0.73377	1	13783	1	1.1507	0.035004	0.084658	0.860831	1831	3	1.1507
RPS3	2	0.96498	0.96507	1	18120	0	0.23981	0.035018	0.063576	0.795031	1832	2	0.23981
WDR53	4	0.63774	0.66542	1	12468	1	1.0031	0.035091	0.084847	0.860831	1833	3	1.0031
ZMAT2	4	0.97539	0.97556	1	18304	0	0.97293	0.035091	0.084847	0.860831	1834	3	0.97293
ULK1	4	0.96037	0.9604	1	18024	0	1.2777	0.035091	0.084847	0.860831	1835	3	1.2777
KLHDC8A	4	0.60338	0.643	1	12068	1	1.4155	0.035091	0.084847	0.860831	1836	3	1.4155
FBXO34	4	0.79666	0.79659	1	14940	0	1.1346	0.035248	0.085219	0.862924	1837	2	1.1346
FLRT3	4	0.84512	0.84499	1	15847	0	1.4373	0.035353	0.085449	0.862924	1838	3	1.4373
LOC401052	4	0.17836	0.30118	0.994247	5727	1	1.1289	0.035371	0.085492	0.862924	1839	3	1.1289
ATG101	4	0.99574	0.99572	1	18838	0	1.0648	0.035383	0.085521	0.862924	1840	3	1.0648
DDX56	3	0.87018	0.87028	1	16391	0	0.96319	0.035462	0.068913	0.814882	1841	2	0.96319
NXNL1	4	0.52762	0.59818	1	11200	1	1.06	0.035494	0.08575	0.862924	1842	3	1.06
ZSCAN16	4	0.27127	0.40346	1	7634	2	0.69923	0.035523	0.085808	0.862924	1843	2	0.69923
MOSPD2	4	0.98126	0.98128	1	18458	0	1.0845	0.035636	0.086046	0.862924	1844	3	1.0845
CCDC47	4	0.43415	0.55003	1	10239	1	1.4814	0.035655	0.086088	0.862924	1845	2	1.4814
MCM4	3	0.95101	0.95128	1	17889	0	1.6585	0.03575	0.069356	0.816155	1846	2	1.6585
NXF1	4	0.97828	0.97843	1	18386	0	1.0009	0.035782	0.086351	0.862924	1847	3	1.0009
SPAG4	4	0.83646	0.83644	1	15654	0	1.0461	0.035788	0.086366	0.862924	1848	3	1.0461
CDK5R1	4	0.80349	0.80345	1	15062	0	1.3349	0.035853	0.086504	0.862924	1849	2	1.3349
HECW1	4	0.94271	0.94281	1	17746	0	1.2786	0.035855	0.086505	0.862924	1850	3	1.2786
C19orf33	4	0.89167	0.89164	1	16790	0	1.2571	0.035897	0.086598	0.862924	1851	2	1.2571
PADI1	4	0.081004	0.17915	0.971423	3447	1	1.0698	0.035906	0.086618	0.862924	1852	3	1.0698
VPS28	4	0.11043	0.22565	0.98325	4318	1	-0.13309	0.035909	0.086627	0.862924	1853	1	-0.13309
ATXN7L2	4	0.011876	0.038057	0.909652	774	2	-1.3136	0.035909	0.086627	0.862924	1854	1	-1.3136
MRPS17	4	0.94954	0.94959	1	17860	0	0.7216	0.035909	0.086627	0.862924	1855	1	0.7216
GPS2	4	0.074499	0.16661	0.971423	3229	1	-0.06782	0.035909	0.086627	0.862924	1856	2	-0.06782
HPS4	4	0.91164	0.91162	1	17144	0	0.71844	0.035909	0.086627	0.862924	1857	1	0.71844
ACSS3	4	0.64989	0.67376	1	12627	1	0.16948	0.035909	0.086627	0.862924	1858	1	0.16948
ADGRA2	4	0.83202	0.83202	1	15582	0	0.88756	0.035909	0.086627	0.862924	1859	2	0.88756
PITRM1	4	0.3126	0.44892	1	8428	1	0.77309	0.035909	0.086627	0.862924	1860	1	0.77309
ZNF484	4	0.79616	0.79609	1	14934	0	0.07205	0.035909	0.086627	0.862924	1861	1	0.07205
NFE2L3	4	0.59617	0.63844	1	11972	1	0.28628	0.035909	0.086627	0.862924	1862	1	0.28628
RAI1	4	0.078232	0.17385	0.971423	3347	2	-0.77802	0.035909	0.086627	0.862924	1863	1	-0.77802
TBX21	4	0.76367	0.76419	1	14337	1	-0.11559	0.035909	0.086627	0.862924	1864	1	-0.11559
PCDHGA7	4	0.15654	0.27698	0.990226	5288	1	0.9592	0.035909	0.086627	0.862924	1865	2	0.9592
UBXN7	4	0.068235	0.15461	0.971423	2986	2	-0.28765	0.035909	0.086627	0.862924	1866	1	-0.28765
JAK1	4	0.83005	0.83007	1	15553	0	0.23272	0.035909	0.086627	0.862924	1867	1	0.23272
ERCC6L2	4	0.98018	0.98026	1	18422	0	1.1161	0.035916	0.086642	0.862924	1868	3	1.1161
FAM49A	4	0.72711	0.73207	1	13750	1	1.2592	0.035919	0.086654	0.862924	1869	2	1.2592
MEMO1	4	0.76293	0.76352	1	14323	1	1.0234	0.035931	0.086684	0.862924	1870	2	1.0234
KRBOX1	4	0.96592	0.96598	1	18146	0	1.4146	0.035958	0.086735	0.862924	1871	2	1.4146
COQ10B	4	0.95044	0.9505	1	17883	0	1.4898	0.036036	0.08691	0.862924	1872	2	1.4898
AHDC1	4	0.96905	0.9691	1	18199	0	1.0982	0.036062	0.086964	0.862924	1873	3	1.0982
FBXL4	4	0.99607	0.99606	1	18842	0	1.1666	0.036086	0.087029	0.862924	1874	3	1.1666
G6PC3	4	0.98179	0.98182	1	18467	0	1.2731	0.036107	0.087073	0.862924	1875	2	1.2731
FGFR1OP2	4	0.85861	0.85847	1	16135	0	1.0653	0.036141	0.087133	0.862924	1876	3	1.0653
KCTD19	4	0.12779	0.24493	0.986322	4682	2	0.47448	0.036152	0.087158	0.862924	1877	2	0.47448
GAB3	4	0.43316	0.54955	1	10227	1	1.2943	0.036172	0.087205	0.862924	1878	3	1.2943
ZNF671	4	0.43337	0.54964	1	10229	1	0.78257	0.036213	0.087303	0.862924	1879	2	0.78257
B3GALNT1	4	0.99394	0.99398	1	18785	0	1.4865	0.036324	0.087537	0.862924	1880	3	1.4865
TLK2	4	0.9679	0.96796	1	18170	0	1.3601	0.036346	0.087581	0.862924	1881	2	1.3601
KIAA1210	4	0.79735	0.79728	1	14953	0	1.3771	0.036373	0.087645	0.862924	1882	3	1.3771
TMEM30B	4	0.85268	0.85257	1	16013	0	1.157	0.036418	0.087746	0.862924	1883	2	1.157
LACTB2	4	0.51421	0.59085	1	11074	1	1.0677	0.03649	0.08792	0.862924	1884	3	1.0677
AGO2	4	0.99647	0.9965	1	18875	0	0.95777	0.03649	0.08792	0.862924	1885	3	0.95777
LOC102724862	4	0.99278	0.99281	1	18756	0	1.0251	0.036524	0.087996	0.862924	1886	3	1.0251
RPL36AL	4	0.71672	0.72347	1	13588	1	1.0988	0.036529	0.088007	0.862924	1887	2	1.0988
CDH23	4	0.79295	0.79288	1	14872	0	1.1225	0.036529	0.088007	0.862924	1888	2	1.1225
RWDD1	4	0.68896	0.70191	1	13164	1	1.2901	0.036529	0.088007	0.862924	1889	2	1.2901
MARCKS	4	0.54936	0.61033	1	11425	1	0.86761	0.036529	0.088007	0.862924	1890	2	0.86761
PPP5C	4	0.95984	0.95986	1	18017	0	1.3788	0.036624	0.088224	0.862924	1891	2	1.3788
BAG6	4	0.98313	0.98312	1	18517	0	1.289	0.03668	0.088333	0.862924	1892	2	1.289
AACS	4	0.98833	0.98834	1	18651	0	1.0764	0.036711	0.088392	0.862924	1893	3	1.0764
SLC12A5	4	0.87913	0.87914	1	16554	0	1.4194	0.036745	0.088465	0.862924	1894	3	1.4194
HSPA14	4	0.17388	0.29627	0.994247	5636	2	0.63434	0.036802	0.088594	0.862924	1895	2	0.63434
MOB2	4	0.99607	0.99607	1	18843	0	1.1482	0.036847	0.088704	0.862924	1896	3	1.1482
LYG1	4	0.46731	0.56639	1	10563	1	0.82469	0.036853	0.088715	0.862924	1897	2	0.82469
SERPINB10	4	0.77071	0.77085	1	14449	1	1.2264	0.03686	0.088725	0.862924	1898	3	1.2264
BTD	4	0.97904	0.97917	1	18401	0	1.0243	0.036872	0.088751	0.862924	1899	3	1.0243
TMEM57	4	0.95579	0.95583	1	17955	0	1.2149	0.036903	0.08882	0.862924	1900	3	1.2149
FPGS	1	0.963	0.96325	1	18077	0	2.7188	0.036997	0.036931	0.659922	1901	1	2.7188
TRIM71	4	0.40409	0.53588	1	9965	1	1.2794	0.037143	0.089336	0.862924	1902	2	1.2794
OR2M2	4	0.77255	0.77261	1	14486	1	1.0448	0.037145	0.089337	0.862924	1903	3	1.0448
CLN5	4	0.72778	0.73261	1	13761	1	1.1934	0.037151	0.089355	0.862924	1904	3	1.1934
DRC1	4	0.97337	0.97353	1	18265	0	1.0839	0.037211	0.089494	0.862924	1905	2	1.0839
MTSS1L	4	0.4612	0.56336	1	10501	1	1.2404	0.037211	0.089494	0.862924	1906	2	1.2404
ALG10B	4	0.77898	0.7788	1	14599	1	0.94102	0.037211	0.089494	0.862924	1907	2	0.94102
KIAA1586	4	0.87735	0.87732	1	16528	0	1.2215	0.037266	0.089622	0.862924	1908	3	1.2215
PAPPA	4	0.43967	0.55265	1	10286	1	0.97785	0.037312	0.089718	0.862924	1909	2	0.97785
PNP	4	0.94271	0.94281	1	17747	0	1.0798	0.037337	0.089782	0.862924	1910	3	1.0798
MRS2	4	0.98512	0.98511	1	18559	0	1.432	0.037387	0.089887	0.862924	1911	3	1.432
THBD	4	0.50093	0.58386	1	10917	1	1.401	0.037435	0.089983	0.862924	1912	2	1.401
TSSC4	4	0.084335	0.18544	0.971423	3584	3	-0.78401	0.037492	0.090105	0.862924	1913	1	-0.78401
CSHL1	4	0.25178	0.38206	0.996844	7267	2	-0.37615	0.037492	0.090105	0.862924	1914	1	-0.37615
PVALB	4	0.26145	0.39277	1	7441	1	0.80005	0.037492	0.090105	0.862924	1915	2	0.80005
ZNF563	4	0.21165	0.33797	0.995653	6427	2	0.7274	0.037503	0.090123	0.862924	1916	2	0.7274
SNAPC4	3	0.64613	0.64783	1	12580	1	1.6776	0.037531	0.072121	0.818173	1917	2	1.6776
EIF3CL	4	0.94552	0.94554	1	17806	0	0.52797	0.037556	0.090242	0.862924	1918	3	0.52797
SLC27A5	4	0.78325	0.78312	1	14688	1	1.4883	0.037606	0.090335	0.862924	1919	3	1.4883
PIGK	4	0.99681	0.99685	1	18881	0	1.2725	0.037612	0.090347	0.862924	1920	3	1.2725
TAAR8	4	0.13031	0.24776	0.986322	4727	1	0.83831	0.037615	0.090356	0.862924	1921	2	0.83831
EPM2A	4	0.27065	0.40275	1	7625	1	0.72434	0.037728	0.090592	0.862924	1922	2	0.72434
WDR5	2	0.96223	0.96234	1	18060	0	1.4981	0.037772	0.068346	0.814529	1923	2	1.4981
UQCRQ	3	0.77835	0.77851	1	14583	0	1.6622	0.037778	0.072509	0.818173	1924	2	1.6622
ADAM11	4	0.82379	0.82377	1	15439	0	0.48573	0.037803	0.090752	0.863337	1925	2	0.48573
TAX1BP1	4	0.70087	0.71097	1	13337	1	1.0733	0.037858	0.090881	0.863736	1926	2	1.0733
WDR91	4	0.94005	0.94015	1	17700	0	1.0672	0.037966	0.091104	0.864991	1927	3	1.0672
MAPKAPK2	4	0.99635	0.99637	1	18846	0	1.4883	0.037988	0.091142	0.864991	1928	3	1.4883
MORC2	4	0.91851	0.91855	1	17256	0	1.0536	0.038011	0.091195	0.864991	1929	2	1.0536
OR8B12	4	0.81391	0.81386	1	15245	0	0.76327	0.038011	0.091195	0.864991	1930	2	0.76327
TTI2	3	0.10888	0.18823	0.971423	4292	1	0.96319	0.038117	0.073061	0.818252	1931	2	0.96319
DCTN4	3	0.0039922	0.011029	0.812665	296	2	-1.757	0.038117	0.073061	0.818252	1932	1	-1.757
FARS2	3	0.72523	0.7254	1	13726	0	0.11109	0.038117	0.073061	0.818252	1933	1	0.11109
MRPS23	3	0.75593	0.75615	1	14201	0	0.96319	0.038117	0.073061	0.818252	1934	2	0.96319
PPIAL4C	3	0.9768	0.97699	1	18359	0	0.84832	0.038117	0.073061	0.818252	1935	1	0.84832
ABCF1	3	0.70034	0.70044	1	13325	0	0.64434	0.038117	0.073061	0.818252	1936	1	0.64434
XRN2	3	0.60583	0.61197	1	12091	1	-0.087514	0.038117	0.073061	0.818252	1937	1	-0.087514
USP8	3	0.96364	0.96386	1	18105	0	0.92785	0.038117	0.073061	0.818252	1938	2	0.92785
PIK3CG	3	0.16048	0.25768	0.987284	5373	1	0.71479	0.038117	0.073061	0.818252	1939	1	0.71479
ZNF22	4	0.096066	0.20737	0.975125	3990	1	1.3347	0.038294	0.091741	0.867455	1940	2	1.3347
CWC25	4	0.91355	0.91357	1	17180	0	1.4381	0.038306	0.091756	0.867455	1941	2	1.4381
ANKDD1A	4	0.13227	0.24993	0.986322	4784	1	-0.14888	0.038322	0.091773	0.867455	1942	1	-0.14888
GZMB	4	0.9423	0.94238	1	17740	0	0.80497	0.038322	0.091773	0.867455	1943	2	0.80497
EFNB2	4	0.31901	0.45592	1	8565	2	0.15743	0.038322	0.091773	0.867455	1944	1	0.15743
ZC3H10	4	0.8159	0.81585	1	15292	0	-0.37305	0.038322	0.091773	0.867455	1945	1	-0.37305
LRRC74B	4	0.8492	0.84909	1	15935	0	1.3075	0.038374	0.091848	0.867741	1946	2	1.3075
MOGAT3	4	0.2969	0.43164	1	8124	2	0.62186	0.038522	0.092061	0.868885	1947	2	0.62186
STARD7	4	0.64392	0.66962	1	12547	1	0.54143	0.038522	0.092061	0.868885	1948	2	0.54143
ATOX1	3	0.94319	0.94341	1	17757	0	1.7099	0.038525	0.073685	0.82278	1949	2	1.7099
MAF	4	0.7357	0.73916	1	13880	1	0.29307	0.038581	0.09214	0.869205	1950	1	0.29307
INTS9	3	0.70159	0.70165	1	13345	0	1.543	0.03873	0.074021	0.824646	1951	2	1.543
MYO10	4	0.86216	0.86207	1	16209	0	1.1878	0.038852	0.092529	0.871896	1952	2	1.1878
NUP155	2	0.10369	0.17434	0.971423	4200	1	0.45282	0.038886	0.070251	0.817556	1953	1	0.45282
RANGAP1	2	0.92785	0.92771	1	17435	0	1.5396	0.038886	0.070251	0.817556	1954	1	1.5396
PTPMT1	2	0.6344	0.63426	1	12424	0	1.1235	0.038886	0.070251	0.817556	1955	1	1.1235
SLC35F4	4	0.60906	0.64659	1	12130	1	-0.013338	0.038918	0.092617	0.871896	1956	1	-0.013338
ADAMTSL3	4	0.23866	0.36772	0.995653	6990	2	-0.46987	0.038918	0.092617	0.871896	1957	1	-0.46987
MAF1	4	0.11059	0.22583	0.98325	4323	2	0.41484	0.038938	0.092648	0.871896	1958	2	0.41484
SMG5	2	0.96096	0.96104	1	18034	0	1.6053	0.039043	0.070534	0.818173	1959	2	1.6053
AGR2	4	0.67402	0.69087	1	12960	1	0.39552	0.039047	0.092785	0.871896	1960	1	0.39552
PTGS1	4	0.28798	0.42187	1	7969	1	1.3096	0.039081	0.092837	0.871896	1961	2	1.3096
CIB2	4	0.084956	0.18664	0.971423	3605	1	0.81521	0.039121	0.092888	0.871896	1962	2	0.81521
PIK3C2G	4	0.87872	0.87872	1	16546	0	-0.13654	0.039151	0.092926	0.871896	1963	1	-0.13654
FAM63A	4	0.36699	0.50869	1	9495	2	-0.43674	0.039254	0.093056	0.871896	1964	1	-0.43674
WNT3	4	0.39077	0.5297	1	9848	1	0.75569	0.039259	0.093065	0.871896	1965	2	0.75569
POLE4	4	0.97991	0.98	1	18416	0	1.3916	0.039259	0.093065	0.871896	1966	2	1.3916
LGMN	4	0.74533	0.74754	1	14037	1	0.070053	0.039306	0.093129	0.871896	1967	1	0.070053
PPOX	4	0.31083	0.44694	1	8395	2	0.62232	0.039351	0.093196	0.871896	1968	2	0.62232
PRR7	4	0.86021	0.86006	1	16167	0	0.90992	0.039351	0.093196	0.871896	1969	2	0.90992
PTN	4	0.50837	0.58775	1	11009	1	0.73915	0.039358	0.093202	0.871896	1970	2	0.73915
SRI	3	0.60418	0.61058	1	12078	1	1.6844	0.039359	0.075013	0.826099	1971	2	1.6844
SIM2	4	0.19127	0.3155	0.994275	6002	1	1.236	0.039449	0.093327	0.872633	1972	2	1.236
MUC21	4	0.57324	0.62429	1	11700	1	0.9318	0.039506	0.093419	0.8727	1973	2	0.9318
PCDHA8	4	0.89834	0.89827	1	16896	0	0.65185	0.039513	0.093425	0.8727	1974	2	0.65185
CRACR2B	4	0.9396	0.93973	1	17689	0	1.2161	0.039598	0.093554	0.873479	1975	2	1.2161
KPNA6	4	0.035737	0.089496	0.959022	1758	2	-0.049399	0.039643	0.093617	0.873638	1976	2	-0.049399
CENPBD1	4	0.36146	0.50256	1	9386	2	-0.1898	0.03972	0.093729	0.874256	1977	1	-0.1898
KRTAP5-7	4	0.72245	0.7282	1	13674	1	0.84716	0.039772	0.0938	0.874492	1978	2	0.84716
KLHL20	4	0.022677	0.061939	0.937379	1240	1	0.91018	0.040005	0.094131	0.875434	1979	2	0.91018
MED23	4	0.78927	0.78919	1	14803	0	-0.22284	0.040005	0.094131	0.875434	1980	1	-0.22284
PLA2G4F	4	0.04454	0.10759	0.96183	2095	2	-0.81589	0.040005	0.094131	0.875434	1981	1	-0.81589
LYSMD1	4	0.19949	0.32451	0.995653	6162	2	-0.48368	0.040135	0.094312	0.876269	1982	1	-0.48368
HDX	4	0.95857	0.95858	1	17997	0	1.275	0.0402	0.094387	0.876536	1983	2	1.275
MIB1	4	0.49231	0.5793	1	10824	1	0.53481	0.040264	0.094468	0.876708	1984	2	0.53481
MGST2	4	0.085216	0.18714	0.971423	3618	2	0.3634	0.040362	0.094584	0.876708	1985	2	0.3634
OSBPL11	4	0.86604	0.86597	1	16312	0	0.98128	0.040362	0.094584	0.876708	1986	2	0.98128
HSD17B6	4	0.74676	0.74883	1	14055	1	0.42869	0.040393	0.094639	0.876708	1987	1	0.42869
NCAPD3	3	0.16562	0.26464	0.988221	5482	2	-0.67959	0.040397	0.076678	0.83271	1988	1	-0.67959
KCNH2	4	0.63375	0.66276	1	12412	1	1.3481	0.04049	0.09478	0.876775	1989	2	1.3481
RIC1	4	0.34742	0.48714	1	9117	1	0.67534	0.040523	0.094828	0.876787	1990	2	0.67534
SPCS3	4	0.71429	0.72147	1	13550	1	0.82599	0.040583	0.094907	0.876861	1991	2	0.82599
C7orf66	4	0.34205	0.48127	1	9009	2	0.75465	0.04063	0.094974	0.876861	1992	2	0.75465
EIF3H	4	0.30204	0.43722	1	8222	2	0.62174	0.040665	0.095013	0.876861	1993	2	0.62174
PDE10A	4	0.21544	0.34222	0.995653	6502	2	-0.51868	0.040704	0.095064	0.876861	1994	1	-0.51868
IFIT1B	4	0.17214	0.29436	0.994247	5606	1	0.85153	0.040735	0.095096	0.876861	1995	2	0.85153
CNTNAP3B	4	0.49158	0.5789	1	10818	1	0.81738	0.040807	0.09519	0.876861	1996	1	0.81738
ZSCAN22	4	0.34423	0.48365	1	9052	1	1.226	0.04084	0.095231	0.876861	1997	2	1.226
RAN	1	0.95915	0.95946	1	18010	0	2.3156	0.040847	0.040722	0.684964	1998	1	2.3156
FRMD4A	4	0.81016	0.81011	1	15176	0	0.96369	0.040851	0.095245	0.876861	1999	2	0.96369
[truncated: 17,085 more rows]

## Sheet: BCBL1_shRNA
id	num	neg|score	neg|p-value	neg|fdr	neg|rank	neg|goodsgrna	neg|lfc	pos|score	pos|p-value	pos|fdr	pos|rank	pos|goodsgrna	pos|lfc
CSGALNACT1	4	1	1	1	19104	0	1.3095	9.0897e-15	2.5913e-07	0.000171	1	4	1.3095
UXS1	4	1	1	1	19103	0	1.3216	1.2602e-14	2.5913e-07	0.000171	2	4	1.3216
SLC39A1	4	1	1	1	19102	0	1.0581	7.2555e-14	2.5913e-07	0.000171	3	4	1.0581
TNFRSF10A	4	1	1	1	19101	0	1.303	9.7238e-14	2.5913e-07	0.000171	4	4	1.303
CXCR4	4	1	1	1	19100	0	1.4739	1.1687e-13	2.5913e-07	0.000171	5	4	1.4739
SLC26A2	4	1	1	1	19099	0	1.0514	9.1813e-13	2.5913e-07	0.000171	6	4	1.0514
XYLT2	4	1	1	1	19098	0	1.3272	1.0752e-12	2.5913e-07	0.000171	7	4	1.3272
UBA5	4	1	1	1	19097	0	1.4911	2.5846e-12	2.5913e-07	0.000171	8	4	1.4911
B3GAT3	4	1	1	1	19096	0	1.36	4.1305e-12	2.5913e-07	0.000171	9	4	1.36
JAGN1	4	1	1	1	19095	0	1.1634	1.0967e-11	2.5913e-07	0.000171	10	4	1.1634
NFIB	4	1	1	1	19094	0	0.76554	1.881e-11	2.5913e-07	0.000171	11	4	0.76554
CHST15	4	1	1	1	19093	0	1.1222	1.929e-11	2.5913e-07	0.000171	12	4	1.1222
FADD	4	1	1	1	19092	0	1.5083	3.2343e-11	2.5913e-07	0.000171	13	4	1.5083
ARID1A	4	1	1	1	19091	0	0.59966	3.6057e-11	2.5913e-07	0.000171	14	4	0.59966
DDRGK1	4	1	1	1	19090	0	0.95954	8.8598e-11	2.5913e-07	0.000171	15	4	0.95954
PAPSS1	3	1	1	1	19089	0	1.3388	1.5069e-10	2.5913e-07	0.000171	16	3	1.3388
CASP8	4	0.99969	0.99969	1	19045	0	1.3963	3.7246e-10	2.5913e-07	0.000171	17	4	1.3963
TMEM208	4	1	1	1	19088	0	1.1774	3.7761e-10	2.5913e-07	0.000171	18	4	1.1774
UFSP2	4	1	1	1	19081	0	1.2999	1.0346e-09	2.5913e-07	0.000171	19	4	1.2999
UFM1	4	0.99995	0.99995	1	19063	0	1.3525	1.3123e-09	2.5913e-07	0.000171	20	4	1.3525
PTEN	4	1	1	1	19087	0	0.63162	1.3287e-09	2.5913e-07	0.000171	21	4	0.63162
FOXO1	4	1	1	1	19086	0	0.80072	1.4115e-09	2.5913e-07	0.000171	22	4	0.80072
B4GALT7	4	1	1	1	19075	0	1.2107	1.8155e-09	2.5913e-07	0.000171	23	4	1.2107
IMPAD1	4	1	1	1	19085	0	0.74972	6.9337e-09	2.5913e-07	0.000171	24	4	0.74972
UGDH	4	0.99885	0.99883	1	19004	0	1.0046	9.201e-09	2.5913e-07	0.000171	25	4	1.0046
RASA2	4	1	1	1	19084	0	0.96616	1.5668e-08	2.5913e-07	0.000171	26	4	0.96616
C1orf27	4	1	1	1	19083	0	1.1024	6.3572e-08	2.5913e-07	0.000171	27	4	1.1024
SLC35B2	4	0.9987	0.99868	1	18994	0	1.1418	8.9358e-08	2.5913e-07	0.000171	28	4	1.1418
UFC1	4	1	1	1	19082	0	1.1558	1.1142e-07	2.5913e-07	0.000171	29	4	1.1558
CHST11	4	1	1	1	19080	0	0.60473	1.6785e-07	7.774e-07	0.000479	30	4	0.60473
ALG3	4	1	1	1	19079	0	0.74685	1.8977e-07	7.774e-07	0.000479	31	4	0.74685
UFL1	4	1	1	1	19076	0	0.97368	2.3582e-07	1.2957e-06	0.000774	32	4	0.97368
PSENEN	4	1	1	1	19078	0	0.55503	3.3536e-07	1.8139e-06	0.00105	33	4	0.55503
SMARCC1	4	0.99997	0.99996	1	19066	0	0.52181	5.507e-07	2.3322e-06	0.001273	34	4	0.52181
CHSY3	4	1	1	1	19077	0	0.83563	6.2566e-07	2.3322e-06	0.001273	35	4	0.83563
KDM5C	4	1	1	1	19073	0	0.92614	2.2924e-06	7.5149e-06	0.003988	36	4	0.92614
TMED2	4	0.99959	0.99959	1	19038	0	0.64338	2.6211e-06	8.5514e-06	0.004299	37	4	0.64338
SRP72	4	0.99999	0.99999	1	19071	0	0.83957	2.6568e-06	8.5514e-06	0.004299	38	4	0.83957
SLC35A3	4	0.99831	0.9983	1	18977	0	0.68861	2.8028e-06	1.0106e-05	0.00495	39	4	0.68861
PPIA	4	0.99914	0.99914	1	19019	0	0.60125	3.4685e-06	1.2179e-05	0.005817	40	4	0.60125
MRPL12	4	1	1	1	19074	0	1.1351	3.851e-06	1.4252e-05	0.006641	41	4	1.1351
VEZF1	4	0.99771	0.99771	1	18957	0	0.33712	4.0869e-06	1.4771e-05	0.006719	42	4	0.33712
LZTR1	4	0.99999	0.99999	1	19072	0	0.65959	5.8845e-06	2.2545e-05	0.010016	43	4	0.65959
ANKMY2	4	0.99999	0.99999	1	19070	0	0.72442	9.6553e-06	3.6538e-05	0.015864	44	4	0.72442
PTGES3	4	0.98217	0.98218	1	18622	0	0.77612	1.0469e-05	4.0166e-05	0.017052	45	3	0.77612
SYNCRIP	4	0.99999	0.99998	1	19069	0	0.59688	1.4377e-05	5.6232e-05	0.023353	46	4	0.59688
BCL7A	4	0.74277	0.74793	1	14027	1	0.40613	1.532e-05	5.8305e-05	0.023699	47	3	0.40613
GNAS	4	0.9996	0.99959	1	19039	0	0.57415	1.816e-05	7.3853e-05	0.029394	48	4	0.57415
SSR1	4	0.99998	0.99998	1	19068	0	0.53822	1.9577e-05	7.7999e-05	0.03041	49	4	0.53822
SMARCD2	4	0.99993	0.99993	1	19059	0	0.51144	2.0342e-05	8.2145e-05	0.031386	50	4	0.51144
CCAR2	4	0.99997	0.99997	1	19067	0	0.55248	2.6323e-05	0.00010443	0.039119	51	4	0.55248
ATF7IP	4	0.7422	0.74745	1	14019	1	0.67407	3.1233e-05	0.00011894	0.043698	52	3	0.67407
NONO	4	0.99997	0.99996	1	19065	0	0.70005	3.468e-05	0.00013345	0.048104	53	4	0.70005
SCN4A	4	0.99996	0.99996	1	19064	0	0.44574	3.9131e-05	0.00015056	0.053264	54	4	0.44574
ZNF746	4	0.99995	0.99994	1	19062	0	0.46718	5.4508e-05	0.00021379	0.074257	55	4	0.46718
EHMT2	4	0.99994	0.99994	1	19061	0	0.74982	5.9008e-05	0.00023607	0.079123	56	4	0.74982
BIRC6	4	0.99994	0.99994	1	19060	0	0.5206	6.0113e-05	0.0002397	0.079123	57	4	0.5206
CDK5RAP3	4	0.57196	0.63255	1	11851	1	0.61372	6.0157e-05	0.00024022	0.079123	58	3	0.61372
ZBTB7A	4	0.99954	0.99954	1	19035	0	0.42991	6.4633e-05	0.00026095	0.084494	59	4	0.42991
HMGB1	4	0.99989	0.99989	1	19055	0	0.82231	8.2258e-05	0.00032936	0.104868	60	4	0.82231
SEC62	4	0.9999	0.9999	1	19058	0	0.56308	0.00010264	0.0004071	0.127036	61	4	0.56308
NFIA	4	0.9999	0.9999	1	19057	0	0.49717	0.00010496	0.00041228	0.127036	62	4	0.49717
SSR2	4	0.99922	0.99922	1	19023	0	0.70539	0.00010845	0.00042576	0.128945	63	4	0.70539
FBXO42	4	0.99989	0.99989	1	19056	0	0.61482	0.00010995	0.00043198	0.128945	64	4	0.61482
SRP68	4	0.99769	0.99769	1	18956	0	0.70292	0.00011466	0.00045063	0.132238	65	4	0.70292
DPM1	4	0.99988	0.99989	1	19054	0	0.57204	0.00011647	0.00045685	0.132238	66	4	0.57204
UMPS	4	0.99988	0.99989	1	19053	0	0.7472	0.00012229	0.00048277	0.137653	67	4	0.7472
ADRB3	4	0.9497	0.94976	1	17984	0	0.82093	0.00013156	0.0005206	0.146258	68	3	0.82093
SLC39A9	4	0.99939	0.9994	1	19028	0	0.57929	0.000139	0.00055118	0.152604	69	4	0.57929
MAP3K7	4	0.99986	0.99986	1	19052	0	0.85464	0.00014395	0.00057398	0.154686	70	4	0.85464
ZNF518A	4	0.89729	0.89723	1	16983	0	0.40568	0.00014741	0.00058538	0.154686	71	3	0.40568
EGLN1	4	0.99985	0.99986	1	19051	0	0.53874	0.00014744	0.00058538	0.154686	72	4	0.53874
TRAM1	4	0.99634	0.99636	1	18929	0	0.47531	0.00014934	0.00059108	0.154686	73	4	0.47531
GATAD2A	4	0.99982	0.99983	1	19050	0	0.48674	0.00017579	0.00068023	0.175609	74	4	0.48674
CDX4	4	0.99981	0.9998	1	19049	0	0.29328	0.00019438	0.00073309	0.186733	75	4	0.29328
IGHMBP2	4	0.9982	0.99819	1	18970	0	0.7858	0.00019689	0.00074605	0.187533	76	4	0.7858
LRRC45	4	0.99979	0.99979	1	19048	0	0.67757	0.00020978	0.00079373	0.196927	77	4	0.67757
RPL41	4	0.99963	0.99963	1	19043	0	0.59102	0.0002131	0.00080461	0.197068	78	4	0.59102
PRDX6	4	0.98385	0.98384	1	18653	0	0.89891	0.00022288	0.00084037	0.200681	79	3	0.89891
CCDC40	4	0.99978	0.99978	1	19047	0	0.48899	0.0002229	0.00084037	0.200681	80	4	0.48899
PCBP4	4	0.99976	0.99976	1	19046	0	0.49383	0.00024158	0.00090308	0.211603	81	4	0.49383
SAFB	4	0.99881	0.99879	1	19002	0	0.63988	0.00024331	0.00090826	0.211603	82	4	0.63988
COMMD9	4	0.99887	0.99886	1	19005	0	0.8856	0.00025415	0.00094921	0.218478	83	4	0.8856
DNAH7	4	0.068364	0.15534	0.980365	3000	1	0.32048	0.00028235	0.0010451	0.237683	84	2	0.32048
MSI2	4	0.99472	0.99475	1	18885	0	0.40913	0.00029535	0.0010938	0.243092	85	4	0.40913
SIRT6	4	0.94147	0.94155	1	17820	0	0.35637	0.00029562	0.0010943	0.243092	86	3	0.35637
RB1	4	0.99968	0.99968	1	19044	0	0.25473	0.0003204	0.0011835	0.259873	87	4	0.25473
C1orf68	4	0.63421	0.66996	1	12547	1	0.45672	0.00034433	0.0012659	0.274809	88	3	0.45672
TRIM69	4	0.53384	0.61175	1	11443	1	0.54285	0.0003576	0.0013089	0.280954	89	3	0.54285
KLHL9	4	0.99929	0.9993	1	19026	0	0.4191	0.00036193	0.0013275	0.281793	90	4	0.4191
C6orf136	4	0.99834	0.99832	1	18982	0	0.48414	0.00036912	0.0013617	0.283777	91	4	0.48414
N6AMT1	4	0.99909	0.99909	1	19017	0	1.561	0.00037206	0.0013732	0.283777	92	4	1.561
ADRA2B	4	0.99962	0.99962	1	19042	0	0.39643	0.00037705	0.0013861	0.283777	93	4	0.39643
NCLN	4	0.99962	0.99962	1	19041	0	0.59093	0.00038062	0.0014001	0.283777	94	4	0.59093
CX3CL1	4	0.99961	0.99961	1	19040	0	0.38115	0.00038841	0.0014229	0.283777	95	4	0.38115
TMIE	4	0.94844	0.94851	1	17956	0	0.36682	0.00038896	0.001426	0.283777	96	3	0.36682
MLH1	4	0.88292	0.8829	1	16690	0	0.60387	0.00040212	0.0014706	0.289629	97	3	0.60387
P2RY6	4	0.99958	0.99958	1	19037	0	0.4974	0.00041832	0.001533	0.298848	98	4	0.4974
CERCAM	4	0.17618	0.3042	0.996566	5765	2	0.21617	0.00042542	0.0015535	0.299554	99	2	0.21617
GTF3C4	4	0.99161	0.99165	1	18810	0	0.95416	0.00042937	0.001568	0.299554	100	4	0.95416
ZNF326	4	0.98632	0.98628	1	18709	0	0.39411	0.00044534	0.0016328	0.307562	101	2	0.39411
VRTN	4	0.99955	0.99955	1	19036	0	0.47462	0.00044766	0.0016421	0.307562	102	4	0.47462
ARID3B	4	0.52232	0.60585	1	11328	1	0.63997	0.00046845	0.0017245	0.31986	103	3	0.63997
WARS2	4	0.90281	0.90283	1	17070	0	0.86943	0.00048919	0.0017929	0.329351	104	3	0.86943
EPHA1	4	0.99253	0.99256	1	18830	0	0.50047	0.0004968	0.0018225	0.329488	105	4	0.50047
C3orf84	4	0.99408	0.99412	1	18866	0	0.64531	0.00049795	0.0018282	0.329488	106	4	0.64531
ANTXR1	4	0.37762	0.52076	1	9717	1	0.35953	0.00051353	0.0018811	0.335763	107	2	0.35953
KLHL2	4	0.78355	0.78398	1	14737	1	0.43713	0.00051774	0.0018982	0.335763	108	3	0.43713
JAK1	4	0.99946	0.99947	1	19034	0	1.2168	0.00053733	0.0019671	0.34062	109	4	1.2168
ZNF574	4	0.41702	0.55528	1	10383	1	0.40891	0.00054719	0.0020003	0.34062	110	2	0.40891
EEF1A2	4	0.92898	0.92914	1	17572	0	0.59408	0.00054898	0.0020054	0.34062	111	3	0.59408
MPDU1	4	0.99945	0.99946	1	19033	0	0.69426	0.00054967	0.0020078	0.34062	112	4	0.69426
PAQR4	4	0.99944	0.99945	1	19032	0	0.32676	0.00055783	0.0020438	0.342496	113	4	0.32676
ORAI1	4	0.99943	0.99944	1	19031	0	0.39788	0.0005713	0.0021049	0.349309	114	4	0.39788
ATP5O	4	0.99942	0.99944	1	19030	0	0.70456	0.00057618	0.002121	0.349309	115	4	0.70456
ABHD14A	4	0.13111	0.25527	0.991872	4839	1	0.25674	0.00058805	0.0021547	0.351824	116	2	0.25674
CCL21	4	0.9994	0.99941	1	19029	0	0.34992	0.0006014	0.0022003	0.356226	117	4	0.34992
FBXW11	4	0.96343	0.96346	1	18258	0	1.1492	0.00062176	0.002276	0.36538	118	3	1.1492
COX7A2L	4	0.99846	0.99844	1	18984	0	0.38022	0.00064101	0.0023382	0.372236	119	4	0.38022
NSG1	4	0.47044	0.57997	1	10828	1	0.49989	0.00067457	0.0024553	0.387652	120	3	0.49989
SPATA16	4	0.4997	0.59443	1	11097	1	0.34274	0.00068903	0.0025128	0.393483	121	3	0.34274
HNRNPU	3	0.9993	0.99931	1	19027	0	1.3432	0.00070135	0.0020148	0.34062	122	3	1.3432
CABIN1	4	0.99926	0.99927	1	19025	0	0.58901	0.00073618	0.0026859	0.41717	123	4	0.58901
WNT2B	4	0.99925	0.99925	1	19024	0	0.58595	0.00075396	0.0027435	0.422668	124	4	0.58595
ENAH	4	0.86432	0.86422	1	16331	0	0.47103	0.00076949	0.0027979	0.427604	125	3	0.47103
GSK3B	4	0.99922	0.99922	1	19022	0	0.31838	0.00078012	0.0028357	0.429947	126	4	0.31838
CARM1	4	0.99918	0.99918	1	19021	0	0.46433	0.00082215	0.0029725	0.438381	127	4	0.46433
ABHD17C	4	0.051959	0.12327	0.972335	2390	1	0.41731	0.00082677	0.0029912	0.438381	128	3	0.41731
FBXO27	4	0.53839	0.6142	1	11492	1	0.38946	0.00083041	0.0030041	0.438381	129	3	0.38946
NOC4L	4	0.94714	0.94722	1	17927	0	1.4053	0.00083585	0.0030264	0.438381	130	3	1.4053
FNDC8	4	0.5669	0.62974	1	11786	1	0.25167	0.0008359	0.0030264	0.438381	131	2	0.25167
RHOBTB3	4	0.99916	0.99916	1	19020	0	0.24353	0.0008368	0.003029	0.438381	132	4	0.24353
ITPK1	4	0.47987	0.5846	1	10915	1	1.1277	0.00088688	0.0032239	0.458321	133	3	1.1277
TBC1D16	4	0.77227	0.77347	1	14520	1	0.36385	0.00088984	0.0032322	0.458321	134	3	0.36385
PKP3	4	0.94705	0.94713	1	17926	0	0.61217	0.00089417	0.0032425	0.458321	135	3	0.61217
SETDB1	4	0.9991	0.9991	1	19018	0	0.576	0.00090224	0.0032628	0.458321	136	4	0.576
TLDC1	4	0.99908	0.99908	1	19016	0	0.30036	0.00091545	0.0033084	0.461336	137	4	0.30036
NCR1	4	0.54355	0.61694	1	11537	1	0.38325	0.00092224	0.0033369	0.461939	138	2	0.38325
ANKRD40	4	0.91285	0.91284	1	17258	0	0.39475	0.00093768	0.0033944	0.464604	139	2	0.39475
PTPRS	4	0.99906	0.99906	1	19015	0	0.55482	0.00094229	0.0034048	0.464604	140	4	0.55482
MAPK12	4	0.99905	0.99905	1	19014	0	0.42029	0.00094881	0.0034302	0.464614	141	4	0.42029
RECQL	4	0.49427	0.59168	1	11043	1	0.39814	0.0009552	0.0034535	0.464614	142	2	0.39814
DIABLO	4	0.99903	0.99903	1	19013	0	0.21216	0.00096511	0.0034903	0.466281	143	4	0.21216
FANCI	4	0.99903	0.99903	1	19012	0	0.74045	0.00097319	0.0035172	0.466619	144	4	0.74045
ZFR	4	0.999	0.99899	1	19011	0	0.47985	0.0010043	0.0036287	0.476639	145	4	0.47985
POLR3D	4	0.99899	0.99899	1	19010	0	0.70987	0.0010093	0.0036463	0.476639	146	4	0.70987
TBC1D3H	4	0.98401	0.984	1	18656	0	0.99134	0.001023	0.0036924	0.476639	147	3	0.99134
ZNF701	4	0.41863	0.55597	1	10396	1	0.34183	0.0010335	0.0037365	0.476639	148	3	0.34183
CISH	4	0.33843	0.47866	1	8959	1	0.3606	0.001035	0.0037432	0.476639	149	2	0.3606
SLC25A25	4	0.99396	0.994	1	18864	0	0.56304	0.0010372	0.0037489	0.476639	150	4	0.56304
CTBP1	4	0.99896	0.99895	1	19009	0	0.85276	0.0010437	0.0037764	0.476639	151	4	0.85276
TPI1	4	0.35152	0.49272	1	9222	1	1.4257	0.0010521	0.0038126	0.476639	152	3	1.4257
MPV17	4	0.99895	0.99894	1	19008	0	0.45881	0.0010535	0.0038173	0.476639	153	4	0.45881
RPS6KB1	4	0.99893	0.99892	1	19007	0	0.45527	0.0010695	0.0038759	0.480198	154	4	0.45527
BTNL10	4	0.18257	0.31104	0.996566	5908	1	0.56823	0.0010748	0.0038961	0.480198	155	3	0.56823
FYTTD1	4	0.47057	0.58004	1	10830	1	0.32835	0.0010875	0.0039432	0.482895	156	3	0.32835
EDF1	4	0.99889	0.99887	1	19006	0	0.42897	0.0011124	0.0040324	0.487421	157	4	0.42897
CLK3	4	0.98817	0.98817	1	18752	0	0.29246	0.0011179	0.00405	0.487421	158	3	0.29246
GNAL	4	0.19853	0.32824	0.997	6218	1	0.33117	0.0011201	0.0040567	0.487421	159	2	0.33117
DEXI	4	0.88949	0.88945	1	16824	0	0.60197	0.0011368	0.0041086	0.490563	160	3	0.60197
CHPF2	4	0.99703	0.99705	1	18944	0	0.32861	0.0011428	0.0041345	0.490591	161	4	0.32861
TPSAB1	4	0.99883	0.99881	1	19003	0	0.3402	0.0011689	0.0042257	0.495262	162	4	0.3402
ADK	4	0.99881	0.99879	1	19001	0	0.36245	0.0011947	0.0043112	0.500865	163	4	0.36245
S100A1	4	0.94099	0.94107	1	17807	0	0.85474	0.0011991	0.0043306	0.500865	164	3	0.85474
VKORC1L1	4	0.9988	0.99878	1	19000	0	0.34706	0.0012048	0.0043522	0.500865	165	4	0.34706
SOWAHB	4	0.99878	0.99876	1	18999	0	0.20502	0.0012195	0.0043988	0.50265	166	4	0.20502
MGA	4	0.99876	0.99875	1	18998	0	1.4507	0.0012381	0.0044677	0.50265	167	4	1.4507
TNFRSF12A	4	0.99876	0.99874	1	18997	0	0.43701	0.0012385	0.0044693	0.50265	168	4	0.43701
NAA60	4	0.48042	0.58487	1	10923	1	0.42571	0.0012398	0.0044729	0.50265	169	3	0.42571
NLRP14	4	0.79241	0.79247	1	14901	1	0.33582	0.0012527	0.0045113	0.503483	170	2	0.33582
UQCRC1	4	0.97241	0.97256	1	18434	0	0.71065	0.0012587	0.004533	0.503483	171	3	0.71065
SDK1	4	0.99872	0.99871	1	18996	0	0.37735	0.001276	0.0045926	0.507154	172	4	0.37735
CDK14	4	0.95762	0.95765	1	18149	0	0.40799	0.0012999	0.0046719	0.510071	173	3	0.40799
TIAM2	4	0.9987	0.99868	1	18995	0	0.42744	0.0013003	0.0046724	0.510071	174	4	0.42744
MAEA	4	0.99867	0.99863	1	18993	0	0.392	0.0013319	0.0047787	0.515886	175	4	0.392
ARID1B	4	0.0052715	0.018229	0.866756	397	1	0.24771	0.0013325	0.0047797	0.515886	176	3	0.24771
OR2T29	4	0.39994	0.54462	1	10188	2	0.29335	0.0013459	0.0048233	0.51766	177	2	0.29335
PCDHA4	4	0.99862	0.99859	1	18992	0	0.29653	0.0013798	0.004944	0.5261	178	4	0.29653
UBA6	4	0.99862	0.99858	1	18991	0	0.44692	0.0013836	0.004957	0.5261	179	4	0.44692
CHRNA10	4	0.77901	0.7796	1	14651	1	0.42192	0.001422	0.0050902	0.534409	180	3	0.42192
FRY	4	0.99858	0.99854	1	18990	0	0.28191	0.0014228	0.0050912	0.534409	181	4	0.28191
EIF2AK4	4	0.99855	0.99852	1	18989	0	0.44793	0.0014519	0.0051881	0.536199	182	4	0.44793
ULK2	4	0.99853	0.9985	1	18988	0	0.34284	0.0014696	0.0052482	0.536199	183	4	0.34284
WFIKKN1	4	0.99853	0.9985	1	18987	0	0.37185	0.00147	0.0052503	0.536199	184	4	0.37185
CNOT4	4	0.99852	0.99849	1	18986	0	0.55719	0.0014737	0.0052633	0.536199	185	4	0.55719
PSTPIP1	4	0.13394	0.25835	0.991872	4909	1	0.28899	0.0014761	0.005271	0.536199	186	2	0.28899
SPOPL	4	0.99851	0.99848	1	18985	0	0.3851	0.0014858	0.0053021	0.536199	187	4	0.3851
PPY	4	0.95826	0.95829	1	18160	0	0.3978	0.001487	0.0053047	0.536199	188	3	0.3978
TPRA1	4	0.98079	0.98084	1	18597	0	0.41861	0.0014956	0.0053338	0.536295	189	3	0.41861
B4GALT3	4	0.56575	0.6291	1	11770	1	0.86759	0.0015442	0.0055115	0.546519	190	3	0.86759
SRP14	4	0.25808	0.39235	1	7427	2	-0.18817	0.0015495	0.0055328	0.546519	191	1	-0.18817
POLR1E	4	0.39853	0.54313	1	10157	1	1.1611	0.0015551	0.0055499	0.546519	192	3	1.1611
TMEM55A	4	0.99842	0.9984	1	18983	0	0.42509	0.001584	0.005653	0.553821	193	4	0.42509
MYO1D	4	0.47305	0.58126	1	10858	1	0.45759	0.0016085	0.0057473	0.55471	194	3	0.45759
LAMC2	4	0.60098	0.64955	1	12179	1	0.4587	0.0016555	0.0059075	0.55471	195	3	0.4587
UROC1	4	0.99834	0.99832	1	18981	0	0.47671	0.0016605	0.0059251	0.55471	196	4	0.47671
SUPT7L	4	0.99163	0.99166	1	18813	0	0.40056	0.0016657	0.005943	0.55471	197	4	0.40056
MANBAL	4	0.76825	0.76987	1	14447	1	0.60074	0.0016704	0.0059583	0.55471	198	3	0.60074
B4GALT2	4	0.98339	0.98339	1	18645	0	0.48393	0.001673	0.0059655	0.55471	199	3	0.48393
TMEM183B	4	0.99832	0.99831	1	18980	0	0.329	0.0016757	0.0059774	0.55471	200	4	0.329
LRRC27	4	0.99832	0.99831	1	18979	0	0.26102	0.0016766	0.0059842	0.55471	201	4	0.26102
ISLR	4	0.99831	0.9983	1	18978	0	0.48444	0.0016862	0.0060148	0.55471	202	4	0.48444
USP7	4	0.52392	0.60669	1	11345	1	0.91361	0.0016899	0.0060272	0.55471	203	3	0.91361
NT5C3B	4	0.9983	0.99829	1	18976	0	0.37105	0.0016993	0.006063	0.55471	204	4	0.37105
TBC1D30	4	0.9983	0.99829	1	18975	0	0.52562	0.0017024	0.0060723	0.55471	205	4	0.52562
OR2T8	4	0.77156	0.77283	1	14507	1	0.29039	0.0017096	0.0060956	0.55471	206	3	0.29039
FKBP8	4	0.90205	0.90207	1	17058	0	0.34233	0.0017174	0.0061215	0.55471	207	3	0.34233
KLHL42	4	0.87583	0.87581	1	16544	0	0.41725	0.0017201	0.0061309	0.55471	208	3	0.41725
SLA2	4	0.99828	0.99827	1	18974	0	0.25124	0.0017214	0.0061376	0.55471	209	4	0.25124
WWP2	4	0.85993	0.85977	1	16242	0	0.60688	0.0017416	0.0062091	0.55471	210	3	0.60688
UBE2J2	4	0.99826	0.99825	1	18973	0	0.76329	0.0017419	0.0062101	0.55471	211	4	0.76329
MC3R	4	0.99826	0.99825	1	18972	0	0.31743	0.0017428	0.0062138	0.55471	212	4	0.31743
LAMB2	4	0.26467	0.39949	1	7558	1	0.47783	0.0017582	0.0062672	0.556873	213	3	0.47783
ADAMTSL1	4	0.99823	0.99822	1	18971	0	0.42884	0.0017708	0.0063128	0.558329	214	4	0.42884
PTPN18	4	0.76775	0.76944	1	14440	1	0.36701	0.0018166	0.0064522	0.568029	215	3	0.36701
GANAB	4	0.99816	0.99815	1	18969	0	0.4437	0.0018431	0.0065636	0.57402	216	4	0.4437
TRIM24	4	0.99326	0.99329	1	18849	0	0.40133	0.001858	0.0066191	0.57402	217	4	0.40133
SAP30L	4	0.89279	0.8927	1	16900	0	0.20578	0.0018645	0.0066372	0.57402	218	2	0.20578
ECHS1	4	0.99813	0.99812	1	18968	0	0.23189	0.0018742	0.0066719	0.57402	219	4	0.23189
SP8	4	0.99812	0.99811	1	18967	0	0.2531	0.0018836	0.0067035	0.57402	220	4	0.2531
FLG	4	0.83063	0.83068	1	15662	0	0.27302	0.001891	0.0067398	0.57402	221	2	0.27302
PYCR2	4	0.89982	0.8998	1	17026	0	0.30421	0.0018945	0.0067548	0.57402	222	3	0.30421
PECAM1	4	0.9981	0.99809	1	18966	0	0.29195	0.0019046	0.0067911	0.57402	223	4	0.29195
MEF2B	4	0.73097	0.73838	1	13832	1	0.45786	0.0019157	0.0068315	0.57402	224	3	0.45786
SAR1A	4	0.99385	0.99389	1	18861	0	0.27327	0.0019185	0.0068383	0.57402	225	4	0.27327
PATL2	4	0.99808	0.99808	1	18965	0	0.35657	0.0019215	0.0068533	0.57402	226	4	0.35657
OR4N4	4	0.85183	0.85169	1	16068	0	0.42615	0.0019294	0.0068808	0.57402	227	3	0.42615
CCNA2	3	0.99806	0.99811	1	18964	0	0.84106	0.0019405	0.0054784	0.546519	228	3	0.84106
DCT	4	0.74744	0.75183	1	14100	1	0.3645	0.0019511	0.0069528	0.577508	229	3	0.3645
DPY19L3	4	0.6582	0.68559	1	12831	1	0.43171	0.0019633	0.0069912	0.578179	230	3	0.43171
DOK3	4	0.20685	0.33729	0.997	6389	2	0.21031	0.0019766	0.0070404	0.579187	231	2	0.21031
WDR20	4	0.99164	0.99168	1	18814	0	0.44056	0.0019822	0.0070653	0.579187	232	4	0.44056
ZMYND8	4	0.99801	0.998	1	18963	0	0.4335	0.0019904	0.0070943	0.579187	233	4	0.4335
ENTPD1	4	0.30111	0.43846	1	8209	2	0.27324	0.001999	0.0071264	0.579334	234	2	0.27324
SLC45A3	4	0.99797	0.99797	1	18962	0	0.30477	0.0020288	0.0072374	0.585858	235	4	0.30477
PRKCE	4	0.98785	0.98785	1	18742	0	0.40419	0.0020578	0.0073483	0.592326	236	3	0.40419
NUP62CL	4	0.86854	0.86845	1	16397	0	0.24317	0.0020669	0.0073825	0.592583	237	2	0.24317
GPBAR1	4	0.96861	0.96868	1	18364	0	0.56849	0.002088	0.0074581	0.596151	238	3	0.56849
WDR31	4	0.74991	0.75392	1	14130	1	0.21273	0.0021186	0.0075701	0.601845	239	2	0.21273
COA4	4	0.94193	0.94203	1	17828	0	0.88219	0.0021245	0.0075924	0.601845	240	3	0.88219
ZNHIT2	2	0.91883	0.91868	1	17370	0	1.8769	0.0021405	0.0041987	0.495141	241	2	1.8769
GFRA4	4	0.3902	0.53414	1	9969	1	0.4897	0.0021943	0.0078505	0.619732	242	3	0.4897
PMFBP1	4	0.32739	0.4667	1	8745	2	0.16695	0.0022267	0.0079691	0.621658	243	2	0.16695
TMEM214	4	0.99776	0.99777	1	18961	0	0.33286	0.0022368	0.0080111	0.621658	244	4	0.33286
LUC7L2	4	0.99776	0.99777	1	18960	0	0.47131	0.0022379	0.0080142	0.621658	245	4	0.47131
HAVCR1	4	0.062068	0.14309	0.972813	2785	1	0.24774	0.0022445	0.0080376	0.621658	246	2	0.24774
ARPIN	4	0.99774	0.99774	1	18959	0	0.22369	0.0022645	0.0081096	0.624701	247	4	0.22369
CD247	4	0.99772	0.99772	1	18958	0	0.37703	0.0022837	0.0081723	0.625168	248	4	0.37703
SFRP5	4	0.10068	0.21566	0.989653	4112	2	0.21848	0.0022863	0.0081811	0.625168	249	2	0.21848
RRAS	4	0.99767	0.99767	1	18955	0	0.31835	0.0023335	0.0083485	0.635419	250	4	0.31835
C6orf99	4	0.99686	0.9969	1	18938	0	0.38078	0.0023612	0.00844	0.639832	251	4	0.38078
DCP2	4	0.9976	0.9976	1	18954	0	0.41758	0.0023972	0.0085672	0.645338	252	4	0.41758
ILK	4	0.92905	0.9292	1	17577	0	0.48969	0.0024017	0.0085802	0.645338	253	3	0.48969
TSPAN3	4	0.99758	0.99757	1	18953	0	0.28966	0.0024189	0.0086387	0.647195	254	4	0.28966
PLEKHA4	4	0.60466	0.65175	1	12218	1	0.56573	0.0024384	0.0087092	0.647398	255	3	0.56573
MAST1	4	0.97826	0.97842	1	18557	0	0.56443	0.0024726	0.0088222	0.647551	256	3	0.56443
LRRC10	4	0.58084	0.63766	1	11954	1	0.62312	0.0024758	0.008831	0.647551	257	3	0.62312
CCNY	4	0.99405	0.9941	1	18865	0	0.49341	0.0024851	0.0088678	0.647551	258	4	0.49341
AURKC	4	0.88323	0.8832	1	16695	0	0.30267	0.0024882	0.0088792	0.647551	259	2	0.30267
MFSD3	4	0.98658	0.98652	1	18714	0	0.84231	0.0024885	0.0088808	0.647551	260	3	0.84231
CYP1A2	4	0.97876	0.9789	1	18564	0	0.39535	0.0025164	0.0089621	0.651	261	3	0.39535
BCOR	4	0.99702	0.99705	1	18943	0	0.64729	0.0025415	0.0090482	0.654759	262	4	0.64729
TCOF1	4	0.1917	0.32097	0.997	6092	1	0.337	0.0025796	0.0091606	0.660396	263	2	0.337
PIK3R4	4	0.034053	0.087025	0.959024	1723	2	0.1401	0.0026019	0.0092508	0.66439	264	2	0.1401
TKT	4	0.99738	0.99738	1	18952	0	0.70284	0.0026198	0.0093146	0.666463	265	4	0.70284
GID8	4	0.76588	0.76772	1	14408	1	0.55903	0.0026412	0.0093845	0.666806	266	3	0.55903
LPGAT1	4	0.60727	0.6533	1	12255	1	0.059036	0.0026515	0.0094115	0.666806	267	2	0.059036
MTR	4	0.99734	0.99734	1	18951	0	0.29374	0.0026595	0.0094353	0.666806	268	4	0.29374
OR2Z1	4	0.99733	0.99733	1	18950	0	0.25947	0.0026688	0.0094592	0.666806	269	4	0.25947
MOB3A	4	0.95342	0.95347	1	18061	0	0.32534	0.002679	0.0094939	0.666806	270	3	0.32534
MON2	4	0.96944	0.9695	1	18381	0	0.53185	0.002705	0.0095804	0.67042	271	3	0.53185
CDKN1A	4	0.83683	0.83679	1	15784	0	0.27626	0.0027189	0.0096349	0.671768	272	3	0.27626
P2RY2	4	0.94198	0.94208	1	17829	0	0.52675	0.0027405	0.009709	0.672209	273	3	0.52675
UQCC2	4	0.99726	0.99725	1	18949	0	0.416	0.0027414	0.0097116	0.672209	274	4	0.416
PPP2R4	4	0.99724	0.99724	1	18948	0	0.82622	0.0027635	0.0097903	0.674527	275	4	0.82622
MAPK9	4	0.9969	0.99693	1	18940	0	0.45019	0.0027762	0.0098391	0.674527	276	4	0.45019
TYMS	4	0.99722	0.99722	1	18947	0	0.30964	0.0027791	0.009851	0.674527	277	4	0.30964
MTG1	3	0.99713	0.99717	1	18946	0	1.4452	0.0028734	0.0080008	0.621658	278	3	1.4452
LYRM9	4	0.99067	0.99067	1	18794	0	0.37742	0.0029407	0.010422	0.71105	279	4	0.37742
GPSM1	4	0.99703	0.99706	1	18945	0	0.2163	0.0029682	0.010508	0.714404	280	4	0.2163
FAM118B	4	0.65556	0.68384	1	12800	1	0.44593	0.0029984	0.010613	0.714613	281	3	0.44593
ASPN	4	0.93164	0.93176	1	17629	0	0.44003	0.0030159	0.010671	0.714613	282	3	0.44003
ASB16	4	0.99698	0.997	1	18942	0	0.34016	0.003024	0.010701	0.714613	283	4	0.34016
DPM3	4	0.46579	0.57773	1	10787	1	0.79609	0.0030362	0.010732	0.714613	284	3	0.79609
TCEANC	4	0.37267	0.51545	1	9628	1	0.39953	0.0030371	0.010736	0.714613	285	3	0.39953
UQCC1	4	0.95262	0.95269	1	18046	0	0.86275	0.0030672	0.010833	0.718561	286	3	0.86275
TGFBR2	4	0.99691	0.99694	1	18941	0	0.40122	0.003091	0.010918	0.721693	287	4	0.40122
ZNF316	4	0.99688	0.99691	1	18939	0	0.3405	0.0031218	0.011028	0.726511	288	4	0.3405
ZNF205	4	0.99685	0.99688	1	18937	0	0.32738	0.0031549	0.011155	0.73235	289	4	0.32738
NANOS2	4	0.99682	0.99686	1	18936	0	0.24314	0.003178	0.011243	0.734812	290	4	0.24314
KIRREL2	4	0.75882	0.76156	1	14291	1	0.27942	0.0031858	0.011272	0.734812	291	2	0.27942
COX7B2	4	0.76147	0.76386	1	14338	1	0.32841	0.0031971	0.011308	0.734812	292	3	0.32841
UTP23	4	0.85029	0.85018	1	16039	0	1.0239	0.0032346	0.011423	0.739738	293	3	1.0239
AGFG2	4	0.56103	0.62652	1	11715	1	0.40405	0.0032686	0.011558	0.745017	294	3	0.40405
AKIP1	4	0.43971	0.56548	1	10572	1	0.50638	0.0032958	0.011642	0.745017	295	3	0.50638
ZFP30	4	0.91604	0.9161	1	17322	0	0.43018	0.003303	0.011665	0.745017	296	3	0.43018
MROH7	4	0.74432	0.74923	1	14055	1	0.31392	0.0033137	0.011699	0.745017	297	2	0.31392
OR2A1	4	0.97266	0.97281	1	18442	0	0.46089	0.0033252	0.011737	0.745017	298	3	0.46089
KLHDC10	4	0.99666	0.9967	1	18935	0	0.23411	0.0033357	0.011773	0.745017	299	4	0.23411
IGF2	4	0.99666	0.9967	1	18934	0	0.36504	0.0033371	0.011777	0.745017	300	4	0.36504
HNRNPLL	4	0.99665	0.99669	1	18933	0	0.27479	0.0033525	0.01183	0.74517	301	4	0.27479
HECTD1	4	0.99662	0.99665	1	18932	0	0.3355	0.0033826	0.011926	0.74517	302	4	0.3355
C16orf78	4	0.45167	0.57105	1	10666	1	0.093746	0.0033856	0.011933	0.74517	303	1	0.093746
POLR3F	4	0.72525	0.73392	1	13743	1	0.96662	0.0033878	0.011941	0.74517	304	3	0.96662
GABRQ	4	0.23171	0.36402	0.997246	6927	1	0.34157	0.0033967	0.011975	0.74517	305	3	0.34157
TXNDC5	4	0.85544	0.85533	1	16155	0	0.3432	0.003408	0.012017	0.745355	306	3	0.3432
EHMT1	4	0.99007	0.99005	1	18781	0	0.45208	0.0034514	0.012162	0.750767	307	3	0.45208
NCF4	4	0.94527	0.94528	1	17898	0	0.50354	0.0034566	0.012183	0.750767	308	3	0.50354
ZNF296	4	0.99527	0.99527	1	18899	0	0.43123	0.0035112	0.012375	0.756734	309	4	0.43123
SOHLH2	4	0.98779	0.98779	1	18741	0	0.36094	0.0035263	0.012423	0.756734	310	3	0.36094
ZNF645	4	0.47113	0.58031	1	10836	1	0.089532	0.0035429	0.012473	0.756734	311	2	0.089532
LOXL4	4	0.92488	0.92503	1	17494	0	0.2863	0.0035434	0.012478	0.756734	312	2	0.2863
NKAIN1	4	0.99642	0.99644	1	18931	0	0.30076	0.0035845	0.012613	0.759216	313	4	0.30076
KMT2B	4	0.99641	0.99643	1	18930	0	0.46348	0.0035922	0.012633	0.759216	314	4	0.46348
FXYD2	4	0.18446	0.31311	0.996831	5950	1	0.36622	0.0035941	0.012638	0.759216	315	3	0.36622
MBD3	4	0.51138	0.6002	1	11212	1	0.61729	0.0036081	0.012693	0.760157	316	3	0.61729
FAM102A	4	0.75349	0.75705	1	14202	1	0.36925	0.0036333	0.012784	0.760817	317	3	0.36925
TMCO3	4	0.90039	0.90037	1	17036	0	0.39615	0.0036445	0.012822	0.760817	318	3	0.39615
HHEX	4	0.90721	0.90723	1	17160	0	0.23151	0.0036477	0.012834	0.760817	319	3	0.23151
PSPC1	4	0.69599	0.71183	1	13306	1	0.40466	0.0036781	0.012933	0.760817	320	3	0.40466
PKLR	4	0.99632	0.99634	1	18928	0	0.46367	0.0036817	0.012942	0.760817	321	4	0.46367
USE1	4	0.96237	0.9624	1	18241	0	0.38831	0.0036969	0.012999	0.760817	322	2	0.38831
ZNF592	4	0.95798	0.95802	1	18154	0	0.39184	0.003701	0.013014	0.760817	323	3	0.39184
RBMY1B	4	0.9963	0.99631	1	18927	0	0.33676	0.0037046	0.013023	0.760817	324	4	0.33676
MORF4L1	4	0.99628	0.9963	1	18926	0	0.29299	0.0037196	0.013077	0.761398	325	4	0.29299
GALNT13	4	0.99627	0.99628	1	18925	0	0.19295	0.0037315	0.013112	0.761398	326	4	0.19295
PLP2	4	0.86738	0.86727	1	16366	0	0.29621	0.0037525	0.013186	0.763321	327	3	0.29621
CCPG1	4	0.99622	0.99624	1	18924	0	0.32936	0.0037761	0.013266	0.764753	328	4	0.32936
NDRG2	4	0.96781	0.96788	1	18344	0	0.37334	0.0037998	0.013338	0.764753	329	3	0.37334
CRYGN	4	0.99618	0.99619	1	18923	0	0.36737	0.0038211	0.013403	0.764753	330	4	0.36737
RPS4Y1	4	0.63483	0.67034	1	12558	1	0.36575	0.0038665	0.013546	0.764753	331	3	0.36575
METTL1	4	0.99378	0.99382	1	18857	0	0.72703	0.0039078	0.013681	0.764753	332	4	0.72703
TRUB2	4	0.75344	0.757	1	14200	1	0.88061	0.0039117	0.013691	0.764753	333	2	0.88061
CXCR3	4	0.99609	0.99608	1	18922	0	0.3162	0.0039132	0.013697	0.764753	334	4	0.3162
CHP2	4	0.99606	0.99606	1	18921	0	0.40997	0.0039371	0.013779	0.764753	335	4	0.40997
GIPC2	4	0.99606	0.99605	1	18920	0	0.253	0.0039421	0.013794	0.764753	336	4	0.253
CNN1	4	0.91202	0.91201	1	17244	0	0.38298	0.0039541	0.013831	0.764753	337	3	0.38298
MED13	4	0.041362	0.10199	0.97065	1976	1	1.2758	0.0039545	0.013833	0.764753	338	3	1.2758
PLG	4	0.0038049	0.01335	0.860916	292	1	0.41125	0.0039592	0.01385	0.764753	339	3	0.41125
CA12	4	0.17604	0.30406	0.996566	5759	2	-0.060818	0.0039621	0.013862	0.764753	340	1	-0.060818
TRMU	4	0.99604	0.99603	1	18919	0	0.57106	0.0039636	0.013868	0.764753	341	4	0.57106
EDNRB	4	0.99603	0.99603	1	18918	0	0.35335	0.0039661	0.013879	0.764753	342	4	0.35335
SEC22C	4	0.99603	0.99603	1	18917	0	0.20699	0.003967	0.013882	0.764753	343	4	0.20699
PCNXL4	4	0.70663	0.7196	1	13460	1	0.14497	0.0039937	0.013981	0.764753	344	2	0.14497
NKX2-1	4	0.996	0.99599	1	18916	0	0.68832	0.003997	0.013994	0.764753	345	4	0.68832
TADA3	4	0.53167	0.61063	1	11420	1	0.62992	0.0040009	0.014006	0.764753	346	3	0.62992
SRP9	4	0.99599	0.99598	1	18915	0	0.63415	0.0040128	0.014053	0.764753	347	4	0.63415
SLC35A1	4	0.99598	0.99597	1	18914	0	0.43841	0.0040187	0.014074	0.764753	348	4	0.43841
SUPT20H	4	0.77923	0.77981	1	14656	1	0.44219	0.0040233	0.014091	0.764753	349	3	0.44219
ALDH16A1	4	0.77877	0.77937	1	14647	1	0.52085	0.0040449	0.014158	0.765802	350	3	0.52085
CHST8	4	0.99595	0.99594	1	18913	0	0.21479	0.0040532	0.01419	0.765802	351	4	0.21479
SYT3	4	0.99593	0.99592	1	18912	0	0.56086	0.004071	0.014249	0.766367	352	4	0.56086
SMARCB1	4	0.74868	0.75288	1	14113	1	0.29571	0.0040805	0.014281	0.766367	353	3	0.29571
GLCCI1	4	0.12611	0.24984	0.991872	4747	2	0.16301	0.0041044	0.014363	0.767136	354	2	0.16301
MAPKAPK5	4	0.99587	0.99586	1	18911	0	0.46524	0.0041315	0.014454	0.767136	355	4	0.46524
SLC25A33	4	0.97217	0.97231	1	18430	0	0.27306	0.0041428	0.014496	0.767136	356	3	0.27306
ADGRE2	4	0.99585	0.99584	1	18910	0	0.24251	0.0041512	0.014517	0.767136	357	4	0.24251
SIAH2	4	0.99584	0.99583	1	18909	0	0.43416	0.0041555	0.014528	0.767136	358	4	0.43416
HCST	4	0.99583	0.99582	1	18908	0	0.39866	0.0041658	0.014563	0.767136	359	4	0.39866
OLIG1	4	0.32008	0.45886	1	8589	1	0.13521	0.0041717	0.014577	0.767136	360	3	0.13521
SOX10	4	0.19795	0.32761	0.997	6206	1	0.18235	0.0042124	0.014722	0.772074	361	2	0.18235
ZFAND6	4	0.95505	0.95507	1	18102	0	0.7167	0.0042227	0.014751	0.772074	362	3	0.7167
GATS	4	0.99573	0.99572	1	18907	0	0.38643	0.0042693	0.014908	0.776203	363	4	0.38643
TRAPPC2L	4	0.94528	0.94529	1	17899	0	0.55671	0.0042708	0.014911	0.776203	364	3	0.55671
PDHA1	4	0.99058	0.99058	1	18792	0	0.47757	0.0043096	0.015038	0.780685	365	4	0.47757
CYB5R4	4	0.98458	0.98457	1	18671	0	0.37115	0.0043463	0.015163	0.784353	366	3	0.37115
PIP5K1A	4	0.98488	0.98487	1	18680	0	0.49273	0.0043627	0.015215	0.784353	367	3	0.49273
PBLD	4	0.99563	0.99562	1	18906	0	0.25923	0.0043685	0.015232	0.784353	368	4	0.25923
CCDC47	4	0.9956	0.99559	1	18905	0	0.63569	0.0043998	0.015326	0.787089	369	4	0.63569
RFWD3	4	0.99557	0.99556	1	18904	0	0.3892	0.004425	0.015393	0.78791	370	4	0.3892
PTPRT	4	0.72391	0.73289	1	13727	1	0.12464	0.0044337	0.015425	0.78791	371	2	0.12464
NUDT21	2	0.30517	0.33242	0.997	8296	1	0.58056	0.0044755	0.008703	0.647398	372	1	0.58056
ORM1	4	0.25658	0.39072	1	7399	1	0.20378	0.004486	0.01561	0.795261	373	2	0.20378
RBM33	4	0.74577	0.75044	1	14076	1	0.38968	0.0045004	0.01566	0.795647	374	3	0.38968
SRP54	3	0.2881	0.40061	1	7985	1	0.25716	0.0045065	0.012455	0.756734	375	1	0.25716
RSPH6A	4	0.89378	0.89371	1	16914	0	0.25134	0.0045384	0.015794	0.797351	376	2	0.25134
TAPT1	4	0.89322	0.89315	1	16907	0	0.23677	0.0045732	0.0159	0.797351	377	3	0.23677
RMND5B	4	0.96744	0.96748	1	18338	0	0.4018	0.0045749	0.015907	0.797351	378	3	0.4018
CALR3	4	0.82673	0.82671	1	15581	0	0.35659	0.0045908	0.015964	0.797351	379	3	0.35659
DRAM2	4	0.079724	0.17708	0.983623	3394	1	0.32126	0.0045992	0.015996	0.797351	380	2	0.32126
TGM3	4	0.99539	0.99539	1	18903	0	0.23107	0.0046081	0.016017	0.797351	381	4	0.23107
HIC2	4	0.99538	0.99538	1	18902	0	0.43349	0.0046212	0.016062	0.797351	382	4	0.43349
USP22	4	0.36058	0.50244	1	9390	2	0.10596	0.0046244	0.016072	0.797351	383	2	0.10596
TARBP2	4	0.99535	0.99535	1	18901	0	0.25115	0.0046511	0.016157	0.797351	384	4	0.25115
C9orf139	4	0.03201	0.082719	0.953565	1648	1	0.27933	0.0046617	0.016193	0.797351	385	3	0.27933
SNRNP70	4	0.99532	0.99533	1	18900	0	0.93078	0.0046801	0.016256	0.797351	386	4	0.93078
MRPL55	4	0.91282	0.91282	1	17256	0	0.78693	0.0046836	0.016264	0.797351	387	2	0.78693
ZNF415	4	0.90316	0.90318	1	17078	0	0.46983	0.0046921	0.016291	0.797351	388	3	0.46983
TPP2	4	0.99516	0.99517	1	18893	0	0.47871	0.0046997	0.016328	0.797351	389	4	0.47871
FBXW7	4	0.98757	0.98755	1	18736	0	0.59397	0.0047048	0.016342	0.797351	390	3	0.59397
PPM1K	4	0.46131	0.57566	1	10741	1	0.39468	0.0047329	0.016446	0.797351	391	3	0.39468
EIF2B4	4	0.34702	0.48786	1	9117	1	0.19541	0.0047388	0.016463	0.797351	392	2	0.19541
RHOU	4	0.99525	0.99525	1	18898	0	0.20505	0.004752	0.016513	0.797351	393	4	0.20505
ZMYND12	4	0.99525	0.99525	1	18897	0	0.30143	0.0047549	0.016521	0.797351	394	4	0.30143
NR2C1	4	0.99522	0.99523	1	18896	0	0.31535	0.0047758	0.016606	0.797351	395	4	0.31535
ARX	4	0.056596	0.13247	0.972813	2575	1	0.43965	0.0047987	0.016682	0.797351	396	3	0.43965
SAA1	4	0.80455	0.8045	1	15141	0	0.45095	0.0048003	0.016688	0.797351	397	3	0.45095
AP5B1	4	0.99519	0.99519	1	18895	0	0.41661	0.0048122	0.016725	0.797351	398	4	0.41661
IGSF9B	4	0.99518	0.99519	1	18894	0	0.26095	0.004817	0.016737	0.797351	399	4	0.26095
NAT2	4	0.058004	0.13516	0.972813	2623	2	-0.19462	0.0048527	0.016854	0.800933	400	1	-0.19462
RBFOX3	4	0.96145	0.96145	1	18221	0	0.24158	0.0049151	0.017058	0.804724	401	3	0.24158
GML	4	0.29349	0.4303	1	8076	1	0.41442	0.0049267	0.017101	0.804724	402	3	0.41442
SP1	4	0.99507	0.99509	1	18892	0	0.2879	0.0049275	0.017102	0.804724	403	4	0.2879
RXRA	4	0.99502	0.99503	1	18891	0	0.19827	0.0049805	0.017271	0.808665	404	4	0.19827
RBM15	4	0.59204	0.64423	1	12083	1	0.44222	0.0049935	0.01731	0.808665	405	2	0.44222
PHACTR4	4	0.436	0.56379	1	10540	1	0.07193	0.0050097	0.017359	0.808665	406	2	0.07193
EMP3	4	0.7676	0.76928	1	14438	1	0.35537	0.0050329	0.017444	0.808665	407	3	0.35537
CDH15	4	0.99495	0.99496	1	18890	0	0.36105	0.0050508	0.017502	0.808665	408	4	0.36105
ATP11AUN	4	0.98686	0.9868	1	18720	0	0.329	0.0050523	0.017505	0.808665	409	3	0.329
CHST3	4	0.82805	0.82804	1	15602	0	0.40769	0.0050593	0.017524	0.808665	410	3	0.40769
TOB2	4	0.98703	0.98698	1	18726	0	0.56096	0.0050819	0.017606	0.809785	411	3	0.56096
SLMO1	4	0.99491	0.99492	1	18889	0	0.2578	0.0050928	0.017646	0.809785	412	4	0.2578
ALG5	4	0.67428	0.6965	1	13038	1	0.37785	0.0051098	0.017704	0.809785	413	3	0.37785
C11orf74	4	0.31729	0.45591	1	8533	1	0.17668	0.0051145	0.017718	0.809785	414	2	0.17668
HMGB3	4	0.13813	0.26294	0.991872	4994	1	0.26688	0.0051668	0.017869	0.810325	415	3	0.26688
FREM2	4	0.99478	0.99479	1	18888	0	0.25868	0.0052202	0.018056	0.810325	416	4	0.25868
DHODH	4	0.99477	0.99478	1	18887	0	0.67642	0.0052335	0.018108	0.810325	417	4	0.67642
C1orf123	4	0.94988	0.94993	1	17990	0	0.36166	0.0052367	0.018116	0.810325	418	2	0.36166
DCXR	4	0.78577	0.7861	1	14770	1	0.44873	0.0052411	0.018127	0.810325	419	3	0.44873
USP12	4	0.99475	0.99477	1	18886	0	0.45078	0.005253	0.018176	0.810325	420	4	0.45078
RTN4RL2	4	0.99471	0.99474	1	18884	0	0.28466	0.00529	0.018295	0.810325	421	4	0.28466
MINOS1-NBL1	4	0.057535	0.13424	0.972813	2613	2	0.062802	0.0052949	0.018311	0.810325	422	2	0.062802
L3MBTL3	4	0.9947	0.99473	1	18883	0	0.3532	0.0052962	0.018315	0.810325	423	4	0.3532
LYG1	4	0.99469	0.99471	1	18882	0	0.28275	0.0053127	0.018368	0.810325	424	4	0.28275
SNRNP25	4	0.99462	0.99464	1	18881	0	0.69228	0.0053823	0.018583	0.810325	425	4	0.69228
RYR3	4	0.97035	0.97042	1	18400	0	0.38547	0.0053943	0.018623	0.810325	426	2	0.38547
PHOX2B	4	0.99459	0.99461	1	18880	0	0.48677	0.0054106	0.01868	0.810325	427	4	0.48677
APITD1-CORT	4	0.98641	0.98637	1	18712	0	0.47493	0.0054162	0.018699	0.810325	428	3	0.47493
UBXN6	4	0.20044	0.33034	0.997	6252	2	0.021989	0.0054286	0.018751	0.810325	429	2	0.021989
RPL18A	4	0.86564	0.86557	1	16338	0	1.0092	0.0054352	0.018778	0.810325	430	2	1.0092
BARX2	4	0.99456	0.99459	1	18879	0	0.40862	0.0054358	0.018778	0.810325	431	4	0.40862
DHRS13	4	0.99454	0.99456	1	18878	0	0.36724	0.0054632	0.018866	0.810325	432	4	0.36724
GAGE10	4	0.98639	0.98635	1	18711	0	0.42097	0.0054716	0.018896	0.810325	433	3	0.42097
MBD3L2	4	0.75395	0.75745	1	14211	1	0.35554	0.0054946	0.018981	0.810325	434	3	0.35554
GOLGA3	4	0.98763	0.98761	1	18739	0	0.4175	0.0055036	0.019008	0.810325	435	2	0.4175
NACC2	4	0.52851	0.60902	1	11388	1	0.45158	0.0055074	0.01902	0.810325	436	3	0.45158
GLIS1	4	0.56248	0.62731	1	11732	1	0.27508	0.0055082	0.019021	0.810325	437	2	0.27508
RPL37A	2	0.99448	0.99447	1	18877	0	1.3741	0.0055218	0.010684	0.714613	438	2	1.3741
SENP5	4	0.25524	0.38925	1	7373	1	0.12295	0.005522	0.019065	0.810325	439	2	0.12295
KRTAP2-1	4	0.99447	0.9945	1	18876	0	0.26396	0.0055258	0.019076	0.810325	440	4	0.26396
ZC3H12C	4	0.52014	0.6047	1	11306	1	0.48033	0.0055633	0.019184	0.810325	441	2	0.48033
EED	4	0.50329	0.59619	1	11136	1	0.7516	0.0055817	0.01925	0.810325	442	3	0.7516
LECT2	4	0.99439	0.99442	1	18875	0	0.35063	0.005605	0.019322	0.810325	443	4	0.35063
ZNF275	4	0.13172	0.25595	0.991872	4857	1	0.29754	0.0056279	0.019408	0.810325	444	2	0.29754
TAT	4	0.6474	0.6785	1	12711	1	0.30365	0.0056379	0.01944	0.810325	445	3	0.30365
CPT1A	4	0.99432	0.99435	1	18874	0	0.38353	0.0056819	0.019578	0.810325	446	4	0.38353
PDCD6	4	0.77524	0.77615	1	14575	1	0.43162	0.0056928	0.019615	0.810325	447	3	0.43162
BTRC	4	0.99429	0.99433	1	18873	0	0.22944	0.005708	0.019658	0.810325	448	4	0.22944
C18orf32	4	0.90626	0.90627	1	17139	0	0.42306	0.0057135	0.019679	0.810325	449	3	0.42306
RHOV	4	0.86743	0.86732	1	16368	0	0.46586	0.0057255	0.019727	0.810325	450	3	0.46586
WBP11	4	0.99427	0.99431	1	18872	0	0.33025	0.0057299	0.019741	0.810325	451	4	0.33025
CEP85	4	0.96923	0.96927	1	18377	0	0.70911	0.0057342	0.019754	0.810325	452	3	0.70911
CCT8	4	0.99161	0.99165	1	18811	0	1.2748	0.005736	0.01976	0.810325	453	4	1.2748
FREM1	4	0.71412	0.72519	1	13568	1	0.15035	0.0057426	0.019777	0.810325	454	2	0.15035
CHST6	4	0.79537	0.79536	1	14965	1	0.54847	0.0057442	0.019783	0.810325	455	3	0.54847
MAGED4	4	0.75478	0.75815	1	14226	1	0.72953	0.0057492	0.019794	0.810325	456	3	0.72953
ZNF134	4	0.62669	0.6652	1	12472	1	0.17034	0.0057535	0.01981	0.810325	457	2	0.17034
CRIPT	4	0.93066	0.9308	1	17611	0	0.48312	0.0057681	0.01985	0.810325	458	3	0.48312
CAPZA1	4	0.99422	0.99426	1	18871	0	0.21289	0.0057837	0.019897	0.810325	459	4	0.21289
SIGLEC8	4	0.99421	0.99425	1	18870	0	0.16009	0.0057903	0.019918	0.810325	460	4	0.16009
NFIX	4	0.92201	0.92217	1	17434	0	0.3623	0.0057949	0.019938	0.810325	461	3	0.3623
C9orf152	4	0.9942	0.99424	1	18869	0	0.15147	0.0058035	0.01996	0.810325	462	4	0.15147
RMDN3	4	0.95506	0.95508	1	18104	0	0.58798	0.0058079	0.019974	0.810325	463	3	0.58798
PHLDB3	4	0.28028	0.4162	1	7835	1	0.38098	0.0058212	0.02002	0.810325	464	3	0.38098
ORAI3	4	0.99418	0.99422	1	18868	0	0.2666	0.0058224	0.020023	0.810325	465	4	0.2666
SLC35F3	4	0.99417	0.99422	1	18867	0	0.32817	0.0058257	0.020034	0.810325	466	4	0.32817
CPA2	4	0.24256	0.37561	0.999639	7138	1	0.39927	0.0058402	0.020083	0.810325	467	3	0.39927
MAK16	4	0.085772	0.1884	0.984956	3603	3	-0.75242	0.0058472	0.020105	0.810325	468	1	-0.75242
MLLT4	4	0.65213	0.68157	1	12763	1	0.35765	0.0058663	0.020174	0.811371	469	2	0.35765
CDHR4	4	0.96829	0.96835	1	18356	0	0.25315	0.0058996	0.020285	0.814138	470	2	0.25315
BTG3	4	0.56488	0.62863	1	11759	1	0.12265	0.0059231	0.020369	0.815794	471	2	0.12265
POF1B	4	0.20652	0.33691	0.997	6381	1	0.24528	0.0059563	0.020486	0.818748	472	2	0.24528
KHDRBS1	4	0.88657	0.88652	1	16762	0	0.31337	0.0059881	0.020605	0.821772	473	3	0.31337
CAMTA2	4	0.26692	0.40182	1	7591	1	0.48865	0.0060087	0.020679	0.823009	474	3	0.48865
FXYD1	3	0.7342	0.73436	1	13888	0	-0.015202	0.0060384	0.016529	0.797351	475	1	-0.015202
OSGIN2	4	0.13761	0.26238	0.991872	4982	1	0.36504	0.0060541	0.020834	0.824437	476	3	0.36504
LOC101060389	4	0.8374	0.83735	1	15794	0	0.03356	0.0060565	0.020844	0.824437	477	1	0.03356
ASXL2	4	0.48861	0.58886	1	10992	1	0.25203	0.0060806	0.02092	0.82512	478	2	0.25203
ARHGEF6	4	0.66853	0.69251	1	12960	1	0.34534	0.0060913	0.020948	0.82512	479	3	0.34534
C14orf142	4	0.99388	0.99392	1	18863	0	0.30077	0.0061181	0.021029	0.825289	480	4	0.30077
PLA2G16	4	0.99388	0.99392	1	18862	0	0.29997	0.0061215	0.021038	0.825289	481	4	0.29997
ARHGDIB	4	0.1827	0.31118	0.996566	5913	1	0.1491	0.0061611	0.021174	0.827877	482	2	0.1491
ARG2	4	0.11724	0.24022	0.991872	4562	2	0.2017	0.0061673	0.021195	0.827877	483	2	0.2017
HOXD10	3	0.99382	0.99394	1	18860	0	0.30648	0.0061837	0.01691	0.801599	484	3	0.30648
BCL9L	4	0.9938	0.99384	1	18859	0	0.34576	0.0061972	0.021285	0.827877	485	4	0.34576
KIAA1715	4	0.99379	0.99382	1	18858	0	0.22298	0.0062117	0.021332	0.827877	486	4	0.22298
ACOT12	4	0.55945	0.62561	1	11694	1	-0.035727	0.0062135	0.021336	0.827877	487	1	-0.035727
ZNF37A	4	0.66678	0.69132	1	12935	1	0.59413	0.0062213	0.021364	0.827877	488	3	0.59413
IRF2	4	0.99375	0.99379	1	18856	0	0.38325	0.0062502	0.021462	0.82999	489	4	0.38325
GNA15	4	0.97061	0.97068	1	18404	0	0.29226	0.006295	0.021591	0.833273	490	3	0.29226
FAM195B	4	0.13559	0.26017	0.991872	4936	1	0.27819	0.0063181	0.021667	0.834045	491	3	0.27819
TRIM68	3	0.99365	0.99379	1	18855	0	0.26854	0.0063458	0.017325	0.808665	492	3	0.26854
AIPL1	4	0.99365	0.99369	1	18854	0	0.25326	0.0063495	0.021766	0.834045	493	4	0.25326
WDR26	4	0.95334	0.9534	1	18060	0	0.36442	0.0063621	0.02181	0.834045	494	3	0.36442
NUDT4	4	0.99364	0.99367	1	18853	0	0.35937	0.0063631	0.021814	0.834045	495	4	0.35937
ELMO3	4	0.12484	0.24847	0.991872	4718	2	0.027472	0.0063704	0.021841	0.834045	496	2	0.027472
B9D1	4	0.99362	0.99365	1	18852	0	0.23634	0.0063797	0.021873	0.834045	497	4	0.23634
GCG	4	0.85592	0.85584	1	16166	0	0.45593	0.0064157	0.021981	0.835189	498	3	0.45593
MPHOSPH10	4	0.53066	0.61013	1	11409	1	0.89321	0.0064211	0.021995	0.835189	499	3	0.89321
FRG1	4	0.45527	0.57275	1	10697	1	0.36009	0.0064359	0.022049	0.835189	500	2	0.36009
SAR1B	4	0.96225	0.96227	1	18238	0	0.40883	0.0064705	0.022152	0.835189	501	3	0.40883
TSPAN32	4	0.96354	0.96358	1	18262	0	0.28552	0.0064725	0.022158	0.835189	502	3	0.28552
NRM	4	0.98003	0.98012	1	18585	0	0.19225	0.006475	0.022165	0.835189	503	2	0.19225
HEBP1	4	0.99349	0.99354	1	18851	0	0.22688	0.0065052	0.022262	0.836779	504	4	0.22688
KRT85	4	0.99348	0.99352	1	18850	0	0.34865	0.0065245	0.022333	0.836779	505	4	0.34865
NAT14	4	0.53965	0.61489	1	11505	1	0.11693	0.0065273	0.022339	0.836779	506	2	0.11693
TBL1XR1	4	0.21592	0.34709	0.997	6572	2	-0.18256	0.0065796	0.022507	0.839934	507	1	-0.18256
OR2A7	4	0.13996	0.26492	0.991872	5031	1	0.36128	0.0065848	0.022525	0.839934	508	3	0.36128
ZNF320	4	0.46982	0.57966	1	10825	1	0.39562	0.0065947	0.022555	0.839934	509	3	0.39562
QRICH1	4	0.98716	0.98712	1	18729	0	0.58657	0.0066297	0.022673	0.842711	510	3	0.58657
TXNDC12	4	0.97929	0.97942	1	18575	0	0.50837	0.0066739	0.022819	0.846295	511	3	0.50837
SCUBE3	4	0.99295	0.99297	1	18842	0	0.55057	0.0066849	0.022858	0.846295	512	4	0.55057
PTPRN2	4	0.44629	0.56851	1	10619	1	0.34302	0.0066988	0.022909	0.846516	513	3	0.34302
MRPL33	3	0.42718	0.48455	1	10469	1	0.9636	0.0067057	0.018251	0.810325	514	2	0.9636
MRPL28	3	0.87051	0.87062	1	16432	0	0.14336	0.0067057	0.018251	0.810325	515	1	0.14336
REG3G	4	0.89241	0.89234	1	16887	0	0.32017	0.0067302	0.023025	0.848158	516	3	0.32017
CSTF3	4	0.6752	0.69714	1	13043	1	0.43132	0.0067888	0.023205	0.848158	517	3	0.43132
MYO1F	4	0.99317	0.99321	1	18848	0	0.59476	0.0068264	0.023321	0.848158	518	4	0.59476
TSPAN10	4	0.99316	0.99319	1	18847	0	0.21014	0.0068389	0.023354	0.848158	519	4	0.21014
SPAG4	4	0.035544	0.09011	0.964296	1778	1	0.30521	0.0068411	0.023361	0.848158	520	3	0.30521
GRIN2B	4	0.99315	0.99318	1	18846	0	0.28919	0.0068501	0.023393	0.848158	521	4	0.28919
RBCK1	4	0.1501	0.27586	0.991872	5263	1	0.47075	0.0068933	0.023523	0.848158	522	3	0.47075
C11orf73	4	0.40251	0.54745	1	10233	1	0.45032	0.0068941	0.023527	0.848158	523	3	0.45032
MUS81	4	0.98283	0.98285	1	18634	0	0.37381	0.0069153	0.023587	0.848158	524	3	0.37381
ARHGEF33	4	0.97057	0.97064	1	18403	0	0.50728	0.0069281	0.023628	0.848158	525	3	0.50728
TMPRSS11B	4	0.99305	0.99307	1	18845	0	0.22224	0.0069533	0.023704	0.848158	526	4	0.22224
KPNA7	4	0.9653	0.96535	1	18299	0	0.31859	0.0069579	0.023719	0.848158	527	3	0.31859
PRSS42	4	0.99303	0.99305	1	18844	0	0.27022	0.0069749	0.023787	0.848158	528	4	0.27022
FUCA1	4	0.99299	0.99302	1	18843	0	0.20511	0.0070092	0.023907	0.848158	529	4	0.20511
DARS2	4	0.53792	0.61393	1	11485	1	0.95722	0.0070126	0.023918	0.848158	530	2	0.95722
GSK3A	4	0.93707	0.93718	1	17734	0	0.44734	0.0070328	0.023977	0.848158	531	3	0.44734
KIR3DL1	4	0.90976	0.90977	1	17203	0	0.26903	0.0070461	0.024019	0.848158	532	2	0.26903
SRL	4	0.42864	0.56049	1	10481	1	0.1785	0.0070502	0.024034	0.848158	533	2	0.1785
FLT4	4	0.73905	0.74481	1	13968	1	0.26453	0.0070512	0.024038	0.848158	534	2	0.26453
SPECC1L	4	0.99292	0.99295	1	18841	0	0.27837	0.0070807	0.024139	0.848158	535	4	0.27837
PDCL	4	0.6396	0.67341	1	12608	1	0.48432	0.0070822	0.024145	0.848158	536	3	0.48432
UAP1	4	0.39609	0.54054	1	10107	1	0.43878	0.007108	0.024236	0.848158	537	2	0.43878
TRMT44	4	0.98651	0.98646	1	18713	0	0.32724	0.0071276	0.024305	0.848158	538	3	0.32724
CLEC2A	4	0.50475	0.59688	1	11150	1	0.18678	0.0071339	0.024324	0.848158	539	2	0.18678
OTOS	4	0.90302	0.90304	1	17075	0	0.35466	0.0071384	0.024337	0.848158	540	3	0.35466
EIF4H	4	0.85792	0.85781	1	16196	0	0.45651	0.0071428	0.024356	0.848158	541	3	0.45651
ENO4	4	0.96208	0.96209	1	18234	0	0.11714	0.0071547	0.024397	0.848158	542	1	0.11714
LCP1	4	0.024545	0.067097	0.946996	1337	2	0.12392	0.0071754	0.024462	0.848158	543	2	0.12392
NSL1	4	0.93168	0.9318	1	17631	0	0.64042	0.0071806	0.024482	0.848158	544	2	0.64042
FOXS1	4	0.99281	0.99284	1	18840	0	0.19549	0.0071891	0.024507	0.848158	545	4	0.19549
COLQ	4	0.9928	0.99284	1	18839	0	0.20629	0.0071956	0.024526	0.848158	546	4	0.20629
ARHGEF18	4	0.99132	0.99135	1	18802	0	0.51165	0.0072058	0.024554	0.848158	547	4	0.51165
RELL1	4	0.97297	0.97312	1	18450	0	0.40074	0.0072255	0.02461	0.848158	548	3	0.40074
POU5F1B	4	0.99277	0.9928	1	18838	0	0.29992	0.0072294	0.024619	0.848158	549	4	0.29992
SRPR	4	0.96424	0.9643	1	18277	0	0.44946	0.007232	0.024626	0.848158	550	3	0.44946
CXCR2	4	0.93611	0.93618	1	17717	0	0.5656	0.0072364	0.024644	0.848158	551	3	0.5656
MROH9	4	0.99275	0.99279	1	18837	0	0.2185	0.0072451	0.024668	0.848158	552	4	0.2185
ACSS3	4	0.41466	0.55425	1	10356	1	0.13296	0.0072588	0.024714	0.848158	553	2	0.13296
TNFRSF10C	4	0.81525	0.81519	1	15357	0	0.2974	0.007264	0.024728	0.848158	554	3	0.2974
KCNA5	4	0.9685	0.96858	1	18360	0	0.3762	0.0072714	0.024754	0.848158	555	3	0.3762
HUWE1	4	0.94773	0.94779	1	17941	0	1.0744	0.0072912	0.02482	0.848158	556	3	1.0744
CDC26	4	0.055942	0.13118	0.972795	2557	1	0.63463	0.0073308	0.024947	0.848158	557	3	0.63463
INTS5	3	0.99266	0.99277	1	18836	0	0.97346	0.0073438	0.019949	0.810325	558	3	0.97346
TMEM8B	4	0.43815	0.56476	1	10556	1	0.48467	0.007344	0.024988	0.848158	559	3	0.48467
FAM185A	4	0.99265	0.99269	1	18835	0	0.18235	0.0073461	0.024991	0.848158	560	4	0.18235
ZBED6CL	4	0.22495	0.35682	0.997246	6783	1	0.37234	0.0073617	0.025032	0.848158	561	3	0.37234
RAD50	4	0.36714	0.50949	1	9520	1	0.079566	0.0073638	0.02504	0.848158	562	1	0.079566
KLF3	4	0.9926	0.99264	1	18834	0	0.41102	0.0073957	0.025142	0.848287	563	4	0.41102
ZNF30	4	0.9926	0.99263	1	18833	0	0.35463	0.0074003	0.025153	0.848287	564	4	0.35463
UBAC1	4	0.26399	0.39879	1	7543	2	0.17638	0.0074163	0.025206	0.848287	565	2	0.17638
RNASE3	4	0.99258	0.99261	1	18832	0	0.44038	0.0074216	0.025221	0.848287	566	4	0.44038
FAM184B	4	0.99254	0.99257	1	18831	0	0.31072	0.0074628	0.025355	0.849878	567	4	0.31072
ZNF417	4	0.37683	0.5199	1	9708	2	0.2729	0.0074692	0.025374	0.849878	568	2	0.2729
LILRB5	4	0.82273	0.8227	1	15510	0	0.37392	0.0074798	0.025406	0.849878	569	3	0.37392
SH2B1	4	0.99249	0.99252	1	18829	0	0.33684	0.0075083	0.025504	0.849878	570	4	0.33684
SNX30	4	0.99248	0.99251	1	18828	0	0.21609	0.0075164	0.025528	0.849878	571	4	0.21609
SIN3A	4	0.078736	0.17515	0.983592	3350	1	0.46095	0.0075206	0.025537	0.849878	572	2	0.46095
ESYT2	4	0.73625	0.74251	1	13921	1	0.51625	0.0075421	0.025602	0.849878	573	3	0.51625
TMEM202	4	0.87816	0.87815	1	16588	0	0.35128	0.0075488	0.025624	0.849878	574	3	0.35128
PANK4	4	0.99241	0.99243	1	18827	0	0.31548	0.0075945	0.025769	0.853193	575	4	0.31548
MFAP3L	4	0.56597	0.62922	1	11774	1	0.084713	0.0076251	0.025856	0.854594	576	1	0.084713
MRPL43	3	0.99233	0.99244	1	18826	0	1.1821	0.0076672	0.020787	0.824437	577	3	1.1821
SUCO	4	0.90075	0.90073	1	17042	0	0.32264	0.007677	0.025998	0.857804	578	3	0.32264
POMT2	4	0.99229	0.99231	1	18825	0	0.29621	0.0077142	0.026111	0.860029	579	4	0.29621
CSNK1E	4	0.5274	0.60845	1	11376	1	0.33391	0.0077459	0.026217	0.860941	580	3	0.33391
BIK	4	0.013476	0.043011	0.926721	863	3	-0.32298	0.0077819	0.026337	0.860941	581	1	-0.32298
AMZ2	4	0.92937	0.9295	1	17582	0	0.44775	0.0077985	0.026388	0.860941	582	3	0.44775
UQCC3	4	0.9913	0.99132	1	18801	0	0.52465	0.0078031	0.026403	0.860941	583	4	0.52465
CBL	4	0.99217	0.99219	1	18824	0	0.27818	0.0078311	0.026491	0.860941	584	4	0.27818
TAS2R19	4	0.7517	0.7555	1	14164	1	0.18182	0.0078341	0.026506	0.860941	585	2	0.18182
ARL15	4	0.99216	0.99219	1	18823	0	0.42473	0.0078353	0.02651	0.860941	586	4	0.42473
SDK2	4	0.28707	0.42344	1	7961	1	0.34188	0.0078537	0.026568	0.860941	587	3	0.34188
CADM1	4	0.99214	0.99217	1	18822	0	0.26414	0.0078574	0.02658	0.860941	588	4	0.26414
PSTK	4	0.98683	0.98676	1	18719	0	0.5743	0.0078606	0.026589	0.860941	589	3	0.5743
GDA	4	0.67048	0.69386	1	12983	1	0.2169	0.0078985	0.026709	0.863047	590	2	0.2169
PNLIPRP2	4	0.83886	0.83876	1	15825	0	0.15865	0.0079203	0.026782	0.863047	591	2	0.15865
PDE3B	4	0.33387	0.47366	1	8866	1	0.33535	0.0079508	0.026862	0.863911	592	3	0.33535
SULT2B1	4	0.91564	0.91569	1	17313	0	0.3048	0.0079857	0.026979	0.864767	593	3	0.3048
ZNF446	4	0.67228	0.69509	1	13009	1	0.55547	0.0079857	0.026979	0.864767	594	3	0.55547
FTMT	4	0.932	0.93211	1	17637	0	0.47877	0.0080185	0.027079	0.864959	595	3	0.47877
PLEKHN1	4	0.94948	0.94953	1	17980	0	0.32993	0.0080295	0.027123	0.864959	596	3	0.32993
OBP2B	4	0.99195	0.99196	1	18821	0	0.28695	0.0080534	0.027194	0.864959	597	4	0.28695
SCAF8	4	0.99194	0.99196	1	18820	0	0.28318	0.0080647	0.027237	0.864959	598	4	0.28318
RPP25	4	0.6454	0.67716	1	12685	1	0.52056	0.0080909	0.027325	0.864959	599	3	0.52056
ZNF765	4	0.93371	0.93381	1	17668	0	0.31032	0.0080932	0.027334	0.864959	600	3	0.31032
TM4SF4	4	0.70535	0.71865	1	13443	1	0.42242	0.0081144	0.027395	0.864959	601	3	0.42242
ART4	4	0.99188	0.99191	1	18819	0	0.30473	0.0081186	0.027415	0.864959	602	4	0.30473
FAM53B	4	0.93381	0.9339	1	17673	0	0.17949	0.0081395	0.027471	0.864959	603	2	0.17949
TUBA1B	4	0.90345	0.90348	1	17082	0	0.54826	0.0081671	0.02756	0.864959	604	2	0.54826
ATP8B3	4	0.17767	0.30579	0.996566	5799	1	0.45273	0.008171	0.027572	0.864959	605	3	0.45273
PALD1	4	0.11836	0.24142	0.991872	4585	1	0.45461	0.0081757	0.027586	0.864959	606	3	0.45461
ADRBK1	4	0.99181	0.99183	1	18818	0	0.23157	0.0081942	0.027645	0.864959	607	4	0.23157
NOL3	4	0.62364	0.66335	1	12435	1	0.20751	0.0081947	0.027646	0.864959	608	2	0.20751
BRPF3	4	0.79257	0.79263	1	14905	1	0.061435	0.0081998	0.027664	0.864959	609	1	0.061435
MCPH1	4	0.99175	0.99178	1	18817	0	0.43675	0.0082502	0.027821	0.865885	610	4	0.43675
HEG1	4	0.059059	0.1372	0.972813	2666	2	-0.0013363	0.0082521	0.027829	0.865885	611	2	-0.0013363
MAL2	4	0.99171	0.99173	1	18816	0	0.30416	0.0082949	0.027965	0.867454	612	4	0.30416
OTUB1	4	0.25176	0.38549	1	7312	1	0.51948	0.0082968	0.027971	0.867454	613	3	0.51948
DPPA2	4	0.30848	0.44636	1	8364	1	0.28158	0.0083224	0.028048	0.868439	614	2	0.28158
SPTA1	4	0.99165	0.99168	1	18815	0	0.31937	0.0083543	0.028152	0.869193	615	4	0.31937
HMGB2	4	0.99162	0.99166	1	18812	0	0.17082	0.0083819	0.028237	0.869193	616	4	0.17082
ARID3A	4	0.38434	0.52787	1	9849	1	-0.0055717	0.0084087	0.028317	0.869193	617	1	-0.0055717
ODF2L	4	0.067638	0.15396	0.980196	2966	2	0.074177	0.008423	0.028366	0.869193	618	2	0.074177
TGDS	4	0.95522	0.95526	1	18106	0	0.22849	0.008436	0.028409	0.869193	619	3	0.22849
OPN3	4	0.99155	0.99158	1	18809	0	0.2499	0.0084505	0.028459	0.869193	620	4	0.2499
AFAP1L1	4	0.9544	0.95442	1	18090	0	0.41954	0.0084528	0.028467	0.869193	621	3	0.41954
TMEM191C	4	0.99154	0.99157	1	18808	0	0.27769	0.0084608	0.028496	0.869193	622	4	0.27769
SMEK2	4	0.84052	0.8404	1	15864	0	0.027533	0.008461	0.028497	0.869193	623	1	0.027533
OR13H1	4	0.38101	0.52433	1	9775	1	0.30606	0.0084904	0.028591	0.869193	624	3	0.30606
TNFRSF10B	4	0.99043	0.99043	1	18788	0	0.33636	0.0085017	0.028626	0.869193	625	4	0.33636
OR8B12	4	0.99149	0.99153	1	18807	0	0.36323	0.0085093	0.02865	0.869193	626	4	0.36323
GPAA1	4	0.9141	0.91412	1	17286	0	0.44222	0.0085303	0.028714	0.869193	627	3	0.44222
RNASE12	4	0.26462	0.39943	1	7556	2	0.12545	0.0085637	0.028825	0.869193	628	2	0.12545
SRM	4	0.65105	0.68089	1	12752	1	0.16921	0.0085694	0.028848	0.869193	629	2	0.16921
HPCAL1	4	0.95685	0.95686	1	18132	0	0.33794	0.008575	0.028866	0.869193	630	2	0.33794
SIRT2	4	0.99141	0.99145	1	18806	0	0.39588	0.0085876	0.02891	0.869193	631	4	0.39588
UNC5CL	4	0.053877	0.12711	0.972335	2459	1	0.34489	0.0085961	0.028937	0.869193	632	3	0.34489
NGLY1	4	0.99138	0.99142	1	18805	0	0.56185	0.0086188	0.029009	0.870005	633	4	0.56185
LACTB	4	0.99136	0.99139	1	18804	0	0.4549	0.0086388	0.029085	0.870492	634	4	0.4549
ATM	4	0.76104	0.76349	1	14328	1	0.36413	0.0086597	0.029159	0.870492	635	3	0.36413
SPATA31A1	4	0.99133	0.99136	1	18803	0	0.33958	0.0086664	0.029185	0.870492	636	4	0.33958
TXLNA	4	0.16335	0.2903	0.996566	5508	1	0.41578	0.0087064	0.029317	0.872374	637	3	0.41578
TMEM52B	4	0.65411	0.68288	1	12783	1	0.29771	0.008774	0.029542	0.87578	638	2	0.29771
FAM213B	4	0.88548	0.88542	1	16740	0	0.32474	0.0087911	0.029598	0.87578	639	3	0.32474
TSPAN31	4	0.3417	0.48217	1	9016	1	0.56321	0.0087968	0.029619	0.87578	640	3	0.56321
OXGR1	4	0.99119	0.99121	1	18800	0	0.20562	0.0088106	0.029661	0.87578	641	4	0.20562
S100A7	4	0.88601	0.88598	1	16748	0	0.4362	0.0088265	0.02971	0.87578	642	3	0.4362
GPC3	4	0.406	0.55039	1	10289	1	0.36266	0.0088427	0.029752	0.87578	643	3	0.36266
INPP5D	4	0.81309	0.81306	1	15314	0	0.28404	0.0088829	0.029877	0.877089	644	2	0.28404
CTNNBIP1	4	0.13616	0.26081	0.991872	4953	1	0.26318	0.0088872	0.029888	0.877089	645	3	0.26318
ATP2B1	4	0.78694	0.78721	1	14795	1	0.84359	0.0089171	0.029989	0.87736	646	3	0.84359
HDC	4	0.59388	0.6453	1	12101	1	0.3236	0.0089174	0.029989	0.87736	647	2	0.3236
DRD2	4	0.99105	0.99106	1	18799	0	0.23727	0.0089474	0.030085	0.878804	648	4	0.23727
BOLA2	4	0.99099	0.991	1	18798	0	0.37968	0.0090088	0.030285	0.882222	649	4	0.37968
GIMAP8	4	0.87511	0.87508	1	16530	0	0.40263	0.0090124	0.030294	0.882222	650	3	0.40263
CTRB1	4	0.93648	0.93655	1	17726	0	0.035909	0.0090353	0.030373	0.88317	651	1	0.035909
ZNF106	4	0.88208	0.88204	1	16678	0	0.19339	0.0090875	0.030542	0.884796	652	2	0.19339
RELA	4	0.99091	0.99091	1	18797	0	0.38604	0.009092	0.030555	0.884796	653	4	0.38604
ASF1B	4	0.16833	0.29571	0.996566	5619	1	0.23804	0.0091375	0.030698	0.884914	654	2	0.23804
OR10Q1	4	0.29471	0.43157	1	8093	2	0.049581	0.0091397	0.030706	0.884914	655	2	0.049581
ATF2	4	0.67205	0.69495	1	13002	1	0.30532	0.0091433	0.030711	0.884914	656	2	0.30532
IQSEC2	4	0.7272	0.73544	1	13780	1	0.3172	0.0091718	0.030811	0.886006	657	3	0.3172
HNRNPA3	4	0.069012	0.15658	0.980365	3017	2	-0.13886	0.0091919	0.030871	0.886006	658	1	-0.13886
COPS4	3	0.76304	0.76336	1	14356	0	0.45937	0.009215	0.024792	0.848158	659	2	0.45937
USP10	4	0.97684	0.97703	1	18537	0	0.28349	0.0092192	0.030972	0.886006	660	3	0.28349
AVPR1B	4	0.99077	0.99076	1	18796	0	0.33253	0.0092337	0.03102	0.886006	661	4	0.33253
DNTTIP1	4	0.45477	0.57252	1	10691	1	0.0049306	0.0092441	0.03105	0.886006	662	1	0.0049306
NAA30	4	0.92455	0.9247	1	17488	0	0.45478	0.0092611	0.031101	0.886006	663	3	0.45478
GATB	4	0.52961	0.60959	1	11397	1	0.89058	0.0092778	0.03115	0.886006	664	2	0.89058
TIMM9	4	0.99071	0.99072	1	18795	0	0.98467	0.009287	0.031185	0.886006	665	4	0.98467
AGO3	4	0.86706	0.86693	1	16360	0	0.47193	0.0092895	0.031195	0.886006	666	3	0.47193
CXorf51A	4	0.85222	0.85207	1	16079	0	0.2001	0.0092963	0.031212	0.886006	667	2	0.2001
ZNF804B	4	0.99034	0.99034	1	18787	0	0.34335	0.0093355	0.031326	0.886233	668	3	0.34335
KBTBD3	4	0.12774	0.25159	0.991872	4780	2	0.07474	0.0093424	0.031349	0.886233	669	2	0.07474
AKAP2	4	0.50139	0.59524	1	11113	1	-0.080204	0.0093485	0.031369	0.886233	670	1	-0.080204
ZNF135	4	0.98528	0.98527	1	18690	0	0.25745	0.0093741	0.031464	0.886233	671	3	0.25745
MAPK15	4	0.99062	0.99062	1	18793	0	0.51667	0.0093754	0.031471	0.886233	672	4	0.51667
CLDN4	4	0.9851	0.98509	1	18687	0	0.31315	0.0093896	0.031509	0.886233	673	3	0.31315
GP1BA	4	0.46923	0.5794	1	10822	1	0.37549	0.0094006	0.031545	0.886233	674	2	0.37549
CHCHD7	4	0.99056	0.99055	1	18791	0	0.18201	0.0094389	0.031656	0.888043	675	4	0.18201
SPINK6	4	0.99053	0.99053	1	18790	0	0.14777	0.0094692	0.031761	0.889154	676	4	0.14777
OLFML1	4	0.12556	0.24924	0.991872	4736	1	0.20852	0.0094782	0.031789	0.889154	677	2	0.20852
HDAC1	4	0.99044	0.99043	1	18789	0	0.19053	0.009562	0.032054	0.88999	678	4	0.19053
CEP350	4	0.64615	0.67767	1	12697	1	0.49433	0.0095673	0.032074	0.88999	679	2	0.49433
BTBD16	4	0.94822	0.94828	1	17952	0	0.48017	0.0095898	0.032146	0.88999	680	3	0.48017
DKK3	4	0.11722	0.2402	0.991872	4561	2	0.13478	0.0096094	0.032196	0.88999	681	2	0.13478
NUP210	4	0.9487	0.94875	1	17964	0	0.56286	0.0096134	0.032205	0.88999	682	3	0.56286
PTPRCAP	4	0.3604	0.50222	1	9387	1	0.43007	0.0096239	0.032226	0.88999	683	3	0.43007
CNTF	4	0.98924	0.98923	1	18768	0	0.53407	0.0096291	0.032239	0.88999	684	3	0.53407
ZBTB26	4	0.53185	0.61073	1	11423	1	0.43224	0.0096685	0.032331	0.88999	685	3	0.43224
HUS1	4	0.27682	0.41242	1	7772	1	1.0552	0.0096764	0.032347	0.88999	686	3	1.0552
C9orf91	4	0.052515	0.12439	0.972335	2415	1	0.30581	0.0096807	0.032356	0.88999	687	3	0.30581
BARHL1	4	0.72635	0.7348	1	13762	1	0.38845	0.0097137	0.032448	0.88999	688	3	0.38845
CCL25	4	0.37115	0.51379	1	9596	2	0.19876	0.0097167	0.032455	0.88999	689	2	0.19876
VPS33A	4	0.9671	0.96715	1	18331	0	0.60464	0.0097467	0.032517	0.88999	690	3	0.60464
ZNF367	4	0.27901	0.41481	1	7809	1	0.32336	0.0097953	0.032624	0.89162	691	3	0.32336
RXRB	4	0.87659	0.87657	1	16560	0	0.28137	0.0098181	0.032676	0.891775	692	2	0.28137
CHD9	4	0.23493	0.36752	0.997529	6990	1	0.25287	0.009843	0.032728	0.891915	693	3	0.25287
ARGFX	4	0.09323	0.20227	0.986491	3863	1	0.36563	0.0098913	0.032835	0.89355	694	2	0.36563
GPATCH2	4	0.72993	0.73755	1	13819	1	0.17837	0.0099224	0.032902	0.89411	695	2	0.17837
SCN11A	4	0.85748	0.85738	1	16191	0	0.45756	0.0099883	0.033056	0.896115	696	3	0.45756
SLPI	4	0.75771	0.76065	1	14274	1	0.32677	0.01	0.033077	0.896115	697	2	0.32677
DEPDC1B	4	0.11659	0.23952	0.991872	4552	1	0.42568	0.010027	0.033143	0.896115	698	3	0.42568
HIST1H1B	4	0.91825	0.91827	1	17357	0	0.47176	0.010101	0.033305	0.896115	699	3	0.47176
CLVS2	4	0.73324	0.74018	1	13871	1	0.42058	0.010117	0.033347	0.896115	700	3	0.42058
HYPK	4	0.90269	0.90271	1	17065	0	0.24579	0.010131	0.033376	0.896115	701	2	0.24579
GPR4	4	0.93719	0.9373	1	17737	0	0.18255	0.010183	0.033501	0.896115	702	2	0.18255
OR2W3	4	0.91115	0.91113	1	17232	0	0.37369	0.010184	0.033501	0.896115	703	3	0.37369
ACOX3	4	0.26304	0.39775	1	7522	1	0.30096	0.01019	0.033516	0.896115	704	3	0.30096
TP73	4	0.97949	0.97961	1	18579	0	0.16588	0.01019	0.033518	0.896115	705	3	0.16588
SELP	4	0.72122	0.73078	1	13683	1	0.14317	0.010235	0.033617	0.896115	706	2	0.14317
SLC26A3	4	0.85571	0.8556	1	16161	0	0.25523	0.010253	0.033661	0.896115	707	3	0.25523
CNFN	4	0.94326	0.94338	1	17855	0	0.2075	0.010282	0.033731	0.896115	708	2	0.2075
FAM129B	4	0.13568	0.26028	0.991872	4940	1	0.08888	0.010288	0.033742	0.896115	709	2	0.08888
NDUFA6	4	0.77831	0.77896	1	14639	1	0.81656	0.010288	0.033744	0.896115	710	3	0.81656
PDE7A	4	0.6022	0.65028	1	12193	1	0.5327	0.010294	0.033758	0.896115	711	3	0.5327
GTF3C1	4	0.82237	0.82233	1	15499	0	0.59662	0.010299	0.033773	0.896115	712	3	0.59662
PPTC7	4	0.64177	0.6748	1	12630	1	0.080487	0.01034	0.033871	0.896856	713	2	0.080487
POLR2B	3	0.27679	0.39441	1	7771	1	-0.15663	0.01039	0.027814	0.865885	714	1	-0.15663
VAX1	4	0.25283	0.38667	1	7335	1	0.0014714	0.010392	0.034008	0.89816	715	1	0.0014714
GTPBP8	4	0.93074	0.93088	1	17613	0	1.0313	0.01042	0.034083	0.89816	716	3	1.0313
KEL	4	0.97465	0.9748	1	18489	0	0.4608	0.010436	0.034117	0.89816	717	3	0.4608
CKMT2	4	0.90391	0.90394	1	17092	0	0.17972	0.010444	0.034132	0.89816	718	2	0.17972
RNASET2	4	0.69923	0.7142	1	13354	1	0.25036	0.010474	0.034205	0.898831	719	2	0.25036
PNMA1	4	0.98592	0.9859	1	18703	0	0.27588	0.010612	0.034517	0.899604	720	3	0.27588
ZBED2	4	0.47331	0.58138	1	10861	1	0.3292	0.010629	0.034563	0.899604	721	3	0.3292
SYNM	4	0.22535	0.35725	0.997246	6792	1	0.37469	0.010653	0.034613	0.899604	722	3	0.37469
TMEM72	4	0.46766	0.57863	1	10804	1	0.3664	0.010657	0.034623	0.899604	723	3	0.3664
AOC1	4	0.76594	0.76776	1	14409	1	0.35209	0.010676	0.034661	0.899604	724	3	0.35209
HAUS8	3	0.98928	0.9894	1	18770	0	0.92873	0.010725	0.028665	0.869193	725	3	0.92873
NUDT12	4	0.76564	0.76748	1	14402	1	0.51011	0.010736	0.034783	0.899604	726	3	0.51011
MACC1	4	0.88843	0.8884	1	16798	0	0.23916	0.010746	0.034811	0.899604	727	3	0.23916
TMEM165	4	0.98757	0.98754	1	18735	0	0.32293	0.010755	0.034826	0.899604	728	3	0.32293
RAI2	4	0.55908	0.6254	1	11690	1	0.2092	0.010757	0.03483	0.899604	729	3	0.2092
KLHL32	4	0.26116	0.39572	1	7484	1	-0.080357	0.010809	0.034954	0.899604	730	1	-0.080357
ZNF691	4	0.94233	0.94242	1	17839	0	0.24252	0.010811	0.034959	0.899604	731	2	0.24252
ACBD7	4	0.955	0.95502	1	18101	0	0.19455	0.010824	0.034983	0.899604	732	3	0.19455
C5orf46	4	0.49238	0.59075	1	11024	1	0.23975	0.01083	0.034992	0.899604	733	2	0.23975
LOC100129924	4	0.80707	0.80702	1	15203	0	0.32028	0.010848	0.035034	0.899604	734	3	0.32028
SF1	4	0.88046	0.88045	1	16641	0	-0.045534	0.010861	0.035063	0.899604	735	1	-0.045534
GABRA1	4	0.060264	0.13957	0.972813	2709	1	0.36096	0.010875	0.035095	0.899604	736	2	0.36096
OPTC	4	0.78901	0.7892	1	14834	1	0.55522	0.010899	0.035149	0.899604	737	3	0.55522
LRRC59	4	0.7052	0.71855	1	13441	1	0.31553	0.010916	0.035185	0.899604	738	3	0.31553
COPE	3	0.98907	0.98919	1	18764	0	1.2277	0.010928	0.029208	0.870492	739	3	1.2277
XAGE5	4	0.97688	0.97708	1	18538	0	0.3659	0.010987	0.035339	0.899604	740	3	0.3659
FASN	4	0.85455	0.85444	1	16137	0	0.2788	0.010995	0.03536	0.899604	741	2	0.2788
SUMO2	3	0.44241	0.49444	1	10588	1	0.10832	0.011036	0.029465	0.875437	742	1	0.10832
ABT1	4	0.21978	0.35122	0.997	6684	1	0.044903	0.01107	0.035526	0.899604	743	1	0.044903
LETM2	4	0.84486	0.84473	1	15939	0	0.24438	0.011071	0.03553	0.899604	744	2	0.24438
ANKRD23	4	0.046596	0.11253	0.97065	2194	1	0.34579	0.011082	0.035559	0.899604	745	3	0.34579
CDYL	4	0.98706	0.98702	1	18728	0	0.3863	0.011108	0.035616	0.899604	746	3	0.3863
GLRA1	4	0.28883	0.42532	1	8004	1	0.26674	0.01111	0.035622	0.899604	747	3	0.26674
FNDC4	4	0.9365	0.93657	1	17728	0	0.067584	0.011122	0.035656	0.899604	748	1	0.067584
OC90	4	0.37164	0.51435	1	9606	1	0.26666	0.011142	0.035699	0.899604	749	2	0.26666
CCDC109B	4	0.17135	0.299	0.996566	5674	1	0.21886	0.011148	0.035712	0.899604	750	2	0.21886
SHROOM2	4	0.58572	0.64055	1	12023	1	0.41755	0.011174	0.035768	0.899604	751	3	0.41755
DAND5	4	0.46645	0.57804	1	10794	1	0.37348	0.011177	0.035772	0.899604	752	3	0.37348
GALNT2	4	0.84409	0.84397	1	15924	0	0.29563	0.011186	0.035795	0.899604	753	2	0.29563
UNC13A	4	0.46904	0.57931	1	10818	1	0.40535	0.011194	0.035817	0.899604	754	3	0.40535
HSPB11	4	0.85935	0.85918	1	16227	0	0.28203	0.011203	0.035835	0.899604	755	3	0.28203
TEX261	4	0.00023649	0.00088494	0.583003	28	1	0.34016	0.011308	0.036063	0.902956	756	2	0.34016
AMER1	4	0.10466	0.22283	0.991872	4239	3	-0.17227	0.01133	0.036118	0.903148	757	1	-0.17227
GJA1	4	0.72037	0.73014	1	13664	1	0.32642	0.011359	0.036178	0.903456	758	3	0.32642
GAR1	4	0.7393	0.745	1	13974	1	0.1125	0.011382	0.036242	0.903866	759	2	0.1125
SPIDR	4	0.9205	0.92063	1	17406	0	0.29223	0.011447	0.036388	0.90414	760	3	0.29223
NEURL4	4	0.20978	0.34045	0.997	6452	1	0.33865	0.011459	0.036417	0.90414	761	3	0.33865
SPX	4	0.98984	0.98981	1	18776	0	0.43981	0.011476	0.036449	0.90414	762	3	0.43981
BHLHA9	3	0.94093	0.94109	1	17806	0	0.28429	0.011485	0.030568	0.884796	763	2	0.28429
TMED4	4	0.87903	0.87903	1	16611	0	0.040969	0.011486	0.036473	0.90414	764	1	0.040969
GJC3	4	0.31365	0.45203	1	8473	1	0.2821	0.01155	0.036612	0.90414	765	3	0.2821
F8A1	4	0.63751	0.67205	1	12583	1	0.077058	0.011591	0.036703	0.90414	766	2	0.077058
NPR1	4	0.37086	0.5135	1	9590	1	0.33094	0.011593	0.036713	0.90414	767	2	0.33094
MAS1L	4	0.98604	0.98603	1	18705	0	0.34494	0.011606	0.036739	0.90414	768	3	0.34494
APEX1	4	0.90566	0.90568	1	17126	0	0.32607	0.011621	0.036771	0.90414	769	3	0.32607
PDHB	4	0.39422	0.53851	1	10061	2	0.10243	0.011632	0.036796	0.90414	770	2	0.10243
GZF1	4	0.81609	0.81604	1	15371	0	0.28819	0.011643	0.036821	0.90414	771	3	0.28819
ZNFX1	4	0.35538	0.49682	1	9293	1	0.071893	0.011747	0.037061	0.908197	772	1	0.071893
FAM35A	4	0.95878	0.9588	1	18169	0	0.43131	0.011775	0.037128	0.908197	773	3	0.43131
HIST1H2BC	4	0.58994	0.64299	1	12067	1	0.80063	0.011814	0.037208	0.908197	774	3	0.80063
SV2C	4	0.45163	0.57103	1	10665	1	0.16634	0.011862	0.037316	0.908197	775	2	0.16634
FLT1	4	0.98097	0.98101	1	18601	0	0.32256	0.011883	0.037358	0.908197	776	3	0.32256
ENPP6	4	0.06502	0.14891	0.975796	2889	2	-0.19531	0.011903	0.03741	0.908197	777	1	-0.19531
ARL5A	4	0.21523	0.34635	0.997	6562	1	0.44616	0.011919	0.037451	0.908197	778	3	0.44616
CSF2RA	4	0.20522	0.33549	0.997	6348	2	0.04207	0.011955	0.037535	0.908197	779	2	0.04207
TTYH2	4	0.8727	0.87265	1	16479	0	0.36578	0.011961	0.037547	0.908197	780	3	0.36578
EIF4E2	4	0.35674	0.49827	1	9316	1	0.40446	0.012033	0.03771	0.908197	781	3	0.40446
ACSL1	4	0.52809	0.6088	1	11385	1	0.42101	0.012053	0.037753	0.908197	782	2	0.42101
EYS	4	0.933	0.93311	1	17657	0	0.31201	0.012058	0.037761	0.908197	783	3	0.31201
RNF169	4	0.13893	0.26382	0.991872	5010	1	0.29608	0.012059	0.037764	0.908197	784	2	0.29608
PITX1	4	0.93406	0.93415	1	17676	0	0.44226	0.012061	0.037768	0.908197	785	3	0.44226
C4BPA	4	0.87371	0.87367	1	16502	0	0.25593	0.012067	0.037782	0.908197	786	3	0.25593
ALOX5AP	4	0.35463	0.49605	1	9276	1	0.26893	0.012113	0.037884	0.908197	787	3	0.26893
PTPN23	3	0.89185	0.89192	1	16880	0	0.7075	0.012123	0.032155	0.88999	788	2	0.7075
TMEM105	4	0.0407	0.10067	0.97065	1955	1	0.27912	0.01213	0.037926	0.908197	789	3	0.27912
GPATCH1	4	0.46326	0.57656	1	10760	1	0.072594	0.012164	0.038005	0.908197	790	1	0.072594
PARP8	4	0.39936	0.544	1	10178	1	0.27385	0.012182	0.038051	0.908197	791	3	0.27385
ZNF648	4	0.9133	0.91331	1	17269	0	0.46646	0.01222	0.038132	0.908197	792	3	0.46646
CRB1	4	0.90516	0.90516	1	17115	0	0.52291	0.012222	0.038136	0.908197	793	3	0.52291
SP2	4	0.50543	0.59721	1	11156	1	0.46823	0.012234	0.038171	0.908197	794	3	0.46823
TOX4	4	0.95105	0.95111	1	18020	0	0.5262	0.012246	0.038205	0.908197	795	3	0.5262
C10orf12	4	0.91346	0.91348	1	17272	0	0.35436	0.012313	0.038344	0.908197	796	3	0.35436
SGSM1	4	0.79551	0.7955	1	14969	1	0.0096276	0.01232	0.038358	0.908197	797	1	0.0096276
GAL	4	0.83977	0.83968	1	15848	0	0.45427	0.012327	0.038375	0.908197	798	2	0.45427
RHCE	4	0.70031	0.715	1	13368	1	0.22589	0.01234	0.03841	0.908197	799	3	0.22589
MAU2	4	0.69927	0.71423	1	13355	1	0.53488	0.012354	0.038436	0.908197	800	2	0.53488
KRTAP21-1	4	0.33113	0.47075	1	8819	2	0.18842	0.012387	0.038507	0.908197	801	2	0.18842
MAPKAPK2	4	0.73811	0.74404	1	13954	1	0.29184	0.0124	0.038535	0.908197	802	3	0.29184
ERBB2	4	0.90517	0.90517	1	17116	0	0.26104	0.012421	0.038579	0.908197	803	3	0.26104
RELN	4	0.98514	0.98513	1	18688	0	0.24059	0.012434	0.038612	0.908197	804	3	0.24059
ADRA1B	4	0.95945	0.95948	1	18186	0	0.26476	0.012434	0.038612	0.908197	805	2	0.26476
ITIH2	4	0.9851	0.98509	1	18686	0	0.34983	0.012443	0.038636	0.908197	806	3	0.34983
TRAPPC1	4	0.93945	0.93957	1	17781	0	0.97594	0.012468	0.038681	0.908197	807	3	0.97594
ZNF578	4	0.82981	0.82983	1	15650	0	-0.044107	0.012476	0.038697	0.908197	808	1	-0.044107
IRGC	4	0.92899	0.92914	1	17573	0	0.29229	0.012527	0.038804	0.909585	809	3	0.29229
C11orf95	4	0.93486	0.93497	1	17688	0	0.57293	0.01258	0.038922	0.911225	810	2	0.57293
CFHR2	4	0.90326	0.90329	1	17079	0	0.34087	0.012629	0.039033	0.912248	811	3	0.34087
EZR	4	0.98443	0.98442	1	18666	0	0.39287	0.012657	0.039095	0.912248	812	3	0.39287
SMC5	4	0.7327	0.73976	1	13861	1	1.3342	0.012673	0.03913	0.912248	813	3	1.3342
EXOC3L2	4	0.033189	0.085221	0.953625	1698	1	0.24616	0.012684	0.039158	0.912248	814	3	0.24616
TLCD2	4	0.90556	0.90558	1	17125	0	0.47784	0.012704	0.039204	0.912248	815	3	0.47784
PDLIM4	4	0.69197	0.70898	1	13257	1	0.35193	0.012746	0.039292	0.913174	816	2	0.35193
FRG2C	4	0.15456	0.28075	0.9939	5355	1	0.35547	0.012786	0.039397	0.913461	817	2	0.35547
GMPPA	4	0.25801	0.39228	1	7424	2	-0.23743	0.012788	0.039401	0.913461	818	1	-0.23743
AP1AR	4	0.30529	0.44294	1	8297	1	-0.069984	0.012892	0.039634	0.913461	819	1	-0.069984
CD5	4	0.0077819	0.026337	0.898268	553	1	0.27832	0.012934	0.039727	0.913461	820	3	0.27832
COQ6	4	0.65352	0.68248	1	12778	1	0.26188	0.012945	0.039748	0.913461	821	2	0.26188
IL3RA	4	0.48889	0.589	1	10995	1	0.29155	0.012967	0.039793	0.913461	822	3	0.29155
NCBP2	4	0.73189	0.73912	1	13846	1	0.80806	0.012978	0.039822	0.913461	823	3	0.80806
ZFX	4	0.014505	0.045355	0.926721	919	1	0.098879	0.012997	0.039861	0.913461	824	2	0.098879
CCR3	4	0.11649	0.2394	0.991872	4551	1	0.41395	0.013001	0.039877	0.913461	825	3	0.41395
RNASEL	4	0.79972	0.79967	1	15036	1	0.38031	0.01301	0.039898	0.913461	826	3	0.38031
NLRC4	4	0.06941	0.15733	0.980652	3032	2	-0.014029	0.013019	0.039917	0.913461	827	2	-0.014029
RCOR2	4	0.96435	0.96441	1	18280	0	0.36494	0.013032	0.03994	0.913461	828	3	0.36494
SCCPDH	3	0.98697	0.98711	1	18723	0	0.25106	0.013035	0.034418	0.899604	829	3	0.25106
VPS8	4	0.5747	0.63408	1	11873	1	0.64514	0.013064	0.040006	0.913461	830	3	0.64514
MEIOB	4	0.98441	0.9844	1	18664	0	0.2701	0.01308	0.040038	0.913461	831	3	0.2701
RHBDL1	4	0.95597	0.95602	1	18118	0	0.38739	0.013095	0.040069	0.913461	832	3	0.38739
KCTD5	4	0.66401	0.68942	1	12912	1	0.13555	0.013153	0.04019	0.915122	833	2	0.13555
APOC3	4	0.67455	0.69667	1	13039	1	0.23417	0.013189	0.040274	0.915777	834	3	0.23417
ARHGEF7	4	0.84554	0.8454	1	15949	0	0.34506	0.013227	0.040362	0.915777	835	3	0.34506
JADE3	4	0.76489	0.76683	1	14390	1	0.28247	0.013292	0.040507	0.916093	836	3	0.28247
ALPPL2	4	0.49418	0.59164	1	11042	1	0.23757	0.013308	0.040544	0.916093	837	3	0.23757
FAM104A	4	0.13229	0.25653	0.991872	4869	1	0.020063	0.013309	0.040546	0.916093	838	1	0.020063
SLC4A8	4	0.088924	0.19431	0.986491	3715	2	0.13131	0.013323	0.040574	0.916093	839	2	0.13131
SPRR2E	4	0.74062	0.74615	1	13996	1	0.23562	0.013361	0.04066	0.916093	840	2	0.23562
KIAA1614	4	0.98755	0.98753	1	18734	0	0.42184	0.013363	0.040664	0.916093	841	3	0.42184
SORCS3	4	0.034021	0.086954	0.959024	1721	2	-0.23067	0.013413	0.040779	0.91721	842	1	-0.23067
CD37	4	0.97603	0.97623	1	18519	0	0.43288	0.013427	0.04081	0.91721	843	3	0.43288
POLG	4	0.97944	0.97957	1	18577	0	0.33354	0.013465	0.040885	0.917819	844	3	0.33354
NR3C2	4	0.5719	0.63252	1	11850	1	0.017268	0.013517	0.04101	0.918131	845	1	0.017268
ULK3	4	0.39565	0.54007	1	10094	1	0.26476	0.013526	0.041026	0.918131	846	2	0.26476
STK38L	4	0.38152	0.52487	1	9785	1	0.30229	0.013533	0.041043	0.918131	847	2	0.30229
TTC23L	4	0.71684	0.72733	1	13608	1	0.14689	0.013569	0.041128	0.918288	848	2	0.14689
MBD3L1	4	0.83174	0.83178	1	15685	0	0.21935	0.013575	0.041146	0.918288	849	2	0.21935
C2orf16	4	0.0091142	0.030618	0.925367	623	2	-0.25836	0.013621	0.041248	0.919002	850	2	-0.25836
CCDC182	4	0.39263	0.53679	1	10021	2	0.27104	0.013652	0.041318	0.919002	851	2	0.27104
FAM122B	4	0.30494	0.44259	1	8292	2	-0.05939	0.013673	0.041366	0.919002	852	1	-0.05939
SCAF1	4	0.98578	0.98575	1	18700	0	0.39667	0.013675	0.04137	0.919002	853	3	0.39667
PSMD10	4	0.64613	0.67766	1	12696	1	0.012614	0.013725	0.041491	0.920614	854	1	0.012614
SZT2	4	0.87234	0.87229	1	16471	0	0.25005	0.0138	0.041661	0.922008	855	2	0.25005
SREBF1	4	0.49807	0.59359	1	11072	1	0.28784	0.013816	0.041703	0.922008	856	3	0.28784
ZNF629	4	0.41579	0.55473	1	10370	1	0.31417	0.013835	0.041745	0.922008	857	3	0.31417
MCF2L2	4	0.12916	0.25317	0.991872	4801	1	0.33666	0.013866	0.04181	0.922008	858	3	0.33666
APOM	4	0.8082	0.80811	1	15223	0	0.22962	0.01387	0.041818	0.922008	859	2	0.22962
UBXN2B	4	0.19157	0.32081	0.997	6091	2	-0.060438	0.013881	0.041844	0.922008	860	1	-0.060438
OLFML2B	4	0.49842	0.59378	1	11083	1	0.10447	0.013906	0.041895	0.922075	861	2	0.10447
STC2	4	0.98698	0.98693	1	18724	0	0.45593	0.013949	0.042	0.922156	862	3	0.45593
TRMT13	4	0.93935	0.93946	1	17779	0	0.35612	0.013963	0.042034	0.922156	863	2	0.35612
ACKR1	4	0.19577	0.32528	0.997	6163	1	0.017744	0.013985	0.042084	0.922156	864	1	0.017744
OR56A4	4	0.036771	0.09261	0.968901	1820	2	0.12433	0.013991	0.042098	0.922156	865	2	0.12433
SENP8	4	0.97691	0.97711	1	18539	0	0.25681	0.014037	0.042196	0.922156	866	3	0.25681
C9orf129	4	0.97555	0.97574	1	18509	0	0.3296	0.014045	0.042221	0.922156	867	3	0.3296
ROPN1B	4	0.9789	0.97903	1	18566	0	0.3258	0.014052	0.042237	0.922156	868	3	0.3258
SSFA2	4	0.040903	0.10106	0.97065	1961	1	0.38839	0.014089	0.042324	0.923002	869	3	0.38839
CMAS	4	0.95028	0.95035	1	17998	0	0.35093	0.014126	0.042415	0.923608	870	2	0.35093
CAND1	4	0.94613	0.94618	1	17909	0	0.45804	0.014184	0.042542	0.923608	871	3	0.45804
NRG2	4	0.85248	0.85235	1	16086	0	0.30358	0.014198	0.042573	0.923608	872	2	0.30358
C6orf10	4	0.21119	0.34197	0.997	6480	1	0.17485	0.014245	0.042686	0.923608	873	2	0.17485
PUS3	4	0.78154	0.78207	1	14700	1	0.29645	0.014253	0.042707	0.923608	874	3	0.29645
SKIV2L2	2	0.98571	0.98576	1	18697	0	1.4578	0.014292	0.02679	0.863047	875	2	1.4578
KLK8	4	0.36993	0.5125	1	9576	1	0.1447	0.014305	0.042826	0.923608	876	2	0.1447
GZMB	4	0.62246	0.66257	1	12422	1	0.44322	0.014349	0.042919	0.923608	877	3	0.44322
LMNB2	4	0.15637	0.28272	0.99619	5382	2	0.19392	0.01437	0.042966	0.923608	878	2	0.19392
HRH3	4	0.98357	0.98355	1	18649	0	0.33505	0.014378	0.042987	0.923608	879	3	0.33505
FUT8	4	0.95637	0.9564	1	18123	0	0.42152	0.014388	0.043015	0.923608	880	3	0.42152
MPHOSPH9	4	0.48347	0.58638	1	10954	1	0.14368	0.014401	0.043048	0.923608	881	2	0.14368
PAGE4	4	0.6241	0.66362	1	12437	1	0.27649	0.014442	0.043141	0.923608	882	3	0.27649
TUBG2	4	0.91373	0.91374	1	17277	0	0.1128	0.014453	0.043163	0.923608	883	1	0.1128
CXADR	4	0.23529	0.36791	0.997529	6997	2	0.0082536	0.014505	0.043282	0.923608	884	2	0.0082536
NES	4	0.55956	0.62568	1	11700	1	0.34158	0.014522	0.043318	0.923608	885	2	0.34158
PTP4A3	4	0.98759	0.98756	1	18737	0	0.3501	0.014544	0.043382	0.923608	886	3	0.3501
MRGBP	4	0.87969	0.87971	1	16627	0	0.082197	0.014557	0.043403	0.923608	887	2	0.082197
SESN1	4	0.86104	0.86088	1	16263	0	0.31004	0.014565	0.043418	0.923608	888	3	0.31004
KIF2C	4	0.20541	0.33569	0.997	6355	1	0.4087	0.014572	0.043431	0.923608	889	3	0.4087
C22orf15	4	0.046038	0.11144	0.97065	2173	2	0.018687	0.01458	0.043447	0.923608	890	2	0.018687
HPRT1	4	0.93714	0.93725	1	17735	0	0.36102	0.014601	0.04349	0.923608	891	3	0.36102
TMED10	4	0.84973	0.84963	1	16030	0	0.17385	0.014609	0.043504	0.923608	892	2	0.17385
EDC4	4	0.7324	0.73953	1	13853	1	0.57869	0.014633	0.043564	0.923608	893	3	0.57869
ZNF2	4	0.85452	0.8544	1	16136	0	0.53138	0.014644	0.043594	0.923608	894	3	0.53138
CD300A	4	0.68303	0.70266	1	13144	1	0.38291	0.014652	0.043608	0.923608	895	2	0.38291
HSCB	4	0.20653	0.33693	0.997	6383	2	0.27928	0.014687	0.043703	0.923908	896	2	0.27928
CAPN14	4	0.31347	0.45184	1	8469	1	0.31685	0.014696	0.043719	0.923908	897	2	0.31685
TSEN15	4	0.98441	0.9844	1	18665	0	0.50193	0.014817	0.043998	0.928773	898	3	0.50193
ZSWIM1	4	0.11927	0.24245	0.991872	4603	1	0.36424	0.014878	0.044157	0.930087	899	3	0.36424
GRIN1	4	0.52659	0.60805	1	11369	1	0.26037	0.014878	0.044158	0.930087	900	2	0.26037
STAG2	4	0.666	0.69081	1	12929	1	0.44991	0.014929	0.044283	0.931702	901	3	0.44991
TSPAN11	4	0.99027	0.99026	1	18786	0	0.4608	0.014992	0.044432	0.932373	902	3	0.4608
SLC37A4	4	0.9708	0.97089	1	18410	0	0.15493	0.015025	0.044504	0.932373	903	2	0.15493
MYO1C	4	0.86188	0.86176	1	16282	0	0.33842	0.015027	0.044507	0.932373	904	3	0.33842
PEF1	4	0.69916	0.71416	1	13353	1	0.034335	0.015077	0.044622	0.932373	905	2	0.034335
MPV17L	4	0.84827	0.84814	1	16010	0	0.23752	0.015086	0.044637	0.932373	906	3	0.23752
CNIH4	4	0.48968	0.58938	1	11004	1	0.24999	0.015117	0.044715	0.932373	907	3	0.24999
NEUROD4	4	0.036669	0.092408	0.968901	1816	1	0.20705	0.015129	0.044748	0.932373	908	3	0.20705
MAGEA11	4	0.63916	0.67311	1	12600	1	0.02977	0.015181	0.044842	0.932373	909	1	0.02977
TFAP4	4	0.85279	0.85267	1	16096	0	0.34859	0.015201	0.044882	0.932373	910	3	0.34859
CDC20	3	0.9848	0.98497	1	18677	0	0.93527	0.015204	0.039834	0.913461	911	3	0.93527
ZNF684	4	0.65899	0.68612	1	12840	1	0.1386	0.015261	0.045006	0.932373	912	2	0.1386
FAM92B	4	0.98852	0.98853	1	18756	0	0.43186	0.015261	0.045007	0.932373	913	3	0.43186
RPE65	4	0.97483	0.97499	1	18493	0	0.46923	0.015275	0.045037	0.932373	914	3	0.46923
NECAB1	4	0.38991	0.53384	1	9958	1	0.21854	0.015283	0.045056	0.932373	915	2	0.21854
STRA8	4	0.97172	0.97184	1	18424	0	0.28034	0.015293	0.045074	0.932373	916	3	0.28034
HIST4H4	4	0.33391	0.4737	1	8867	1	0.42835	0.015327	0.045159	0.932373	917	3	0.42835
MRPL42	4	0.3531	0.49441	1	9250	2	-0.16973	0.015336	0.045179	0.932373	918	2	-0.16973
PHF2	4	0.98874	0.98874	1	18760	0	0.24681	0.01536	0.045237	0.932373	919	3	0.24681
CAGE1	4	0.15252	0.2785	0.9939	5312	1	0.2389	0.015374	0.045261	0.932373	920	3	0.2389
C9orf24	4	0.98105	0.98108	1	18603	0	0.40205	0.015381	0.045274	0.932373	921	3	0.40205
PMPCB	4	0.22149	0.35307	0.997053	6722	2	-0.26238	0.015388	0.045291	0.932373	922	1	-0.26238
RABGGTB	3	0.98459	0.98476	1	18673	0	0.8152	0.015407	0.040333	0.915777	923	3	0.8152
PEG3	4	0.69562	0.71158	1	13302	1	0.25944	0.015453	0.045447	0.933921	924	2	0.25944
NBPF4	4	0.95136	0.95143	1	18027	0	0.21624	0.015498	0.045556	0.933921	925	2	0.21624
ZNF165	4	0.81275	0.81271	1	15308	0	0.45315	0.015533	0.045634	0.933921	926	3	0.45315
RIOK1	4	0.082757	0.18276	0.984385	3493	2	-0.35661	0.015544	0.045658	0.933921	927	1	-0.35661
C3orf17	4	0.823	0.82299	1	15515	0	0.33039	0.015573	0.045718	0.933921	928	2	0.33039
ITGA7	4	0.97809	0.97825	1	18552	0	0.27687	0.015576	0.045721	0.933921	929	3	0.27687
OR2K2	4	0.36079	0.50266	1	9394	2	-0.11293	0.015596	0.045775	0.933921	930	1	-0.11293
OR4Q3	4	0.88807	0.88804	1	16788	0	0.40046	0.015601	0.045783	0.933921	931	3	0.40046
VSTM2L	4	0.15928	0.28593	0.996566	5433	1	0.26472	0.015611	0.045806	0.933921	932	3	0.26472
PLLP	4	0.21903	0.35044	0.997	6656	1	0.18758	0.015648	0.045897	0.934192	933	2	0.18758
SNRPN	4	0.58043	0.63741	1	11950	1	0.18169	0.015661	0.045926	0.934192	934	3	0.18169
SUCLG2	4	0.37637	0.51939	1	9696	1	0.1936	0.015692	0.045999	0.934192	935	2	0.1936
COX8A	4	0.19255	0.32185	0.997	6111	2	-0.19538	0.0157	0.046015	0.934192	936	1	-0.19538
KCNK17	4	0.036414	0.091873	0.968083	1808	3	-0.35806	0.015752	0.046135	0.935049	937	1	-0.35806
SS18	4	0.91258	0.91258	1	17252	0	0.21809	0.015804	0.046257	0.935049	938	2	0.21809
TEAD1	4	0.45627	0.57323	1	10702	1	0.32898	0.01585	0.046362	0.935049	939	3	0.32898
SPRED3	4	0.86974	0.86964	1	16419	0	0.035346	0.015856	0.046376	0.935049	940	1	0.035346
SUSD3	4	0.0061088	0.021004	0.866756	453	2	0.055797	0.015873	0.046422	0.935049	941	2	0.055797
IL12B	4	0.78703	0.78729	1	14796	1	0.18688	0.01588	0.046438	0.935049	942	2	0.18688
DNAJC5B	4	0.29934	0.43656	1	8181	2	0.18098	0.015908	0.046498	0.935049	943	2	0.18098
NKX2-8	4	0.3932	0.53741	1	10031	1	0.082585	0.015941	0.046573	0.935049	944	2	0.082585
ALKBH2	4	0.84068	0.84054	1	15868	0	0.21688	0.015952	0.046611	0.935049	945	3	0.21688
OR2D3	4	0.20669	0.33712	0.997	6385	1	0.20105	0.015963	0.04664	0.935049	946	2	0.20105
NIPA2	4	0.46573	0.57769	1	10786	1	0.17035	0.015978	0.046676	0.935049	947	2	0.17035
ANGPTL7	4	0.97172	0.97185	1	18425	0	0.3577	0.015989	0.046696	0.935049	948	3	0.3577
ANXA4	4	0.14715	0.27272	0.991872	5191	2	-0.10353	0.016012	0.046739	0.935049	949	1	-0.10353
ZBED4	4	0.16732	0.29459	0.996566	5595	1	0.21862	0.016016	0.046754	0.935049	950	2	0.21862
SBK1	4	0.2388	0.37164	0.997529	7071	1	0.022316	0.016064	0.046863	0.935049	951	1	0.022316
FBXL12	4	0.64521	0.67704	1	12681	1	0.33006	0.016077	0.04689	0.935049	952	2	0.33006
SLC25A10	4	0.37249	0.51524	1	9623	1	0.27058	0.016127	0.046995	0.93618	953	3	0.27058
TBC1D7	4	0.30669	0.44443	1	8331	1	0.1357	0.016167	0.047087	0.937041	954	2	0.1357
PLEKHB2	4	0.98896	0.98894	1	18763	0	0.25597	0.01624	0.047243	0.937444	955	3	0.25597
LDB2	4	0.98286	0.98288	1	18637	0	0.27559	0.016251	0.047275	0.937444	956	3	0.27559
ZZEF1	4	0.83076	0.8308	1	15667	0	0.29314	0.016313	0.047425	0.937444	957	3	0.29314
SOHLH1	4	0.30626	0.44398	1	8318	2	0.1791	0.016343	0.047491	0.937444	958	2	0.1791
TRPV4	4	0.52491	0.60719	1	11355	1	0.35756	0.016346	0.047495	0.937444	959	3	0.35756
AMY2A	4	0.1164	0.2393	0.991872	4549	2	0.15661	0.016358	0.047526	0.937444	960	2	0.15661
MFN2	3	0.98361	0.98375	1	18651	0	1.2583	0.016392	0.042776	0.923608	961	3	1.2583
STRA13	4	0.41978	0.55647	1	10402	1	0.2863	0.016427	0.047674	0.937444	962	3	0.2863
CEP131	4	0.30003	0.43733	1	8197	1	0.29877	0.016449	0.047724	0.937444	963	3	0.29877
ARHGDIG	4	0.87156	0.87152	1	16450	0	0.27337	0.01645	0.047727	0.937444	964	2	0.27337
TMEM33	4	0.90819	0.90819	1	17171	0	0.30376	0.016458	0.047746	0.937444	965	3	0.30376
CD27	4	0.31194	0.45018	1	8432	1	0.39386	0.016479	0.047788	0.937444	966	3	0.39386
SMIM17	4	0.49105	0.59007	1	11016	1	0.35937	0.016504	0.047841	0.937444	967	3	0.35937
HDAC2	4	0.83423	0.83422	1	15737	0	0.56361	0.016552	0.047962	0.937444	968	3	0.56361
SOCS7	4	0.98112	0.98114	1	18605	0	0.31342	0.016567	0.047989	0.937444	969	3	0.31342
IL3	4	0.56606	0.62927	1	11775	1	0.28677	0.016574	0.048007	0.937444	970	3	0.28677
FMO1	4	0.50017	0.59466	1	11101	1	0.30532	0.016581	0.048023	0.937444	971	2	0.30532
GPRIN2	4	0.89592	0.89588	1	16957	0	0.26598	0.016588	0.04804	0.937444	972	2	0.26598
SLC7A13	4	0.68582	0.7046	1	13182	1	-0.008593	0.016635	0.048142	0.937595	973	2	-0.008593
ZDHHC5	4	0.98935	0.98934	1	18771	0	0.35356	0.016667	0.048204	0.937595	974	3	0.35356
NBR1	4	0.14658	0.27207	0.991872	5178	2	-0.16865	0.016686	0.048242	0.937595	975	1	-0.16865
CLEC2D	4	0.95356	0.9536	1	18064	0	0.28898	0.016758	0.048401	0.937595	976	3	0.28898
KLF13	4	0.3255	0.46464	1	8706	1	0.47083	0.01679	0.048466	0.937595	977	3	0.47083
PARG	4	0.73662	0.74281	1	13928	1	0.41717	0.01679	0.048467	0.937595	978	2	0.41717
SNRPB2	4	0.11798	0.24103	0.991872	4577	1	0.35201	0.016801	0.048488	0.937595	979	3	0.35201
NKAP	4	0.96188	0.96191	1	18229	0	0.55961	0.016812	0.048511	0.937595	980	2	0.55961
TNFRSF1A	4	0.52911	0.60935	1	11391	1	0.29909	0.016842	0.04858	0.937595	981	3	0.29909
AAAS	4	0.3146	0.45305	1	8490	1	0.36272	0.016874	0.048651	0.937595	982	2	0.36272
IFT81	4	0.067815	0.15428	0.980196	2973	1	0.31873	0.016882	0.048661	0.937595	983	2	0.31873
MIB1	4	0.98959	0.98956	1	18775	0	0.44451	0.016887	0.048672	0.937595	984	3	0.44451
VAMP2	4	0.67089	0.69412	1	12991	1	0.52902	0.016894	0.048686	0.937595	985	3	0.52902
UBE2O	4	0.09893	0.21258	0.989577	4063	1	0.34481	0.016932	0.048776	0.938386	986	3	0.34481
AGO2	4	0.83469	0.83469	1	15744	0	0.74828	0.016952	0.04883	0.938487	987	3	0.74828
MTERF4	4	0.98041	0.98048	1	18592	0	0.97837	0.017018	0.048988	0.939786	988	2	0.97837
CSNK1A1L	4	0.4836	0.58644	1	10956	1	0.34394	0.017022	0.049	0.939786	989	3	0.34394
CBX4	4	0.50596	0.59748	1	11161	1	0.13206	0.01705	0.049053	0.939786	990	2	0.13206
HIST1H1E	4	0.9556	0.95565	1	18111	0	0.2837	0.017068	0.049095	0.939786	991	3	0.2837
KCND1	4	0.88366	0.88363	1	16704	0	0.25733	0.017138	0.049252	0.941279	992	2	0.25733
SHD	4	0.69771	0.71309	1	13335	1	0.19452	0.017153	0.049279	0.941279	993	2	0.19452
FSHB	4	0.25574	0.3898	1	7382	1	0.11609	0.017205	0.049409	0.941279	994	3	0.11609
CHPF	4	0.093815	0.20335	0.986491	3884	1	0.25436	0.017253	0.049508	0.941279	995	3	0.25436
CDRT15L2	4	0.85636	0.85627	1	16173	0	0.49295	0.017257	0.049518	0.941279	996	2	0.49295
SRP19	4	0.89101	0.89098	1	16864	0	0.61389	0.017301	0.049619	0.942272	997	3	0.61389
ASCC3	4	0.87286	0.87284	1	16482	0	0.29533	0.017413	0.049866	0.946016	998	2	0.29533
MPI	4	0.95156	0.95162	1	18031	0	0.45633	0.017486	0.050016	0.947858	999	3	0.45633
HNRNPL	2	0.56865	0.5688	1	11812	0	0.37782	0.017516	0.032497	0.88999	1000	1	0.37782
DDA1	4	0.43483	0.56327	1	10534	1	0.55725	0.017566	0.050201	0.947858	1001	3	0.55725
MICB	4	0.8944	0.89437	1	16922	0	0.27327	0.01757	0.050206	0.947858	1002	3	0.27327
TSSK6	4	0.66382	0.68929	1	12908	1	0.17862	0.017586	0.050238	0.947858	1003	2	0.17862
POP1	4	0.80649	0.80644	1	15186	0	-0.054223	0.01762	0.050301	0.947858	1004	1	-0.054223
PLSCR4	4	0.87536	0.87535	1	16533	0	0.40872	0.017647	0.050353	0.947858	1005	3	0.40872
LENEP	4	0.043446	0.10622	0.97065	2065	3	-0.56039	0.017672	0.050404	0.947858	1006	1	-0.56039
EVI5	4	0.53027	0.60992	1	11404	1	0.31214	0.017674	0.050405	0.947858	1007	3	0.31214
BTBD6	4	0.42299	0.55794	1	10432	1	0.34644	0.017705	0.050474	0.947858	1008	3	0.34644
NARR	4	0.30612	0.44384	1	8313	2	0.039528	0.017724	0.050512	0.947858	1009	2	0.039528
ZNF784	4	0.067217	0.15315	0.980196	2953	1	0.075519	0.017776	0.05063	0.947858	1010	2	0.075519
PLB1	4	0.96829	0.96836	1	18357	0	0.45622	0.017797	0.050675	0.947858	1011	3	0.45622
IRF2BP1	4	0.87621	0.87618	1	16554	0	0.59054	0.017824	0.050734	0.947858	1012	3	0.59054
TMEM14B	4	0.92878	0.92894	1	17570	0	0.1604	0.017828	0.050741	0.947858	1013	2	0.1604
DNAJB1	4	0.53671	0.61331	1	11471	1	0.53609	0.017863	0.050811	0.947858	1014	3	0.53609
MPZL3	4	0.87318	0.87315	1	16490	0	0.3513	0.01791	0.05091	0.947858	1015	3	0.3513
DNASE1	4	0.84881	0.8487	1	16015	0	0.38658	0.017914	0.050922	0.947858	1016	3	0.38658
CDH1	4	0.72161	0.73106	1	13690	1	0.16799	0.017927	0.05095	0.947858	1017	2	0.16799
GSX2	4	0.19113	0.32035	0.997	6084	2	-0.13832	0.017931	0.050955	0.947858	1018	1	-0.13832
FAM169B	4	0.7899	0.79004	1	14851	1	0.16304	0.017983	0.051071	0.949084	1019	2	0.16304
KCNJ12	4	0.0019169	0.0068347	0.807949	160	3	-0.29535	0.018035	0.051182	0.950221	1020	1	-0.29535
MYRF	3	0.98196	0.98212	1	18619	0	0.30448	0.018045	0.046845	0.935049	1021	3	0.30448
GORASP2	4	0.98255	0.98257	1	18631	0	0.16103	0.018085	0.051298	0.950586	1022	3	0.16103
SIX3	4	0.96015	0.96018	1	18197	0	0.14422	0.018087	0.051301	0.950586	1023	2	0.14422
KCNIP4	4	0.68272	0.70242	1	13141	1	0.1238	0.018139	0.05142	0.951284	1024	2	0.1238
SNTG1	4	0.044037	0.10746	0.97065	2093	2	-0.24721	0.018191	0.051537	0.951284	1025	1	-0.24721
SPG7	4	0.50602	0.59752	1	11163	1	0.22254	0.018191	0.051538	0.951284	1026	2	0.22254
ACY3	4	0.98004	0.98012	1	18586	0	0.34578	0.018191	0.051538	0.951284	1027	3	0.34578
GBF1	4	0.75753	0.76049	1	14270	1	0.45451	0.018242	0.051645	0.952344	1028	2	0.45451
DNAH5	4	0.91776	0.91779	1	17351	0	0.10464	0.018294	0.05176	0.953207	1029	2	0.10464
DDX3X	2	0.85974	0.85956	1	16237	0	0.90731	0.018297	0.033895	0.896856	1030	1	0.90731
USP51	4	0.12698	0.25077	0.991872	4764	1	0.054016	0.018346	0.051875	0.953207	1031	1	0.054016
ATP5J2	3	0.2323	0.35196	0.997	6941	1	-0.093279	0.018393	0.047658	0.937444	1032	1	-0.093279
PAXIP1	4	0.54217	0.61622	1	11527	1	0.16735	0.018398	0.051999	0.953207	1033	2	0.16735
RPRD2	4	0.91356	0.91358	1	17274	0	0.33962	0.018412	0.052036	0.953207	1034	3	0.33962
TTBK1	4	0.96916	0.9692	1	18375	0	0.4529	0.018416	0.052047	0.953207	1035	3	0.4529
SLC16A5	4	0.93424	0.93434	1	17679	0	0.3003	0.018432	0.052084	0.953207	1036	3	0.3003
RANBP9	4	0.82296	0.82295	1	15514	0	0.41171	0.01844	0.052094	0.953207	1037	3	0.41171
MTMR6	4	0.92022	0.92034	1	17401	0	0.40079	0.018465	0.052152	0.953207	1038	2	0.40079
DGUOK	4	0.9055	0.90553	1	17123	0	0.41618	0.018479	0.052188	0.953207	1039	3	0.41618
ARHGAP6	4	0.59862	0.64812	1	12159	1	0.24095	0.018481	0.052191	0.953207	1040	3	0.24095
CSF1R	4	0.62937	0.66693	1	12492	1	0.41718	0.018539	0.052318	0.954307	1041	3	0.41718
RRP7A	4	0.26353	0.39828	1	7536	2	0.11199	0.018553	0.052351	0.954307	1042	2	0.11199
ENDOV	4	0.88141	0.88138	1	16664	0	0.0066269	0.018605	0.052459	0.95537	1043	1	0.0066269
CHI3L1	4	0.88064	0.88063	1	16649	0	0.26227	0.018657	0.052577	0.955587	1044	3	0.26227
KRTAP16-1	4	0.54655	0.61859	1	11565	1	0.40967	0.018675	0.052616	0.955587	1045	3	0.40967
RSPH10B	4	0.92077	0.9209	1	17410	0	0.31721	0.01869	0.052644	0.955587	1046	3	0.31721
AHCTF1	4	0.41915	0.55618	1	10400	1	0.39184	0.018761	0.05278	0.956288	1047	2	0.39184
GPR1	4	0.81109	0.81103	1	15270	0	0.17251	0.018789	0.052831	0.956288	1048	2	0.17251
SRA1	4	0.98169	0.98172	1	18612	0	0.34775	0.01883	0.052916	0.956288	1049	3	0.34775
SLC15A1	4	0.1115	0.23404	0.991872	4452	2	-0.10265	0.018864	0.052986	0.956288	1050	1	-0.10265
NAB1	4	0.95413	0.95416	1	18080	0	0.33565	0.018895	0.053056	0.956288	1051	3	0.33565
RNF151	4	0.61931	0.66066	1	12390	1	0.35646	0.018898	0.053062	0.956288	1052	3	0.35646
SI	4	0.50129	0.5952	1	11111	1	0.21241	0.018916	0.053102	0.956288	1053	2	0.21241
RPL13A	4	0.20091	0.33082	0.997	6260	1	0.74527	0.018936	0.053148	0.956288	1054	3	0.74527
BSG	4	0.81424	0.81418	1	15335	0	0.20167	0.018968	0.053216	0.956288	1055	2	0.20167
TCEAL4	4	0.19626	0.32581	0.997	6170	1	0.39552	0.018985	0.053255	0.956288	1056	3	0.39552
ELAVL2	4	0.97751	0.9777	1	18545	0	0.33264	0.018987	0.053261	0.956288	1057	3	0.33264
TCL1A	4	0.17854	0.30672	0.996566	5816	2	0.098637	0.019009	0.053315	0.956366	1058	2	0.098637
SLC7A9	3	0.98093	0.98106	1	18600	0	0.2012	0.019073	0.049342	0.941279	1059	3	0.2012
NHLH2	4	0.92016	0.92028	1	17399	0	0.37495	0.019092	0.053503	0.956643	1060	3	0.37495
PLA2G2C	4	0.74138	0.74677	1	14009	1	0.40655	0.019096	0.053511	0.956643	1061	3	0.40655
MEIS1	4	0.37529	0.51828	1	9674	2	0.2483	0.019141	0.053606	0.956643	1062	2	0.2483
KRTAP4-5	3	0.98086	0.98099	1	18599	0	0.33176	0.019143	0.049506	0.941279	1063	3	0.33176
OXT	4	0.030972	0.080639	0.951149	1608	2	-0.0013232	0.019223	0.053793	0.956643	1064	2	-0.0013232
MAPK14	4	0.98924	0.98923	1	18769	0	0.27265	0.019226	0.0538	0.956643	1065	3	0.27265
RPL36A-HNRNPH2	4	0.071427	0.16125	0.982907	3095	2	-0.26715	0.019227	0.053802	0.956643	1066	1	-0.26715
KIAA1683	4	0.90853	0.90853	1	17179	0	0.42991	0.019264	0.053887	0.956643	1067	3	0.42991
ACTR3B	4	0.1362	0.26086	0.991872	4955	2	0.067651	0.019272	0.053912	0.956643	1068	2	0.067651
ZSWIM4	4	0.34612	0.48691	1	9101	2	-0.072389	0.019279	0.053929	0.956643	1069	1	-0.072389
SSR3	4	0.98415	0.98414	1	18658	0	0.13578	0.019331	0.05407	0.956643	1070	3	0.13578
RNF167	4	0.9275	0.92766	1	17540	0	0.29176	0.019338	0.054083	0.956643	1071	2	0.29176
UBN2	4	0.88351	0.88348	1	16698	0	0.30836	0.019348	0.05411	0.956643	1072	3	0.30836
RHOXF2B	4	0.10538	0.22412	0.991872	4267	1	-0.05234	0.019382	0.054181	0.956643	1073	1	-0.05234
KRT33B	4	0.72409	0.73302	1	13729	1	0.42068	0.019405	0.054231	0.956643	1074	3	0.42068
PCDHGA3	4	0.047735	0.11483	0.97172	2240	2	0.062106	0.019421	0.054263	0.956643	1075	2	0.062106
ENPP7	4	0.93715	0.93726	1	17736	0	0.20176	0.019429	0.054281	0.956643	1076	2	0.20176
MEGF11	4	0.85177	0.85162	1	16067	0	0.3138	0.01945	0.054327	0.956643	1077	3	0.3138
RPL19	2	0.85824	0.85805	1	16201	0	1.2252	0.019469	0.036012	0.902855	1078	1	1.2252
TNFAIP8L1	4	0.93076	0.93089	1	17614	0	0.41803	0.019503	0.054438	0.956643	1079	3	0.41803
PUS1	4	0.97532	0.9755	1	18502	0	0.89707	0.019507	0.054444	0.956643	1080	3	0.89707
FAM160B2	4	0.21431	0.34536	0.997	6552	2	-0.1237	0.019538	0.054502	0.956643	1081	1	-0.1237
MAMLD1	4	0.37386	0.51675	1	9656	1	0.18168	0.019561	0.054552	0.956643	1082	2	0.18168
TMSB4X	4	0.92578	0.92594	1	17508	0	0.26425	0.019577	0.054586	0.956643	1083	3	0.26425
ANAPC15	4	0.17408	0.30194	0.996566	5724	1	0.23616	0.01959	0.05461	0.956643	1084	2	0.23616
ERO1L	4	0.825	0.82497	1	15551	0	0.38278	0.019596	0.054623	0.956643	1085	3	0.38278
ACOT1	4	0.010288	0.034322	0.925367	696	1	0.23789	0.019603	0.054632	0.956643	1086	2	0.23789
SLC18A1	4	0.83346	0.83344	1	15723	0	0.064956	0.019641	0.054728	0.95686	1087	2	0.064956
MYH11	3	0.98028	0.98038	1	18590	0	0.67236	0.019721	0.050865	0.947858	1088	3	0.67236
POC1B-GALNT4	4	0.76188	0.76423	1	14345	1	0.23574	0.01973	0.054934	0.95686	1089	3	0.23574
ARGLU1	4	0.65673	0.68464	1	12811	1	0.45856	0.019732	0.054937	0.95686	1090	2	0.45856
ITPRIP	4	0.35169	0.4929	1	9226	2	0.10168	0.019753	0.054982	0.95686	1091	2	0.10168
CSDE1	4	0.94882	0.94887	1	17966	0	0.41832	0.019755	0.054985	0.95686	1092	3	0.41832
AQP10	4	0.83244	0.83244	1	15700	0	0.41482	0.019783	0.055055	0.95686	1093	3	0.41482
C1orf137	4	0.29329	0.43008	1	8071	1	0.27591	0.019794	0.055079	0.95686	1094	2	0.27591
DDR2	4	0.76884	0.7704	1	14456	1	0.29584	0.019812	0.05512	0.95686	1095	3	0.29584
SLC25A23	4	0.6729	0.69553	1	13022	1	0.20583	0.019861	0.055232	0.95686	1096	2	0.20583
PCDHGB4	4	0.68227	0.7021	1	13139	1	0.19638	0.019879	0.055285	0.95686	1097	3	0.19638
ADCK3	4	0.51298	0.60101	1	11235	1	0.0063279	0.0199	0.055331	0.95686	1098	1	0.0063279
NCOR2	4	0.57357	0.63343	1	11863	1	0.38027	0.019927	0.055391	0.95686	1099	3	0.38027
NEK10	4	0.83818	0.8381	1	15813	0	0.2332	0.019949	0.055446	0.95686	1100	3	0.2332
ERI2	4	0.24465	0.37786	0.999757	7179	1	0.25226	0.019952	0.055452	0.95686	1101	2	0.25226
RAVER1	4	0.96174	0.96177	1	18227	0	0.2436	0.020012	0.055574	0.95686	1102	3	0.2436
DHRS9	4	0.4522	0.5713	1	10671	1	0.19193	0.020016	0.055585	0.95686	1103	3	0.19193
TBC1D15	4	0.15734	0.28382	0.99619	5400	2	-0.15888	0.020107	0.055793	0.95686	1104	1	-0.15888
CCDC79	4	0.90856	0.90856	1	17180	0	0.23047	0.020137	0.055862	0.95686	1105	3	0.23047
PRRC2B	4	0.086471	0.18972	0.984956	3628	1	0.27769	0.02015	0.055885	0.95686	1106	3	0.27769
TMEM161A	4	0.97158	0.97171	1	18421	0	0.26523	0.020154	0.055892	0.95686	1107	2	0.26523
KLK6	4	0.71521	0.72606	1	13586	1	0.29758	0.020159	0.055903	0.95686	1108	3	0.29758
ATP6V0E2	4	0.90162	0.90164	1	17053	0	0.4241	0.020213	0.056021	0.95686	1109	3	0.4241
SIPA1L1	4	0.92853	0.9287	1	17564	0	0.31908	0.020247	0.056096	0.95686	1110	2	0.31908
TSC2	4	0.35986	0.50163	1	9380	2	-0.10991	0.020263	0.056122	0.95686	1111	1	-0.10991
MYLIP	4	0.73246	0.73958	1	13854	1	0.25043	0.020264	0.056124	0.95686	1112	2	0.25043
DBI	4	0.035953	0.090926	0.966846	1788	2	-0.047035	0.02028	0.056159	0.95686	1113	2	-0.047035
SLC46A3	4	0.47083	0.58017	1	10831	1	0.20092	0.020339	0.056285	0.95686	1114	2	0.20092
HOXC6	4	0.014765	0.045932	0.926721	933	1	0.20559	0.020355	0.056322	0.95686	1115	3	0.20559
CLK1	4	0.40442	0.54943	1	10271	2	0.11057	0.020356	0.056324	0.95686	1116	2	0.11057
TENM3	4	0.49707	0.59308	1	11066	1	0.15519	0.020366	0.056347	0.95686	1117	2	0.15519
FSD2	4	0.88544	0.88539	1	16738	0	0.41456	0.020381	0.056375	0.95686	1118	3	0.41456
ZDHHC12	4	0.49064	0.58985	1	11012	1	0.30955	0.020399	0.056411	0.95686	1119	3	0.30955
LYPD2	4	0.96361	0.96366	1	18265	0	0.27251	0.020406	0.056422	0.95686	1120	3	0.27251
RPL26L1	4	0.7537	0.75722	1	14204	1	0.17006	0.020418	0.056448	0.95686	1121	2	0.17006
NBAS	3	0.97956	0.97969	1	18580	0	0.27141	0.020438	0.052671	0.955587	1122	3	0.27141
HS3ST5	4	0.67192	0.69485	1	13000	1	0.28104	0.020541	0.056728	0.958116	1123	3	0.28104
LTBP2	4	0.93848	0.93855	1	17762	0	0.28146	0.020571	0.056792	0.958116	1124	3	0.28146
HOOK1	4	0.89566	0.89561	1	16952	0	0.32924	0.020593	0.056851	0.958116	1125	2	0.32924
TCTA	4	0.21085	0.3416	0.997	6474	2	-0.131	0.020677	0.057025	0.958116	1126	1	-0.131
USP17L29	4	0.4828	0.58605	1	10945	1	1.0228	0.020746	0.057173	0.958116	1127	3	1.0228
CTXN1	4	0.36861	0.51109	1	9553	2	-0.10449	0.02078	0.057243	0.958116	1128	1	-0.10449
IGLON5	4	0.96514	0.9652	1	18297	0	0.31984	0.020789	0.057261	0.958116	1129	2	0.31984
FAM229A	4	0.90421	0.90422	1	17099	0	0.25156	0.020796	0.057278	0.958116	1130	3	0.25156
TTC13	4	0.82088	0.82085	1	15466	0	0.4021	0.02084	0.05737	0.958116	1131	2	0.4021
CNIH1	4	0.72493	0.73368	1	13739	1	0.24262	0.020852	0.057392	0.958116	1132	3	0.24262
SPERT	4	0.14738	0.27296	0.991872	5196	2	0.050644	0.020883	0.057459	0.958116	1133	2	0.050644
TIGAR	4	0.97797	0.97815	1	18551	0	0.61277	0.020933	0.057564	0.958116	1134	3	0.61277
FCER2	4	0.0088787	0.029864	0.925367	607	1	-0.078021	0.020935	0.057569	0.958116	1135	1	-0.078021
PADI6	4	0.92346	0.92364	1	17464	0	0.43137	0.020968	0.057643	0.958116	1136	3	0.43137
NSMCE2	4	0.9646	0.96464	1	18283	0	0.4916	0.021019	0.057752	0.958116	1137	3	0.4916
YBX3	4	0.87877	0.87876	1	16604	0	0.13712	0.021039	0.057791	0.958116	1138	2	0.13712
WBP2NL	4	0.95684	0.95685	1	18131	0	0.40621	0.021084	0.057885	0.958116	1139	3	0.40621
MBD1	4	0.32862	0.46804	1	8768	1	0.09757	0.02109	0.057895	0.958116	1140	1	0.09757
F2	4	0.15289	0.27893	0.9939	5318	1	0.17414	0.021106	0.05793	0.958116	1141	2	0.17414
ZNF557	4	0.94457	0.94464	1	17886	0	0.25568	0.021114	0.057946	0.958116	1142	3	0.25568
OR52K2	4	0.87443	0.8744	1	16514	0	0.35394	0.021114	0.057947	0.958116	1143	3	0.35394
NCSTN	4	0.96857	0.96864	1	18362	0	0.45848	0.021135	0.058002	0.958116	1144	3	0.45848
OR6C4	4	0.69839	0.71359	1	13347	1	0.12427	0.021142	0.058018	0.958116	1145	2	0.12427
OR13C4	4	0.12022	0.24347	0.991872	4616	1	0.32197	0.021187	0.058119	0.958116	1146	3	0.32197
RIPPLY3	4	0.13406	0.25849	0.991872	4912	2	-0.10451	0.021194	0.058134	0.958116	1147	1	-0.10451
KNOP1	4	0.80677	0.80673	1	15194	0	0.099374	0.021246	0.05824	0.958116	1148	2	0.099374
PRSS57	4	0.54933	0.62006	1	11591	1	0.24451	0.021261	0.058272	0.958116	1149	3	0.24451
GGNBP2	4	0.88621	0.88618	1	16753	0	0.12704	0.021269	0.058292	0.958116	1150	2	0.12704
CHM	4	0.89591	0.89587	1	16956	0	0.21525	0.021269	0.058294	0.958116	1151	3	0.21525
WRN	4	0.54678	0.61871	1	11570	1	-0.14471	0.021297	0.058355	0.958116	1152	1	-0.14471
HIST1H4E	4	0.86683	0.8667	1	16353	0	0.40625	0.021308	0.058375	0.958116	1153	3	0.40625
JAKMIP1	4	0.14081	0.26582	0.991872	5052	1	0.31394	0.021312	0.058382	0.958116	1154	3	0.31394
ACTR8	4	0.93947	0.93959	1	17782	0	0.63335	0.021321	0.058398	0.958116	1155	3	0.63335
PCGF6	4	0.928	0.92818	1	17551	0	0.28273	0.021349	0.058455	0.958116	1156	2	0.28273
XKRY2	4	0.66915	0.69294	1	12966	1	0.24918	0.021355	0.05847	0.958116	1157	2	0.24918
KCNK10	4	0.18293	0.31144	0.996566	5918	1	0.42262	0.021356	0.058472	0.958116	1158	3	0.42262
DYNC2H1	4	0.86816	0.86807	1	16388	0	0.22896	0.02136	0.058478	0.958116	1159	3	0.22896
SPIN2A	4	0.4377	0.56455	1	10555	1	0.30905	0.021452	0.05867	0.958927	1160	2	0.30905
SLC12A7	4	0.91716	0.91723	1	17344	0	0.3633	0.021456	0.058678	0.958927	1161	3	0.3633
GRM5	4	0.59777	0.64761	1	12145	1	0.063424	0.021556	0.0589	0.961737	1162	2	0.063424
C21orf62	4	0.15055	0.27635	0.991872	5278	2	0.030736	0.021597	0.058994	0.961946	1163	2	0.030736
C16orf96	4	0.62271	0.66273	1	12424	1	0.16732	0.021608	0.059014	0.961946	1164	2	0.16732
SHQ1	4	0.31563	0.45415	1	8502	2	0.042744	0.021659	0.059128	0.962669	1165	2	0.042744
NTF4	4	0.49143	0.59026	1	11019	1	0.31681	0.021671	0.059159	0.962669	1166	2	0.31681
USP17L22	3	0.55805	0.57658	1	11680	1	1.2511	0.021698	0.055757	0.95686	1167	2	1.2511
S100A7L2	4	0.73814	0.74407	1	13955	1	-0.085666	0.021711	0.05925	0.963248	1168	1	-0.085666
CFAP57	4	0.66343	0.68902	1	12904	1	0.055571	0.021763	0.059356	0.963248	1169	2	0.055571
PTPRO	4	0.20133	0.33127	0.997	6270	1	0.2314	0.021784	0.059399	0.963248	1170	3	0.2314
PALM3	3	0.92436	0.92444	1	17483	0	0.27778	0.021806	0.056022	0.95686	1171	2	0.27778
STK36	4	0.72778	0.73588	1	13788	1	0.24181	0.021815	0.059467	0.963248	1172	3	0.24181
GRM8	4	0.76122	0.76366	1	14334	1	0.3116	0.021881	0.059601	0.963248	1173	3	0.3116
FLNB	4	0.69549	0.71149	1	13301	1	0.22337	0.021907	0.059661	0.963248	1174	3	0.22337
PTBP2	4	0.82152	0.8215	1	15481	0	0.23882	0.021912	0.059672	0.963248	1175	3	0.23882
HIBADH	4	0.94277	0.94287	1	17850	0	0.1463	0.021937	0.059728	0.963248	1176	2	0.1463
TK2	4	0.76682	0.7686	1	14423	1	0.23395	0.021951	0.059758	0.963248	1177	3	0.23395
ZHX3	4	0.76078	0.76326	1	14324	1	0.4336	0.022013	0.059894	0.963248	1178	3	0.4336
LMOD2	4	0.12874	0.25269	0.991872	4792	2	-0.0022634	0.022021	0.059911	0.963248	1179	2	-0.0022634
C22orf46	4	0.97919	0.97933	1	18573	0	0.37426	0.022024	0.059914	0.963248	1180	3	0.37426
EHD3	4	0.79475	0.79477	1	14954	1	0.33679	0.02204	0.059948	0.963248	1181	3	0.33679
IGDCC3	4	0.97677	0.97698	1	18535	0	0.21643	0.022042	0.059951	0.963248	1182	3	0.21643
SLC17A5	4	0.75885	0.76159	1	14292	1	0.25875	0.022094	0.060068	0.963797	1183	2	0.25875
KIF7	4	0.038566	0.096257	0.97065	1877	3	-0.27495	0.022124	0.060136	0.963797	1184	1	-0.27495
TGS1	4	0.81791	0.81786	1	15407	0	0.52351	0.022182	0.060267	0.964356	1185	2	0.52351
ZFP41	4	0.96496	0.96501	1	18293	0	0.27016	0.022186	0.060272	0.964356	1186	3	0.27016
UBTD1	4	0.79444	0.79448	1	14950	1	0.16151	0.022228	0.060356	0.964552	1187	2	0.16151
HBEGF	4	0.95233	0.95239	1	18040	0	0.34426	0.022243	0.060396	0.964552	1188	3	0.34426
BLOC1S5	4	0.37434	0.51728	1	9664	1	0.18939	0.022261	0.060436	0.964552	1189	2	0.18939
MAPK8IP1	4	0.81036	0.8103	1	15257	0	0.32396	0.022333	0.060599	0.966282	1190	3	0.32396
LARGE	4	0.75443	0.75787	1	14218	1	0.28034	0.022391	0.060723	0.966282	1191	3	0.28034
RASL11A	4	0.32987	0.46941	1	8798	1	0.2785	0.022411	0.060761	0.966282	1192	2	0.2785
DUSP16	4	0.53638	0.61312	1	11470	1	0.097475	0.022434	0.060807	0.966282	1193	2	0.097475
PRSS53	4	0.45274	0.57154	1	10675	1	0.37555	0.022473	0.060892	0.966282	1194	3	0.37555
SLC25A5	4	0.69829	0.71351	1	13344	1	0.60494	0.022517	0.060982	0.966282	1195	3	0.60494
GNGT1	4	0.97995	0.98003	1	18584	0	0.20025	0.022538	0.061032	0.966282	1196	3	0.20025
SIPA1L2	4	0.9461	0.94615	1	17908	0	0.26753	0.022543	0.061043	0.966282	1197	2	0.26753
CIC	4	0.077549	0.17286	0.983592	3306	2	0.031096	0.022589	0.061144	0.966282	1198	2	0.031096
SLC6A12	4	0.2985	0.43569	1	8168	1	0.20202	0.022611	0.061184	0.966282	1199	3	0.20202
ANKUB1	4	0.79317	0.79321	1	14917	1	0.30653	0.022641	0.061247	0.966282	1200	2	0.30653
TNNC1	4	0.97277	0.97292	1	18446	0	0.30779	0.02266	0.061291	0.966282	1201	3	0.30779
RPIA	4	0.91382	0.91383	1	17279	0	0.80147	0.022667	0.061303	0.966282	1202	3	0.80147
USP17L26	4	0.29673	0.4338	1	8132	1	0.40703	0.022667	0.061303	0.966282	1203	2	0.40703
GDAP1	4	0.96141	0.9614	1	18220	0	0.3524	0.022719	0.061422	0.967354	1204	3	0.3524
SCRN3	4	0.94784	0.9479	1	17945	0	0.097971	0.022744	0.061479	0.967463	1205	1	0.097971
RBBP5	3	0.93739	0.93759	1	17741	0	1.1319	0.022747	0.058275	0.958116	1206	2	1.1319
AP3B2	4	0.15377	0.27987	0.9939	5334	2	0.16474	0.022783	0.061561	0.967542	1207	2	0.16474
PPP1R14D	4	0.062869	0.14461	0.974296	2810	1	0.11744	0.022796	0.061587	0.967542	1208	2	0.11744
HELT	4	0.84561	0.84547	1	15950	0	0.31262	0.022864	0.061717	0.967542	1209	3	0.31262
TSSC4	4	0.97673	0.97693	1	18532	0	0.18256	0.022877	0.061747	0.967542	1210	3	0.18256
PSME1	4	0.98999	0.98996	1	18777	0	0.34976	0.0229	0.061792	0.967542	1211	3	0.34976
ADGRD1	3	0.9771	0.97728	1	18543	0	0.26823	0.022903	0.058655	0.958927	1212	3	0.26823
SLC7A4	4	0.93813	0.9382	1	17753	0	0.43302	0.023013	0.062038	0.967542	1213	3	0.43302
PLK2	4	0.068065	0.15476	0.980196	2984	1	0.35967	0.023027	0.062068	0.967542	1214	3	0.35967
SBDS	4	0.9894	0.98939	1	18772	0	0.81562	0.023045	0.062104	0.967542	1215	3	0.81562
NOX4	4	0.38922	0.53311	1	9946	1	0.0081871	0.023054	0.062128	0.967542	1216	1	0.0081871
VPS11	4	0.50966	0.59934	1	11195	1	0.068422	0.023106	0.062235	0.967542	1217	2	0.068422
PRKCD	4	0.85253	0.8524	1	16087	0	0.21676	0.023157	0.062355	0.967542	1218	2	0.21676
AMELX	4	0.85128	0.85114	1	16059	0	0.17825	0.023158	0.062355	0.967542	1219	3	0.17825
TXNRD3NB	4	0.5616	0.62683	1	11722	1	0.025781	0.023209	0.062466	0.967542	1220	1	0.025781
HTRA4	4	0.98459	0.98458	1	18672	0	0.28902	0.023223	0.062499	0.967542	1221	3	0.28902
KIAA1598	4	0.062221	0.14338	0.972813	2791	2	-0.072013	0.023238	0.062527	0.967542	1222	2	-0.072013
NPPB	4	0.10275	0.21939	0.990539	4186	2	-0.27109	0.023261	0.062573	0.967542	1223	1	-0.27109
PAPOLB	4	0.65794	0.68543	1	12825	1	0.18565	0.023265	0.062582	0.967542	1224	2	0.18565
POP5	3	0.11145	0.19371	0.986491	4451	1	-0.079394	0.02329	0.059586	0.963248	1225	1	-0.079394
VAC14	4	0.022151	0.062044	0.946444	1235	3	-0.45369	0.023313	0.062687	0.967542	1226	1	-0.45369
ASB12	4	0.97914	0.97928	1	18571	0	0.36026	0.023333	0.062734	0.967542	1227	3	0.36026
CCL15	4	0.26983	0.40489	1	7650	1	0.29098	0.023342	0.062752	0.967542	1228	3	0.29098
GGTLC2	4	0.8585	0.85835	1	16205	0	0.2913	0.023364	0.06281	0.967542	1229	3	0.2913
SIGLEC15	4	0.06284	0.14456	0.974296	2808	2	-0.27717	0.023416	0.06291	0.967542	1230	1	-0.27717
RUSC1-AS1	4	0.9881	0.9881	1	18751	0	0.40463	0.023457	0.063002	0.967542	1231	3	0.40463
ESYT1	4	0.61171	0.65603	1	12311	1	0.127	0.023467	0.063034	0.967542	1232	2	0.127
MARCO	4	0.70286	0.71686	1	13408	1	0.24836	0.023516	0.063133	0.967542	1233	2	0.24836
MKS1	3	0.76506	0.76533	1	14394	0	-0.10114	0.023523	0.060113	0.963797	1234	1	-0.10114
CDK2	4	0.98744	0.98742	1	18731	0	0.72042	0.023535	0.063177	0.967542	1235	3	0.72042
MAPK8IP2	4	0.87755	0.8775	1	16576	0	0.32748	0.02354	0.063189	0.967542	1236	3	0.32748
CCR6	4	0.98673	0.98667	1	18716	0	0.22531	0.023559	0.063226	0.967542	1237	3	0.22531
MAP2K6	4	0.72507	0.73379	1	13741	1	0.24528	0.023571	0.063254	0.967542	1238	2	0.24528
ACE2	4	0.9277	0.92787	1	17544	0	0.27013	0.023589	0.063286	0.967542	1239	3	0.27013
AP3M2	4	0.78949	0.78965	1	14841	1	0.27343	0.023643	0.063405	0.967542	1240	2	0.27343
C17orf53	4	0.71164	0.72332	1	13532	1	0.58489	0.023692	0.063527	0.967542	1241	2	0.58489
TAF15	4	0.88973	0.88968	1	16831	0	0.41137	0.023725	0.063595	0.967542	1242	3	0.41137
ARHGAP15	4	0.96108	0.96108	1	18214	0	0.28822	0.023734	0.063616	0.967542	1243	3	0.28822
SEMA7A	4	0.90586	0.90588	1	17129	0	0.19194	0.023777	0.063712	0.967542	1244	2	0.19194
FAM19A5	4	0.87575	0.87573	1	16543	0	0.30787	0.023813	0.063786	0.967542	1245	3	0.30787
FXN	3	0.53127	0.55646	1	11415	1	0.8762	0.023845	0.060906	0.966282	1246	2	0.8762
GRAMD4	4	0.45551	0.57288	1	10698	1	0.33399	0.023878	0.063927	0.967542	1247	3	0.33399
GFRA3	4	0.78391	0.78432	1	14745	1	0.1422	0.02388	0.063931	0.967542	1248	2	0.1422
PDP2	4	0.77907	0.77967	1	14653	1	0.26337	0.023897	0.063962	0.967542	1249	3	0.26337
NOG	4	0.98789	0.9879	1	18743	0	0.26156	0.023981	0.064148	0.967542	1250	3	0.26156
EFS	4	0.76805	0.76971	1	14444	1	0.27486	0.023984	0.064151	0.967542	1251	3	0.27486
SERPINB3	4	0.20815	0.33869	0.997	6421	1	0.26652	0.02399	0.064161	0.967542	1252	3	0.26652
TCAF1	4	0.65695	0.68479	1	12816	1	0.41568	0.024005	0.064198	0.967542	1253	3	0.41568
DNASE2B	4	0.29264	0.42939	1	8059	1	0.16279	0.024013	0.064217	0.967542	1254	3	0.16279
SEL1L	4	0.55491	0.6231	1	11644	1	0.12835	0.024035	0.064269	0.967542	1255	2	0.12835
LMNTD2	4	0.042532	0.10434	0.97065	2018	1	0.44206	0.024065	0.064338	0.967542	1256	3	0.44206
UBR1	4	0.52035	0.60481	1	11308	1	0.098405	0.024087	0.064376	0.967542	1257	2	0.098405
WTAP	4	0.95011	0.95018	1	17993	0	0.32975	0.024098	0.064406	0.967542	1258	3	0.32975
PMCH	4	0.23227	0.36462	0.997246	6939	2	0.050758	0.024138	0.064487	0.967542	1259	2	0.050758
CYTL1	4	0.30148	0.43885	1	8217	2	0.15329	0.024151	0.064516	0.967542	1260	2	0.15329
CRAMP1L	4	0.91425	0.91427	1	17288	0	0.51413	0.024159	0.064526	0.967542	1261	3	0.51413
CMTR1	4	0.97601	0.97621	1	18518	0	1.2804	0.02416	0.06453	0.967542	1262	3	1.2804
GOLGA6C	4	0.82938	0.82937	1	15638	0	0.30557	0.02419	0.064597	0.967542	1263	3	0.30557
LEMD1	4	0.76938	0.7709	1	14467	1	0.52461	0.024196	0.064607	0.967542	1264	3	0.52461
ENO2	4	0.54483	0.61764	1	11551	1	0.031954	0.024242	0.064712	0.967542	1265	1	0.031954
RP1L1	4	0.68951	0.70721	1	13228	1	0.31348	0.024271	0.064779	0.967542	1266	3	0.31348
C9orf117	4	0.86773	0.86761	1	16377	0	0.22992	0.024297	0.064824	0.967542	1267	3	0.22992
RNF123	4	0.20715	0.33761	0.997	6397	2	0.14025	0.024325	0.064881	0.967542	1268	2	0.14025
PITX2	4	0.96845	0.96852	1	18358	0	0.25176	0.024328	0.064886	0.967542	1269	3	0.25176
IFT52	4	0.84497	0.84484	1	15940	0	0.16471	0.024371	0.064984	0.967542	1270	2	0.16471
ZNF770	4	0.96467	0.96472	1	18285	0	0.35323	0.024483	0.065193	0.967542	1271	3	0.35323
SLC36A2	4	0.68325	0.70281	1	13147	1	0.20933	0.0245	0.065222	0.967542	1272	2	0.20933
ADAMTSL2	4	0.98946	0.98944	1	18773	0	0.43131	0.024502	0.065226	0.967542	1273	3	0.43131
SLC25A27	4	0.66426	0.68959	1	12914	1	0.28146	0.024559	0.065351	0.967542	1274	3	0.28146
NBEAL2	4	0.40038	0.54514	1	10197	2	0.10331	0.0246	0.065433	0.967542	1275	2	0.10331
NOVA2	4	0.18545	0.31418	0.996831	5967	2	-0.095403	0.024603	0.06544	0.967542	1276	1	-0.095403
NAPRT	4	0.66807	0.69219	1	12950	1	0.67792	0.024609	0.065453	0.967542	1277	3	0.67792
YAF2	4	0.79045	0.79056	1	14863	1	0.30208	0.024625	0.065492	0.967542	1278	3	0.30208
RBM4	4	0.82133	0.8213	1	15477	0	0.52738	0.024654	0.065541	0.967542	1279	3	0.52738
CREBBP	4	0.015752	0.048173	0.926721	975	1	0.1778	0.024654	0.065542	0.967542	1280	1	0.1778
ACE	4	0.96992	0.96998	1	18390	0	0.31636	0.024692	0.065627	0.967542	1281	3	0.31636
PLA2R1	4	0.82708	0.82706	1	15586	0	0.16676	0.024701	0.065646	0.967542	1282	2	0.16676
COMP	4	0.16673	0.29396	0.996566	5578	1	-0.040659	0.024706	0.065663	0.967542	1283	1	-0.040659
WDR70	4	0.98677	0.98671	1	18717	0	0.85432	0.02472	0.065694	0.967542	1284	3	0.85432
ELANE	4	0.63178	0.66842	1	12513	1	0.26027	0.024729	0.065706	0.967542	1285	2	0.26027
OR4F16	4	0.94769	0.94774	1	17940	0	0.25569	0.024738	0.065726	0.967542	1286	2	0.25569
PLCXD2	4	0.077797	0.17333	0.983592	3315	1	0.22341	0.024758	0.065772	0.967542	1287	2	0.22341
SCYL3	4	0.41744	0.55546	1	10388	1	0.30101	0.024766	0.065789	0.967542	1288	2	0.30101
CNR1	4	0.80427	0.80422	1	15135	0	0.21035	0.024809	0.065881	0.968153	1289	2	0.21035
TMEM256	4	0.94685	0.94691	1	17923	0	0.28109	0.024835	0.065934	0.968185	1290	3	0.28109
SERPINB13	4	0.27946	0.4153	1	7820	1	0.18003	0.024912	0.066112	0.969777	1291	2	0.18003
PTPRU	4	0.97239	0.97254	1	18433	0	0.31927	0.024925	0.066144	0.969777	1292	3	0.31927
ERGIC3	4	0.84636	0.84626	1	15965	0	0.018858	0.024964	0.066228	0.970255	1293	2	0.018858
UQCRH	3	0.068704	0.13541	0.972813	3009	1	0.24806	0.024996	0.063643	0.967542	1294	2	0.24806
TMEM263	4	0.57876	0.63643	1	11927	1	0.1834	0.025015	0.066341	0.971027	1295	3	0.1834
CALHM1	4	0.76475	0.76671	1	14385	1	0.23063	0.025045	0.066392	0.971027	1296	3	0.23063
TMEM109	4	0.69463	0.7109	1	13292	1	0.25721	0.025067	0.066435	0.971027	1297	3	0.25721
KPNA3	4	0.87181	0.87177	1	16463	0	0.19482	0.02509	0.066501	0.971027	1298	2	0.19482
CIT	4	0.34462	0.48526	1	9073	1	0.32246	0.025131	0.066582	0.971027	1299	3	0.32246
INTS12	4	0.30673	0.44448	1	8333	1	0.32534	0.02517	0.06666	0.971027	1300	3	0.32534
KIAA1586	4	0.68103	0.70124	1	13124	1	0.19203	0.02517	0.066662	0.971027	1301	2	0.19203
LRRC49	4	0.82555	0.82553	1	15560	0	-0.06005	0.025222	0.066775	0.971027	1302	1	-0.06005
CD28	4	0.96927	0.96932	1	18378	0	0.22667	0.025229	0.066794	0.971027	1303	3	0.22667
PLD3	4	0.025273	0.068639	0.946996	1367	2	0.095236	0.025238	0.066811	0.971027	1304	2	0.095236
PRR35	4	0.20309	0.33314	0.997	6301	2	-0.074088	0.025273	0.066886	0.971027	1305	2	-0.074088
B3GNT8	4	0.73089	0.73833	1	13831	1	0.27134	0.025314	0.066978	0.971027	1306	3	0.27134
SERINC5	4	0.75847	0.76126	1	14286	1	0.29158	0.025359	0.067081	0.971027	1307	2	0.29158
GPR88	4	0.7938	0.79386	1	14931	1	0.1237	0.025376	0.067112	0.971027	1308	2	0.1237
SAMD15	4	0.77977	0.78032	1	14666	1	0.34238	0.025382	0.06712	0.971027	1309	3	0.34238
COPS8	4	0.020943	0.05947	0.946444	1190	2	0.02362	0.025425	0.067209	0.971027	1310	2	0.02362
PVRL3	4	0.4894	0.58924	1	10998	1	0.11502	0.025428	0.067218	0.971027	1311	2	0.11502
CCDC33	4	0.85233	0.85219	1	16083	0	0.25675	0.025434	0.067229	0.971027	1312	2	0.25675
TMEM139	4	0.79418	0.79423	1	14941	1	0.39185	0.025443	0.067246	0.971027	1313	3	0.39185
DEFA4	4	0.8353	0.8353	1	15753	0	0.2645	0.025546	0.067471	0.973539	1314	3	0.2645
ART1	3	0.9744	0.97458	1	18480	0	0.24874	0.025596	0.065073	0.967542	1315	3	0.24874
ORAOV1	3	0.53431	0.5587	1	11448	1	1.3562	0.02562	0.065127	0.967542	1316	2	1.3562
FRMD8	4	0.045967	0.11129	0.97065	2170	2	0.21792	0.025621	0.067608	0.974777	1317	2	0.21792
MAGIX	4	0.8703	0.87021	1	16429	0	0.18112	0.025726	0.067834	0.976616	1318	3	0.18112
GRIK2	4	0.46303	0.57646	1	10758	1	0.16355	0.025736	0.06785	0.976616	1319	3	0.16355
ENO1	4	0.75629	0.75944	1	14254	1	0.56959	0.025752	0.067889	0.976616	1320	2	0.56959
CYP27C1	4	0.32723	0.46654	1	8741	2	0.042626	0.025789	0.067958	0.976879	1321	2	0.042626
ZNF680	4	0.040139	0.09952	0.97065	1928	1	0.30496	0.025819	0.068034	0.977055	1322	3	0.30496
PRAMEF6	4	0.22626	0.3582	0.997246	6809	2	-0.17506	0.02584	0.068073	0.977055	1323	1	-0.17506
FTSJ2	3	0.60179	0.61155	1	12187	1	-0.049318	0.025849	0.065647	0.967542	1324	1	-0.049318
DNAAF2	4	0.49914	0.59413	1	11091	1	0.12381	0.025875	0.068139	0.977273	1325	2	0.12381
ZNF502	2	0.97413	0.97421	1	18474	0	0.28249	0.025875	0.04754	0.937444	1326	2	0.28249
SETD2	4	0.96443	0.96448	1	18282	0	0.35132	0.025959	0.068317	0.978361	1327	2	0.35132
SLC15A3	4	0.98353	0.98351	1	18648	0	0.37986	0.02604	0.068481	0.979461	1328	3	0.37986
LOC728392	4	0.7576	0.76055	1	14271	1	0.085835	0.026046	0.068497	0.979461	1329	1	0.085835
ARSG	4	0.03002	0.07861	0.949464	1569	2	0.11767	0.026167	0.068771	0.981504	1330	2	0.11767
C1QTNF1	4	0.30972	0.44774	1	8394	1	0.059966	0.026201	0.068849	0.981504	1331	2	0.059966
C1orf210	4	0.70995	0.72203	1	13503	1	0.25844	0.026252	0.068959	0.981504	1332	2	0.25844
NPIPB3	4	0.036311	0.091658	0.966846	1805	1	0.34767	0.026252	0.06896	0.981504	1333	2	0.34767
PLEKHA2	4	0.61166	0.65599	1	12310	1	0.23045	0.026299	0.069064	0.981504	1334	2	0.23045
STK24	4	0.56234	0.62723	1	11731	1	0.40274	0.026306	0.069078	0.981504	1335	3	0.40274
RFX1	4	0.30944	0.44743	1	8385	1	0.18393	0.026318	0.069107	0.981504	1336	2	0.18393
TM9SF1	4	0.79185	0.79192	1	14889	1	0.17025	0.026337	0.069144	0.981504	1337	2	0.17025
ZBTB45	4	0.88456	0.88451	1	16726	0	-0.066997	0.026356	0.069179	0.981504	1338	1	-0.066997
ZC3H13	4	0.64829	0.67907	1	12721	1	0.25498	0.026356	0.069182	0.981504	1339	2	0.25498
TMEM164	4	0.91937	0.91945	1	17378	0	0.17657	0.026404	0.069286	0.981504	1340	2	0.17657
GRB2	4	0.79293	0.79297	1	14911	1	0.29519	0.026407	0.069291	0.981504	1341	2	0.29519
BAZ1B	4	0.85631	0.85622	1	16172	0	0.39926	0.026442	0.069358	0.981504	1342	2	0.39926
IAH1	4	0.88227	0.88223	1	16683	0	0.29238	0.026451	0.069382	0.981504	1343	3	0.29238
NCOA5	4	0.57969	0.63698	1	11939	1	0.66588	0.026496	0.069471	0.981504	1344	3	0.66588
MED10	4	0.23674	0.36947	0.997529	7028	1	0.25414	0.02651	0.069489	0.981504	1345	1	0.25414
ZBTB24	4	0.53576	0.61278	1	11462	1	0.2164	0.026546	0.069573	0.981504	1346	2	0.2164
PLAGL2	4	0.91611	0.91617	1	17323	0	0.14516	0.026613	0.069723	0.981504	1347	2	0.14516
CPZ	4	0.30964	0.44766	1	8391	1	0.0037979	0.026665	0.069852	0.981504	1348	1	0.0037979
C16orf58	4	0.12746	0.25128	0.991872	4775	2	0.008976	0.02668	0.069884	0.981504	1349	2	0.008976
C20orf96	4	0.57129	0.63216	1	11843	1	0.055297	0.026716	0.069973	0.981504	1350	1	0.055297
EFNA1	4	0.71843	0.72857	1	13627	1	0.33231	0.026718	0.06998	0.981504	1351	2	0.33231
AFF4	4	0.98231	0.98232	1	18628	0	0.23428	0.026794	0.070139	0.981504	1352	3	0.23428
PDE4A	4	0.89429	0.89425	1	16920	0	0.25781	0.026819	0.070188	0.981504	1353	2	0.25781
GIN1	4	0.53069	0.61014	1	11410	1	0.2364	0.026843	0.070229	0.981504	1354	3	0.2364
AS3MT	4	0.46946	0.57949	1	10823	1	0.22043	0.026871	0.07029	0.981504	1355	2	0.22043
AP1G2	4	0.58694	0.64124	1	12037	1	0.25373	0.026908	0.070383	0.981504	1356	3	0.25373
ANGPTL2	4	0.70446	0.718	1	13432	1	-0.17912	0.026922	0.070413	0.981504	1357	1	-0.17912
FOXD4L3	3	0.87173	0.87186	1	16459	0	0.60806	0.026933	0.068202	0.977439	1358	2	0.60806
MCTS1	4	0.41635	0.55498	1	10377	1	0.16124	0.026938	0.070446	0.981504	1359	3	0.16124
SCAMP4	4	0.6798	0.70035	1	13110	1	0.050565	0.026947	0.070467	0.981504	1360	2	0.050565
PLCD3	4	0.61793	0.65984	1	12377	1	0.16762	0.026974	0.070517	0.981504	1361	2	0.16762
MON1B	4	0.91659	0.91666	1	17333	0	0.19701	0.026976	0.07052	0.981504	1362	2	0.19701
CECR6	4	0.19947	0.32926	0.997	6237	1	0.20557	0.027048	0.070668	0.981504	1363	3	0.20557
ZFAND1	4	0.066618	0.15199	0.980196	2929	3	-0.23993	0.027077	0.070723	0.981504	1364	1	-0.23993
PHF21A	4	0.62844	0.66635	1	12485	1	0.3343	0.027178	0.070952	0.981504	1365	2	0.3343
GDPD4	4	0.7115	0.72323	1	13527	1	0.095352	0.027179	0.070956	0.981504	1366	2	0.095352
VN1R5	4	0.18943	0.3185	0.996831	6044	2	0.065794	0.027274	0.071159	0.981504	1367	2	0.065794
UBR3	4	0.28915	0.42569	1	8010	1	0.15353	0.027284	0.071174	0.981504	1368	2	0.15353
PTK7	4	0.17754	0.30562	0.996566	5795	1	0.2453	0.027321	0.071251	0.981504	1369	3	0.2453
TMEM70	4	0.97611	0.97631	1	18521	0	0.48164	0.027331	0.071277	0.981504	1370	3	0.48164
ZNF114	4	0.97394	0.97409	1	18471	0	0.51122	0.027371	0.071353	0.981504	1371	3	0.51122
PRODH2	4	0.24478	0.378	0.999757	7180	1	0.0026406	0.027385	0.071385	0.981504	1372	1	0.0026406
KIF26A	4	0.80637	0.8063	1	15183	0	0.19936	0.027409	0.071423	0.981504	1373	3	0.19936
CFHR1	4	0.28846	0.42493	1	7996	1	-0.042796	0.027437	0.071484	0.981504	1374	1	-0.042796
OR5V1	4	0.20355	0.33364	0.997	6310	1	0.23485	0.027442	0.071492	0.981504	1375	3	0.23485
GRHPR	4	0.20767	0.33819	0.997	6406	2	0.094927	0.027544	0.071712	0.981504	1376	2	0.094927
TAS2R41	4	0.78428	0.78467	1	14750	1	0.27808	0.027564	0.071749	0.981504	1377	2	0.27808
NFATC2IP	4	0.987	0.98695	1	18725	0	0.40033	0.02758	0.071782	0.981504	1378	3	0.40033
CLU	4	0.8736	0.87356	1	16498	0	0.2411	0.027583	0.071792	0.981504	1379	2	0.2411
ANKS6	4	0.16568	0.29284	0.996566	5553	2	-0.17106	0.027694	0.072035	0.981504	1380	1	-0.17106
KIF5B	4	0.94414	0.94424	1	17874	0	0.40459	0.027738	0.07213	0.981504	1381	3	0.40459
ARHGAP19	3	0.91393	0.91402	1	17281	0	0.096953	0.027746	0.070081	0.981504	1382	1	0.096953
KPTN	4	0.34967	0.49071	1	9176	2	-0.17338	0.027746	0.072146	0.981504	1383	1	-0.17338
GPAT2	4	0.68118	0.70135	1	13127	1	0.32932	0.027748	0.072154	0.981504	1384	2	0.32932
FZD1	4	0.84622	0.84611	1	15960	0	0.21438	0.027763	0.072189	0.981504	1385	3	0.21438
MFSD6	4	0.69418	0.71058	1	13284	1	0.23645	0.027773	0.072212	0.981504	1386	3	0.23645
HDX	4	0.64165	0.67473	1	12628	1	0.36188	0.027799	0.072274	0.981504	1387	3	0.36188
KLRC4	4	0.92283	0.92298	1	17447	0	0.25161	0.027849	0.072381	0.981504	1388	2	0.25161
HDAC10	4	0.087158	0.19099	0.984956	3653	1	0.24523	0.027886	0.072452	0.981504	1389	3	0.24523
MIS18A	3	0.41472	0.47653	1	10357	1	0.1744	0.027939	0.070533	0.981504	1390	1	0.1744
FBXO24	4	0.34331	0.48387	1	9049	1	0.23599	0.027947	0.072573	0.981504	1391	3	0.23599
PEAK1	4	0.76181	0.76417	1	14342	1	0.11355	0.027951	0.072582	0.981504	1392	1	0.11355
ZC3H18	4	0.50834	0.59869	1	11181	1	0.44474	0.027958	0.072593	0.981504	1393	3	0.44474
PEX5L	4	0.69232	0.70923	1	13259	1	0.28236	0.027981	0.072646	0.981504	1394	2	0.28236
SF3B2	4	0.76361	0.76573	1	14370	1	0.52252	0.028009	0.072713	0.981504	1395	3	0.52252
PSMD9	4	0.79004	0.79017	1	14854	1	0.15642	0.028054	0.072796	0.981504	1396	2	0.15642
UNK	4	0.76585	0.76768	1	14407	1	0.15372	0.028106	0.072911	0.981504	1397	2	0.15372
TMEM189-UBE2V1	4	0.7366	0.7428	1	13927	1	0.29998	0.028108	0.072915	0.981504	1398	2	0.29998
CCDC84	4	0.73552	0.74194	1	13910	1	0.55816	0.028127	0.072947	0.981504	1399	3	0.55816
FAM163B	4	0.10523	0.22387	0.991872	4261	1	0.036738	0.028157	0.073008	0.981504	1400	1	0.036738
OR51A2	4	0.66145	0.68774	1	12870	1	0.20148	0.028196	0.073087	0.981504	1401	2	0.20148
STAMBP	4	0.89681	0.89674	1	16974	0	0.14268	0.028209	0.073113	0.981504	1402	2	0.14268
RNF7	4	0.92315	0.92332	1	17454	0	0.2195	0.02826	0.073218	0.981504	1403	2	0.2195
MALL	4	0.12189	0.24529	0.991872	4655	1	0.28464	0.028264	0.073229	0.981504	1404	2	0.28464
LOC100130370	4	0.95082	0.95087	1	18011	0	0.3127	0.028272	0.073244	0.981504	1405	3	0.3127
NMNAT1	4	0.33352	0.4733	1	8855	2	-0.62547	0.028312	0.073323	0.981504	1406	1	-0.62547
EIF4G3	4	0.16089	0.28763	0.996566	5462	1	0.27176	0.028318	0.073342	0.981504	1407	3	0.27176
VPS52	3	0.97166	0.97184	1	18422	0	0.59722	0.028336	0.071456	0.981504	1408	3	0.59722
FGF18	4	0.31756	0.45622	1	8537	1	0.15057	0.028362	0.073441	0.981504	1409	2	0.15057
TGIF1	4	0.093909	0.20352	0.986491	3885	2	-0.10247	0.028363	0.073443	0.981504	1410	2	-0.10247
SARDH	4	0.97434	0.97449	1	18479	0	0.35405	0.028375	0.073463	0.981504	1411	3	0.35405
UPF1	4	0.3835	0.52695	1	9837	1	0.36587	0.028414	0.073552	0.981504	1412	2	0.36587
TMEM168	4	0.52286	0.60611	1	11333	1	0.32689	0.028438	0.073596	0.981504	1413	3	0.32689
ACTBL2	4	0.13827	0.2631	0.991872	4997	1	0.29983	0.028515	0.07375	0.981504	1414	3	0.29983
GALNT11	4	0.95417	0.95419	1	18082	0	0.3159	0.028569	0.073863	0.981504	1415	2	0.3159
TRABD2A	4	0.91734	0.9174	1	17346	0	0.16161	0.028569	0.073863	0.981504	1416	2	0.16161
UHRF1BP1	4	0.68632	0.70498	1	13187	1	0.13863	0.028588	0.073906	0.981504	1417	2	0.13863
GNRH1	4	0.031445	0.081598	0.951149	1628	1	0.26459	0.028598	0.073931	0.981504	1418	2	0.26459
SNAPC4	3	0.66954	0.67055	1	12969	1	0.46769	0.02864	0.072186	0.981504	1419	2	0.46769
C19orf35	4	0.68784	0.70601	1	13201	1	0.42136	0.028667	0.074079	0.981504	1420	3	0.42136
IGFBP7	4	0.98844	0.98845	1	18754	0	0.29629	0.028682	0.074114	0.981504	1421	3	0.29629
KIF22	4	0.25927	0.39367	1	7447	2	0.24268	0.028723	0.074199	0.981504	1422	2	0.24268
LCN9	4	0.77393	0.77495	1	14548	1	0.1264	0.028736	0.074223	0.981504	1423	2	0.1264
PRADC1	4	0.86225	0.86215	1	16291	0	0.26692	0.028756	0.074276	0.981504	1424	3	0.26692
SHISA5	4	0.84381	0.84369	1	15918	0	0.090683	0.028774	0.074314	0.981504	1425	2	0.090683
NDST4	4	0.53703	0.61348	1	11474	1	0.40011	0.028775	0.074316	0.981504	1426	3	0.40011
CSNK1D	4	0.98612	0.98611	1	18708	0	0.43945	0.028776	0.074317	0.981504	1427	3	0.43945
CCDC13	4	0.70822	0.72078	1	13483	1	0.22116	0.028825	0.074435	0.981504	1428	2	0.22116
PNMA5	4	0.1255	0.24918	0.991872	4734	2	0.013459	0.028877	0.074535	0.981504	1429	2	0.013459
TRIM33	4	0.98801	0.98802	1	18748	0	0.21173	0.028912	0.074613	0.981504	1430	3	0.21173
OR10H1	4	0.6961	0.71191	1	13310	1	0.2101	0.028923	0.074639	0.981504	1431	2	0.2101
SFXN2	3	0.97108	0.97122	1	18414	0	0.28505	0.028925	0.07285	0.981504	1432	3	0.28505
RAB14	4	0.98293	0.98296	1	18640	0	0.31839	0.02898	0.074769	0.981504	1433	3	0.31839
TEF	4	0.39788	0.54245	1	10145	2	0.44121	0.028983	0.074775	0.981504	1434	2	0.44121
OR10J5	4	0.30224	0.43964	1	8235	1	0.32445	0.029032	0.074869	0.981504	1435	2	0.32445
AGTR2	4	0.9627	0.96272	1	18251	0	0.15387	0.029062	0.074936	0.981504	1436	2	0.15387
MAP3K10	4	0.84647	0.84637	1	15969	0	0.32494	0.029082	0.074989	0.981504	1437	3	0.32494
KAAG1	4	0.50843	0.59873	1	11183	1	0.22772	0.029134	0.075108	0.981504	1438	2	0.22772
ST8SIA6	4	0.29455	0.43139	1	8090	1	0.23274	0.029138	0.075113	0.981504	1439	3	0.23274
NR0B1	4	0.89007	0.89003	1	16842	0	-0.016547	0.029186	0.075228	0.981504	1440	1	-0.016547
UHRF1	4	0.97189	0.97204	1	18427	0	0.89976	0.029193	0.075238	0.981504	1441	3	0.89976
ABCA7	4	0.58474	0.63997	1	12012	1	0.17194	0.029231	0.07532	0.981504	1442	2	0.17194
PMF1-BGLAP	4	0.53262	0.61114	1	11430	1	0.58658	0.029233	0.075327	0.981504	1443	3	0.58658
GRIN2A	4	0.088777	0.19404	0.986491	3711	1	0.27249	0.029238	0.075337	0.981504	1444	3	0.27249
GPR37	3	0.97075	0.9709	1	18408	0	0.41495	0.029249	0.073602	0.981504	1445	3	0.41495
OR6C70	4	0.29862	0.43582	1	8170	1	0.20136	0.029254	0.075366	0.981504	1446	3	0.20136
CUL5	4	0.15432	0.28046	0.9939	5351	2	-0.10661	0.029289	0.075431	0.981504	1447	1	-0.10661
PPP4R1	4	0.4866	0.58793	1	10978	1	0.19614	0.029296	0.075448	0.981504	1448	3	0.19614
SH3BP5L	4	0.41163	0.55289	1	10332	1	0.31927	0.029301	0.075459	0.981504	1449	3	0.31927
PPEF2	4	0.90588	0.90589	1	17130	0	0.31849	0.029317	0.075493	0.981504	1450	3	0.31849
SFTA2	4	0.69236	0.70927	1	13261	1	0.23311	0.029333	0.075526	0.981504	1451	3	0.23311
EZH2	4	0.43473	0.56322	1	10533	1	0.24444	0.02934	0.075543	0.981504	1452	2	0.24444
FIGLA	4	0.51859	0.60389	1	11293	1	0.25365	0.029381	0.075624	0.981504	1453	3	0.25365
POMK	4	0.78165	0.78217	1	14703	1	0.1542	0.029391	0.075648	0.981504	1454	2	0.1542
ZSCAN26	4	0.15651	0.28288	0.99619	5384	2	0.018653	0.0294	0.075661	0.981504	1455	2	0.018653
MFAP5	4	0.65631	0.68436	1	12804	1	0.15431	0.029443	0.07576	0.981504	1456	2	0.15431
ZNF688	4	0.66554	0.69048	1	12924	1	0.33441	0.029444	0.075762	0.981504	1457	3	0.33441
TRIT1	3	0.97053	0.97068	1	18402	0	0.7651	0.029472	0.074131	0.981504	1458	3	0.7651
RPS15	2	0.5138	0.51479	1	11246	1	0.62922	0.029487	0.053958	0.956643	1459	1	0.62922
SPRED2	4	0.82006	0.82002	1	15452	0	0.34216	0.029492	0.075869	0.981504	1460	3	0.34216
CHRNB3	4	0.15373	0.27983	0.9939	5332	1	0.061355	0.029494	0.075875	0.981504	1461	1	0.061355
FLG2	4	0.80432	0.80426	1	15136	0	0.15547	0.029499	0.075883	0.981504	1462	2	0.15547
POMT1	4	0.72029	0.73007	1	13661	1	0.36032	0.029539	0.075971	0.981504	1463	3	0.36032
DENND2D	4	0.56072	0.62633	1	11710	1	0.12244	0.029559	0.076014	0.981504	1464	2	0.12244
COL14A1	4	0.65657	0.68454	1	12810	1	0.085311	0.029597	0.076092	0.981504	1465	2	0.085311
AGAP3	4	0.59559	0.64633	1	12126	1	0.40045	0.029599	0.076095	0.981504	1466	3	0.40045
VGLL2	4	0.82323	0.82324	1	15518	0	0.37161	0.029609	0.076116	0.981504	1467	3	0.37161
PAM	4	0.85992	0.85976	1	16241	0	0.1433	0.029629	0.076162	0.981504	1468	2	0.1433
IL37	4	0.28552	0.4218	1	7938	1	0.22468	0.029689	0.076279	0.981504	1469	3	0.22468
PARP1	4	0.50855	0.59879	1	11185	1	0.2532	0.029699	0.076301	0.981504	1470	2	0.2532
GFM2	4	0.27568	0.41117	1	7751	2	-0.14123	0.0297	0.076303	0.981504	1471	2	-0.14123
FARSA	4	0.97675	0.97695	1	18534	0	0.39091	0.0297	0.076303	0.981504	1472	2	0.39091
RBM24	4	0.71117	0.72297	1	13521	1	0.12318	0.029789	0.076514	0.981504	1473	2	0.12318
GBP5	4	0.78296	0.78341	1	14727	1	0.27783	0.029811	0.076558	0.981504	1474	3	0.27783
NMT1	3	0.83258	0.83259	1	15703	0	0.11227	0.029833	0.07496	0.981504	1475	1	0.11227
CXCR5	4	0.68015	0.7006	1	13116	1	0.32777	0.029854	0.076639	0.981504	1476	3	0.32777
HACD2	4	0.24762	0.38113	1	7238	2	0.11254	0.02986	0.076651	0.981504	1477	2	0.11254
CXCL3	4	0.89815	0.89808	1	16996	0	0.29099	0.029905	0.076748	0.981504	1478	2	0.29099
KPNA5	4	0.91092	0.91089	1	17225	0	0.14523	0.029905	0.076749	0.981504	1479	2	0.14523
ZCCHC13	4	0.47487	0.58214	1	10872	1	0.2611	0.029923	0.076785	0.981504	1480	3	0.2611
METTL20	4	0.89049	0.89045	1	16853	0	0.23484	0.029929	0.076796	0.981504	1481	3	0.23484
PPARGC1B	4	0.70021	0.71492	1	13366	1	0.12479	0.02993	0.076798	0.981504	1482	2	0.12479
SULT1A4	4	0.87018	0.87009	1	16427	0	0.37068	0.029939	0.076816	0.981504	1483	3	0.37068
SPSB3	4	0.79997	0.79991	1	15043	1	0.21879	0.029961	0.076866	0.981504	1484	3	0.21879
B4GALNT4	4	0.68321	0.70278	1	13146	1	0.29625	0.029966	0.076878	0.981504	1485	3	0.29625
STK10	4	0.83361	0.83358	1	15724	0	0.1869	0.02998	0.076911	0.981504	1486	2	0.1869
CLEC3B	4	0.94132	0.9414	1	17815	0	0.18061	0.030008	0.076968	0.981569	1487	2	0.18061
PTPN9	4	0.32554	0.46468	1	8707	1	0.29756	0.030033	0.077028	0.981687	1488	3	0.29756
CARD17	4	0.65345	0.68243	1	12775	1	0.16813	0.030059	0.077088	0.981792	1489	2	0.16813
RGS18	4	0.25551	0.38955	1	7377	2	-0.092879	0.030162	0.077297	0.983179	1490	2	-0.092879
JAK2	4	0.93093	0.93106	1	17618	0	0.21787	0.030176	0.077331	0.983179	1491	3	0.21787
FAM49B	3	0.95895	0.95922	1	18172	0	0.10091	0.030181	0.075757	0.981504	1492	1	0.10091
SLC17A6	4	0.93054	0.93067	1	17605	0	0.19226	0.030186	0.077351	0.983179	1493	3	0.19226
BTK	4	0.37965	0.52289	1	9753	1	0.2255	0.030235	0.077457	0.983875	1494	3	0.2255
SAA2-SAA4	4	0.59833	0.64796	1	12154	1	0.011804	0.030265	0.077528	0.984106	1495	1	0.011804
ST3GAL3	4	0.73328	0.7402	1	13873	1	0.48611	0.030353	0.07771	0.984202	1496	3	0.48611
UBE4B	4	0.88725	0.88721	1	16770	0	0.33651	0.030381	0.077779	0.984202	1497	3	0.33651
BABAM1	4	0.10531	0.22402	0.991872	4262	3	-0.38052	0.030419	0.077859	0.984202	1498	1	-0.38052
PEA15	4	0.067808	0.15427	0.980196	2972	2	-0.46921	0.03047	0.077964	0.984202	1499	1	-0.46921
RHBDD1	4	0.70594	0.71907	1	13452	1	0.21917	0.030489	0.077999	0.984202	1500	3	0.21917
EFCAB11	4	0.090064	0.19639	0.986491	3748	3	-0.25018	0.030521	0.078071	0.984202	1501	1	-0.25018
AGRP	4	0.42598	0.55927	1	10457	1	0.32133	0.030525	0.078078	0.984202	1502	3	0.32133
ERN1	3	0.94767	0.94793	1	17939	0	0.22489	0.030532	0.076515	0.981504	1503	2	0.22489
RHOQ	4	0.10697	0.22701	0.991872	4322	2	0.3599	0.030565	0.078159	0.984202	1504	2	0.3599
FAM20A	4	0.096984	0.20913	0.988201	4002	1	0.42887	0.03057	0.078171	0.984202	1505	3	0.42887
SYT15	4	0.62829	0.66625	1	12482	1	0.36384	0.030573	0.078174	0.984202	1506	2	0.36384
NTPCR	4	0.75813	0.76096	1	14280	1	0.33173	0.030592	0.078214	0.984202	1507	3	0.33173
LCAT	4	0.33461	0.4745	1	8884	1	0.26367	0.030626	0.078302	0.984202	1508	2	0.26367
TRIM5	4	0.77765	0.77835	1	14619	1	0.10577	0.030636	0.078321	0.984202	1509	2	0.10577
UBE2J1	4	0.98491	0.98491	1	18682	0	0.38552	0.030673	0.078402	0.984202	1510	3	0.38552
GUCA2A	4	0.14308	0.26829	0.991872	5103	2	-0.1085	0.030676	0.078407	0.984202	1511	2	-0.1085
KRTAP5-7	4	0.28781	0.42424	1	7976	2	-0.16145	0.030778	0.078619	0.985602	1512	1	-0.16145
MAGEB3	4	0.69982	0.71466	1	13360	1	0.090633	0.03083	0.07872	0.985602	1513	1	0.090633
APOBR	4	0.92312	0.9233	1	17453	0	0.25576	0.030836	0.078736	0.985602	1514	3	0.25576
C11orf94	4	0.089953	0.19619	0.986491	3744	1	0.19124	0.030853	0.078766	0.985602	1515	3	0.19124
PASK	4	0.59543	0.64622	1	12124	1	0.22389	0.030858	0.07878	0.985602	1516	3	0.22389
DAPP1	4	0.78318	0.78362	1	14730	1	0.15629	0.030881	0.078832	0.985612	1517	2	0.15629
KCNJ9	4	0.80511	0.80504	1	15149	0	0.1123	0.030984	0.079068	0.986707	1518	2	0.1123
KIAA1211L	4	0.10697	0.22701	0.991872	4323	1	0.22773	0.030995	0.079092	0.986707	1519	3	0.22773
PLEKHD1	4	0.9344	0.93451	1	17681	0	0.41255	0.031	0.079102	0.986707	1520	3	0.41255
QTRT1	4	0.96215	0.96217	1	18235	0	0.35484	0.031053	0.079212	0.986707	1521	2	0.35484
DEFB124	4	0.11443	0.23721	0.991872	4510	1	0.18211	0.031055	0.079216	0.986707	1522	3	0.18211
XRCC6BP1	4	0.512	0.60052	1	11225	1	0.27449	0.031063	0.07923	0.986707	1523	2	0.27449
ADRA1A	4	0.025761	0.069646	0.946996	1394	3	-0.29112	0.031086	0.079291	0.986819	1524	1	-0.29112
DTWD1	4	0.5012	0.59515	1	11110	1	0.058518	0.031189	0.079499	0.988556	1525	1	0.058518
CS	4	0.73885	0.74464	1	13965	1	0.71488	0.031209	0.079534	0.988556	1526	3	0.71488
SNIP1	4	0.77212	0.77334	1	14517	1	0.29767	0.031268	0.079667	0.988746	1527	2	0.29767
PI4KB	4	0.45371	0.57201	1	10681	1	0.15365	0.031288	0.079701	0.988746	1528	2	0.15365
MLF2	4	0.90662	0.90662	1	17147	0	0.18557	0.031291	0.079704	0.988746	1529	3	0.18557
BEST2	4	0.093909	0.20352	0.986491	3886	2	-0.04322	0.031401	0.079924	0.989254	1530	2	-0.04322
IZUMO1R	4	0.61125	0.65572	1	12308	1	-0.02224	0.031445	0.080019	0.989254	1531	1	-0.02224
LYRM2	4	0.46919	0.57937	1	10821	1	0.48213	0.031501	0.080126	0.989254	1532	3	0.48213
CRIPAK	4	0.56696	0.62977	1	11787	1	0.2577	0.031504	0.080132	0.989254	1533	3	0.2577
GEMIN2	4	0.97302	0.97317	1	18451	0	0.83367	0.031548	0.080225	0.989254	1534	2	0.83367
SLC4A2	4	0.70698	0.71988	1	13464	1	-0.0048068	0.031599	0.080324	0.989254	1535	2	-0.0048068
RPL9	2	0.47273	0.4763	1	10853	1	0.81575	0.031609	0.057667	0.958116	1536	1	0.81575
VPS26A	4	0.97594	0.97613	1	18517	0	0.29728	0.031633	0.080385	0.989254	1537	3	0.29728
SLC6A1	4	0.84694	0.84681	1	15978	0	0.27258	0.031644	0.080407	0.989254	1538	3	0.27258
MBTPS1	4	0.68203	0.70193	1	13136	1	0.61765	0.031667	0.080452	0.989254	1539	3	0.61765
WISP1	4	0.92544	0.92559	1	17504	0	0.20406	0.031678	0.080483	0.989254	1540	2	0.20406
ASAP1	4	0.85499	0.85487	1	16148	0	0.37605	0.031733	0.080583	0.989254	1541	3	0.37605
FLT3	4	0.98455	0.98454	1	18669	0	0.25427	0.03175	0.080614	0.989254	1542	3	0.25427
LONRF3	4	0.36907	0.5116	1	9560	2	-0.050091	0.031753	0.080624	0.989254	1543	1	-0.050091
URM1	3	0.44402	0.49549	1	10598	1	0.73453	0.031761	0.078411	0.984202	1544	2	0.73453
INSIG1	4	0.92079	0.92091	1	17411	0	0.44159	0.0318	0.080712	0.989254	1545	3	0.44159
CHMP7	4	0.33247	0.4722	1	8842	1	0.32437	0.031805	0.080723	0.989254	1546	3	0.32437
SNAP29	4	0.66833	0.69235	1	12956	1	0.3968	0.031855	0.080824	0.989254	1547	3	0.3968
ADGRE5	4	0.64538	0.67715	1	12684	1	0.3305	0.031856	0.080825	0.989254	1548	3	0.3305
RNASE13	4	0.67609	0.69776	1	13056	1	0.35382	0.031894	0.080909	0.989254	1549	3	0.35382
LOXL1	4	0.77743	0.77815	1	14615	1	0.14246	0.031915	0.080945	0.989254	1550	2	0.14246
PIGV	4	0.78727	0.78751	1	14800	1	0.31551	0.031917	0.080953	0.989254	1551	3	0.31551
UBE2Q1	4	0.9132	0.9132	1	17266	0	0.72631	0.031939	0.080996	0.989254	1552	3	0.72631
GJA5	4	0.13141	0.2556	0.991872	4847	2	-0.17865	0.031958	0.08104	0.989254	1553	1	-0.17865
SLAMF6	4	0.29142	0.42813	1	8045	2	-0.10486	0.03201	0.08115	0.989711	1554	1	-0.10486
ADGRF1	4	0.16025	0.28694	0.996566	5448	1	0.29545	0.032095	0.081332	0.989711	1555	3	0.29545
PKN3	4	0.66021	0.68693	1	12852	1	0.21526	0.032112	0.081362	0.989711	1556	3	0.21526
FCHO2	4	0.21655	0.3478	0.997	6587	2	-0.20545	0.032112	0.081366	0.989711	1557	1	-0.20545
GFRA2	4	0.81146	0.81139	1	15280	0	0.32857	0.032122	0.081388	0.989711	1558	3	0.32857
JMJD8	4	0.65309	0.68219	1	12770	1	0.26701	0.032263	0.081706	0.991248	1559	3	0.26701
CT45A3	4	0.86017	0.86001	1	16244	0	0.11165	0.032266	0.08171	0.991248	1560	2	0.11165
PRPF4B	4	0.82839	0.82837	1	15613	0	0.30976	0.032269	0.081714	0.991248	1561	3	0.30976
PELO	4	0.18383	0.31242	0.996566	5936	1	0.15751	0.032299	0.081794	0.991248	1562	2	0.15751
SPTY2D1	4	0.784	0.7844	1	14746	1	0.095928	0.032317	0.081835	0.991248	1563	2	0.095928
CDC42EP1	4	0.98921	0.98919	1	18766	0	0.27742	0.032336	0.081873	0.991248	1564	3	0.27742
F11	4	0.051757	0.12288	0.972335	2381	1	0.33936	0.032369	0.081939	0.991248	1565	3	0.33936
MFAP1	4	0.42573	0.55916	1	10454	1	0.62924	0.032375	0.08195	0.991248	1566	3	0.62924
DHRS12	4	0.0033332	0.011766	0.851321	258	1	0.21318	0.03242	0.082033	0.991248	1567	2	0.21318
MBD3L3	4	0.72567	0.73427	1	13751	1	0.3798	0.03242	0.082033	0.991248	1568	3	0.3798
KIAA1324	4	0.25654	0.39068	1	7397	1	0.086558	0.032454	0.082105	0.991391	1569	2	0.086558
ZNF132	4	0.98106	0.98108	1	18604	0	0.24612	0.032471	0.082149	0.991391	1570	3	0.24612
NAGPA	4	0.90605	0.90607	1	17136	0	0.2253	0.032524	0.08226	0.992102	1571	3	0.2253
RAB19	4	0.56682	0.62969	1	11785	1	0.25312	0.032668	0.08256	0.992602	1572	3	0.25312
TTC24	4	0.30825	0.44612	1	8361	2	-0.22112	0.032676	0.082576	0.992602	1573	1	-0.22112
STMN1	4	0.98545	0.98543	1	18695	0	0.25638	0.032708	0.082657	0.992602	1574	3	0.25638
OPN4	4	0.98494	0.98493	1	18683	0	0.33776	0.03273	0.082709	0.992602	1575	3	0.33776
MBD2	4	0.67128	0.6944	1	12994	1	0.17909	0.032767	0.082789	0.992602	1576	2	0.17909
PARD3B	4	0.79614	0.7961	1	14975	1	0.23051	0.032776	0.082807	0.992602	1577	3	0.23051
LGALS2	4	0.45794	0.57403	1	10714	1	0.29258	0.03283	0.082917	0.992602	1578	2	0.29258
NEU1	4	2.6278e-05	0.00010391	0.152704	13	3	-0.3372	0.03283	0.082918	0.992602	1579	1	-0.3372
ATAD3B	4	0.93218	0.9323	1	17643	0	0.51548	0.032838	0.08293	0.992602	1580	3	0.51548
DGAT2L6	4	0.97537	0.97555	1	18504	0	0.25996	0.032849	0.082949	0.992602	1581	3	0.25996
DFNB31	3	0.89831	0.89843	1	16999	0	0.40137	0.03286	0.079998	0.989254	1582	2	0.40137
EHHADH	4	0.025325	0.068752	0.946996	1368	2	0.10887	0.032872	0.082998	0.992602	1583	2	0.10887
SPI1	4	0.77753	0.77825	1	14617	1	0.28195	0.032872	0.082999	0.992602	1584	3	0.28195
INSL4	4	0.91529	0.91535	1	17309	0	0.21401	0.032906	0.083081	0.992602	1585	3	0.21401
ZNF490	4	0.047061	0.11345	0.97065	2218	2	-0.00032487	0.032933	0.083146	0.992602	1586	2	-0.00032487
EVA1B	3	0.39892	0.46646	1	10170	1	0.53951	0.032967	0.080148	0.989254	1587	2	0.53951
PCDHGA5	4	0.51157	0.6003	1	11215	1	0.032881	0.032984	0.083254	0.992602	1588	1	0.032881
NXN	4	0.4049	0.54993	1	10278	1	0.30104	0.033008	0.083297	0.992602	1589	2	0.30104
ZCCHC24	4	0.92228	0.92244	1	17441	0	0.2043	0.033035	0.083357	0.992602	1590	3	0.2043
TRMT112	4	0.9579	0.95793	1	18152	0	0.70134	0.033037	0.083361	0.992602	1591	3	0.70134
LZTS3	4	0.50654	0.59779	1	11168	1	0.32854	0.033039	0.083366	0.992602	1592	3	0.32854
TTC39B	4	0.47829	0.58383	1	10905	1	0.26747	0.03306	0.083404	0.992602	1593	3	0.26747
SCAND1	4	0.88997	0.88992	1	16840	0	0.30498	0.033134	0.083565	0.992602	1594	3	0.30498
ACSF3	4	0.02388	0.065726	0.946996	1312	1	0.19923	0.033162	0.083626	0.992602	1595	3	0.19923
C19orf68	4	0.89672	0.89666	1	16973	0	0.25845	0.033219	0.083748	0.992602	1596	3	0.25845
ZFP69	4	0.42681	0.55964	1	10465	1	0.33116	0.033225	0.083755	0.992602	1597	3	0.33116
HHLA3	4	0.23257	0.36494	0.997246	6950	2	-0.021719	0.03324	0.083783	0.992602	1598	1	-0.021719
SLC9A8	4	0.70836	0.72089	1	13486	1	0.20906	0.033271	0.083856	0.992602	1599	3	0.20906
PMS2	4	0.37532	0.5183	1	9675	2	-0.059411	0.033291	0.083907	0.992602	1600	1	-0.059411
OR2L3	4	0.56578	0.62912	1	11771	1	0.38648	0.033305	0.083933	0.992602	1601	3	0.38648
FBXO9	4	0.20163	0.33158	0.997	6277	2	-0.15125	0.033343	0.084018	0.992602	1602	1	-0.15125
RAB9A	4	0.29402	0.43084	1	8084	1	0.096626	0.033344	0.084021	0.992602	1603	2	0.096626
MRPL41	3	0.66098	0.66274	1	12865	1	-0.079108	0.033344	0.080698	0.989254	1604	1	-0.079108
TRIOBP	4	0.83618	0.83617	1	15769	0	0.23182	0.033345	0.084023	0.992602	1605	3	0.23182
ZNF302	4	0.23272	0.36509	0.997246	6954	2	-0.091829	0.033394	0.084129	0.992602	1606	1	-0.091829
DNAJC3	4	0.083423	0.184	0.984385	3512	1	0.26188	0.033396	0.084136	0.992602	1607	3	0.26188
PIK3C2A	4	0.45224	0.57132	1	10672	1	0.3408	0.033442	0.084231	0.992602	1608	3	0.3408
SLC10A1	4	0.51561	0.60236	1	11265	1	0.23684	0.033477	0.084306	0.992602	1609	3	0.23684
MICAL1	4	0.16638	0.29362	0.996566	5570	2	-0.14716	0.033496	0.084347	0.992602	1610	1	-0.14716
HIST1H3D	4	0.3117	0.44992	1	8424	1	0.41954	0.033513	0.084379	0.992602	1611	3	0.41954
SPATA3	4	0.75296	0.75659	1	14192	1	0.26976	0.033545	0.084443	0.992734	1612	3	0.26976
GALNT15	4	0.10934	0.23127	0.991872	4410	1	-0.12978	0.03365	0.084651	0.994261	1613	1	-0.12978
PVRL2	4	0.0058852	0.020238	0.866756	432	2	-0.075723	0.033671	0.084689	0.994261	1614	2	-0.075723
BLOC1S1	4	0.010653	0.035507	0.926721	723	2	-0.66244	0.033701	0.084754	0.994261	1615	1	-0.66244
FNTB	3	0.14686	0.24098	0.991872	5183	2	-0.88989	0.033729	0.081271	0.989711	1616	1	-0.88989
GPR12	4	0.12385	0.24739	0.991872	4695	1	0.2276	0.033745	0.08484	0.994261	1617	2	0.2276
PRR20C	4	0.41244	0.55324	1	10339	1	0.35423	0.033752	0.084861	0.994261	1618	3	0.35423
OR1I1	4	0.54564	0.61809	1	11562	1	0.25465	0.033787	0.084936	0.994261	1619	2	0.25465
CMKLR1	4	0.91862	0.91867	1	17365	0	0.28693	0.033805	0.084963	0.994261	1620	3	0.28693
SLC16A13	4	0.96893	0.96898	1	18372	0	0.26115	0.033816	0.084989	0.994261	1621	3	0.26115
ARHGAP5	4	0.5027	0.59589	1	11129	1	0.095869	0.033906	0.085177	0.995846	1622	1	0.095869
GTF3C5	4	0.81834	0.8183	1	15416	0	0.59893	0.033957	0.085298	0.996654	1623	3	0.59893
GIGYF2	4	0.3673	0.50967	1	9526	2	0.029984	0.034009	0.085411	0.997017	1624	2	0.029984
NCF2	4	0.88402	0.884	1	16709	0	0.21962	0.034036	0.085472	0.997017	1625	3	0.21962
ADAMTS2	4	0.3308	0.47041	1	8814	1	0.009018	0.03406	0.085525	0.997017	1626	1	0.009018
RPS27	2	0.96591	0.96604	1	18310	0	1.1941	0.034094	0.061992	0.967542	1627	2	1.1941
HIST1H4I	4	0.018457	0.054094	0.931315	1098	2	-0.061582	0.034111	0.085638	0.997017	1628	2	-0.061582
CCNA1	4	0.3735	0.51634	1	9647	2	-0.14816	0.034162	0.085747	0.997017	1629	1	-0.14816
TKFC	4	0.81765	0.81761	1	15401	0	0.32376	0.03418	0.085791	0.997017	1630	3	0.32376
TP53INP1	4	0.55097	0.62098	1	11604	1	0.19659	0.034265	0.085959	0.997017	1631	2	0.19659
FGF16	4	0.92244	0.9226	1	17443	0	0.32242	0.034297	0.086021	0.997017	1632	3	0.32242
MYL10	4	0.68152	0.70157	1	13132	1	0.29113	0.034308	0.086045	0.997017	1633	2	0.29113
GABARAPL2	4	0.87598	0.87597	1	16547	0	0.23929	0.034315	0.08606	0.997017	1634	3	0.23929
ZNF48	4	0.55774	0.6247	1	11676	1	0.19634	0.034404	0.086257	0.997017	1635	2	0.19634
LRSAM1	4	0.2161	0.3473	0.997	6578	2	-0.14593	0.034418	0.086286	0.997017	1636	1	-0.14593
CHST10	4	0.013678	0.043477	0.926721	879	3	-0.54415	0.034469	0.086389	0.997017	1637	1	-0.54415
ASB15	4	0.87979	0.8798	1	16630	0	0.23007	0.034489	0.086431	0.997017	1638	3	0.23007
MYOM1	4	0.48965	0.58936	1	11003	1	0.15019	0.034513	0.086477	0.997017	1639	3	0.15019
TRMT2A	4	0.034623	0.088183	0.961009	1747	1	0.24642	0.03453	0.086509	0.997017	1640	3	0.24642
FBXO44	4	0.7149	0.7258	1	13579	1	0.28522	0.034596	0.086633	0.997017	1641	3	0.28522
SIAH3	4	0.97636	0.97656	1	18528	0	0.27846	0.034607	0.08665	0.997017	1642	3	0.27846
ATP10A	4	0.42386	0.55835	1	10436	1	0.22144	0.034623	0.08668	0.997017	1643	2	0.22144
CDC42BPB	4	0.92624	0.92641	1	17516	0	0.32019	0.034659	0.086753	0.997017	1644	3	0.32019
F8A2	4	0.82228	0.82225	1	15496	0	0.24328	0.034674	0.086783	0.997017	1645	2	0.24328
ZAR1L	4	0.88129	0.88125	1	16662	0	0.37638	0.034683	0.086794	0.997017	1646	3	0.37638
LRG1	4	0.97569	0.97587	1	18511	0	0.28927	0.034689	0.086809	0.997017	1647	3	0.28927
LPAR3	4	0.65537	0.68371	1	12795	1	0.20808	0.034693	0.086815	0.997017	1648	2	0.20808
HAS2	4	0.85158	0.85144	1	16064	0	0.3571	0.0347	0.086834	0.997017	1649	3	0.3571
TMEM38A	4	0.86839	0.86831	1	16394	0	0.17996	0.034736	0.086915	0.997017	1650	2	0.17996
CRBN	4	0.86028	0.86012	1	16247	0	0.18628	0.034741	0.086928	0.997017	1651	3	0.18628
TPSB2	4	0.093425	0.20264	0.986491	3868	1	0.25381	0.034771	0.086986	0.997017	1652	3	0.25381
C11orf96	4	0.63537	0.67068	1	12563	1	0.10049	0.034776	0.086995	0.997017	1653	2	0.10049
FEZ1	4	0.92843	0.9286	1	17563	0	0.18968	0.034794	0.087038	0.997017	1654	3	0.18968
GPR27	4	0.98762	0.9876	1	18738	0	0.27	0.034818	0.087086	0.997017	1655	3	0.27
ATXN7L3	4	0.12494	0.24857	0.991872	4721	1	0.38891	0.034821	0.087093	0.997017	1656	3	0.38891
GNB5	4	0.9146	0.91466	1	17297	0	0.34804	0.034843	0.087138	0.997017	1657	2	0.34804
DCAF8	4	0.98791	0.98791	1	18745	0	0.22178	0.034859	0.087168	0.997017	1658	3	0.22178
PCID2	4	0.96947	0.96953	1	18384	0	1.0737	0.034947	0.087351	0.997017	1659	3	1.0737
ZNF438	4	0.20759	0.33811	0.997	6404	2	-0.045545	0.034981	0.08742	0.997017	1660	2	-0.045545
BICD2	4	0.75046	0.75439	1	14139	1	0.35076	0.034993	0.087448	0.997017	1661	2	0.35076
POP7	4	0.35573	0.49719	1	9298	2	0.062431	0.035032	0.08753	0.997017	1662	2	0.062431
PODNL1	4	0.95744	0.95746	1	18145	0	0.30063	0.035065	0.08761	0.997017	1663	3	0.30063
ABCB10	4	0.66692	0.69142	1	12938	1	0.26484	0.035071	0.087619	0.997017	1664	3	0.26484
SPNS2	4	0.98519	0.98519	1	18689	0	0.34659	0.035083	0.087644	0.997017	1665	3	0.34659
GUCY2F	4	0.061567	0.14211	0.972813	2762	1	0.27629	0.035112	0.087709	0.997017	1666	3	0.27629
HCAR2	4	0.55022	0.62056	1	11597	1	0.18981	0.035118	0.087721	0.997017	1667	3	0.18981
SAFB2	4	0.43702	0.56425	1	10545	1	0.39301	0.035122	0.08773	0.997017	1668	2	0.39301
PDXK	4	0.78775	0.78797	1	14808	1	0.36722	0.035144	0.087785	0.997054	1669	2	0.36722
SLFN12L	4	0.28044	0.41639	1	7838	1	0.01583	0.035186	0.087875	0.99738	1670	1	0.01583
FOXI1	4	0.6914	0.70856	1	13249	1	-0.020557	0.035237	0.087991	0.99738	1671	1	-0.020557
MOB2	4	0.52337	0.60639	1	11339	1	0.33948	0.035248	0.088014	0.99738	1672	3	0.33948
PXDC1	4	0.94716	0.94723	1	17928	0	0.19079	0.035273	0.088076	0.99738	1673	2	0.19079
VNN1	4	0.4267	0.55959	1	10464	1	0.07249	0.035288	0.088104	0.99738	1674	2	0.07249
DNAH3	4	0.080664	0.17879	0.983697	3419	3	-0.19598	0.035339	0.088202	0.99738	1675	1	-0.19598
C4BPB	4	0.90407	0.90408	1	17095	0	0.19244	0.035384	0.088307	0.99738	1676	3	0.19244
FGFRL1	4	0.72363	0.73267	1	13724	1	0.052401	0.035442	0.088421	0.99738	1677	2	0.052401
DYNLRB1	3	0.91582	0.91586	1	17317	0	1.3981	0.035443	0.083766	0.992602	1678	2	1.3981
MTF2	4	0.9752	0.97538	1	18498	0	0.33263	0.035444	0.088427	0.99738	1679	3	0.33263
CARKD	4	0.926	0.92616	1	17510	0	0.25466	0.035446	0.088434	0.99738	1680	2	0.25466
TSPO2	4	0.98795	0.98795	1	18746	0	0.20371	0.035462	0.088464	0.99738	1681	3	0.20371
MRPS33	4	0.37408	0.517	1	9659	1	0.35952	0.035468	0.088476	0.99738	1682	2	0.35952
COX7A2	4	0.40329	0.54828	1	10245	1	0.14952	0.035479	0.088492	0.99738	1683	2	0.14952
PHC2	3	0.49226	0.52835	1	11022	1	0.47126	0.035479	0.083822	0.992602	1684	2	0.47126
JSRP1	4	0.81669	0.81665	1	15381	0	0.33576	0.035545	0.088624	0.998113	1685	3	0.33576
SLC3A1	4	0.43859	0.56496	1	10560	1	0.26612	0.035565	0.088662	0.998113	1686	2	0.26612
SFTPD	4	0.97434	0.97448	1	18478	0	0.19391	0.035595	0.088718	0.998136	1687	3	0.19391
TEX26	4	0.1461	0.27154	0.991872	5167	1	0.29245	0.035652	0.088829	0.998136	1688	3	0.29245
GPR119	4	0.22981	0.362	0.997246	6884	1	0.16893	0.035674	0.088882	0.998136	1689	2	0.16893
CCDC64	4	0.96696	0.967	1	18329	0	0.29917	0.035688	0.088905	0.998136	1690	3	0.29917
POMC	4	0.0060806	0.02092	0.866756	449	2	-0.21921	0.035697	0.088925	0.998136	1691	1	-0.21921
LIN9	3	0.10195	0.18086	0.983697	4164	2	-0.26966	0.035731	0.084185	0.992602	1692	1	-0.26966
SCNN1G	4	0.023054	0.06395	0.946996	1274	1	0.19059	0.035749	0.089026	0.998204	1693	2	0.19059
MYOZ1	4	0.81141	0.81135	1	15277	0	0.26062	0.035783	0.089091	0.998204	1694	3	0.26062
URGCP	4	0.96125	0.96125	1	18218	0	0.362	0.035793	0.089115	0.998204	1695	2	0.362
FDFT1	4	0.83803	0.83795	1	15809	0	0.25466	0.035825	0.08918	0.998204	1696	2	0.25466
ANGPT1	4	0.40225	0.54719	1	10227	2	0.054052	0.035851	0.089227	0.998204	1697	2	0.054052
MSRB3	4	0.91533	0.9154	1	17311	0	0.22833	0.035902	0.089334	0.998204	1698	2	0.22833
PRKAG2	4	0.83966	0.83957	1	15844	0	-0.051339	0.035902	0.089335	0.998204	1699	1	-0.051339
HBZ	4	0.51304	0.60104	1	11236	1	0.20878	0.035933	0.089412	0.998204	1700	3	0.20878
OSBP2	4	0.20078	0.33067	0.997	6255	2	-0.0043678	0.035953	0.089449	0.998204	1701	2	-0.0043678
GSG1L	4	0.1869	0.31574	0.996831	5995	2	0.061619	0.035967	0.089477	0.998204	1702	2	0.061619
RNF34	4	0.9739	0.97404	1	18468	0	0.37607	0.035993	0.089527	0.998204	1703	3	0.37607
POLRMT	2	0.72061	0.72036	1	13671	0	0.36645	0.036052	0.065379	0.967542	1704	1	0.36645
MKNK1	4	0.39697	0.54149	1	10125	2	0.14382	0.036076	0.089707	0.998204	1705	2	0.14382
RAB8B	4	0.070112	0.15869	0.981917	3050	2	-0.15755	0.036106	0.089772	0.998204	1706	1	-0.15755
C17orf62	4	0.81527	0.81522	1	15359	0	0.26502	0.036197	0.089961	0.998204	1707	3	0.26502
FAM96A	4	0.72281	0.73202	1	13708	1	0.17786	0.036239	0.090055	0.998204	1708	2	0.17786
RPL36A	4	0.85607	0.85598	1	16168	0	0.32473	0.036269	0.090116	0.998204	1709	3	0.32473
MFNG	4	0.75997	0.76258	1	14311	1	0.27465	0.0363	0.090174	0.998204	1710	3	0.27465
PKMYT1	4	0.33115	0.47077	1	8820	1	0.77281	0.036306	0.090184	0.998204	1711	3	0.77281
FAM98C	4	0.75109	0.75494	1	14152	1	0.19181	0.036338	0.090242	0.998204	1712	2	0.19181
KCNK15	4	0.97889	0.97903	1	18565	0	0.30297	0.036366	0.090303	0.998204	1713	3	0.30297
TP53TG3B	4	0.64223	0.67511	1	12638	1	0.43202	0.036402	0.09038	0.998204	1714	3	0.43202
HIPK2	4	0.043651	0.10666	0.97065	2073	1	0.24357	0.036413	0.090407	0.998204	1715	2	0.24357
CTXN3	4	0.9879	0.9879	1	18744	0	0.36992	0.036414	0.090408	0.998204	1716	3	0.36992
ANKRD6	4	0.98315	0.98316	1	18642	0	0.27744	0.036425	0.090434	0.998204	1717	2	0.27744
PLCE1	4	0.39015	0.5341	1	9968	2	0.12558	0.036436	0.09046	0.998204	1718	2	0.12558
LHX4	4	0.82835	0.82832	1	15610	0	0.27986	0.036464	0.090521	0.998204	1719	2	0.27986
PLA2G4A	4	0.7376	0.74363	1	13947	1	0.14203	0.036491	0.090582	0.998204	1720	2	0.14203
CCDC106	4	0.16856	0.29595	0.996566	5623	1	0.26692	0.036502	0.090607	0.998204	1721	2	0.26692
SPATA19	4	0.41516	0.55446	1	10363	1	0.14444	0.036515	0.090637	0.998204	1722	2	0.14444
ZSWIM2	4	0.83997	0.83987	1	15852	0	0.18236	0.036517	0.090639	0.998204	1723	3	0.18236
OR10H2	4	0.49801	0.59356	1	11071	1	0.13465	0.036535	0.090673	0.998204	1724	2	0.13465
NELFB	4	0.39118	0.53522	1	9991	2	-0.00011893	0.036592	0.090804	0.998204	1725	1	-0.00011893
RBMX	4	0.87772	0.87769	1	16580	0	0.038307	0.036592	0.090804	0.998204	1726	1	0.038307
POMGNT2	4	0.30465	0.44225	1	8286	1	0.36025	0.036608	0.090837	0.998204	1727	3	0.36025
HSD17B6	4	0.41551	0.55461	1	10367	1	0.13261	0.036611	0.090844	0.998204	1728	2	0.13261
ISYNA1	4	0.98872	0.98872	1	18759	0	0.47817	0.036622	0.090865	0.998204	1729	3	0.47817
C12orf56	4	0.075024	0.16804	0.983592	3201	2	-0.28949	0.036669	0.090949	0.998521	1730	1	-0.28949
MAST2	4	0.50568	0.59734	1	11158	1	0.18687	0.036729	0.091062	0.998521	1731	3	0.18687
MIF4GD	4	0.86019	0.86004	1	16245	0	0.29413	0.036732	0.091068	0.998521	1732	3	0.29413
MDGA1	4	0.84893	0.84882	1	16018	0	0.088596	0.036765	0.091144	0.998521	1733	2	0.088596
FHOD1	4	0.14988	0.27564	0.991872	5256	2	-0.13234	0.036771	0.091155	0.998521	1734	1	-0.13234
TAF6	1	0.96322	0.96346	1	18256	0	1.251	0.036783	0.036687	0.90414	1735	1	1.251
SMIM10L1	4	0.31906	0.45779	1	8569	1	0.40373	0.036851	0.091333	0.9991	1736	3	0.40373
FAM167A	4	0.1395	0.26443	0.991872	5023	2	0.087493	0.036853	0.091335	0.9991	1737	2	0.087493
PGD	4	0.25343	0.38731	1	7348	2	0.13356	0.036873	0.09137	0.9991	1738	2	0.13356
SNX16	4	0.80535	0.80528	1	15157	0	-0.03517	0.036924	0.091479	0.9991	1739	1	-0.03517
GAN	4	0.29489	0.43176	1	8097	2	0.17521	0.037117	0.091872	0.9991	1740	2	0.17521
CPNE1	4	0.78645	0.78675	1	14784	1	0.24518	0.037125	0.091888	0.9991	1741	3	0.24518
S100PBP	4	0.80869	0.8086	1	15226	0	-0.14496	0.037129	0.091896	0.9991	1742	1	-0.14496
PCDHB8	4	0.16719	0.29444	0.996566	5589	1	0.13944	0.037161	0.091973	0.9991	1743	2	0.13944
TSC22D2	4	0.93661	0.93669	1	17729	0	0.31779	0.037174	0.092006	0.9991	1744	3	0.31779
KCNA3	4	0.26717	0.40209	1	7597	2	-0.12671	0.03718	0.092019	0.9991	1745	1	-0.12671
IL17RC	4	0.67892	0.69975	1	13095	1	0.32825	0.037184	0.09202	0.9991	1746	2	0.32825
HEPACAM	4	0.70602	0.71914	1	13453	1	0.20588	0.037231	0.092131	0.9991	1747	3	0.20588
AGRN	4	0.69431	0.71068	1	13286	1	0.20261	0.03725	0.092178	0.9991	1748	2	0.20261
BFSP1	3	0.96105	0.96134	1	18212	0	0.42795	0.037278	0.086384	0.997017	1749	2	0.42795
COIL	4	0.78239	0.78286	1	14716	1	0.13828	0.037282	0.09224	0.9991	1750	2	0.13828
NTRK3	4	0.81008	0.81003	1	15251	0	0.021259	0.037384	0.09245	0.9991	1751	1	0.021259
CLDN3	4	0.52141	0.60539	1	11317	1	0.32069	0.037388	0.092456	0.9991	1752	3	0.32069
DIP2C	4	0.93232	0.93242	1	17646	0	0.23904	0.037425	0.092525	0.9991	1753	3	0.23904
FAM46C	4	0.75219	0.75594	1	14174	1	0.12152	0.037427	0.092528	0.9991	1754	2	0.12152
CENPQ	4	0.1329	0.25721	0.991872	4885	1	0.241	0.037435	0.092547	0.9991	1755	3	0.241
SNAI2	4	0.041616	0.1025	0.97065	1987	1	-0.00406	0.037486	0.092653	0.9991	1756	1	-0.00406
FAM46A	4	0.4819	0.5856	1	10936	1	0.33942	0.037505	0.092697	0.9991	1757	3	0.33942
TOMM20L	4	0.54378	0.61705	1	11541	1	0.21612	0.03753	0.092739	0.9991	1758	3	0.21612
B3GNTL1	4	0.050925	0.12119	0.972335	2358	2	-0.056509	0.037537	0.092758	0.9991	1759	1	-0.056509
POLE3	4	0.64427	0.67643	1	12664	1	0.23745	0.037588	0.092858	0.9991	1760	2	0.23745
GJB3	4	0.84046	0.84034	1	15863	0	0.25377	0.037622	0.092921	0.9991	1761	3	0.25377
PRKAA2	4	0.23257	0.36494	0.997246	6949	1	0.12769	0.037639	0.092953	0.9991	1762	1	0.12769
TEDDM1	4	0.23123	0.36351	0.997246	6920	1	0.35649	0.037671	0.093014	0.9991	1763	3	0.35649
HSPBP1	4	0.62581	0.6647	1	12459	1	0.12152	0.037741	0.093156	0.9991	1764	2	0.12152
SMAD6	4	0.37464	0.51757	1	9669	1	0.34918	0.037748	0.093166	0.9991	1765	3	0.34918
ADAT3	4	0.88354	0.88351	1	16700	0	0.28027	0.037793	0.093258	0.9991	1766	2	0.28027
C11orf57	4	0.23558	0.36822	0.997529	7005	1	0.69939	0.037826	0.09333	0.9991	1767	3	0.69939
GBX1	4	0.29422	0.43105	1	8086	1	0.21254	0.037844	0.093372	0.9991	1768	2	0.21254
LLGL2	4	0.29017	0.42678	1	8024	1	0.3435	0.037893	0.093468	0.9991	1769	3	0.3435
TFB2M	4	0.28241	0.41848	1	7882	1	0.71208	0.037949	0.093577	0.9991	1770	2	0.71208
NIPAL3	4	0.64011	0.67373	1	12614	1	0.18176	0.037982	0.09364	0.9991	1771	2	0.18176
SPACA5	4	0.95465	0.95468	1	18096	0	0.06612	0.037997	0.093673	0.9991	1772	1	0.06612
PGPEP1L	4	0.78279	0.78327	1	14724	1	0.23171	0.038042	0.09377	0.9991	1773	3	0.23171
IDE	4	0.49908	0.5941	1	11089	1	0.095111	0.038048	0.093782	0.9991	1774	2	0.095111
RLN2	4	0.24707	0.38052	1	7229	1	0.2656	0.038094	0.093866	0.9991	1775	3	0.2656
FAM20B	4	0.84252	0.84238	1	15897	0	0.071113	0.038099	0.093878	0.9991	1776	2	0.071113
OR4A47	4	0.095913	0.20717	0.986681	3969	1	-0.035044	0.03815	0.093996	0.9991	1777	1	-0.035044
AGMAT	3	0.93925	0.93947	1	17777	0	0.10394	0.038153	0.087693	0.997017	1778	1	0.10394
GRAMD1A	4	0.55371	0.62247	1	11631	1	0.26124	0.038183	0.094067	0.9991	1779	3	0.26124
NUP54	4	0.94373	0.94384	1	17865	0	0.40998	0.038198	0.094092	0.9991	1780	3	0.40998
CKMT1B	4	0.94808	0.94815	1	17948	0	0.17119	0.038201	0.094101	0.9991	1781	2	0.17119
CPNE6	4	0.95418	0.95421	1	18083	0	0.42479	0.03826	0.094209	0.9991	1782	3	0.42479
DMGDH	4	0.64925	0.67971	1	12734	1	-0.022801	0.038303	0.094293	0.9991	1783	1	-0.022801
PTN	4	0.69245	0.70934	1	13263	1	0.18123	0.038316	0.094316	0.9991	1784	3	0.18123
RRAGA	4	0.97901	0.97914	1	18569	0	0.40151	0.038322	0.094327	0.9991	1785	3	0.40151
KAT6B	4	0.93178	0.93189	1	17632	0	0.30124	0.038351	0.094387	0.9991	1786	2	0.30124
MCF2	4	0.35723	0.4988	1	9326	1	0.11756	0.038354	0.094392	0.9991	1787	2	0.11756
ADCY6	4	0.98868	0.98868	1	18758	0	0.34377	0.038397	0.094488	0.9991	1788	3	0.34377
EPHB6	4	0.39342	0.53764	1	10037	1	0.25959	0.038428	0.09456	0.9991	1789	3	0.25959
RAB39A	4	0.10233	0.21863	0.990414	4174	1	0.12815	0.038485	0.094674	0.9991	1790	2	0.12815
SMG5	4	0.77052	0.7719	1	14486	1	0.072099	0.038558	0.094825	0.9991	1791	1	0.072099
LOC81691	4	0.8838	0.88378	1	16707	0	0.27972	0.038616	0.094954	0.9991	1792	3	0.27972
PDK3	4	0.81156	0.81149	1	15282	0	-0.0068869	0.03866	0.095049	0.9991	1793	1	-0.0068869
SLC26A9	4	0.60392	0.65131	1	12210	1	0.26197	0.038691	0.09512	0.9991	1794	3	0.26197
OR10R2	4	0.39997	0.54465	1	10189	1	0.12216	0.038711	0.095157	0.9991	1795	2	0.12216
S1PR3	4	0.98474	0.98474	1	18675	0	0.23182	0.038823	0.095393	0.9991	1796	3	0.23182
FOXP2	4	0.4657	0.57768	1	10785	1	0.4671	0.038833	0.095408	0.9991	1797	2	0.4671
DMAP1	4	0.50226	0.59567	1	11123	1	0.49287	0.038839	0.09542	0.9991	1798	3	0.49287
BAGE2	4	0.077005	0.17184	0.983592	3276	2	-0.33567	0.038839	0.09542	0.9991	1799	1	-0.33567
ALAS2	4	0.73643	0.74266	1	13924	1	0.25708	0.03886	0.095471	0.9991	1800	3	0.25708
CLMP	4	0.95477	0.9548	1	18099	0	0.19937	0.038929	0.095622	0.9991	1801	3	0.19937
CDC23	4	0.18713	0.31598	0.996831	5997	2	-0.40094	0.038941	0.095648	0.9991	1802	1	-0.40094
RAD17	4	0.34729	0.48816	1	9124	1	0.51287	0.038941	0.095648	0.9991	1803	2	0.51287
SLC7A14	4	0.30928	0.44726	1	8382	1	0.15581	0.038973	0.095706	0.9991	1804	3	0.15581
EGFL7	4	0.90897	0.90898	1	17192	0	0.21648	0.038992	0.095746	0.9991	1805	3	0.21648
CUL1	4	0.77024	0.77165	1	14480	1	0.30556	0.038999	0.095758	0.9991	1806	3	0.30556
HOXB4	4	0.6904	0.70786	1	13234	1	0.249	0.039013	0.095786	0.9991	1807	2	0.249
LOXL2	4	0.65011	0.68027	1	12743	1	0.2389	0.039024	0.095807	0.9991	1808	3	0.2389
LEUTX	4	0.64077	0.67416	1	12621	1	0.24923	0.039049	0.095859	0.9991	1809	3	0.24923
SEC16B	4	0.96646	0.96651	1	18318	0	0.236	0.039068	0.095908	0.9991	1810	3	0.236
LSMEM1	4	0.98125	0.98128	1	18608	0	0.3138	0.039099	0.095968	0.9991	1811	3	0.3138
SUMF1	4	0.95898	0.959	1	18173	0	0.30405	0.039137	0.096036	0.9991	1812	2	0.30405
TTC9B	4	0.88774	0.88769	1	16777	0	0.28214	0.039194	0.096134	0.9991	1813	3	0.28214
TREML4	4	0.72465	0.73346	1	13736	1	0.25487	0.0392	0.096144	0.9991	1814	3	0.25487
CAMLG	4	0.9521	0.95217	1	18037	0	0.39333	0.039213	0.096171	0.9991	1815	3	0.39333
CPN2	4	0.10044	0.21522	0.989653	4104	1	0.17473	0.039221	0.096185	0.9991	1816	2	0.17473
PRKAR1B	4	0.94376	0.94387	1	17866	0	0.24221	0.039283	0.096322	0.9991	1817	3	0.24221
PTPN2	4	0.98537	0.98536	1	18693	0	0.16852	0.039374	0.096521	0.9991	1818	3	0.16852
CALML4	4	0.17231	0.30003	0.996566	5695	1	0.076826	0.039425	0.096633	0.9991	1819	1	0.076826
FDXACB1	4	0.30264	0.44008	1	8244	1	0.3965	0.039466	0.096725	0.9991	1820	3	0.3965
C1QBP	4	0.98535	0.98534	1	18692	0	0.81484	0.039473	0.096739	0.9991	1821	3	0.81484
NSDHL	4	0.71977	0.72963	1	13648	1	0.076729	0.039476	0.096747	0.9991	1822	2	0.076729
RNASEH2A	4	0.87541	0.8754	1	16535	0	0.36266	0.039498	0.096799	0.9991	1823	3	0.36266
MAGEB6	4	0.66157	0.68781	1	12874	1	0.28121	0.039504	0.096812	0.9991	1824	3	0.28121
ITM2B	4	0.88833	0.88829	1	16794	0	0.060064	0.039527	0.096854	0.9991	1825	1	0.060064
SLC27A3	4	0.61011	0.65503	1	12291	1	0.18011	0.039545	0.096887	0.9991	1826	2	0.18011
LTV1	2	0.95591	0.95601	1	18117	0	1.1645	0.039622	0.07152	0.981504	1827	2	1.1645
TRIAP1	2	0.5836	0.58365	1	12000	0	0.79222	0.039622	0.07152	0.981504	1828	1	0.79222
ATG14	4	0.92647	0.92665	1	17520	0	0.1995	0.039629	0.097077	0.9991	1829	2	0.1995
DMRTC2	4	0.095293	0.20606	0.986491	3946	2	-0.20988	0.03968	0.097184	0.9991	1830	1	-0.20988
NHP2L1	2	0.96026	0.96034	1	18201	0	0.68245	0.039742	0.071735	0.981504	1831	2	0.68245
MRAS	4	0.36508	0.50729	1	9481	1	0.13074	0.039772	0.097373	0.9991	1832	2	0.13074
CSDC2	4	0.95266	0.95272	1	18049	0	0.21978	0.039778	0.097388	0.9991	1833	3	0.21978
SLC5A6	4	0.15027	0.27605	0.991872	5271	2	-0.039076	0.039833	0.097508	0.9991	1834	2	-0.039076
ISOC2	4	0.99019	0.99018	1	18784	0	0.47898	0.039848	0.097533	0.9991	1835	3	0.47898
SNAP47	4	0.6973	0.7128	1	13328	1	0.21753	0.039861	0.097563	0.9991	1836	3	0.21753
ZNF823	4	0.69166	0.70876	1	13253	1	0.24042	0.039896	0.097639	0.9991	1837	3	0.24042
NR1H2	4	0.9692	0.96925	1	18376	0	0.22789	0.039922	0.097697	0.9991	1838	3	0.22789
CNPPD1	4	0.16462	0.29167	0.996566	5534	1	0.052987	0.039935	0.097725	0.9991	1839	2	0.052987
MAML3	4	0.3671	0.50945	1	9518	2	0.10163	0.039954	0.097768	0.9991	1840	2	0.10163
CCDC88B	4	0.12941	0.25343	0.991872	4805	2	-0.37579	0.039986	0.097834	0.9991	1841	1	-0.37579
MB21D2	4	0.57179	0.63246	1	11848	1	0.2148	0.039995	0.097846	0.9991	1842	3	0.2148
LRRC14B	4	0.7029	0.71689	1	13409	1	0.26851	0.039999	0.097853	0.9991	1843	3	0.26851
CD58	4	0.94654	0.94659	1	17917	0	0.33469	0.040088	0.098034	0.9991	1844	3	0.33469
MSRA	4	0.16204	0.28887	0.996566	5486	1	0.29638	0.040113	0.098088	0.9991	1845	3	0.29638
HELQ	4	0.77234	0.77355	1	14521	1	0.283	0.040139	0.098135	0.9991	1846	3	0.283
SLC17A4	4	0.95539	0.95543	1	18110	0	0.16461	0.040155	0.098161	0.9991	1847	3	0.16461
ATP12A	4	0.97537	0.97555	1	18503	0	0.22063	0.040187	0.098227	0.9991	1848	3	0.22063
HTATSF1	4	0.56352	0.6279	1	11744	1	0.58813	0.04019	0.098237	0.9991	1849	2	0.58813
CAPN6	4	0.88655	0.8865	1	16761	0	0.08024	0.040193	0.098242	0.9991	1850	2	0.08024
METTL24	4	0.77441	0.77541	1	14554	1	0.19931	0.040205	0.098257	0.9991	1851	2	0.19931
ABL2	4	0.90683	0.90683	1	17152	0	0.35662	0.040228	0.098305	0.9991	1852	3	0.35662
SERPINA4	4	0.27303	0.40834	1	7704	2	0.057772	0.040241	0.098332	0.9991	1853	2	0.057772
DGKG	4	0.46799	0.57878	1	10807	1	0.26977	0.040277	0.098409	0.9991	1854	3	0.26977
TRAF3IP3	4	0.48414	0.58671	1	10962	1	-0.079545	0.040292	0.09844	0.9991	1855	1	-0.079545
IVD	4	0.59091	0.64358	1	12075	1	0.068894	0.040343	0.098532	0.9991	1856	2	0.068894
ZDHHC17	4	0.20422	0.33438	0.997	6327	1	0.26964	0.040365	0.098573	0.9991	1857	3	0.26964
MSH6	4	0.90878	0.90878	1	17185	0	0.39107	0.040373	0.098595	0.9991	1858	3	0.39107
ACOT6	4	0.77722	0.77797	1	14609	1	0.068477	0.040394	0.098653	0.9991	1859	1	0.068477
CEP41	4	0.40696	0.55082	1	10295	1	0.16691	0.040399	0.098659	0.9991	1860	2	0.16691
CCK	4	0.21403	0.34505	0.997	6545	2	0.048881	0.040433	0.098726	0.9991	1861	2	0.048881
RRAGD	4	0.26884	0.40381	1	7624	2	-0.27574	0.040445	0.098759	0.9991	1862	1	-0.27574
FAM198A	4	0.84933	0.8492	1	16023	0	0.26676	0.040456	0.098785	0.9991	1863	3	0.26676
SS18L2	2	0.95953	0.95963	1	18188	0	0.79562	0.040474	0.072973	0.981504	1864	2	0.79562
HAUS2	4	0.67989	0.70041	1	13112	1	0.45449	0.040509	0.098902	0.9991	1865	3	0.45449
CRLF1	4	0.65813	0.68554	1	12830	1	0.22514	0.040515	0.098914	0.9991	1866	3	0.22514
KTN1	4	0.05027	0.11983	0.972335	2335	2	-0.14583	0.040525	0.098936	0.9991	1867	2	-0.14583
TXNDC9	4	0.072985	0.16421	0.983592	3138	3	-0.22845	0.040598	0.099092	0.9991	1868	1	-0.22845
RERE	4	0.70108	0.71555	1	13380	1	0.31923	0.040625	0.099149	0.9991	1869	3	0.31923
DUS3L	4	0.36244	0.50443	1	9429	2	-0.053092	0.040649	0.099194	0.9991	1870	1	-0.053092
HNRNPA1	4	0.31316	0.4515	1	8458	2	0.093982	0.040663	0.099219	0.9991	1871	2	0.093982
NID1	4	0.86477	0.86468	1	16333	0	0.1684	0.04067	0.099235	0.9991	1872	3	0.1684
WDR81	4	0.9837	0.9837	1	18652	0	0.42991	0.040676	0.099248	0.9991	1873	3	0.42991
HLA-A	4	0.089899	0.19608	0.986491	3743	2	0.076807	0.040697	0.099294	0.9991	1874	2	0.076807
FFAR3	4	0.78869	0.78888	1	14828	1	0.24695	0.0407	0.099301	0.9991	1875	3	0.24695
TMEM222	4	0.97249	0.97264	1	18438	0	0.45307	0.040751	0.099398	0.9991	1876	3	0.45307
SLAMF1	4	0.25667	0.39082	1	7401	1	0.284	0.040754	0.099402	0.9991	1877	3	0.284
THAP3	4	0.89898	0.89894	1	17010	0	0.22574	0.04078	0.09946	0.9991	1878	3	0.22574
NEDD1	3	0.51581	0.54515	1	11269	1	0.4659	0.040795	0.09156	0.9991	1879	2	0.4659
SLC25A36	4	0.14273	0.2679	0.991872	5096	2	0.16981	0.040801	0.099492	0.9991	1880	2	0.16981
SEC24D	4	0.58483	0.64002	1	12013	1	0.23463	0.040832	0.099545	0.9991	1881	3	0.23463
CWH43	4	0.92976	0.92989	1	17589	0	0.24988	0.040846	0.099574	0.9991	1882	2	0.24988
ANKRD16	4	0.97682	0.97701	1	18536	0	0.25754	0.040929	0.099751	0.9991	1883	3	0.25754
CAD	4	0.7698	0.77125	1	14472	1	0.371	0.040939	0.099774	0.9991	1884	3	0.371
TLR3	4	0.81756	0.81752	1	15397	0	0.1924	0.040942	0.09978	0.9991	1885	3	0.1924
C11orf42	4	0.88556	0.88552	1	16741	0	0.19309	0.040973	0.09984	0.9991	1886	2	0.19309
GOLGA8N	4	0.97611	0.97631	1	18520	0	0.40103	0.040985	0.099865	0.9991	1887	2	0.40103
HIRA	4	0.85286	0.85273	1	16099	0	0.6789	0.041065	0.10002	0.9991	1888	3	0.6789
CDK10	4	0.86936	0.86928	1	16410	0	0.22491	0.041085	0.10006	0.9991	1889	3	0.22491
PABPC4L	4	0.36084	0.50272	1	9395	2	0.060512	0.0411	0.1001	0.9991	1890	2	0.060512
DES	4	0.81358	0.81355	1	15324	0	0.26001	0.041158	0.1002	0.9991	1891	2	0.26001
FAM162A	4	0.95271	0.95278	1	18051	0	0.27711	0.041163	0.10021	0.9991	1892	3	0.27711
CCDC144A	4	0.8699	0.86979	1	16421	0	0.36024	0.041169	0.10022	0.9991	1893	3	0.36024
DKK2	4	0.40115	0.54598	1	10207	2	0.13192	0.041209	0.10029	0.9991	1894	2	0.13192
SNAPIN	4	0.97018	0.97024	1	18396	0	0.30496	0.041308	0.10052	0.9991	1895	3	0.30496
WASL	4	0.18825	0.31719	0.996831	6018	2	-0.13011	0.041311	0.10052	0.9991	1896	1	-0.13011
DUSP23	4	0.35485	0.49628	1	9279	1	0.23386	0.041332	0.10057	0.9991	1897	3	0.23386
ACTN4	4	0.96533	0.96538	1	18302	0	0.24451	0.041358	0.10063	0.9991	1898	3	0.24451
AMICA1	4	0.95712	0.95713	1	18139	0	0.18656	0.041371	0.10065	0.9991	1899	3	0.18656
UTS2	4	0.8176	0.81756	1	15400	0	0.39896	0.041377	0.10066	0.9991	1900	3	0.39896
OXA1L	4	0.73054	0.73805	1	13826	1	0.47591	0.041437	0.10079	0.9991	1901	3	0.47591
DHTKD1	4	0.28748	0.42387	1	7972	1	0.32656	0.041469	0.10085	0.9991	1902	3	0.32656
FAM89A	4	0.72112	0.7307	1	13681	1	0.13169	0.041481	0.10088	0.9991	1903	2	0.13169
MRPS31	4	0.98807	0.98807	1	18750	0	0.40032	0.041607	0.10113	0.9991	1904	3	0.40032
RIC8B	4	0.94424	0.94434	1	17875	0	0.13838	0.041616	0.10115	0.9991	1905	2	0.13838
IL31RA	4	0.908	0.908	1	17166	0	0.24438	0.041667	0.10126	0.9991	1906	3	0.24438
PFN2	4	0.47648	0.58293	1	10889	1	0.17472	0.04169	0.1013	0.9991	1907	2	0.17472
YES1	4	0.75711	0.76013	1	14262	1	0.21916	0.041736	0.10141	0.9991	1908	2	0.21916
CENPO	4	0.94747	0.94755	1	17934	0	0.65819	0.041764	0.10147	0.9991	1909	3	0.65819
MRPS16	4	0.50442	0.59674	1	11145	1	0.39408	0.041806	0.10155	0.9991	1910	2	0.39408
ENY2	4	0.61031	0.65516	1	12294	1	0.64148	0.041841	0.10161	0.9991	1911	2	0.64148
C16orf52	4	0.93992	0.94004	1	17792	0	0.19659	0.041864	0.10167	0.9991	1912	2	0.19659
HIGD1A	4	0.26898	0.40398	1	7628	2	-0.054229	0.041871	0.10168	0.9991	1913	1	-0.054229
CD24	4	0.91829	0.91831	1	17359	0	0.21773	0.041899	0.10175	0.9991	1914	2	0.21773
AKT3	4	0.73215	0.73933	1	13849	1	0.18714	0.041922	0.1018	0.9991	1915	2	0.18714
MUM1	4	0.97779	0.97798	1	18546	0	0.37141	0.041968	0.1019	0.9991	1916	3	0.37141
RFC1	3	0.62627	0.63209	1	12466	1	0.40382	0.041974	0.093256	0.9991	1917	2	0.40382
POLE	3	0.77808	0.77828	1	14630	0	-0.17554	0.041989	0.093278	0.9991	1918	1	-0.17554
NUDCD1	4	0.071246	0.16086	0.982643	3083	3	-0.26412	0.042024	0.102	0.9991	1919	1	-0.26412
NLRP3	4	0.47054	0.58002	1	10829	1	0.2653	0.042096	0.10214	0.9991	1920	2	0.2653
TUB	4	0.89231	0.89226	1	16884	0	0.17471	0.04212	0.10219	0.9991	1921	2	0.17471
IL4I1	4	0.11088	0.23335	0.991872	4437	1	0.27317	0.042155	0.10226	0.9991	1922	2	0.27317
FKBP6	4	0.70186	0.71614	1	13398	1	0.18373	0.04219	0.10233	0.9991	1923	2	0.18373
WDR60	4	0.47243	0.58095	1	10848	1	0.25413	0.042212	0.10237	0.9991	1924	3	0.25413
CELF1	4	0.85037	0.85026	1	16040	0	0.28267	0.042213	0.10237	0.9991	1925	2	0.28267
RAP1GAP	4	0.037231	0.093577	0.97004	1834	1	0.071137	0.042227	0.10239	0.9991	1926	2	0.071137
MRPS36	4	0.59469	0.64578	1	12112	1	0.2379	0.042248	0.10244	0.9991	1927	2	0.2379
GTPBP6	4	0.34226	0.48276	1	9028	2	0.041834	0.042271	0.10247	0.9991	1928	2	0.041834
HSPG2	4	0.86775	0.86764	1	16378	0	0.27842	0.042272	0.10247	0.9991	1929	3	0.27842
SYT14	4	0.64123	0.67445	1	12625	1	0.26023	0.042295	0.10253	0.9991	1930	2	0.26023
LHX5	4	0.63938	0.67326	1	12602	1	0.23765	0.042311	0.10257	0.9991	1931	3	0.23765
KDM5D	4	0.8964	0.89636	1	16967	0	0.24558	0.042364	0.10268	0.9991	1932	3	0.24558
CCDC39	4	0.18387	0.31248	0.996566	5938	1	0.068119	0.04238	0.10271	0.9991	1933	1	0.068119
GPI	4	0.79964	0.79959	1	15034	1	0.38749	0.042384	0.10271	0.9991	1934	3	0.38749
SLC25A46	4	0.13295	0.25725	0.991872	4886	1	0.21712	0.042391	0.10272	0.9991	1935	3	0.21712
C8orf31	4	0.15731	0.28379	0.99619	5398	2	-0.20982	0.042431	0.1028	0.9991	1936	1	-0.20982
EML5	4	0.94985	0.94991	1	17988	0	0.21081	0.042505	0.10296	0.9991	1937	3	0.21081
FAM91A1	4	0.30869	0.44659	1	8368	2	-0.13148	0.042517	0.10298	0.9991	1938	2	-0.13148
VWA3B	4	0.81189	0.81183	1	15293	0	0.24848	0.042524	0.103	0.9991	1939	3	0.24848
SMTN	4	0.94474	0.9448	1	17888	0	0.26576	0.042563	0.10309	0.9991	1940	3	0.26576
PTPRZ1	4	0.84022	0.8401	1	15858	0	0.20054	0.042583	0.10313	0.9991	1941	2	0.20054
SH2B2	4	0.91362	0.91364	1	17276	0	0.55064	0.042597	0.10317	0.9991	1942	3	0.55064
LNP1	4	0.7725	0.77368	1	14524	1	0.255	0.04263	0.10324	0.9991	1943	3	0.255
ZNF254	4	0.81681	0.81678	1	15384	0	0.18887	0.042634	0.10324	0.9991	1944	3	0.18887
L3HYPDH	4	0.92515	0.92531	1	17497	0	0.32377	0.042636	0.10325	0.9991	1945	3	0.32377
RAVER2	4	0.36381	0.50594	1	9455	1	0.24518	0.042663	0.10331	0.9991	1946	3	0.24518
IL7	4	0.86746	0.86735	1	16370	0	0.15279	0.042685	0.10336	0.9991	1947	2	0.15279
TSTD2	4	0.84418	0.84407	1	15926	0	0.17906	0.04269	0.10337	0.9991	1948	3	0.17906
CYP4X1	4	0.92781	0.92798	1	17547	0	0.27321	0.04273	0.10345	0.9991	1949	3	0.27321
EFCAB7	4	0.16682	0.29404	0.996566	5581	2	-0.13091	0.042736	0.10346	0.9991	1950	1	-0.13091
KRTAP1-5	4	0.98953	0.9895	1	18774	0	0.17068	0.042736	0.10347	0.9991	1951	3	0.17068
TRAK2	4	0.077847	0.17343	0.983592	3319	1	0.12852	0.04281	0.10361	0.9991	1952	2	0.12852
HAPLN2	4	0.71167	0.72334	1	13533	1	0.13342	0.042838	0.10367	0.9991	1953	2	0.13342
DCTD	4	0.60813	0.65383	1	12268	1	0.22646	0.042883	0.10377	0.9991	1954	3	0.22646
ISCU	4	0.88459	0.88454	1	16728	0	0.29906	0.042888	0.10378	0.9991	1955	1	0.29906
NFE2L1	4	0.72241	0.73169	1	13701	1	0.12922	0.042927	0.10387	0.9991	1956	2	0.12922
GPR180	4	0.00028903	0.00107	0.600371	34	3	-0.41052	0.042939	0.10389	0.9991	1957	1	-0.41052
RUVBL2	4	0.25638	0.39049	1	7393	2	0.30807	0.042945	0.1039	0.9991	1958	2	0.30807
FABP6	4	0.96423	0.96429	1	18276	0	0.19994	0.042956	0.10393	0.9991	1959	3	0.19994
USB1	4	0.93803	0.9381	1	17751	0	0.29563	0.042974	0.10396	0.9991	1960	3	0.29563
CYP27A1	4	0.95701	0.95703	1	18136	0	0.26167	0.042976	0.10396	0.9991	1961	3	0.26167
HADHA	4	0.35501	0.49643	1	9283	2	-0.14044	0.04299	0.10399	0.9991	1962	1	-0.14044
INS-IGF2	4	0.3719	0.51461	1	9610	1	0.3601	0.04303	0.10407	0.9991	1963	3	0.3601
ANGPTL3	4	0.90881	0.90881	1	17187	0	0.10879	0.043092	0.10419	0.9991	1964	2	0.10879
AJUBA	4	0.032317	0.083397	0.953565	1663	1	0.16001	0.043162	0.10434	0.9991	1965	2	0.16001
SCRN1	4	0.3088	0.44671	1	8370	1	0.31429	0.04317	0.10435	0.9991	1966	3	0.31429
SAP18	2	0.95683	0.95692	1	18130	0	0.60805	0.043171	0.077579	0.984106	1967	2	0.60805
TBL2	4	0.83775	0.83768	1	15801	0	0.31006	0.043198	0.10441	0.9991	1968	3	0.31006
TMC8	4	0.85646	0.85638	1	16175	0	0.26701	0.043207	0.10442	0.9991	1969	3	0.26701
DFNA5	4	0.9245	0.92465	1	17485	0	0.27161	0.043233	0.10448	0.9991	1970	2	0.27161
PEX11B	3	0.91105	0.91114	1	17229	0	0.41638	0.043245	0.095125	0.9991	1971	2	0.41638
DGKE	4	0.66394	0.68937	1	12911	1	0.13014	0.043256	0.10454	0.9991	1972	2	0.13014
BPIFA2	4	0.77102	0.77235	1	14492	1	0.17248	0.043264	0.10456	0.9991	1973	3	0.17248
EXOSC4	3	0.083846	0.15634	0.980365	3533	1	0.52303	0.043301	0.095209	0.9991	1974	2	0.52303
PIH1D1	4	0.77558	0.77647	1	14582	1	0.22915	0.043346	0.10472	0.9991	1975	2	0.22915
KIAA1456	4	0.9485	0.94856	1	17959	0	0.16734	0.043397	0.10483	0.9991	1976	2	0.16734
SLC37A1	4	0.98535	0.98534	1	18691	0	0.16992	0.043412	0.10486	0.9991	1977	3	0.16992
CDK5RAP2	4	0.21842	0.34976	0.997	6636	2	-0.090488	0.043448	0.10493	0.9991	1978	1	-0.090488
MRGPRX2	4	0.16188	0.2887	0.996566	5483	2	0.072948	0.043457	0.10495	0.9991	1979	2	0.072948
PRF1	4	0.9582	0.95823	1	18159	0	0.174	0.043499	0.10505	0.9991	1980	2	0.174
CRABP1	4	0.79431	0.79436	1	14944	1	0.22781	0.043553	0.10516	0.9991	1981	3	0.22781
C20orf194	4	0.60935	0.65457	1	12284	1	0.1262	0.0436	0.10527	0.9991	1982	2	0.1262
C10orf91	4	0.97365	0.9738	1	18463	0	0.16414	0.0436	0.10527	0.9991	1983	3	0.16414
GBP3	4	0.91523	0.91529	1	17306	0	0.15298	0.043634	0.10534	0.9991	1984	2	0.15298
CFAP20	4	0.71098	0.72283	1	13518	1	0.048618	0.043651	0.10537	0.9991	1985	1	0.048618
XPC	4	0.58948	0.64272	1	12059	1	0.28368	0.043654	0.10538	0.9991	1986	3	0.28368
SRGAP3	4	0.015233	0.047002	0.926721	950	1	0.27047	0.043695	0.10546	0.9991	1987	3	0.27047
TACR2	4	0.83606	0.83604	1	15766	0	0.20139	0.043729	0.10552	0.9991	1988	2	0.20139
PDE8B	4	0.026871	0.071996	0.949464	1435	2	-0.11726	0.043753	0.10559	0.9991	1989	1	-0.11726
NUDT3	4	0.90408	0.90409	1	17096	0	0.15797	0.043836	0.10577	0.9991	1990	2	0.15797
SUV420H1	4	0.85231	0.85216	1	16082	0	0.21461	0.043847	0.1058	0.9991	1991	2	0.21461
FAM19A2	4	0.10087	0.21602	0.989653	4120	2	0.061825	0.043871	0.10585	0.9991	1992	2	0.061825
COX15	3	0.90775	0.90784	1	17164	0	1.0633	0.043903	0.096105	0.9991	1993	2	1.0633
TBCD	3	0.22973	0.34866	0.997	6881	2	-0.35713	0.043903	0.096105	0.9991	1994	1	-0.35713
NOL9	3	0.6359	0.64046	1	12570	1	0.98933	0.043903	0.096105	0.9991	1995	2	0.98933
WRB	4	0.81813	0.81809	1	15411	0	0.40971	0.043905	0.10591	0.9991	1996	2	0.40971
GHRH	4	0.86869	0.86859	1	16399	0	0.12078	0.043942	0.10599	0.9991	1997	2	0.12078
OR4C6	4	0.95353	0.95357	1	18063	0	0.24041	0.043945	0.106	0.9991	1998	3	0.24041
KANSL3	4	0.85751	0.8574	1	16192	0	0.6319	0.043978	0.10607	0.9991	1999	2	0.6319
[truncated: 17,105 more rows]

## Sheet: BC2_sgRNA
id	num	neg|score	neg|p-value	neg|fdr	neg|rank	neg|goodsgrna	neg|lfc	pos|score	pos|p-value	pos|fdr	pos|rank	pos|goodsgrna	pos|lfc
Non-Targeting-Control	997	1	1	1	19108	162	0.52184	9.1576e-32	2.5901e-07	0.001238	1	573	0.52184
ARID1A	4	1	1	1	19113	0	3.9652	1.6581e-09	2.5901e-07	0.001238	2	4	3.9652
SMARCC1	4	1	1	1	19112	0	5.2252	5.6608e-09	2.5901e-07	0.001238	3	4	5.2252
SLC39A1	4	1	1	1	19110	0	3.7454	1.1148e-07	2.5901e-07	0.001238	4	4	3.7454
UBA5	4	0.95566	0.95558	1	17854	0	3.8924	4.2488e-07	1.2951e-06	0.00495	5	3	3.8924
FAM20B	4	1	1	1	19111	0	3.1425	1.3215e-06	3.8852e-06	0.012023	6	4	3.1425
KLHL24	4	1	1	1	19109	0	3.7046	1.9425e-06	4.4032e-06	0.012023	7	4	3.7046
SLC26A2	4	0.99845	0.99846	1	19046	0	3.2898	2.7851e-06	8.0294e-06	0.019183	8	4	3.2898
PTPN2	4	0.99999	0.99999	1	19107	0	4.0801	4.3341e-06	1.2174e-05	0.025853	9	4	4.0801
CASP3	4	0.99999	0.99999	1	19106	0	3.5634	1.2661e-05	4.4809e-05	0.085644	10	4	3.5634
PTMS	4	0.99996	0.99996	1	19105	0	3.143	3.5337e-05	0.00012588	0.218722	11	4	3.143
MOAP1	4	0.99906	0.99905	1	19065	0	3.6567	4.2705e-05	0.00015877	0.241051	12	4	3.6567
CHST15	4	0.99996	0.99995	1	19104	0	3.6511	4.4236e-05	0.00016395	0.241051	13	4	3.6511
OR6X1	4	0.99995	0.99995	1	19103	0	2.9071	4.9161e-05	0.00018157	0.245215	14	4	2.9071
GALNT18	4	0.72691	0.75519	1	13089	1	3.7396	5.2606e-05	0.00019245	0.245215	15	3	3.7396
SGCZ	4	0.35246	0.50338	1	8115	2	1.8782	7.9189e-05	0.00030278	0.356727	16	2	1.8782
SH2D1A	4	0.99992	0.99992	1	19102	0	2.5137	8.2449e-05	0.00031729	0.356727	17	4	2.5137
OR6B2	4	0.85107	0.85052	1	15337	1	3.1411	9.6051e-05	0.00036495	0.387514	18	3	3.1411
RIPPLY3	4	0.69863	0.73826	1	12730	1	0.76969	0.00012983	0.00050222	0.45	19	2	0.76969
MARCO	4	0.82699	0.8283	1	14824	1	2.1297	0.0001398	0.00053745	0.45	20	2	2.1297
EIF2A	4	0.99929	0.99929	1	19076	0	3.2943	0.00014432	0.00055351	0.45	21	4	3.2943
LMF1	4	0.99985	0.99985	1	19101	0	2.6124	0.00015166	0.00058718	0.45	22	4	2.6124
SLC35E2B	4	0.99985	0.99985	1	19100	0	3.1794	0.00015301	0.00059236	0.45	23	4	3.1794
BTNL10	4	0.85651	0.85603	1	15470	0	3.6294	0.00016103	0.00061878	0.45	24	3	3.6294
APOL4	4	0.99756	0.99756	1	19012	0	3.8216	0.00016283	0.00062551	0.45	25	4	3.8216
ZDHHC13	4	0.99983	0.99983	1	19099	0	2.1806	0.00016981	0.00064934	0.45	26	4	2.1806
TRAF3	4	0.59884	0.68683	1	11624	1	2.9835	0.00017169	0.00065608	0.45	27	3	2.9835
IMPAD1	4	0.99967	0.99968	1	19094	0	3.5045	0.00017669	0.0006711	0.45	28	4	3.5045
MAGEA4	4	0.34015	0.49139	1	7900	2	1.7445	0.00018091	0.00068716	0.45	29	2	1.7445
INTU	4	0.95887	0.95882	1	17930	0	3.6317	0.00018593	0.00070633	0.45	30	3	3.6317
LPAR2	4	0.95251	0.95239	1	17782	0	3.4141	0.00022326	0.00083531	0.478421	31	3	3.4141
ACSM4	4	0.61523	0.69463	1	11783	1	3.4669	0.00022494	0.00084153	0.478421	32	3	3.4669
RAB12	4	0.92434	0.92416	1	17074	0	1.0302	0.00023368	0.00087727	0.478421	33	3	1.0302
MYO1B	4	0.73411	0.75971	1	13201	1	2.0492	0.00024078	0.00089851	0.478421	34	2	2.0492
BARHL1	4	0.99976	0.99975	1	19098	0	2.5668	0.00024339	0.00090266	0.478421	35	4	2.5668
SLC38A3	4	0.99591	0.99594	1	18954	0	3.0217	0.00024512	0.00090835	0.478421	36	4	3.0217
MEI4	4	0.99975	0.99974	1	19097	0	3.631	0.00025378	0.00094125	0.478421	37	4	3.631
DGKK	4	0.99974	0.99974	1	19096	0	2.7754	0.00025941	0.00096327	0.478421	38	4	2.7754
UFSP2	4	0.98011	0.98017	1	18517	0	2.7552	0.00026161	0.00097622	0.478421	39	4	2.7552
PLLP	4	0.99758	0.99758	1	19014	0	3.2499	0.00032333	0.0011896	0.526634	40	4	3.2499
FUT3	4	0.68998	0.73341	1	12631	1	3.0452	0.00032418	0.0011927	0.526634	41	3	3.0452
MAP2K2	4	0.99967	0.99968	1	19095	0	2.8271	0.00033214	0.0012223	0.526634	42	4	2.8271
RYR3	4	0.99966	0.99968	1	19093	0	2.348	0.00033599	0.0012378	0.526634	43	4	2.348
HHEX	4	0.94196	0.94189	1	17509	0	1.505	0.00033752	0.0012414	0.526634	44	2	1.505
SPTAN1	4	0.99966	0.99967	1	19092	0	2.4439	0.00033994	0.0012503	0.526634	45	4	2.4439
KCNQ5	4	0.99717	0.99718	1	19005	0	2.7187	0.00034496	0.0012684	0.526634	46	4	2.7187
VWA1	4	0.20549	0.36152	1	5858	2	1.5727	0.00035437	0.0013041	0.526634	47	2	1.5727
PRPSAP1	4	0.40671	0.55621	1	9049	1	2.9701	0.00036212	0.0013352	0.526634	48	3	2.9701
CETN2	4	0.99963	0.99963	1	19091	0	2.6057	0.00037279	0.0013772	0.526634	49	4	2.6057
DCUN1D3	4	0.79643	0.80335	1	14254	1	2.7607	0.00037291	0.0013777	0.526634	50	3	2.7607
CDH12	4	0.7282	0.75599	1	13114	1	3.2702	0.00040128	0.0014709	0.536615	51	3	3.2702
KCNIP4	4	0.92128	0.92109	1	17010	0	3.1107	0.00040359	0.0014782	0.536615	52	3	3.1107
SCRN3	4	0.99959	0.99961	1	19090	0	2.342	0.00040536	0.001488	0.536615	53	4	2.342
TAS2R38	4	0.57579	0.67623	1	11394	1	3.5064	0.00043069	0.001573	0.543274	54	3	3.5064
NEURL1	4	0.42173	0.57089	1	9317	2	1.6845	0.00043488	0.001588	0.543274	55	2	1.6845
RETNLB	4	0.96092	0.96083	1	17983	0	3.2761	0.00044214	0.0016175	0.543274	56	3	3.2761
MCHR2	4	0.99955	0.99957	1	19089	0	2.0503	0.00044868	0.0016445	0.543274	57	4	2.0503
NDRG1	4	0.99259	0.99265	1	18841	0	2.6095	0.00044942	0.0016486	0.543274	58	4	2.6095
CSGALNACT1	4	0.99953	0.99955	1	19088	0	2.1474	0.00047094	0.001733	0.548206	59	4	2.1474
ZNF526	4	0.99953	0.99955	1	19087	0	2.516	0.00047194	0.0017346	0.548206	60	4	2.516
OR1G1	4	0.99952	0.99954	1	19086	0	2.9724	0.00047577	0.0017496	0.548206	61	4	2.9724
ITM2A	4	0.99951	0.99952	1	19085	0	2.4763	0.00048973	0.0018014	0.555334	62	4	2.4763
ODF4	4	0.98927	0.98931	1	18750	0	3.3563	0.00049955	0.0018367	0.557206	63	4	3.3563
SLC16A4	4	0.99946	0.99947	1	19084	0	2.6099	0.0005403	0.0019734	0.563226	64	4	2.6099
HYPM	4	0.85582	0.8553	1	15448	0	2.7009	0.00054222	0.0019812	0.563226	65	3	2.7009
UXS1	4	0.99946	0.99947	1	19083	0	2.2005	0.00054316	0.0019833	0.563226	66	4	2.2005
CASP8	4	0.99713	0.99712	1	19001	0	2.5001	0.00055188	0.0020159	0.563226	67	4	2.5001
NME9	4	0.82458	0.82622	1	14779	1	3.3229	0.00056411	0.0020698	0.563226	68	3	3.3229
LRRC41	4	0.99943	0.99944	1	19082	0	3.047	0.00057083	0.0020988	0.563226	69	4	3.047
CCL2	4	0.99827	0.99828	1	19043	0	3.3153	0.000572	0.0021024	0.563226	70	4	3.3153
RALB	4	0.99757	0.99757	1	19013	0	3.3226	0.00058996	0.0021646	0.563226	71	4	3.3226
NFIX	4	0.92863	0.92843	1	17179	0	2.0526	0.00059709	0.0021884	0.563226	72	2	2.0526
GPR158	4	0.99939	0.9994	1	19081	0	2.7862	0.00061108	0.0022433	0.563226	73	4	2.7862
ZNF93	4	0.99938	0.99939	1	19080	0	2.2474	0.00061725	0.0022718	0.563226	74	4	2.2474
TP73	4	0.99702	0.99701	1	18997	0	2.6057	0.00062225	0.0022873	0.563226	75	4	2.6057
ARG1	4	0.45366	0.60195	1	9900	1	2.566	0.0006226	0.0022879	0.563226	76	3	2.566
CLSTN2	4	0.32299	0.47462	1	7614	2	0.054147	0.000649	0.0023795	0.563226	77	2	0.054147
JADE1	4	0.9687	0.96864	1	18203	0	3.2441	0.00066915	0.0024552	0.563226	78	3	3.2441
KIAA1755	4	0.99024	0.99025	1	18777	0	3.0149	0.00067329	0.0024697	0.563226	79	4	3.0149
LCE4A	4	0.3015	0.4539	1	7266	1	2.1574	0.00067694	0.0024826	0.563226	80	2	2.1574
ATP9B	4	0.99932	0.99933	1	19079	0	2.3656	0.00068188	0.0025034	0.563226	81	4	2.3656
LINGO2	4	0.99931	0.99932	1	19078	0	2.7067	0.00068903	0.0025303	0.563226	82	4	2.7067
INO80D	4	0.93594	0.93583	1	17371	0	2.4305	0.00069418	0.0025479	0.563226	83	3	2.4305
TRIL	4	0.53136	0.65711	1	11010	1	2.9272	0.00069997	0.0025686	0.563226	84	3	2.9272
LRRC72	4	0.48984	0.63713	1	10612	2	0.28666	0.0007009	0.0025707	0.563226	85	2	0.28666
OR2G3	4	0.99929	0.99929	1	19077	0	1.9654	0.00070833	0.0026007	0.563226	86	4	1.9654
HACD4	4	0.99928	0.99928	1	19075	0	3.004	0.0007158	0.0026246	0.563226	87	4	3.004
KPNA3	4	0.99928	0.99928	1	19074	0	1.9285	0.00072265	0.0026484	0.563226	88	4	1.9285
PCDHGC4	4	0.99927	0.99927	1	19073	0	2.0655	0.0007285	0.0026707	0.563226	89	4	2.0655
OTP	4	0.99927	0.99927	1	19072	0	2.7743	0.00073497	0.0026976	0.563226	90	4	2.7743
GABRA1	4	0.99926	0.99926	1	19071	0	2.4133	0.0007395	0.0027111	0.563226	91	4	2.4133
PATL2	4	0.63883	0.70621	1	12043	1	0.35106	0.00075281	0.0027536	0.5659	92	2	0.35106
LDHAL6A	3	0.99923	0.99924	1	19070	0	2.5954	0.00077372	0.0022195	0.563226	93	3	2.5954
OR2D2	4	0.98145	0.98148	1	18554	0	2.771	0.00079678	0.0029136	0.592427	94	4	2.771
RAB5A	4	0.75667	0.77457	1	13546	1	0.14162	0.00080471	0.0029447	0.592444	95	1	0.14162
SMIM22	4	0.99917	0.99915	1	19069	0	2.4349	0.00083332	0.0030405	0.605353	96	4	2.4349
TMEM257	4	0.23122	0.38641	1	6190	2	0.4015	0.00085661	0.0031255	0.615852	97	2	0.4015
KRTAP16-1	4	0.99913	0.99913	1	19068	0	2.5441	0.00086562	0.0031607	0.616438	98	4	2.5441
FNDC5	4	0.99911	0.9991	1	19067	0	2.0459	0.00088838	0.0032426	0.626013	99	4	2.0459
FGF14	4	0.85166	0.8511	1	15355	1	3.0261	0.00091663	0.0033431	0.633283	100	3	3.0261
RRH	4	0.99908	0.99907	1	19066	0	1.6138	0.00092116	0.0033669	0.633283	101	4	1.6138
ANXA1	4	0.98296	0.983	1	18589	0	3.0559	0.00092655	0.0033871	0.633283	102	4	3.0559
LYST	4	0.99906	0.99905	1	19064	0	2.2783	0.00094039	0.0034311	0.633283	103	4	2.2783
AKR1C3	4	0.99905	0.99904	1	19063	0	3.1502	0.00094921	0.0034648	0.633283	104	4	3.1502
OR5M10	4	0.92754	0.92732	1	17154	0	1.5813	0.00096041	0.0035021	0.633283	105	3	1.5813
ZBTB7A	4	0.99901	0.999	1	19062	0	1.6703	0.00098596	0.0035782	0.633283	106	4	1.6703
B4GALT7	4	0.99763	0.99763	1	19019	0	3.0463	0.0010123	0.0036741	0.633283	107	4	3.0463
UBFD1	4	0.99897	0.99896	1	19061	0	2.3828	0.0010281	0.0037249	0.633283	108	4	2.3828
ATG9B	4	0.99596	0.99599	1	18957	0	2.9039	0.0010317	0.003744	0.633283	109	4	2.9039
CYP4F2	4	0.89038	0.89004	1	16263	0	2.0522	0.0010529	0.0038202	0.633283	110	2	2.0522
NKG7	4	0.99526	0.99529	1	18927	0	3.3586	0.0010666	0.0038673	0.633283	111	4	3.3586
CLTA	4	0.93262	0.93239	1	17284	0	3.0635	0.0010666	0.0038673	0.633283	112	3	3.0635
CNIH1	4	0.54958	0.66476	1	11158	1	2.2738	0.0010712	0.0038865	0.633283	113	3	2.2738
PARD6A	4	0.9202	0.92001	1	16975	0	1.927	0.0010825	0.0039279	0.633283	114	2	1.927
JCHAIN	4	0.9623	0.96222	1	18016	0	3.2366	0.0010829	0.003929	0.633283	115	3	3.2366
SLC25A32	4	0.99891	0.99889	1	19060	0	2.0407	0.0010939	0.0039637	0.633283	116	4	2.0407
KITLG	4	0.9989	0.99889	1	19059	0	2.0977	0.001096	0.0039782	0.633283	117	4	2.0977
PTH	4	0.58704	0.68131	1	11499	1	2.9896	0.0011058	0.0040175	0.633283	118	3	2.9896
XK	4	0.88892	0.88856	1	16219	0	2.8793	0.0011144	0.0040486	0.633283	119	3	2.8793
MATN1	4	0.47191	0.61971	1	10257	1	2.1918	0.0011161	0.0040517	0.633283	120	3	2.1918
DLG5	4	0.8279	0.82907	1	14847	1	3.0997	0.0011302	0.0040973	0.633283	121	3	3.0997
SLC24A1	4	0.98664	0.98664	1	18694	0	3.476	0.0011429	0.0041393	0.633283	122	4	3.476
CEP78	4	0.99884	0.99882	1	19058	0	2.0466	0.0011611	0.0042087	0.633283	123	4	2.0466
SRM	4	0.80891	0.8132	1	14489	1	2.9279	0.001162	0.0042113	0.633283	124	3	2.9279
CA6	4	0.93583	0.93571	1	17367	0	3.0048	0.0011782	0.0042693	0.633283	125	3	3.0048
OR4Q3	4	0.80552	0.81053	1	14431	1	1.7248	0.0011823	0.0042833	0.633283	126	2	1.7248
PIP	4	0.99881	0.9988	1	19057	0	2.2501	0.0011926	0.004317	0.633283	127	4	2.2501
COL8A2	4	0.56644	0.6721	1	11302	1	0.98704	0.0011939	0.0043227	0.633283	128	2	0.98704
SIX4	4	0.8148	0.81805	1	14592	1	0.14032	0.0011939	0.0043227	0.633283	129	2	0.14032
FRMD4B	4	0.99877	0.99877	1	19056	0	1.7656	0.001226	0.0044433	0.633283	130	4	1.7656
HDHD1	4	0.85839	0.85793	1	15509	0	1.974	0.0012299	0.0044594	0.633283	131	2	1.974
CPT1B	4	0.99876	0.99875	1	19055	0	2.0116	0.0012407	0.0045065	0.633283	132	4	2.0116
ARHGEF4	4	0.99876	0.99875	1	19054	0	3.0089	0.0012407	0.0045065	0.633283	133	4	3.0089
NPTX1	4	0.99601	0.99605	1	18961	0	2.9802	0.0012446	0.0045205	0.633283	134	4	2.9802
TFEB	4	0.99864	0.99865	1	19048	0	3.0185	0.0012567	0.0045532	0.633283	135	4	3.0185
PRPS2	4	0.99874	0.99873	1	19053	0	2.3059	0.0012595	0.0045661	0.633283	136	4	2.3059
TNFRSF10A	4	0.41399	0.5633	1	9182	2	0.37977	0.0012717	0.0046174	0.633283	137	2	0.37977
ZMPSTE24	4	0.11923	0.24966	1	4273	2	1.0264	0.0012741	0.0046221	0.633283	138	2	1.0264
NFIB	4	0.9987	0.9987	1	19052	0	1.5738	0.0012972	0.0047013	0.633283	139	4	1.5738
ZNF821	4	0.99758	0.99758	1	19015	0	3.269	0.0012995	0.0047096	0.633283	140	4	3.269
NFATC1	4	0.25435	0.40863	1	6542	2	1.4178	0.0013009	0.0047148	0.633283	141	2	1.4178
VAMP3	4	0.99869	0.9987	1	19051	0	1.9826	0.0013065	0.0047303	0.633283	142	4	1.9826
EMID1	4	0.99869	0.99869	1	19050	0	2.5388	0.0013093	0.0047381	0.633283	143	4	2.5388
RBM12	4	0.043938	0.11308	0.830115	2601	2	-1.4746	0.0013236	0.0047987	0.636929	144	1	-1.4746
NLRP12	4	0.99867	0.99867	1	19049	0	1.8096	0.0013343	0.0048334	0.637112	145	4	1.8096
SLC35F3	4	0.30469	0.45695	1	7320	2	1.5221	0.0013854	0.0050095	0.655805	146	2	1.5221
TMEM210	4	0.73297	0.75902	1	13181	1	2.6527	0.0014213	0.0051308	0.665808	147	3	2.6527
ORMDL1	4	0.39476	0.54457	1	8825	2	-0.25052	0.0014274	0.0051556	0.665808	148	1	-0.25052
TRPC7	4	0.62341	0.69865	1	11875	1	3.0399	0.0014684	0.005309	0.673951	149	3	3.0399
RBM44	4	0.92417	0.92401	1	17069	0	2.0889	0.0014793	0.0053452	0.673951	150	3	2.0889
MTA3	4	0.95352	0.95341	1	17802	0	3.0198	0.0014835	0.0053597	0.673951	151	3	3.0198
GPX1	4	0.080953	0.1824	1	3401	1	2.8655	0.0014982	0.0054183	0.676859	152	3	2.8655
KLK7	4	0.99849	0.99851	1	19047	0	2.5812	0.0015085	0.0054602	0.677671	153	4	2.5812
CCR4	4	0.95221	0.9521	1	17775	0	1.3582	0.0015311	0.0055442	0.681106	154	3	1.3582
LRIF1	4	0.65384	0.71379	1	12207	1	3.1134	0.0015363	0.0055592	0.681106	155	3	3.1134
NLGN4Y	4	0.84717	0.84671	1	15242	1	0.86381	0.001583	0.0057224	0.686581	156	3	0.86381
HUS1B	4	0.53099	0.65696	1	11007	1	2.8775	0.00159	0.0057488	0.686581	157	3	2.8775
FBXO42	4	0.98544	0.98543	1	18666	0	2.9385	0.0015969	0.0057736	0.686581	158	4	2.9385
MAP3K7CL	4	0.98856	0.98861	1	18740	0	2.9011	0.0015969	0.0057736	0.686581	159	4	2.9011
DEFA3	4	0.9984	0.99841	1	19045	0	1.6909	0.0015991	0.0057835	0.686581	160	4	1.6909
ZNF645	4	0.95171	0.95161	1	17757	0	2.472	0.0016226	0.0058664	0.690986	161	3	2.472
ARMC9	4	0.29815	0.45064	1	7209	2	-0.35099	0.0016349	0.005914	0.690986	162	1	-0.35099
LMAN2L	4	0.51716	0.65137	1	10892	1	2.9395	0.0016399	0.005929	0.690986	163	3	2.9395
NEIL2	4	0.96172	0.96164	1	18002	0	2.8354	0.0017111	0.0061756	0.694913	164	3	2.8354
C11orf40	4	0.99827	0.99829	1	19044	0	1.517	0.0017292	0.0062466	0.694913	165	4	1.517
TMEM191B	4	0.18276	0.33965	1	5559	2	-0.59046	0.0017386	0.0062787	0.694913	166	1	-0.59046
PROM2	4	0.99825	0.99827	1	19042	0	2.2043	0.0017457	0.0063031	0.694913	167	4	2.2043
TMEM212	4	0.99005	0.99007	1	18767	0	2.71	0.0017487	0.006315	0.694913	168	4	2.71
PADI4	4	0.97844	0.97848	1	18465	0	2.0238	0.0017546	0.0063315	0.694913	169	4	2.0238
ADCY3	4	0.038535	0.10254	0.790564	2472	1	0.4117	0.0017905	0.0064719	0.694913	170	2	0.4117
COLEC11	4	0.19034	0.34694	1	5675	2	1.2252	0.0017965	0.0064875	0.694913	171	2	1.2252
POSTN	4	0.90654	0.90625	1	16649	0	3.1576	0.001823	0.0065714	0.694913	172	3	3.1576
SLITRK5	4	0.99818	0.9982	1	19041	0	3.0115	0.0018249	0.0065781	0.694913	173	4	3.0115
TEC	4	0.99817	0.9982	1	19040	0	1.7721	0.0018267	0.0065869	0.694913	174	4	1.7721
FAM122B	4	0.99816	0.99818	1	19039	0	1.8959	0.0018391	0.0066304	0.694913	175	4	1.8959
SCARB2	4	0.99136	0.9914	1	18814	0	2.8107	0.0018537	0.0066869	0.694913	176	4	2.8107
ADNP2	4	0.99814	0.99816	1	19038	0	2.1928	0.0018605	0.0067066	0.694913	177	4	2.1928
SYTL3	4	0.99813	0.99816	1	19037	0	2.4187	0.0018651	0.0067227	0.694913	178	4	2.4187
CYB5RL	3	0.99813	0.99818	1	19036	0	2.4239	0.0018719	0.0052831	0.673951	179	3	2.4239
FAM151B	4	0.99812	0.99814	1	19035	0	2.1446	0.0018775	0.0067641	0.694913	180	4	2.1446
LYSMD3	4	0.71899	0.75027	1	12997	1	0.51287	0.0018942	0.0068263	0.694913	181	2	0.51287
GGA2	4	0.99809	0.99812	1	19034	0	2.1539	0.0019067	0.0068693	0.694913	182	4	2.1539
SLCO1A2	4	0.99535	0.99538	1	18929	0	2.7588	0.0019276	0.0069501	0.694913	183	4	2.7588
DMXL2	4	0.80088	0.80682	1	14327	1	2.9421	0.0019372	0.0069765	0.694913	184	3	2.9421
LILRB1	4	0.97355	0.97348	1	18316	0	3.0937	0.0019373	0.0069765	0.694913	185	3	3.0937
TRIM33	4	0.99806	0.99807	1	19033	0	1.5693	0.0019427	0.0069993	0.694913	186	4	1.5693
ESD	4	0.76331	0.77917	1	13660	1	0.55516	0.001946	0.0070091	0.694913	187	2	0.55516
TMEM105	4	0.90071	0.90034	1	16505	0	1.9875	0.0019482	0.0070159	0.694913	188	2	1.9875
KCNH6	4	0.99805	0.99806	1	19032	0	1.7982	0.0019519	0.0070314	0.694913	189	4	1.7982
FAM63B	4	0.99803	0.99804	1	19031	0	1.6244	0.0019727	0.0071086	0.694913	190	4	1.6244
SCAF11	4	0.97313	0.97307	1	18310	0	2.6226	0.0019785	0.0071298	0.694913	191	3	2.6226
NBL1	4	0.23552	0.39052	1	6255	1	0.50273	0.0019979	0.0071966	0.694913	192	2	0.50273
TAS2R8	4	0.998	0.99801	1	19030	0	2.3674	0.0020003	0.0072075	0.694913	193	4	2.3674
KRTAP5-1	4	0.998	0.99801	1	19029	0	2.5988	0.0020045	0.0072241	0.694913	194	4	2.5988
B3GALT6	4	0.90376	0.90343	1	16575	0	2.0959	0.0020104	0.0072453	0.694913	195	3	2.0959
RBM46	4	0.99797	0.99799	1	19028	0	1.6723	0.0020292	0.0073101	0.694913	196	4	1.6723
XYLT2	4	0.95528	0.95517	1	17844	0	1.7435	0.0020498	0.0073717	0.694913	197	3	1.7435
GALNT5	4	0.66588	0.72015	1	12343	1	2.0503	0.0020664	0.0074349	0.694913	198	2	2.0503
ANKS4B	4	0.98051	0.98054	1	18527	0	2.7686	0.0020936	0.0075401	0.694913	199	4	2.7686
RNF121	4	0.83277	0.83338	1	14949	1	0.21252	0.0021016	0.0075681	0.694913	200	2	0.21252
CD40LG	4	0.69362	0.73547	1	12678	1	2.9849	0.002135	0.0076893	0.694913	201	3	2.9849
TRPC5OS	4	0.60774	0.69101	1	11716	1	2.9119	0.0021385	0.0077043	0.694913	202	3	2.9119
MET	4	0.90234	0.90197	1	16545	0	1.884	0.0021388	0.0077053	0.694913	203	2	1.884
KAT2A	4	0.87232	0.87193	1	15828	0	2.5708	0.0021414	0.0077142	0.694913	204	3	2.5708
RHOJ	4	0.67118	0.72302	1	12400	1	2.4789	0.0021489	0.0077395	0.694913	205	3	2.4789
RSAD2	4	0.45866	0.60682	1	10003	1	2.9681	0.0021532	0.0077525	0.694913	206	3	2.9681
PLOD2	4	0.99627	0.9963	1	18971	0	2.1419	0.0021535	0.007753	0.694913	207	4	2.1419
CAMKV	4	0.99784	0.99786	1	19027	0	2.1647	0.0021614	0.0077815	0.694913	208	4	2.1647
ACSM5	4	0.99418	0.99424	1	18889	0	2.7631	0.0021671	0.0078033	0.694913	209	4	2.7631
CCNJL	4	0.90522	0.90489	1	16618	0	2.7429	0.0021805	0.0078442	0.694913	210	3	2.7429
S100A7L2	4	0.50263	0.64564	1	10781	1	2.4302	0.0021806	0.0078442	0.694913	211	3	2.4302
SCCPDH	3	0.99233	0.99244	1	18837	0	3.6207	0.0021988	0.0061658	0.694913	212	3	3.6207
IFIT1	4	0.19667	0.35308	1	5748	2	-0.56239	0.0022053	0.0079265	0.694913	213	1	-0.56239
TNP2	4	0.98392	0.98392	1	18624	0	2.7233	0.0022085	0.0079364	0.694913	214	4	2.7233
TMTC3	4	0.99776	0.99777	1	19026	0	2.3829	0.0022448	0.0080664	0.694913	215	4	2.3829
ACRV1	4	0.96626	0.96621	1	18149	0	2.9615	0.0022559	0.0081079	0.694913	216	3	2.9615
IL15RA	4	0.99501	0.99505	1	18918	0	2.6845	0.0022565	0.0081084	0.694913	217	4	2.6845
ACP1	4	0.95613	0.95606	1	17864	0	2.4344	0.0022572	0.0081099	0.694913	218	3	2.4344
TSPAN2	4	0.94322	0.94311	1	17546	0	2.5141	0.002262	0.0081281	0.694913	219	3	2.5141
C9orf135	4	0.99774	0.99775	1	19025	0	2.4909	0.0022628	0.0081296	0.694913	220	4	2.4909
NIPA2	4	0.99773	0.99774	1	19024	0	1.5306	0.0022682	0.0081436	0.694913	221	4	1.5306
KLHDC4	4	0.99771	0.99772	1	19023	0	1.9969	0.0022923	0.0082223	0.694913	222	4	1.9969
VEZF1	4	0.8328	0.8334	1	14950	1	1.7946	0.002309	0.0082923	0.694913	223	3	1.7946
SPTB	4	0.70854	0.744	1	12853	1	2.8624	0.0023201	0.0083301	0.694913	224	3	2.8624
ZHX2	4	0.99767	0.99768	1	19022	0	2.1566	0.0023307	0.0083689	0.694913	225	4	2.1566
DCAF12L1	4	0.63625	0.70488	1	12013	1	1.713	0.0023608	0.0084756	0.694913	226	3	1.713
APP	4	0.99764	0.99764	1	19021	0	2.8488	0.0023644	0.0084886	0.694913	227	4	2.8488
ALKBH7	4	0.99764	0.99764	1	19020	0	2.8465	0.0023644	0.0084886	0.694913	228	4	2.8465
KLHDC8A	4	0.99762	0.99762	1	19018	0	1.8565	0.0023753	0.0085306	0.694913	229	4	1.8565
FOXI1	4	0.99761	0.99761	1	19017	0	2.4141	0.0023907	0.0085943	0.694913	230	4	2.4141
SLC4A5	4	0.92163	0.92143	1	17016	0	2.5243	0.0023928	0.0085995	0.694913	231	3	2.5243
PRR21	4	0.62569	0.69977	1	11901	1	2.9039	0.0023997	0.0086165	0.694913	232	3	2.9039
LRP3	4	0.57789	0.67715	1	11403	1	1.6935	0.0024059	0.0086368	0.694913	233	2	1.6935
KRTAP24-1	4	0.99759	0.99759	1	19016	0	1.1789	0.0024116	0.008658	0.694913	234	4	1.1789
RNF7	4	0.99677	0.99677	1	18985	0	1.971	0.0024127	0.0086627	0.694913	235	4	1.971
CHRNA2	4	0.32578	0.47737	1	7659	1	2.9715	0.0024129	0.0086632	0.694913	236	3	2.9715
SMIM13	4	0.98102	0.98104	1	18541	0	2.9155	0.0024188	0.0086896	0.694913	237	4	2.9155
FUNDC2	4	0.99756	0.99756	1	19011	0	2.8653	0.0024428	0.0087642	0.695147	238	4	2.8653
SFN	4	0.9957	0.99573	1	18940	0	2.7808	0.0024584	0.0088258	0.695147	239	4	2.7808
NXN	4	0.99248	0.99255	1	18839	0	3.1525	0.0024627	0.0088372	0.695147	240	4	3.1525
PBOV1	4	0.97577	0.97573	1	18381	0	2.1139	0.0024645	0.0088429	0.695147	241	3	2.1139
SDF2L1	4	0.9299	0.92969	1	17207	0	2.7721	0.0024799	0.0088849	0.695147	242	3	2.7721
ZMYND8	4	0.8338	0.83429	1	14972	1	0.21785	0.0025164	0.0089957	0.695147	243	1	0.21785
CNTNAP3	4	0.95219	0.95208	1	17774	0	2.7706	0.0025394	0.0090812	0.695147	244	3	2.7706
KHDRBS1	4	0.96387	0.96382	1	18064	0	2.7195	0.0025443	0.0090978	0.695147	245	3	2.7195
CDSN	4	0.99744	0.99745	1	19010	0	1.9744	0.0025592	0.0091392	0.695147	246	4	1.9744
CABS1	4	0.99744	0.99745	1	19009	0	1.7509	0.0025601	0.0091413	0.695147	247	4	1.7509
DEPDC1	4	0.99715	0.99715	1	19003	0	1.7855	0.0025682	0.0091677	0.695147	248	4	1.7855
TSPAN5	4	0.90387	0.90353	1	16579	0	2.9514	0.0025736	0.0091874	0.695147	249	3	2.9514
AIM1	4	0.98819	0.98823	1	18730	0	2.4085	0.0025867	0.0092314	0.695147	250	4	2.4085
FANCD2OS	4	0.28868	0.44154	1	7071	2	1.5494	0.0025867	0.0092314	0.695147	251	2	1.5494
UBE2F	4	0.46877	0.61664	1	10200	2	1.6142	0.0025993	0.0092698	0.695147	252	2	1.6142
RBMS1	4	0.59199	0.68366	1	11554	1	2.7094	0.0026014	0.0092744	0.695147	253	3	2.7094
FAM124A	4	0.92278	0.92265	1	17043	0	2.7295	0.0026338	0.0093869	0.699052	254	3	2.7295
ZNF429	4	0.99735	0.99735	1	19008	0	1.9669	0.0026472	0.009433	0.699052	255	4	1.9669
DAPK1	4	0.74996	0.7701	1	13449	1	2.5338	0.0026508	0.0094438	0.699052	256	3	2.5338
TGDS	4	0.9938	0.99384	1	18877	0	2.6253	0.0026963	0.0095972	0.702233	257	4	2.6253
KRTAP26-1	4	0.97731	0.97735	1	18423	0	2.9119	0.0026963	0.0095972	0.702233	258	4	2.9119
MYH2	4	0.97864	0.97868	1	18474	0	2.7879	0.0027048	0.0096262	0.702233	259	4	2.7879
DOCK8	4	0.82613	0.82751	1	14807	1	2.2065	0.0027188	0.0096775	0.703027	260	3	2.2065
EAF2	4	0.99727	0.99727	1	19007	0	1.7814	0.0027275	0.0097106	0.703027	261	4	1.7814
MCOLN1	4	0.86289	0.86245	1	15627	0	2.7799	0.0027446	0.0097712	0.704745	262	3	2.7799
MTRNR2L3	4	0.3728	0.52317	1	8453	2	1.2761	0.0027755	0.0098821	0.707201	263	2	1.2761
NOTCH2	4	0.94608	0.94601	1	17615	0	2.0008	0.0027868	0.0099194	0.707201	264	2	2.0008
LEFTY1	4	0.9972	0.99721	1	19006	0	2.5871	0.0027995	0.0099665	0.707201	265	4	2.5871
ARMC12	4	0.42995	0.57897	1	9479	1	1.8797	0.0027999	0.0099681	0.707201	266	2	1.8797
ZNF837	4	0.98424	0.98425	1	18631	0	2.6895	0.0028196	0.010047	0.707201	267	4	2.6895
RBCK1	4	0.96892	0.96886	1	18208	0	1.4218	0.0028273	0.010074	0.707201	268	3	1.4218
CCDC148	4	0.65826	0.71614	1	12254	1	2.781	0.0028296	0.010081	0.707201	269	3	2.781
SMIM6	4	0.99716	0.99716	1	19004	0	2.4145	0.0028389	0.010111	0.707201	270	4	2.4145
DDX60	4	0.47994	0.6275	1	10427	1	2.8644	0.0028532	0.010164	0.707201	271	3	2.8644
RBM26	4	0.99714	0.99714	1	19002	0	1.8824	0.0028575	0.010175	0.707201	272	4	1.8824
SMARCB1	4	0.95433	0.95422	1	17825	0	1.9064	0.0028791	0.010256	0.709226	273	3	1.9064
PAPSS1	3	0.99711	0.99715	1	19000	0	1.482	0.0028918	0.0080571	0.694913	274	3	1.482
R3HDML	4	0.97737	0.9774	1	18428	0	2.4762	0.0028954	0.010312	0.709226	275	4	2.4762
MALT1	4	0.9971	0.9971	1	18999	0	1.7347	0.0029007	0.010331	0.709226	276	4	1.7347
OR6C70	4	0.039619	0.10464	0.799019	2497	2	1.308	0.002931	0.010448	0.709226	277	2	1.308
DNAJC12	4	0.96559	0.96552	1	18118	0	2.8537	0.0029376	0.010469	0.709226	278	3	2.8537
DIRAS2	4	0.99702	0.99702	1	18998	0	1.9636	0.0029797	0.010615	0.709226	279	4	1.9636
KBTBD4	4	0.99701	0.99701	1	18996	0	1.6286	0.002991	0.010649	0.709226	280	4	1.6286
ZMYM2	4	0.96269	0.96262	1	18023	0	2.7684	0.003006	0.010706	0.709226	281	3	2.7684
NKAIN1	4	0.99699	0.99699	1	18995	0	1.4043	0.003011	0.010721	0.709226	282	4	1.4043
SLC39A8	4	0.6498	0.71175	1	12165	1	2.7774	0.0030131	0.010731	0.709226	283	3	2.7774
UBXN8	3	0.42761	0.52228	1	9432	1	3.5291	0.0030204	0.0084042	0.694913	284	2	3.5291
OR2T29	4	0.81846	0.82103	1	14657	1	3.0773	0.0030314	0.010794	0.709226	285	3	3.0773
CFAP52	4	0.97527	0.97522	1	18366	0	2.4617	0.0030321	0.010796	0.709226	286	3	2.4617
SYT17	4	0.48032	0.62787	1	10441	1	2.3136	0.0030346	0.010806	0.709226	287	3	2.3136
SIRT1	4	0.99627	0.9963	1	18972	0	2.6293	0.003037	0.010813	0.709226	288	4	2.6293
USP46	4	0.41679	0.56604	1	9222	1	2.7803	0.0030395	0.010819	0.709226	289	3	2.7803
PPP2R5E	4	0.99696	0.99696	1	18994	0	2.2762	0.0030404	0.010824	0.709226	290	4	2.2762
IL17F	4	0.99696	0.99695	1	18993	0	1.5897	0.0030441	0.010835	0.709226	291	4	1.5897
SHF	4	0.89888	0.89856	1	16465	0	2.6452	0.0030568	0.01088	0.709746	292	3	2.6452
SRGAP2B	4	0.013738	0.045097	0.478056	1791	2	-1.6012	0.0030864	0.010969	0.711781	293	1	-1.6012
GPR78	4	0.99691	0.9969	1	18992	0	2.0203	0.0030915	0.010986	0.711781	294	4	2.0203
FAM110A	4	0.99686	0.99686	1	18991	0	1.7114	0.0031377	0.011145	0.716789	295	4	1.7114
ESRRB	4	0.40847	0.55797	1	9080	2	0.42127	0.0031382	0.011146	0.716789	296	2	0.42127
KRT36	4	0.99685	0.99685	1	18990	0	1.4167	0.0031477	0.011183	0.716789	297	4	1.4167
CSAG3	4	0.94004	0.94002	1	17464	0	1.9648	0.0031791	0.011286	0.716789	298	2	1.9648
DRD1	4	0.99681	0.99681	1	18989	0	2.1912	0.0031897	0.011324	0.716789	299	4	2.1912
CSRP3	4	0.88706	0.88671	1	16170	0	0.077666	0.00319	0.011326	0.716789	300	1	0.077666
NDST3	4	0.9968	0.9968	1	18988	0	1.329	0.003203	0.011371	0.716978	301	4	1.329
GJA9	4	0.99678	0.99678	1	18986	0	2.4571	0.0032201	0.011441	0.716978	302	4	2.4571
CCDC155	4	0.99678	0.99678	1	18987	0	2.4262	0.0032201	0.011441	0.716978	303	4	2.4262
C2orf47	4	0.48548	0.6329	1	10538	1	2.1354	0.0032332	0.011481	0.717094	304	3	2.1354
HS6ST1	4	0.34904	0.50001	1	8063	1	1.3402	0.0032418	0.011522	0.717306	305	2	1.3402
BSPH1	4	0.92736	0.92714	1	17151	0	2.6624	0.003258	0.011578	0.718481	306	3	2.6624
SPDEF	4	0.98621	0.98621	1	18680	0	2.914	0.0032771	0.011643	0.720161	307	4	2.914
RERG	4	0.38054	0.53074	1	8569	2	1.0464	0.0032936	0.011689	0.720178	308	2	1.0464
ZNF705A	4	0.83856	0.83855	1	15065	1	2.4447	0.0033027	0.011718	0.720178	309	3	2.4447
CIDEA	4	0.99668	0.99668	1	18984	0	1.5259	0.0033228	0.011795	0.720281	310	4	1.5259
C1orf185	4	0.99667	0.99667	1	18983	0	1.8126	0.0033285	0.011814	0.720281	311	4	1.8126
PAK7	4	0.99666	0.99667	1	18982	0	1.327	0.003335	0.011833	0.720281	312	4	1.327
C9orf3	4	0.40495	0.55448	1	9011	1	0.096767	0.0033454	0.011874	0.720281	313	1	0.096767
ZNF664-FAM101A	4	0.99133	0.99138	1	18812	0	2.9602	0.0033551	0.011909	0.720281	314	4	2.9602
ASB11	4	0.38213	0.53228	1	8605	2	1.5083	0.0033676	0.011957	0.720832	315	2	1.5083
SCAMP1	4	0.54508	0.66283	1	11125	1	3.0842	0.0033819	0.012006	0.720832	316	3	3.0842
LY86	4	0.99661	0.99662	1	18981	0	1.3085	0.0033894	0.012031	0.720832	317	4	1.3085
SYT13	4	0.23099	0.3862	1	6186	1	2.6555	0.003418	0.012124	0.724118	318	3	2.6555
LTC4S	3	0.99658	0.99666	1	18980	0	2.3814	0.0034248	0.0094728	0.699052	319	3	2.3814
C17orf107	4	0.22162	0.37714	1	6073	2	1.205	0.0034557	0.01226	0.724984	320	2	1.205
VWA5B2	4	0.85889	0.85842	1	15517	0	1.9927	0.0034684	0.012301	0.724984	321	2	1.9927
ATP11A	4	0.93082	0.93058	1	17233	0	2.7624	0.003483	0.012354	0.724984	322	3	2.7624
NEUROD4	4	0.94067	0.94059	1	17480	0	2.7028	0.0034902	0.012382	0.724984	323	3	2.7028
CRISP2	4	0.63506	0.70431	1	11996	1	0.94893	0.0035008	0.012415	0.724984	324	2	0.94893
A2ML1	4	0.5939	0.68454	1	11571	1	2.6124	0.0035121	0.012456	0.724984	325	3	2.6124
EGR2	4	0.74431	0.7663	1	13358	1	2.6663	0.0035156	0.012467	0.724984	326	3	2.6663
ZNF865	4	0.84321	0.84289	1	15164	1	2.2633	0.0035161	0.012469	0.724984	327	3	2.2633
OR56A4	4	0.99648	0.99649	1	18979	0	2.0841	0.0035211	0.012479	0.724984	328	4	2.0841
CDHR5	4	0.99643	0.99645	1	18978	0	1.7097	0.0035668	0.01262	0.725463	329	4	1.7097
BRWD3	4	0.99643	0.99645	1	18977	0	2.0783	0.0035679	0.012625	0.725463	330	4	2.0783
NSUN6	4	0.99643	0.99645	1	18976	0	2.5651	0.0035702	0.012633	0.725463	331	4	2.5651
BTBD16	4	0.99643	0.99645	1	18975	0	1.8696	0.0035732	0.01264	0.725463	332	4	1.8696
KIR2DS4	4	0.42108	0.57025	1	9301	1	1.9747	0.0035853	0.012683	0.725781	333	3	1.9747
TMEM151A	4	0.13335	0.27356	1	4624	2	-0.94258	0.0036044	0.012758	0.7279	334	1	-0.94258
SCAF8	4	0.99638	0.9964	1	18974	0	2.1062	0.0036224	0.012825	0.729479	335	4	2.1062
NKX2-1	4	0.052652	0.1298	0.895471	2769	1	0.43186	0.0036562	0.012951	0.729479	336	2	0.43186
ARID4A	4	0.70199	0.74018	1	12768	1	1.6766	0.0036667	0.012993	0.729479	337	2	1.6766
PLCB1	4	0.14753	0.29704	1	4973	2	-0.24427	0.003708	0.013124	0.729479	338	2	-0.24427
ACE2	4	0.9809	0.98093	1	18539	0	2.5674	0.0037143	0.013148	0.729479	339	4	2.5674
COL15A1	4	0.99628	0.99631	1	18973	0	1.2026	0.0037235	0.013179	0.729479	340	4	1.2026
NDEL1	4	0.96499	0.96495	1	18090	0	2.624	0.003727	0.013188	0.729479	341	3	2.624
ABHD17C	4	0.99626	0.99629	1	18970	0	1.1818	0.0037423	0.013241	0.729479	342	4	1.1818
CRYAB	4	0.99625	0.99628	1	18969	0	1.5684	0.0037494	0.013268	0.729479	343	4	1.5684
GUCA2B	4	0.27128	0.42481	1	6789	2	-0.3115	0.0037598	0.013297	0.729479	344	1	-0.3115
C3orf67	4	0.8813	0.88082	1	16028	0	1.9881	0.0037604	0.0133	0.729479	345	2	1.9881
UGT1A4	4	0.99623	0.99627	1	18968	0	1.2582	0.0037652	0.013317	0.729479	346	4	1.2582
F9	4	0.67006	0.72239	1	12388	1	2.2672	0.0037755	0.013351	0.729479	347	3	2.2672
MRGBP	4	0.79468	0.80199	1	14225	1	2.165	0.0037755	0.013351	0.729479	348	3	2.165
CNGB3	4	0.9962	0.99623	1	18967	0	1.6937	0.0038004	0.013442	0.729479	349	4	1.6937
SGSM1	4	0.9962	0.99623	1	18966	0	2.2223	0.0038036	0.013452	0.729479	350	4	2.2223
KCNAB3	4	0.34584	0.49694	1	8005	1	2.401	0.0038164	0.013492	0.729479	351	3	2.401
SMIM3	4	0.99394	0.99399	1	18880	0	2.4395	0.0038264	0.013525	0.729479	352	4	2.4395
AKAP9	4	0.99617	0.99621	1	18965	0	1.4932	0.0038271	0.013529	0.729479	353	4	1.4932
BEX4	4	0.99615	0.99618	1	18964	0	1.1988	0.0038463	0.013604	0.729479	354	4	1.1988
PDZD11	4	0.10174	0.21946	1	3873	1	1.8164	0.003859	0.013643	0.729479	355	2	1.8164
SAMD13	4	0.77008	0.78388	1	13779	1	1.6955	0.003859	0.013643	0.729479	356	2	1.6955
CXXC5	4	0.84959	0.84908	1	15303	1	-0.07182	0.0038634	0.013664	0.729479	357	1	-0.07182
BCL9L	4	0.99611	0.99614	1	18963	0	2.3867	0.0038931	0.013751	0.731566	358	4	2.3867
SPCS1	4	0.4584	0.60657	1	9996	1	2.1235	0.0039125	0.01381	0.731566	359	3	2.1235
SLC35C2	4	0.98965	0.98967	1	18759	0	1.5131	0.0039151	0.013819	0.731566	360	4	1.5131
WDFY2	4	0.99607	0.99611	1	18962	0	1.5938	0.0039256	0.013856	0.731566	361	4	1.5938
NOTCH3	4	0.94075	0.94068	1	17481	0	2.5753	0.0039605	0.013974	0.731715	362	3	2.5753
ANO4	4	0.68394	0.73004	1	12564	1	1.7007	0.0039669	0.013997	0.731715	363	3	1.7007
TULP3	4	0.79889	0.8053	1	14292	1	2.2853	0.0040105	0.014145	0.731715	364	3	2.2853
ADGRA3	4	0.99598	0.99602	1	18960	0	1.3212	0.0040167	0.01417	0.731715	365	4	1.3212
PNMAL2	4	0.84577	0.84536	1	15212	1	0.79696	0.0040187	0.014177	0.731715	366	2	0.79696
LRRTM3	4	0.99598	0.99601	1	18958	0	1.5514	0.0040209	0.014187	0.731715	367	4	1.5514
FAM21A	4	0.99598	0.99601	1	18959	0	1.996	0.0040209	0.014187	0.731715	368	4	1.996
NFKBIZ	4	0.952	0.95189	1	17768	0	2.0767	0.0040247	0.014203	0.731715	369	3	2.0767
ZNF678	4	0.99595	0.99598	1	18956	0	1.4981	0.0040479	0.014273	0.731715	370	4	1.4981
OR5AC2	4	0.99595	0.99598	1	18955	0	1.1672	0.0040546	0.014296	0.731715	371	4	1.1672
PTBP2	4	0.3962	0.54593	1	8853	1	1.4254	0.0040705	0.014346	0.731715	372	2	1.4254
STS	3	0.87272	0.87285	1	15837	0	0.64866	0.0041035	0.011309	0.716789	373	2	0.64866
DNAJA1	4	0.99589	0.99592	1	18953	0	2.2015	0.0041095	0.014484	0.731715	374	4	2.2015
NES	4	0.99588	0.99591	1	18952	0	1.5947	0.0041171	0.014506	0.731715	375	4	1.5947
FBP1	4	0.99588	0.99591	1	18951	0	2.6315	0.0041171	0.014506	0.731715	376	4	2.6315
SLC1A6	4	0.56683	0.67227	1	11305	1	2.6864	0.0041423	0.014601	0.731715	377	3	2.6864
ZNF382	4	0.99584	0.99587	1	18950	0	2.0945	0.0041573	0.014651	0.731715	378	4	2.0945
ANKFY1	4	0.99583	0.99585	1	18949	0	2.0732	0.0041722	0.01469	0.731715	379	4	2.0732
MMACHC	4	0.96801	0.96796	1	18194	0	2.1593	0.004174	0.014694	0.731715	380	3	2.1593
TAB1	4	0.99582	0.99584	1	18948	0	1.5884	0.0041816	0.014721	0.731715	381	4	1.5884
TRIM58	4	0.93443	0.93429	1	17330	0	2.8076	0.0041858	0.014738	0.731715	382	3	2.8076
KIF26B	4	0.9958	0.99584	1	18947	0	1.6439	0.0041957	0.014772	0.731715	383	4	1.6439
C10orf111	4	0.99578	0.99581	1	18946	0	2.0019	0.0042232	0.014861	0.731715	384	4	2.0019
HTRA3	4	0.79021	0.79852	1	14136	1	0.046988	0.0042258	0.014872	0.731715	385	1	0.046988
ZBED2	4	0.8927	0.89237	1	16323	0	2.7247	0.0042276	0.014879	0.731715	386	3	2.7247
TCTE3	4	0.99576	0.99579	1	18945	0	1.2044	0.0042357	0.01491	0.731715	387	4	1.2044
SPEF1	4	0.99576	0.99579	1	18944	0	2.2487	0.0042426	0.014931	0.731715	388	4	2.2487
IL20RB	4	0.99574	0.99578	1	18943	0	1.6363	0.0042564	0.014973	0.731715	389	4	1.6363
TRAPPC13	4	0.7335	0.75934	1	13189	1	2.8055	0.0042614	0.014988	0.731715	390	3	2.8055
TCF7	4	0.99573	0.99576	1	18942	0	2.1372	0.0042681	0.015007	0.731715	391	4	2.1372
ZNF555	4	0.7732	0.78607	1	13828	1	1.0724	0.0042776	0.015038	0.731715	392	2	1.0724
PPP2R5A	4	0.99571	0.99574	1	18941	0	2.1329	0.0042907	0.015089	0.731715	393	4	2.1329
CISH	4	0.96073	0.96065	1	17978	0	2.7041	0.0043076	0.015144	0.731715	394	3	2.7041
FAM26D	4	0.99569	0.99573	1	18939	0	1.5073	0.0043103	0.015152	0.731715	395	4	1.5073
ZNF449	4	0.95361	0.9535	1	17806	0	2.3395	0.0043216	0.01518	0.731715	396	3	2.3395
ALS2CL	4	0.98929	0.98933	1	18751	0	2.708	0.0043417	0.015255	0.731715	397	4	2.708
ITGA1	4	0.80558	0.81059	1	14432	1	2.5656	0.0043807	0.015388	0.731715	398	3	2.5656
HECTD4	4	0.63916	0.70637	1	12046	1	0.21902	0.0043811	0.015388	0.731715	399	2	0.21902
GRHL3	4	0.99561	0.99565	1	18938	0	2.1029	0.0043882	0.015423	0.731715	400	4	2.1029
LMAN2	4	0.9956	0.99563	1	18937	0	2.2083	0.0044028	0.015464	0.731715	401	4	2.2083
CCR7	4	0.99559	0.99562	1	18936	0	2.3344	0.0044126	0.015493	0.731715	402	4	2.3344
PDE4C	4	0.99557	0.99561	1	18935	0	1.9116	0.0044255	0.015538	0.731715	403	4	1.9116
KIF2C	4	0.0043448	0.015263	0.246592	1177	3	-2.3104	0.0044328	0.015564	0.731715	404	1	-2.3104
ZNF214	4	0.99557	0.9956	1	18934	0	1.604	0.0044348	0.015569	0.731715	405	4	1.604
FAM120B	4	0.99556	0.9956	1	18933	0	2.0853	0.0044375	0.015576	0.731715	406	4	2.0853
DMTF1	4	0.9551	0.95499	1	17839	0	2.1777	0.0044523	0.01562	0.731715	407	3	2.1777
ARIH2OS	4	0.86617	0.86575	1	15703	0	2.5977	0.0044523	0.01562	0.731715	408	3	2.5977
SFXN3	4	0.99552	0.99556	1	18932	0	2.5706	0.0044765	0.015711	0.733144	409	4	2.5706
MYOM2	4	0.88697	0.88662	1	16167	0	1.9176	0.0044824	0.015727	0.733144	410	2	1.9176
SAGE1	4	0.9955	0.99554	1	18931	0	2.1399	0.0045004	0.015789	0.733839	411	4	2.1399
HOXC10	4	0.99431	0.99437	1	18898	0	2.5691	0.004507	0.015819	0.733839	412	4	2.5691
SERPINB1	4	0.89844	0.89813	1	16459	0	2.7941	0.0045229	0.015876	0.73403	413	3	2.7941
TSSK2	4	0.76292	0.7789	1	13652	1	1.0256	0.0045364	0.015916	0.73403	414	2	1.0256
OSR2	4	0.99545	0.99549	1	18930	0	1.6481	0.0045502	0.015966	0.73403	415	4	1.6481
PHYKPL	4	0.37903	0.52926	1	8550	1	2.7628	0.0045565	0.015984	0.73403	416	3	2.7628
GLYATL1	4	0.59286	0.68406	1	11564	1	1.4401	0.0045881	0.016087	0.73403	417	3	1.4401
PDPN	4	0.96157	0.96148	1	18001	0	2.5512	0.0046388	0.016256	0.73403	418	3	2.5512
HIBADH	4	0.99285	0.99291	1	18850	0	1.0555	0.0046399	0.01626	0.73403	419	4	1.0555
DNAH7	4	0.014539	0.047602	0.495273	1826	2	1.1511	0.0046583	0.016323	0.73403	420	2	1.1511
PGBD4	4	0.62466	0.69925	1	11891	1	2.5964	0.0046812	0.016396	0.73403	421	3	2.5964
ASAP1	4	0.98336	0.98338	1	18604	0	2.6079	0.0046812	0.016396	0.73403	422	4	2.6079
BBS1	4	0.9953	0.99534	1	18928	0	1.387	0.0046966	0.016458	0.73403	423	4	1.387
INSIG2	4	0.7627	0.77876	1	13646	1	1.7998	0.0047043	0.016493	0.73403	424	2	1.7998
RHOXF1	4	0.99276	0.99282	1	18846	0	2.4296	0.0047057	0.016501	0.73403	425	4	2.4296
TTC8	4	0.53151	0.65718	1	11012	1	2.2588	0.0047434	0.016632	0.73403	426	3	2.2588
NUDT13	4	0.99425	0.9943	1	18892	0	2.3787	0.0047548	0.016669	0.73403	427	4	2.3787
POU1F1	4	0.91846	0.91825	1	16932	0	1.6876	0.0047632	0.016693	0.73403	428	2	1.6876
TCEAL8	4	0.99523	0.99526	1	18926	0	1.5712	0.0047683	0.016711	0.73403	429	4	1.5712
HOOK3	4	0.99523	0.99525	1	18925	0	1.0059	0.0047701	0.016719	0.73403	430	4	1.0059
SMEK1	4	0.047229	0.11933	0.854827	2665	1	2.4708	0.0047748	0.01674	0.73403	431	3	2.4708
OR2M7	4	0.99522	0.99524	1	18924	0	1.8501	0.0047819	0.016768	0.73403	432	4	1.8501
CNR1	4	0.11033	0.23441	1	4064	1	2.6804	0.0047947	0.016809	0.73403	433	3	2.6804
CAD	4	0.26035	0.41433	1	6624	1	1.3606	0.0047951	0.01681	0.73403	434	3	1.3606
ZNF185	4	0.94023	0.94018	1	17469	0	2.9132	0.0048262	0.016917	0.73403	435	3	2.9132
SHISA9	4	0.73189	0.75833	1	13162	1	2.4879	0.0048296	0.016925	0.73403	436	3	2.4879
FBXO24	4	0.97839	0.97842	1	18464	0	2.327	0.0048379	0.016954	0.73403	437	4	2.327
ZNF420	4	0.87427	0.87384	1	15867	0	0.83185	0.0048469	0.016985	0.73403	438	2	0.83185
SSMEM1	4	0.993	0.99304	1	18853	0	2.2648	0.004863	0.017041	0.73403	439	4	2.2648
SCG5	4	0.99511	0.99514	1	18923	0	2.0833	0.0048929	0.017138	0.73403	440	4	2.0833
ZNF664	4	0.25356	0.40787	1	6533	2	-0.34438	0.0048986	0.017161	0.73403	441	1	-0.34438
PDE6G	4	0.80709	0.81176	1	14461	1	2.584	0.0048998	0.017165	0.73403	442	3	2.584
RAB40B	4	0.99509	0.99513	1	18922	0	2.6465	0.0049102	0.017201	0.73403	443	4	2.6465
GLI1	4	0.99507	0.99511	1	18921	0	1.1769	0.0049281	0.017262	0.73403	444	4	1.1769
LURAP1L	4	0.99507	0.99511	1	18920	0	1.373	0.004929	0.017265	0.73403	445	4	1.373
LRRC58	4	0.92251	0.92236	1	17031	0	2.5056	0.0049454	0.017321	0.73403	446	3	2.5056
SLC35G4	4	0.99505	0.99508	1	18919	0	2.1365	0.0049494	0.017332	0.73403	447	4	2.1365
AFF2	4	0.97969	0.97975	1	18503	0	1.2823	0.0049503	0.017337	0.73403	448	4	1.2823
FZD6	4	0.41932	0.5685	1	9269	1	2.3062	0.0049555	0.017356	0.73403	449	3	2.3062
DCAF12L2	4	0.97545	0.97538	1	18371	0	2.5304	0.0049674	0.017382	0.73403	450	3	2.5304
ZKSCAN7	4	0.39927	0.54899	1	8903	1	2.4643	0.0049744	0.017403	0.73403	451	3	2.4643
MCF2L	4	0.98589	0.98589	1	18676	0	2.3815	0.004981	0.01743	0.73403	452	4	2.3815
C2orf70	4	0.995	0.99504	1	18917	0	1.6114	0.004996	0.017474	0.73403	453	4	1.6114
SLC6A5	4	0.79703	0.80381	1	14262	1	2.709	0.0049963	0.017475	0.73403	454	3	2.709
SCAPER	4	0.87407	0.87363	1	15862	0	2.8697	0.0050005	0.01749	0.73403	455	3	2.8697
OVCA2	4	0.78384	0.7938	1	14028	1	2.8623	0.0050068	0.017513	0.73403	456	3	2.8623
IRAK4	4	0.99498	0.99501	1	18916	0	1.6926	0.0050215	0.017558	0.734331	457	4	1.6926
FOXI2	4	0.99496	0.995	1	18915	0	1.3846	0.0050376	0.017616	0.734597	458	4	1.3846
LDAH	4	0.86897	0.86854	1	15764	0	0.90145	0.0051056	0.017857	0.734597	459	3	0.90145
BAZ1A	4	0.14043	0.28542	1	4786	1	2.3569	0.0051242	0.017919	0.734597	460	3	2.3569
RXRA	4	0.99227	0.99233	1	18835	0	2.1783	0.0051276	0.01793	0.734597	461	4	2.1783
ZNF423	4	0.90072	0.90035	1	16506	0	1.0698	0.0051573	0.018015	0.734597	462	3	1.0698
OR2M4	4	0.25665	0.41083	1	6572	1	1.4665	0.005209	0.018197	0.734597	463	3	1.4665
PIGZ	4	0.34866	0.49965	1	8057	2	1.3674	0.005212	0.018206	0.734597	464	2	1.3674
HES2	4	0.99476	0.99481	1	18914	0	1.118	0.0052369	0.018287	0.734597	465	4	1.118
ARHGAP18	4	0.99475	0.9948	1	18913	0	1.2718	0.0052516	0.018338	0.734597	466	4	1.2718
TAS2R31	4	0.55203	0.66582	1	11179	1	1.7831	0.0052584	0.018359	0.734597	467	2	1.7831
SLC27A3	4	0.83121	0.83201	1	14909	1	1.6504	0.0052584	0.018359	0.734597	468	2	1.6504
PTEN	4	0.98511	0.98513	1	18656	0	2.1106	0.0052828	0.018453	0.734597	469	4	2.1106
KLHL22	4	0.99471	0.99476	1	18912	0	1.5342	0.0052887	0.018471	0.734597	470	4	1.5342
USP12	4	0.42714	0.57615	1	9423	1	2.0226	0.0052961	0.018488	0.734597	471	3	2.0226
JAGN1	4	0.9947	0.99475	1	18911	0	1.2025	0.0052963	0.01849	0.734597	472	4	1.2025
CRISPLD2	4	0.9947	0.99475	1	18910	0	1.4211	0.0052984	0.0185	0.734597	473	4	1.4211
JOSD1	4	0.96173	0.96165	1	18003	0	2.6628	0.0053354	0.018626	0.734597	474	3	2.6628
ARL2BP	4	0.99466	0.99471	1	18909	0	2.1422	0.0053403	0.018641	0.734597	475	4	2.1422
TBL1X	4	0.99186	0.99194	1	18829	0	2.7964	0.0053496	0.018666	0.734597	476	4	2.7964
GPR162	4	0.87523	0.87479	1	15893	0	1.7308	0.0053629	0.018715	0.734597	477	2	1.7308
ZMYM6	4	0.99464	0.99468	1	18908	0	1.3542	0.0053634	0.018716	0.734597	478	4	1.3542
HEATR3	4	0.86258	0.86215	1	15613	0	1.4106	0.0053642	0.018717	0.734597	479	3	1.4106
DGKB	4	0.9925	0.99256	1	18840	0	2.4481	0.0053754	0.018751	0.734597	480	4	2.4481
BCL2	4	0.87084	0.87044	1	15802	0	2.5591	0.0053987	0.018825	0.734597	481	3	2.5591
HBM	4	0.64016	0.70688	1	12056	1	2.5994	0.0053987	0.018825	0.734597	482	3	2.5994
MPP3	4	0.66334	0.71877	1	12314	1	0.89287	0.0054159	0.018882	0.734597	483	3	0.89287
PHOSPHO2	4	0.21684	0.37258	1	6007	2	1.1633	0.0054639	0.019051	0.734597	484	2	1.1633
KCNJ15	4	0.99046	0.99049	1	18784	0	2.3114	0.0054715	0.019072	0.734597	485	4	2.3114
KRTAP25-1	4	0.99451	0.99455	1	18907	0	1.6088	0.0054912	0.019134	0.734597	486	4	1.6088
BBOX1	4	0.38979	0.53967	1	8744	1	1.5828	0.0055	0.019169	0.734597	487	2	1.5828
ZNF211	4	0.6003	0.68754	1	11642	1	2.4069	0.0055	0.019169	0.734597	488	3	2.4069
ZCCHC5	4	0.52958	0.65641	1	10995	1	1.4071	0.0055194	0.019231	0.734597	489	2	1.4071
GPRIN3	4	0.99447	0.99451	1	18906	0	2.7361	0.0055321	0.019263	0.734597	490	4	2.7361
PCDHA4	4	0.63669	0.7051	1	12020	1	2.5052	0.0055385	0.019283	0.734597	491	3	2.5052
GSX1	4	0.95977	0.95969	1	17952	0	2.3714	0.0055385	0.019283	0.734597	492	3	2.3714
SLC39A2	4	0.99446	0.9945	1	18905	0	1.6671	0.00554	0.019289	0.734597	493	4	1.6671
DCAF8L1	4	0.99446	0.9945	1	18904	0	1.6161	0.0055432	0.019299	0.734597	494	4	1.6161
SLC38A4	4	0.99445	0.9945	1	18903	0	1.6128	0.0055474	0.019313	0.734597	495	4	1.6128
SRGAP1	4	0.8901	0.88979	1	16252	0	1.8972	0.0055613	0.019363	0.734597	496	3	1.8972
SDCBP2	4	0.99441	0.99445	1	18902	0	1.2611	0.005594	0.019474	0.734597	497	4	1.2611
CCNA1	4	0.83374	0.83423	1	14971	1	0.51387	0.0055969	0.019483	0.734597	498	2	0.51387
ASIP	4	0.37276	0.52313	1	8452	2	-0.074541	0.0055969	0.019483	0.734597	499	2	-0.074541
IFRD1	4	0.26555	0.41934	1	6709	2	1.5039	0.0056045	0.019503	0.734597	500	2	1.5039
RAC2	4	0.99438	0.99443	1	18901	0	2.0402	0.0056227	0.01957	0.734597	501	4	2.0402
VIT	4	0.99437	0.99442	1	18900	0	1.8848	0.0056329	0.019599	0.734597	502	4	1.8848
CHST8	4	0.49224	0.6395	1	10652	2	1.5231	0.0056342	0.019602	0.734597	503	2	1.5231
SH3YL1	4	0.99434	0.9944	1	18899	0	1.7077	0.005658	0.019675	0.734597	504	4	1.7077
TRIM43B	4	0.22936	0.38465	1	6162	2	1.1323	0.0056732	0.01973	0.734597	505	2	1.1323
ARHGAP15	4	0.93222	0.93199	1	17272	0	1.7015	0.0056745	0.019733	0.734597	506	3	1.7015
DIP2C	4	0.9943	0.99435	1	18896	0	2.3999	0.0056994	0.019826	0.734597	507	4	2.3999
ADTRP	4	0.9943	0.99435	1	18897	0	1.3401	0.0056994	0.019826	0.734597	508	4	1.3401
SLC12A8	4	0.53922	0.66038	1	11079	1	2.3097	0.0057001	0.01983	0.734597	509	3	2.3097
NAIF1	4	0.72965	0.75691	1	13129	1	1.8669	0.0057008	0.019832	0.734597	510	2	1.8669
OR5D16	4	0.99428	0.99434	1	18895	0	1.5988	0.0057193	0.019893	0.734597	511	4	1.5988
ATN1	4	0.99427	0.99433	1	18894	0	1.2413	0.0057258	0.019915	0.734597	512	4	1.2413
BTBD1	4	0.99426	0.99432	1	18893	0	2.2896	0.0057399	0.019963	0.734597	513	4	2.2896
APOO	4	0.91485	0.91464	1	16852	0	2.5397	0.0057446	0.019975	0.734597	514	3	2.5397
LYPD6B	4	0.7516	0.77122	1	13470	1	1.8196	0.0057538	0.020003	0.734597	515	2	1.8196
PEG3	4	0.89824	0.89794	1	16455	0	1.9116	0.0057746	0.02007	0.734597	516	2	1.9116
CSN2	4	0.6632	0.71869	1	12312	1	1.3414	0.0057779	0.020082	0.734597	517	3	1.3414
RNF126	4	0.93201	0.93177	1	17265	0	2.6911	0.005782	0.020096	0.734597	518	3	2.6911
CCL21	4	0.9942	0.99425	1	18891	0	1.7069	0.0058019	0.020163	0.734597	519	4	1.7069
TCL1A	4	0.99419	0.99425	1	18890	0	1.1396	0.0058051	0.02017	0.734597	520	4	1.1396
TNFRSF13B	4	0.87985	0.87938	1	15990	0	1.7025	0.0058164	0.020211	0.734597	521	2	1.7025
N4BP3	4	0.98297	0.983	1	18590	0	2.4415	0.0058296	0.020254	0.734597	522	4	2.4415
TEAD1	4	0.99113	0.99118	1	18806	0	2.2046	0.005842	0.020295	0.734597	523	4	2.2046
C6orf229	4	0.0934	0.20478	1	3674	2	0.8364	0.0058582	0.02035	0.734597	524	2	0.8364
C11orf42	4	0.99412	0.99418	1	18888	0	1.8889	0.0058759	0.02041	0.734597	525	4	1.8889
OR2L8	4	0.29961	0.45206	1	7235	2	-0.51541	0.0058813	0.020428	0.734597	526	1	-0.51541
TMEM218	4	0.51792	0.65168	1	10897	1	1.8474	0.0058886	0.020448	0.734597	527	2	1.8474
KNOP1	4	0.99411	0.99417	1	18887	0	1.4919	0.0058913	0.02046	0.734597	528	4	1.4919
IQCG	4	0.97563	0.97558	1	18377	0	2.5284	0.0059034	0.020505	0.734597	529	3	2.5284
LRCH4	4	0.99409	0.99415	1	18886	0	2.4747	0.0059107	0.020526	0.734597	530	4	2.4747
ERI2	4	0.46118	0.60926	1	10058	1	1.812	0.005933	0.020601	0.734597	531	2	1.812
TRPM4	4	0.9431	0.94301	1	17543	0	2.7783	0.0059386	0.02062	0.734597	532	3	2.7783
LPPR3	4	0.99405	0.99411	1	18885	0	2.1856	0.0059518	0.020661	0.734597	533	4	2.1856
FAM172A	4	0.99405	0.9941	1	18884	0	2.2398	0.0059534	0.020664	0.734597	534	4	2.2398
CDS2	4	0.99404	0.99409	1	18883	0	1.6851	0.0059629	0.020696	0.734597	535	4	1.6851
MBNL3	4	0.99402	0.99408	1	18882	0	2.1856	0.0059774	0.020742	0.734597	536	4	2.1856
LPGAT1	4	0.86325	0.86282	1	15639	0	2.1871	0.0060012	0.020824	0.734597	537	3	2.1871
CMC4	4	0.89563	0.89531	1	16381	0	2.4428	0.0060012	0.020824	0.734597	538	3	2.4428
RTP5	4	0.99174	0.99181	1	18826	0	2.5229	0.0060083	0.020847	0.734597	539	4	2.5229
FMO1	4	0.82694	0.82826	1	14822	1	2.5776	0.006015	0.02087	0.734597	540	3	2.5776
IFT88	4	0.99396	0.99401	1	18881	0	1.1233	0.0060435	0.020962	0.736468	541	4	1.1233
NFAT5	4	0.24663	0.40114	1	6421	2	1.1689	0.0060603	0.021022	0.737224	542	2	1.1689
CDK16	4	0.40836	0.55784	1	9077	1	2.0538	0.0060881	0.021113	0.739084	543	3	2.0538
KRTAP22-1	4	0.99384	0.99388	1	18879	0	1.9907	0.0061586	0.021332	0.742856	544	4	1.9907
GDF11	4	0.64127	0.70746	1	12071	1	1.6233	0.0061817	0.021413	0.742856	545	2	1.6233
KIAA1210	4	0.46804	0.61593	1	10189	1	0.49584	0.0061915	0.021447	0.742856	546	3	0.49584
FLT1	4	0.9938	0.99384	1	18878	0	1.0697	0.0061987	0.02147	0.742856	547	4	1.0697
ZNF223	4	0.99347	0.99351	1	18865	0	2.4225	0.0062088	0.021509	0.742856	548	4	2.4225
NKX2-5	4	0.048954	0.1226	0.866879	2702	2	0.34252	0.00622	0.021544	0.742856	549	2	0.34252
ID4	4	0.86909	0.86867	1	15767	0	1.2447	0.0062432	0.021618	0.742856	550	2	1.2447
PPP1R15A	4	0.99375	0.99379	1	18876	0	1.4179	0.0062458	0.021629	0.742856	551	4	1.4179
ARPIN	4	0.99374	0.99377	1	18875	0	2.1361	0.0062649	0.021693	0.742856	552	4	2.1361
SBK2	4	0.9937	0.99373	1	18874	0	1.0632	0.0063037	0.021813	0.742856	553	4	1.0632
MX1	4	0.99369	0.99373	1	18873	0	1.3587	0.0063066	0.021821	0.742856	554	4	1.3587
CLEC2D	4	0.96978	0.96972	1	18230	0	1.34	0.0063466	0.021957	0.742856	555	3	1.34
HCN1	4	0.99364	0.99367	1	18872	0	1.4213	0.0063597	0.022002	0.742856	556	4	1.4213
CXorf67	4	0.92434	0.92416	1	17073	0	2.4406	0.0063607	0.022004	0.742856	557	3	2.4406
HAAO	4	0.74055	0.76385	1	13306	1	1.0002	0.0063983	0.02213	0.742856	558	2	1.0002
RINL	4	0.99359	0.99363	1	18871	0	1.1222	0.0064066	0.022162	0.742856	559	4	1.1222
KLRF2	4	0.99358	0.99362	1	18870	0	1.5044	0.0064207	0.022206	0.742856	560	4	1.5044
WFS1	4	0.91879	0.91861	1	16938	0	2.4316	0.0064296	0.022239	0.742856	561	3	2.4316
PODNL1	4	0.56658	0.67217	1	11303	1	1.8284	0.0064376	0.022263	0.742856	562	2	1.8284
RHO	4	0.99355	0.99359	1	18869	0	2.6263	0.0064455	0.022292	0.742856	563	4	2.6263
OR6A2	4	0.81319	0.81672	1	14567	1	1.0053	0.0064499	0.022304	0.742856	564	2	1.0053
TBX5	4	0.99355	0.99359	1	18868	0	1.5109	0.0064508	0.022307	0.742856	565	4	1.5109
ATP11AUN	4	0.99354	0.99358	1	18867	0	2.1712	0.0064603	0.022345	0.742856	566	4	2.1712
STX8	4	0.98351	0.98353	1	18613	0	2.1276	0.0064791	0.022402	0.742856	567	4	2.1276
ZNF568	4	0.92319	0.92305	1	17049	0	2.3014	0.0064828	0.022414	0.742856	568	3	2.3014
FMNL1	4	0.99351	0.99355	1	18866	0	1.637	0.0064881	0.022431	0.742856	569	4	1.637
OR5H15	4	0.18867	0.34528	1	5651	1	1.999	0.006511	0.022498	0.742856	570	3	1.999
ARHGAP17	4	0.779	0.7902	1	13937	1	2.2867	0.006515	0.022513	0.742856	571	3	2.2867
WBP2NL	4	0.66273	0.71844	1	12306	1	2.4573	0.0065355	0.022572	0.742856	572	3	2.4573
TEX26	4	0.56251	0.67041	1	11272	1	2.4826	0.0065355	0.022572	0.742856	573	3	2.4826
ILKAP	4	0.93004	0.92983	1	17212	0	0.35342	0.0065533	0.022632	0.742856	574	2	0.35342
MAP3K14	4	0.85225	0.85168	1	15371	1	2.1092	0.006565	0.02267	0.742856	575	3	2.1092
CLDN14	4	0.99343	0.99347	1	18864	0	2.5718	0.006568	0.022679	0.742856	576	4	2.5718
DDRGK1	4	0.79465	0.80195	1	14224	1	2.2294	0.0065728	0.022701	0.742856	577	3	2.2294
LRFN2	4	0.9934	0.99344	1	18863	0	1.8197	0.0065992	0.022775	0.742856	578	4	1.8197
C1GALT1C1	4	0.86932	0.8689	1	15776	0	2.4814	0.0066033	0.02279	0.742856	579	3	2.4814
ASCL4	4	0.9858	0.98579	1	18672	0	2.5499	0.0066033	0.02279	0.742856	580	4	2.5499
GRIA4	4	0.78617	0.79551	1	14067	1	2.1962	0.0066143	0.02282	0.742856	581	3	2.1962
ZNF124	4	0.99337	0.99341	1	18862	0	1.4215	0.00663	0.022869	0.742856	582	4	1.4215
WDPCP	4	0.40942	0.5589	1	9099	2	-0.059015	0.0066566	0.022952	0.742856	583	1	-0.059015
ESCO1	3	0.99333	0.99348	1	18861	0	1.767	0.006667	0.018163	0.734597	584	3	1.767
TRIM26	4	0.8385	0.8385	1	15064	1	2.6395	0.0066758	0.023018	0.742856	585	3	2.6395
RNASE6	4	0.98576	0.98576	1	18671	0	1.8777	0.00676	0.023297	0.742856	586	4	1.8777
CACFD1	4	0.24392	0.39855	1	6378	2	1.2068	0.0067658	0.023315	0.742856	587	2	1.2068
CYB561	4	0.25844	0.41252	1	6605	1	2.3676	0.0067768	0.02335	0.742856	588	3	2.3676
ANKRD26	4	0.99322	0.99327	1	18860	0	1.1988	0.0067808	0.023357	0.742856	589	4	1.1988
FTMT	4	0.99321	0.99326	1	18859	0	1.5488	0.0067888	0.02338	0.742856	590	4	1.5488
CPA5	4	0.94513	0.94501	1	17590	0	2.0912	0.0068079	0.023434	0.742856	591	3	2.0912
PTPRK	4	0.99318	0.99322	1	18858	0	2.3264	0.0068245	0.023491	0.742856	592	4	2.3264
IL12A	4	0.99316	0.9932	1	18857	0	1.112	0.0068375	0.023531	0.742856	593	4	1.112
ARSH	4	0.8761	0.87565	1	15911	0	0.37265	0.0068375	0.023531	0.742856	594	2	0.37265
KPTN	4	0.15801	0.3141	1	5230	2	-0.85963	0.0068375	0.023531	0.742856	595	1	-0.85963
CHST4	4	0.73788	0.76214	1	13258	1	2.1342	0.0068391	0.023537	0.742856	596	3	2.1342
ELAVL2	4	0.63474	0.70415	1	11991	1	1.5075	0.0068459	0.023557	0.742856	597	2	1.5075
ZNF674	4	0.41725	0.56651	1	9230	2	1.3936	0.0068459	0.023557	0.742856	598	2	1.3936
RCCD1	4	0.88302	0.88259	1	16071	0	2.4156	0.0068527	0.023583	0.742856	599	3	2.4156
OPRK1	4	0.5488	0.66443	1	11155	1	2.2777	0.0068642	0.023614	0.742856	600	3	2.2777
SNX6	4	0.99312	0.99316	1	18856	0	1.4293	0.0068796	0.023658	0.742856	601	4	1.4293
CACNG7	4	0.84012	0.83998	1	15100	1	2.65	0.0068872	0.023684	0.742856	602	3	2.65
TCF4	3	0.99311	0.99325	1	18855	0	2.6028	0.006893	0.01878	0.734597	603	3	2.6028
RNF225	4	0.13516	0.27663	1	4667	2	0.99322	0.0068962	0.023708	0.742856	604	2	0.99322
GRM6	4	0.98825	0.98827	1	18734	0	2.2122	0.0068962	0.023708	0.742856	605	4	2.2122
MTRNR2L10	4	0.9444	0.94431	1	17576	0	2.4264	0.0068997	0.023721	0.742856	606	3	2.4264
SNX18	4	0.91751	0.91733	1	16905	0	2.339	0.0069081	0.02375	0.742856	607	3	2.339
MAPK9	4	0.70697	0.74309	1	12831	1	1.2901	0.006915	0.023768	0.742856	608	3	1.2901
EXO1	4	0.96355	0.96349	1	18053	0	2.0726	0.0069289	0.02382	0.742856	609	3	2.0726
SPATA31D1	4	0.87094	0.87054	1	15805	0	2.5028	0.0069375	0.023849	0.742856	610	3	2.5028
ABCB6	4	0.99303	0.99308	1	18854	0	1.2686	0.0069668	0.023942	0.742856	611	4	1.2686
LENG9	4	0.73124	0.7579	1	13153	1	2.6135	0.0069881	0.024011	0.742856	612	3	2.6135
FOXA2	4	0.85914	0.85865	1	15525	0	1.6715	0.0070183	0.024108	0.742856	613	3	1.6715
KRTAP4-4	4	0.98714	0.98717	1	18707	0	2.0118	0.0070354	0.024157	0.742856	614	4	2.0118
OR1D2	4	0.99295	0.993	1	18852	0	1.8241	0.0070479	0.024201	0.742856	615	4	1.8241
RAB23	4	0.43829	0.58697	1	9620	1	2.3208	0.0070685	0.024263	0.742856	616	3	2.3208
FOXF1	4	0.98589	0.98589	1	18675	0	2.7526	0.0070846	0.024311	0.742856	617	4	2.7526
VKORC1	4	0.89804	0.89777	1	16447	0	0.24914	0.0070958	0.024342	0.742856	618	2	0.24914
BARX1	4	0.19508	0.35151	1	5731	1	0.44255	0.0070958	0.024342	0.742856	619	2	0.44255
C1orf100	4	0.89006	0.88974	1	16251	0	2.0445	0.0070985	0.024356	0.742856	620	3	2.0445
TXLNG	4	0.98179	0.98183	1	18564	0	2.3193	0.0071118	0.024404	0.742856	621	4	2.3193
RSPH14	4	0.99288	0.99294	1	18851	0	2.1146	0.0071215	0.024438	0.742856	622	4	2.1146
ADAMTSL3	4	0.87556	0.87511	1	15898	0	2.2769	0.0071391	0.024496	0.742856	623	3	2.2769
OR10R2	4	0.5161	0.65095	1	10883	1	2.3537	0.0071498	0.024536	0.742856	624	3	2.3537
ZFP62	4	0.94836	0.94832	1	17674	0	2.7437	0.0071605	0.024572	0.742856	625	3	2.7437
TMEM156	4	0.99283	0.99289	1	18849	0	1.5091	0.0071668	0.02459	0.742856	626	4	1.5091
CTDSPL2	4	0.77655	0.78844	1	13885	1	1.2324	0.0071733	0.024616	0.742856	627	2	1.2324
MYH1	4	0.99279	0.99285	1	18848	0	1.3853	0.0072085	0.024731	0.742856	628	4	1.3853
ANGPTL7	4	0.99278	0.99284	1	18847	0	2.3012	0.0072162	0.024755	0.742856	629	4	2.3012
SLC1A7	4	0.10933	0.2327	1	4042	2	-0.78798	0.0072249	0.024781	0.742856	630	1	-0.78798
PLCD4	4	0.88152	0.88107	1	16035	0	2.9047	0.0072315	0.024803	0.742856	631	3	2.9047
ZFP28	4	0.97433	0.97426	1	18337	0	2.3335	0.0072315	0.024803	0.742856	632	3	2.3335
ITSN1	4	0.024772	0.075039	0.653102	2191	3	-1.3786	0.0072766	0.024947	0.742856	633	1	-1.3786
SERPINA11	4	0.93079	0.93054	1	17232	0	2.1968	0.0072813	0.024961	0.742856	634	3	2.1968
BCAP31	4	0.27555	0.42895	1	6861	1	1.963	0.0072841	0.024972	0.742856	635	3	1.963
HEXB	4	0.90769	0.90745	1	16677	0	2.1563	0.0072998	0.025024	0.742856	636	3	2.1563
TOMM5	4	0.99268	0.99273	1	18845	0	1.378	0.0073202	0.025096	0.742856	637	4	1.378
PTRHD1	4	0.018275	0.058813	0.563639	1988	2	0.17729	0.0073203	0.025096	0.742856	638	2	0.17729
DIRC2	4	0.99266	0.99271	1	18844	0	1.0896	0.007343	0.025168	0.742856	639	4	1.0896
KRTAP22-2	4	0.86462	0.8642	1	15671	0	1.3023	0.0073541	0.025207	0.742856	640	3	1.3023
AFF4	4	0.74241	0.76506	1	13334	1	1.868	0.0073541	0.025207	0.742856	641	3	1.868
ZP1	4	0.99264	0.9927	1	18843	0	2.3968	0.0073613	0.025231	0.742856	642	4	2.3968
MC3R	4	0.60503	0.68977	1	11691	1	2.6177	0.0073706	0.025262	0.742856	643	3	2.6177
MUM1L1	4	0.99263	0.99269	1	18842	0	1.6102	0.007371	0.025263	0.742856	644	4	1.6102
SAMD10	4	0.38244	0.53259	1	8611	1	2.3616	0.0073979	0.02535	0.743113	645	3	2.3616
HERPUD1	4	0.50977	0.64844	1	10837	1	2.568	0.0073979	0.02535	0.743113	646	3	2.568
LCE3C	4	0.96232	0.96224	1	18017	0	2.39	0.0074539	0.025546	0.744755	647	3	2.39
MARVELD2	4	0.8389	0.83884	1	15078	1	0.30746	0.0074573	0.025557	0.744755	648	2	0.30746
KRT28	4	0.34323	0.49439	1	7959	2	0.38539	0.0074573	0.025557	0.744755	649	2	0.38539
HLTF	4	0.60051	0.68764	1	11645	1	1.8904	0.007476	0.02561	0.745038	650	3	1.8904
MME	3	0.94601	0.94622	1	17612	0	0.61754	0.007479	0.020289	0.734597	651	3	0.61754
SUCO	4	0.83624	0.83647	1	15022	1	2.1717	0.0075268	0.025785	0.748486	652	3	2.1717
HDX	4	0.97555	0.97549	1	18374	0	1.0271	0.0075348	0.025807	0.748486	653	3	1.0271
ATG16L1	4	0.99243	0.99249	1	18838	0	0.90081	0.0075743	0.025938	0.749113	654	4	0.90081
HTR7	4	0.093948	0.20573	1	3688	1	0.26693	0.0075864	0.025982	0.749113	655	1	0.26693
DDX26B	4	0.9354	0.93529	1	17359	0	1.6645	0.0075896	0.025991	0.749113	656	2	1.6645
CTXN1	4	0.96964	0.96959	1	18225	0	2.1662	0.0075946	0.02601	0.749113	657	3	2.1662
CETN1	4	0.55598	0.66752	1	11211	1	2.085	0.007599	0.026025	0.749113	658	3	2.085
CSRP2	4	0.75062	0.77053	1	13457	1	0.52859	0.0076381	0.026131	0.749985	659	2	0.52859
FBLN7	4	0.80839	0.81279	1	14480	1	2.253	0.0076397	0.026134	0.749985	660	3	2.253
TGFBR2	4	0.98476	0.98475	1	18646	0	2.0806	0.007675	0.02624	0.751417	661	4	2.0806
PCGF3	4	0.82289	0.8248	1	14739	1	1.1133	0.0076897	0.02628	0.751417	662	3	1.1133
SOCS2	4	0.9923	0.99236	1	18836	0	0.9454	0.0076964	0.026301	0.751417	663	4	0.9454
ARHGAP28	4	0.99226	0.99232	1	18834	0	0.87731	0.0077369	0.026435	0.753057	664	4	0.87731
CFAP57	4	0.35999	0.5107	1	8235	2	-0.49232	0.0077413	0.026455	0.753057	665	1	-0.49232
CC2D2A	4	0.99225	0.99231	1	18833	0	1.258	0.0077491	0.026477	0.753057	666	4	1.258
KIAA0408	4	0.99222	0.99228	1	18832	0	1.7078	0.0077763	0.026564	0.75441	667	4	1.7078
PHOX2A	4	0.58419	0.68002	1	11464	1	0.28427	0.0078188	0.026692	0.754841	668	2	0.28427
ZNF605	4	0.9078	0.90756	1	16683	0	1.8979	0.0078188	0.026692	0.754841	669	3	1.8979
HAMP	4	0.22227	0.37779	1	6079	1	2.3395	0.0078205	0.026698	0.754841	670	3	2.3395
CTNND2	4	0.51788	0.65167	1	10896	1	1.6228	0.0078741	0.026869	0.758344	671	2	1.6228
SERTAD3	4	0.67224	0.72359	1	12416	1	2.1631	0.0078877	0.026916	0.758344	672	3	2.1631
C1orf195	4	0.84076	0.84057	1	15113	1	1.5906	0.0078962	0.026941	0.758344	673	3	1.5906
SQRDL	4	0.25144	0.40574	1	6499	2	1.359	0.0079117	0.026994	0.758729	674	2	1.359
SSR4	4	0.76273	0.77877	1	13648	1	0.47582	0.0079478	0.027101	0.760046	675	2	0.47582
CFAP70	4	0.93368	0.93351	1	17308	0	2.1658	0.007953	0.02712	0.760046	676	3	2.1658
SOST	4	0.25802	0.4121	1	6597	1	0.33657	0.0079995	0.027273	0.76234	677	2	0.33657
TSSK6	4	0.72462	0.75375	1	13058	1	2.25	0.0080034	0.027282	0.76234	678	3	2.25
EMCN	4	0.79597	0.80299	1	14248	1	2.297	0.0080324	0.027362	0.762816	679	3	2.297
INPP4B	4	0.71643	0.74868	1	12954	1	1.3508	0.0080511	0.027418	0.762816	680	2	1.3508
GCA	4	0.99195	0.99201	1	18831	0	1.2374	0.0080512	0.027419	0.762816	681	4	1.2374
TM4SF5	3	0.43924	0.52868	1	9644	1	1.0457	0.0080602	0.021829	0.742856	682	2	1.0457
RBM4B	4	0.66783	0.7212	1	12363	1	1.9079	0.0080682	0.027477	0.763319	683	3	1.9079
RIBC1	4	0.9919	0.99197	1	18830	0	0.86074	0.0080966	0.027576	0.764306	684	4	0.86074
EFCAB14	4	0.4307	0.57967	1	9495	1	1.8002	0.0081037	0.027592	0.764306	685	2	1.8002
C8orf4	4	0.99185	0.99192	1	18828	0	1.4012	0.0081493	0.02774	0.765805	686	4	1.4012
LTB4R2	4	0.92938	0.92917	1	17197	0	0.85644	0.0081543	0.027759	0.765805	687	3	0.85644
FGA	4	0.94812	0.94809	1	17670	0	1.9742	0.0081647	0.027793	0.765805	688	3	1.9742
CXCR4	4	0.9918	0.99186	1	18827	0	1.2947	0.0082023	0.027914	0.765805	689	4	1.2947
CTAGE5	4	0.79931	0.80562	1	14303	1	1.5351	0.0082059	0.027925	0.765805	690	2	1.5351
MYO19	4	0.99171	0.99177	1	18825	0	1.6816	0.0082918	0.02821	0.765805	691	4	1.6816
YTHDF1	4	0.76994	0.78378	1	13776	1	1.892	0.0083006	0.02824	0.765805	692	2	1.892
BEX2	4	0.23599	0.39097	1	6265	2	-0.1785	0.0083092	0.028261	0.765805	693	2	-0.1785
RAET1L	4	0.99169	0.99175	1	18824	0	1.4454	0.0083132	0.028275	0.765805	694	4	1.4454
WASF1	4	0.99167	0.99173	1	18823	0	1.3007	0.0083254	0.028314	0.765805	695	4	1.3007
KLLN	4	0.99165	0.9917	1	18822	0	1.873	0.0083533	0.028401	0.765805	696	4	1.873
TNFSF14	4	0.99164	0.9917	1	18821	0	1.4064	0.0083569	0.028413	0.765805	697	4	1.4064
NMRK1	4	0.98013	0.98018	1	18518	0	2.2835	0.0083608	0.02843	0.765805	698	4	2.2835
CHPF	4	0.60957	0.69188	1	11733	1	2.4779	0.0083634	0.028442	0.765805	699	3	2.4779
GLIPR1	4	0.99164	0.99169	1	18820	0	0.8518	0.0083648	0.028445	0.765805	700	4	0.8518
ERP27	4	0.87622	0.87579	1	15916	0	2.253	0.0083667	0.028452	0.765805	701	3	2.253
SHROOM2	4	0.99162	0.99168	1	18819	0	1.2374	0.0083785	0.028483	0.765805	702	4	1.2374
TMEM222	4	0.99158	0.99164	1	18818	0	1.4488	0.0084181	0.0286	0.765805	703	4	1.4488
POU3F4	4	0.12245	0.25514	1	4351	2	0.27317	0.0084382	0.02867	0.765805	704	2	0.27317
GPR180	4	0.62935	0.70153	1	11940	1	0.17698	0.0084382	0.02867	0.765805	705	2	0.17698
ANKRD1	4	0.95911	0.95902	1	17936	0	2.3648	0.0084442	0.028685	0.765805	706	3	2.3648
FCRL6	4	0.99154	0.99159	1	18817	0	1.8123	0.00846	0.028736	0.765805	707	4	1.8123
BST2	4	0.84769	0.84723	1	15256	1	2.4683	0.0084705	0.028771	0.765805	708	3	2.4683
INS	4	0.99153	0.99158	1	18816	0	1.055	0.0084745	0.028785	0.765805	709	4	1.055
OR5B2	4	0.95874	0.9587	1	17926	0	1.9602	0.0084831	0.028813	0.765805	710	3	1.9602
ZNRF1	4	0.66465	0.71948	1	12333	1	2.1584	0.0085081	0.028885	0.765805	711	3	2.1584
ZMYND12	4	0.55794	0.66837	1	11231	1	0.89771	0.0085156	0.028907	0.765805	712	3	0.89771
EPB41L4A	4	0.99145	0.99151	1	18815	0	1.2954	0.0085517	0.029023	0.765805	713	4	1.2954
GAGE12J	4	0.97106	0.97102	1	18255	0	1.7172	0.0085672	0.029077	0.765805	714	3	1.7172
GPBAR1	4	0.91463	0.91443	1	16849	0	2.2921	0.0085736	0.029097	0.765805	715	3	2.2921
QRICH1	4	0.3981	0.54782	1	8882	1	2.496	0.0085736	0.029097	0.765805	716	3	2.496
SP110	4	0.58732	0.68144	1	11502	1	2.1365	0.0086062	0.02919	0.765805	717	3	2.1365
OR11H4	4	0.9806	0.98063	1	18529	0	1.4505	0.0086446	0.029319	0.765805	718	4	1.4505
[truncated: 18,395 more rows]
